# Supplementary material
Source: publisher figshare collection journal article supplement (https://rs.figshare.com/ndownloader/files/13001750)
Supplement: Supplementary file 1 [file 13001750]

## Sheet: Summary
Supplementary File S7 - Sensitivity Analysis Results
Description of Analyses Performed
Media Analysis
Systematicaly alter the fluxes for the exchange reactions that supply the metabolites to the in silico metabolic model. The fluxes are varied from the maximum flux bound that is originally applied to them, to 0. Only reactions that have been bounded with a non-arbritarily large flux bound (i.e. ±1000 or inf) are analysed. The virus biomass function in his analysis remains unchanged from the origi…
Point Mutation Analysis
All conditions for the in silico metabolic model remain identical to the original analysis in the publication, apart from the virus biomass function. Point mutations are introduced into the virus genome (1, 2, 3, 4, 5 or 10 mutations at once) and a new virus biomass function is generated for this mutated virus (including the translated proteins). These new virus biomass functions are then analyse…
Random Mutation Analysis
All conditions for the in silico metabolic model remain identical to the original analysis in the publication, apart from the virus biomass function. The virus genome is mutated at a random number of points, from a uniform distribution that is of size 1 to the maximum length of the genome. A new virus biomass function is generated for this mutant with translated proteins. The copy numbers are var…
Description of Parameters in the Result Analysis
Threshold
The threshold parameter is used as a "cut off" when analysing the effect of the host-derived flux enforcement reactions. For example, a threshold value of 0.9 represents a virus optima that is 90% of the original wild-type optima. With this applied, any reactions that fail to reduce the addtionally constrained virus optima below 90% are discarded from the analysis. This value is used for either (…
• For this analysis, the threshold value was set at 0.95

## Sheet: CHIKV
Model Reaction ID	Average Media Analysis Normalised Virus Optima	S.D. Media Analysis Normalised Virus Optima	Average Point Mutation Analysis Normalised Virus Optima	S.D. Point Mutation Analysis Normalised Virus Optima	Average Random Mutation Analysis Normalised Virus Optima	S.D. Random Mutation Analysis Normalised Virus Optima	Reaction Frequency Media Analysis	Reaction Frequency Point Mutation Analysis	Reaction Frequency Random Mutation Analysis	Reaction Frequency Media Analysis (% Total Cases)	Reaction Frequency Point Mutation Analysis (% Total Cases)	Reaction Frequency Random Mutation Analysis (% Total Cases)	Identified by Unaltered Host-Derived Enforcement Analysis	Mutation Conditions Present In
'10FTHF5GLUtl'	0.992823	0.0596155	1	1	0.998249	0.0119653	3	0	12	1.43541	0	1.2	0	Random Only
'10FTHF5GLUtm'	0.992823	0.0596155	1	1	0.998249	0.0119653	3	0	12	1.43541	0	1.2	0	Random Only
'10FTHF6GLUtl'	0.992823	0.0596155	1	1	0.998249	0.0119653	3	0	12	1.43541	0	1.2	0	Random Only
'10FTHF6GLUtm'	0.992823	0.0596155	1	1	0.998249	0.0119653	3	0	12	1.43541	0	1.2	0	Random Only
'10FTHF7GLUtl'	0.992823	0.0596155	1	1	0.998249	0.0119653	3	0	12	1.43541	0	1.2	0	Random Only
'10FTHF7GLUtm'	0.992823	0.0596155	1	1	0.998249	0.0119653	3	0	12	1.43541	0	1.2	0	Random Only
'10FTHFtl'	0.992823	0.0596155	1	1	0.998249	0.0119653	3	0	12	1.43541	0	1.2	0	Random Only
'10FTHFtm'	0.992823	0.0596155	1	1	0.998249	0.0119653	3	0	12	1.43541	0	1.2	0	Random Only
'13DAMPPOX'	1	1	1	1	0.998249	0.0119653	0	0	12	0	0	1.2	0	Random Only
'1MNCAMti'	1	1	1	1	0.998249	0.0119653	0	0	12	0	0	1.2	0	Random Only
'1a,24,25VITD2Hm'	1	1	1	1	0.998249	0.0119653	0	0	12	0	0	1.2	0	Random Only
'1a,24,25VITD3Hm'	1	1	1	1	0.998249	0.0119653	0	0	12	0	0	1.2	0	Random Only
'1a,25VITD2Hm'	1	1	1	1	0.998249	0.0119653	0	0	12	0	0	1.2	0	Random Only
'1a,25VITD3Hm'	1	1	1	1	0.998249	0.0119653	0	0	12	0	0	1.2	0	Random Only
'24,25DHVITD2t'	1	1	1	1	0.998249	0.0119653	0	0	12	0	0	1.2	0	Random Only
'24,25DHVITD2tm'	1	1	1	1	0.998249	0.0119653	0	0	12	0	0	1.2	0	Random Only
'24,25DHVITD3t'	0.993164	0.0567838	1	1	0.998249	0.0119653	3	0	12	1.43541	0	1.2	0	Random Only
'24,25DHVITD3tm'	0.993164	0.0567838	1	1	0.998249	0.0119653	3	0	12	1.43541	0	1.2	0	Random Only
'24,25VITD2Hm'	1	1	1	1	0.998249	0.0119653	0	0	12	0	0	1.2	0	Random Only
'24,25VITD3Hm'	0.993164	0.0567838	1	1	0.998249	0.0119653	3	0	12	1.43541	0	1.2	0	Random Only
'24NPHte'	1	1	1	1	0.998249	0.0119653	0	0	12	0	0	1.2	0	Random Only
'25HVITD2t'	1	1	1	1	0.998249	0.0119653	0	0	12	0	0	1.2	0	Random Only
'25HVITD2tin'	1	1	1	1	0.998249	0.0119653	0	0	12	0	0	1.2	0	Random Only
'25HVITD2tin-m'	1	1	1	1	0.998249	0.0119653	0	0	12	0	0	1.2	0	Random Only
'25HVITD2tm'	1	1	1	1	0.998249	0.0119653	0	0	12	0	0	1.2	0	Random Only
'25HVITD3t'	1	1	1	1	0.998249	0.0119653	0	0	12	0	0	1.2	0	Random Only
'25HVITD3tin'	1	1	1	1	0.998249	0.0119653	0	0	12	0	0	1.2	0	Random Only
'25HVITD3tin-m'	1	1	1	1	0.998249	0.0119653	0	0	12	0	0	1.2	0	Random Only
'25HVITD3tm'	1	1	1	1	0.998249	0.0119653	0	0	12	0	0	1.2	0	Random Only
'25VITD2Hm'	1	1	1	1	0.998249	0.0119653	0	0	12	0	0	1.2	0	Random Only
'25VITD3Hm'	1	1	1	1	0.998249	0.0119653	0	0	12	0	0	1.2	0	Random Only
'2DR1PP'	0.99299	0.0582317	1	1	0.998249	0.0119653	3	0	12	1.43541	0	1.2	0	Random Only
'2HBO'	0.961175	0.067255	1	1	0.98173	0.0254134	34	0	131	16.2679	0	13.1	1	Random Only
'2HBt2'	0.961175	0.067255	1	1	0.98173	0.0254134	34	0	131	16.2679	0	13.1	1	Random Only
'2HCO3_NAt'	1	1	1	1	0.998249	0.0119653	0	0	12	0	0	1.2	0	Random Only
'2MCITt'	0.961175	0.067255	1	1	0.98173	0.0254134	34	0	131	16.2679	0	13.1	1	Random Only
'2OXOADOXm'	1	1	1	1	0.998249	0.0119653	0	0	12	0	0	1.2	0	Random Only
'2OXOADPTm'	1	1	1	1	0.998249	0.0119653	0	0	12	0	0	1.2	0	Random Only
'34DHPHAMT'	1	1	1	1	0.998249	0.0119653	0	0	12	0	0	1.2	0	Random Only
'34DHPLACOX'	1	1	1	1	0.998249	0.0119653	0	0	12	0	0	1.2	0	Random Only
'34DHPLACOX(NADP)'	1	1	1	1	0.998249	0.0119653	0	0	12	0	0	1.2	0	Random Only
'34HPLFM'	1	1	1	1	0.998249	0.0119653	0	0	12	0	0	1.2	0	Random Only
'35CGMPtn'	0.992823	0.0596155	1	1	0.998249	0.0119653	3	0	12	1.43541	0	1.2	0	Random Only
'3AIBTm'	0.955927	0.0670616	1	1	0.99084	0.0167433	32	0	12	15.311	0	1.2	0	Random Only
'3AIBt'	0.955927	0.0670616	1	1	0.99084	0.0167433	32	0	12	15.311	0	1.2	0	Random Only
'3AIBtm'	0.955927	0.0670616	1	1	0.99084	0.0167433	32	0	12	15.311	0	1.2	0	Random Only
'3DPHBH1'	1	1	1	1	0.998249	0.0119653	0	0	12	0	0	1.2	0	Random Only
'3DPHBH2'	1	1	1	1	0.998249	0.0119653	0	0	12	0	0	1.2	0	Random Only
'3DSPHR'	0.988735	0.0615659	1	1	0.998125	0.0122504	6	0	13	2.87081	0	1.3	0	Random Only
'3HAO'	1	1	1	1	0.998249	0.0119653	0	0	12	0	0	1.2	0	Random Only
'3HBCDm'	1	1	1	1	0.998249	0.0119653	0	0	12	0	0	1.2	0	Random Only
'3HBCOAHLm'	0.95002	0.0700031	1	1	0.99084	0.0167433	41	0	12	19.6172	0	1.2	0	Random Only
'3HCO3_NAt'	1	1	1	1	0.998249	0.0119653	0	0	12	0	0	1.2	0	Random Only
'3HLYTCL'	1	1	1	1	0.998249	0.0119653	0	0	12	0	0	1.2	0	Random Only
'3HPCOAHYD'	1	1	1	1	0.998249	0.0119653	0	0	12	0	0	1.2	0	Random Only
'3HXKYNDCL'	1	1	1	1	0.998249	0.0119653	0	0	12	0	0	1.2	0	Random Only
'3HXKYNOXDA'	1	1	1	1	0.998249	0.0119653	0	0	12	0	0	1.2	0	Random Only
'3M4HDXPAC'	1	1	1	1	0.998249	0.0119653	0	0	12	0	0	1.2	0	Random Only
'3MLDAt'	0.980052	0.068395	1	1	0.937575	0.0481148	29	0	555	13.8756	0	55.5	0	Random Only
'3MOBt2im'	1	1	1	1	0.998249	0.0119653	0	0	12	0	0	1.2	0	Random Only
'3MOPt2im'	1	1	1	1	0.998249	0.0119653	0	0	12	0	0	1.2	0	Random Only
'3MOX4HOXPGALDOX'	1	1	1	1	0.998249	0.0119653	0	0	12	0	0	1.2	0	Random Only
'3MOX4HOXPGALDOX(NADP)'	1	1	1	1	0.998249	0.0119653	0	0	12	0	0	1.2	0	Random Only
'3MOXTYROX'	1	1	1	1	0.998249	0.0119653	0	0	12	0	0	1.2	0	Random Only
'3NTD7l'	1	1	1	1	0.998249	0.0119653	0	0	12	0	0	1.2	0	Random Only
'3SALAASPm'	1	1	1	1	0.998249	0.0119653	0	0	12	0	0	1.2	0	Random Only
'3SALATAi'	1	1	1	1	0.998249	0.0119653	0	0	12	0	0	1.2	0	Random Only
'3SALATAim'	1	1	1	1	0.998249	0.0119653	0	0	12	0	0	1.2	0	Random Only
'41R1H2MAE12BOOX'	1	1	1	1	0.998249	0.0119653	0	0	12	0	0	1.2	0	Random Only
'41R2A1H12BOOX'	1	1	1	1	0.998249	0.0119653	0	0	12	0	0	1.2	0	Random Only
'42A12BOOX'	1	1	1	1	0.998249	0.0119653	0	0	12	0	0	1.2	0	Random Only
'4ABUTtm'	0.994156	0.0484655	1	1	0.998249	0.0119653	3	0	12	1.43541	0	1.2	0	Random Only
'4HBZCOAFm'	1	1	1	1	0.998249	0.0119653	0	0	12	0	0	1.2	0	Random Only
'4HBZFm'	1	1	1	1	0.998249	0.0119653	0	0	12	0	0	1.2	0	Random Only
'4HDEBRISOQUINEte'	1	1	1	1	0.998249	0.0119653	0	0	12	0	0	1.2	0	Random Only
'4HGLSDm'	1	1	1	1	0.998249	0.0119653	0	0	12	0	0	1.2	0	Random Only
'4HOXPACDOX(NADP)'	0.99058	0.0622375	1	1	0.998249	0.0119653	6	0	12	2.87081	0	1.2	0	Random Only
'4MOPt2im'	1	1	1	1	0.998249	0.0119653	0	0	12	0	0	1.2	0	Random Only
'4MPTNLte'	1	1	1	1	0.998249	0.0119653	0	0	12	0	0	1.2	0	Random Only
'4MPTNLtm'	1	1	1	1	0.998249	0.0119653	0	0	12	0	0	1.2	0	Random Only
'4MPTNLtr'	1	1	1	1	0.998249	0.0119653	0	0	12	0	0	1.2	0	Random Only
'4NPHSFte'	1	1	1	1	0.998249	0.0119653	0	0	12	0	0	1.2	0	Random Only
'4NPHSULT'	1	1	1	1	0.998249	0.0119653	0	0	12	0	0	1.2	0	Random Only
'4NPHte'	1	1	1	1	0.998249	0.0119653	0	0	12	0	0	1.2	0	Random Only
'4PYRDX'	1	1	1	1	0.998249	0.0119653	0	0	12	0	0	1.2	0	Random Only
'5ADTSTSTERONEGLCte'	1	1	1	1	0.998249	0.0119653	0	0	12	0	0	1.2	0	Random Only
'5ADTSTSTERONEGLCtr'	1	1	1	1	0.998249	0.0119653	0	0	12	0	0	1.2	0	Random Only
'5ADTSTSTERONEte'	1	1	1	1	0.998249	0.0119653	0	0	12	0	0	1.2	0	Random Only
'5ADTSTSTERONEtr'	1	1	1	1	0.998249	0.0119653	0	0	12	0	0	1.2	0	Random Only
'5DHFtl'	0.992823	0.0596155	1	1	0.998249	0.0119653	3	0	12	1.43541	0	1.2	0	Random Only
'5FTHFt2'	1	1	1	1	0.998249	0.0119653	0	0	12	0	0	1.2	0	Random Only
'5HLTDL'	0.9909	0.0618087	1	1	0.793342	0.0994563	6	0	883	2.87081	0	88.3	1	Random Only
'5HOXINDACTO2OX'	1	1	1	1	0.998249	0.0119653	0	0	12	0	0	1.2	0	Random Only
'5HOXINDACTOX'	1	1	1	1	0.998249	0.0119653	0	0	12	0	0	1.2	0	Random Only
'5HOXINDACTOXm'	1	1	1	1	0.998249	0.0119653	0	0	12	0	0	1.2	0	Random Only
'5HOXINOXDA'	1	1	1	1	0.998249	0.0119653	0	0	12	0	0	1.2	0	Random Only
'5HTRPDOX'	1	1	1	1	0.998249	0.0119653	0	0	12	0	0	1.2	0	Random Only
'5HTRPVESSEC'	0.9909	0.0618087	1	1	0.793342	0.0994563	6	0	883	2.87081	0	88.3	1	Random Only
'5HXKYNDCL'	1	1	1	1	0.998249	0.0119653	0	0	12	0	0	1.2	0	Random Only
'5HXKYNOXDA'	1	1	1	1	0.998249	0.0119653	0	0	12	0	0	1.2	0	Random Only
'5MTHFt'	1	1	1	1	0.998249	0.0119653	0	0	12	0	0	1.2	0	Random Only
'5MTHFt2'	1	1	1	1	0.998249	0.0119653	0	0	12	0	0	1.2	0	Random Only
'5THFtl'	0.992823	0.0596155	1	1	0.998249	0.0119653	3	0	12	1.43541	0	1.2	0	Random Only
'5THFtm'	0.992823	0.0596155	1	1	0.998249	0.0119653	3	0	12	1.43541	0	1.2	0	Random Only
'6DHFtl'	0.992823	0.0596155	1	1	0.998249	0.0119653	3	0	12	1.43541	0	1.2	0	Random Only
'6DHFtm'	0.992823	0.0596155	1	1	0.998249	0.0119653	3	0	12	1.43541	0	1.2	0	Random Only
'6HTSTSTERONEte'	1	1	1	1	0.998249	0.0119653	0	0	12	0	0	1.2	0	Random Only
'6THFtl'	0.992823	0.0596155	1	1	0.998249	0.0119653	3	0	12	1.43541	0	1.2	0	Random Only
'6THFtm'	0.992823	0.0596155	1	1	0.998249	0.0119653	3	0	12	1.43541	0	1.2	0	Random Only
'7DHCHSTEROLtr'	0.993138	0.0570007	1	1	0.998249	0.0119653	3	0	12	1.43541	0	1.2	0	Random Only
'7DHFtl'	0.992823	0.0596155	1	1	0.998249	0.0119653	3	0	12	1.43541	0	1.2	0	Random Only
'7DHFtm'	0.992823	0.0596155	1	1	0.998249	0.0119653	3	0	12	1.43541	0	1.2	0	Random Only
'7THFtl'	0.992823	0.0596155	1	1	0.998249	0.0119653	3	0	12	1.43541	0	1.2	0	Random Only
'7THFtm'	0.992823	0.0596155	1	1	0.998249	0.0119653	3	0	12	1.43541	0	1.2	0	Random Only
'A4GALTc'	1	1	1	1	0.998249	0.0119653	0	0	12	0	0	1.2	0	Random Only
'A4GALTg'	1	1	1	1	0.998249	0.0119653	0	0	12	0	0	1.2	0	Random Only
'AACOAT'	0.992823	0.0596155	1	1	0.998249	0.0119653	3	0	12	1.43541	0	1.2	0	Random Only
'ABO1g'	1	1	1	1	0.998249	0.0119653	0	0	12	0	0	1.2	0	Random Only
'ABO2g'	1	1	1	1	0.998249	0.0119653	0	0	12	0	0	1.2	0	Random Only
'ABO3g'	1	1	1	1	0.998249	0.0119653	0	0	12	0	0	1.2	0	Random Only
'ABO4g'	1	1	1	1	0.998249	0.0119653	0	0	12	0	0	1.2	0	Random Only
'ABO5g'	1	1	1	1	0.998249	0.0119653	0	0	12	0	0	1.2	0	Random Only
'ABO6g'	1	1	1	1	0.998249	0.0119653	0	0	12	0	0	1.2	0	Random Only
'ABO7g'	1	1	1	1	0.998249	0.0119653	0	0	12	0	0	1.2	0	Random Only
'ABO8g'	1	1	1	1	0.998249	0.0119653	0	0	12	0	0	1.2	0	Random Only
'ABO9g'	1	1	1	1	0.998249	0.0119653	0	0	12	0	0	1.2	0	Random Only
'ABTArm'	0.994156	0.0484655	1	1	0.998249	0.0119653	3	0	12	1.43541	0	1.2	0	Random Only
'ABTD'	0.9934	0.0548234	1	1	0.998249	0.0119653	3	0	12	1.43541	0	1.2	0	Random Only
'ABTti'	0.9934	0.0548234	1	1	0.998249	0.0119653	3	0	12	1.43541	0	1.2	0	Random Only
'ABUTD'	0.9931	0.0564481	1	1	0.998249	0.0119653	3	0	12	1.43541	0	1.2	0	Random Only
'ABUTt2r'	1	1	1	1	0.998249	0.0119653	0	0	12	0	0	1.2	0	Random Only
'ABUTt2rL'	1	1	1	1	0.998249	0.0119653	0	0	12	0	0	1.2	0	Random Only
'ABUTt4(2)r'	1	1	1	1	0.998249	0.0119653	0	0	12	0	0	1.2	0	Random Only
'ACACT1'	1	1	1	1	0.998249	0.0119653	0	0	12	0	0	1.2	0	Random Only
'ACACT10m'	1	1	1	1	0.998249	0.0119653	0	0	12	0	0	1.2	0	Random Only
'ACACT1r'	0.992823	0.0596155	1	1	0.998249	0.0119653	3	0	12	1.43541	0	1.2	0	Random Only
'ACACT1rm'	0.992823	0.0596155	1	1	0.998249	0.0119653	3	0	12	1.43541	0	1.2	0	Random Only
'ACACT1x'	1	1	1	1	0.998249	0.0119653	0	0	12	0	0	1.2	0	Random Only
'ACACT4p'	1	1	1	1	0.998249	0.0119653	0	0	12	0	0	1.2	0	Random Only
'ACACT5p'	1	1	1	1	0.998249	0.0119653	0	0	12	0	0	1.2	0	Random Only
'ACACT6p'	1	1	1	1	0.998249	0.0119653	0	0	12	0	0	1.2	0	Random Only
'ACACT7p'	1	1	1	1	0.998249	0.0119653	0	0	12	0	0	1.2	0	Random Only
'ACACT8p'	1	1	1	1	0.998249	0.0119653	0	0	12	0	0	1.2	0	Random Only
'ACACT9p'	1	1	1	1	0.998249	0.0119653	0	0	12	0	0	1.2	0	Random Only
'ACACt2'	0.992823	0.0596155	1	1	0.998249	0.0119653	3	0	12	1.43541	0	1.2	0	Random Only
'ACACt2m'	0.992682	0.0596158	1	1	0.998249	0.0119653	3	0	12	1.43541	0	1.2	0	Random Only
'ACACtx'	0.993594	0.0532156	1	1	0.998249	0.0119653	3	0	12	1.43541	0	1.2	0	Random Only
'ACALDt'	1	1	1	1	0.998249	0.0119653	0	0	12	0	0	1.2	0	Random Only
'ACALDtm'	1	1	1	1	0.998249	0.0119653	0	0	12	0	0	1.2	0	Random Only
'ACALDtr'	1	1	1	1	0.998249	0.0119653	0	0	12	0	0	1.2	0	Random Only
'ACALDtx'	1	1	1	1	0.998249	0.0119653	0	0	12	0	0	1.2	0	Random Only
'ACCOAC'	0.992823	0.0596155	1	1	0.998249	0.0119653	3	0	12	1.43541	0	1.2	0	Random Only
'ACCOACm'	0.992823	0.0596155	1	1	0.998249	0.0119653	3	0	12	1.43541	0	1.2	0	Random Only
'ACCOAL'	1	1	1	1	0.998249	0.0119653	0	0	12	0	0	1.2	0	Random Only
'ACCOALm'	1	1	1	1	0.998249	0.0119653	0	0	12	0	0	1.2	0	Random Only
'ACCOAgt'	1	1	1	1	0.998249	0.0119653	0	0	12	0	0	1.2	0	Random Only
'ACCOAtn'	1	1	1	1	0.998249	0.0119653	0	0	12	0	0	1.2	0	Random Only
'ACCOAtr'	1	1	1	1	0.998249	0.0119653	0	0	12	0	0	1.2	0	Random Only
'ACETONEt2'	0.992823	0.0596155	1	1	0.998249	0.0119653	3	0	12	1.43541	0	1.2	0	Random Only
'ACETONEt2m'	0.992823	0.0596155	1	1	0.998249	0.0119653	3	0	12	1.43541	0	1.2	0	Random Only
'ACGAGBSIDEtg'	1	1	1	1	0.998249	0.0119653	0	0	12	0	0	1.2	0	Random Only
'ACGAGBSIDEtl'	1	1	1	1	0.998249	0.0119653	0	0	12	0	0	1.2	0	Random Only
'ACGALFUCGALACGALFUC12GAL14ACGLCGALGLUSIDEte'	1	1	1	1	0.998249	0.0119653	0	0	12	0	0	1.2	0	Random Only
'ACGALFUCGALACGALFUC12GAL14ACGLCGALGLUSIDEtg'	1	1	1	1	0.998249	0.0119653	0	0	12	0	0	1.2	0	Random Only
'ACGALFUCGALACGALFUCGALACGLCGAL14ACGLCGALGLUSIDEte'	1	1	1	1	0.998249	0.0119653	0	0	12	0	0	1.2	0	Random Only
'ACGALFUCGALACGALFUCGALACGLCGAL14ACGLCGALGLUSIDEtg'	1	1	1	1	0.998249	0.0119653	0	0	12	0	0	1.2	0	Random Only
'ACGALtly'	1	1	1	1	0.998249	0.0119653	0	0	12	0	0	1.2	0	Random Only
'ACGAM2E'	1	1	1	1	0.998249	0.0119653	0	0	12	0	0	1.2	0	Random Only
'ACGAM6PSi'	0.993542	0.0536423	1	1	0.998249	0.0119653	3	0	12	1.43541	0	1.2	0	Random Only
'ACGAMK'	0.992823	0.0596155	1	1	0.998249	0.0119653	3	0	12	1.43541	0	1.2	0	Random Only
'ACGAMPM'	0.992823	0.0596155	1	1	0.998249	0.0119653	3	0	12	1.43541	0	1.2	0	Random Only
'ACGAMtly'	0.992823	0.0596155	1	1	0.998249	0.0119653	3	0	12	1.43541	0	1.2	0	Random Only
'ACGPID'	1	1	1	1	0.998249	0.0119653	0	0	12	0	0	1.2	0	Random Only
'ACHEe'	1	1	1	1	0.998249	0.0119653	0	0	12	0	0	1.2	0	Random Only
'ACHVESSEC'	1	1	1	1	0.998249	0.0119653	0	0	12	0	0	1.2	0	Random Only
'ACITL'	0.992823	0.0596155	1	1	0.998249	0.0119653	3	0	12	1.43541	0	1.2	0	Random Only
'ACN13ACNGALGBSIDEte'	1	1	1	1	0.998249	0.0119653	0	0	12	0	0	1.2	0	Random Only
'ACN13ACNGALGBSIDEtg'	1	1	1	1	0.998249	0.0119653	0	0	12	0	0	1.2	0	Random Only
'ACN23ACNGALGBSIDEte'	1	1	1	1	0.998249	0.0119653	0	0	12	0	0	1.2	0	Random Only
'ACN23ACNGALGBSIDEtg'	1	1	1	1	0.998249	0.0119653	0	0	12	0	0	1.2	0	Random Only
'ACNACNGAL14ACGLCGALGLUSIDEte'	1	1	1	1	0.998249	0.0119653	0	0	12	0	0	1.2	0	Random Only
'ACNACNGAL14ACGLCGALGLUSIDEtg'	1	1	1	1	0.998249	0.0119653	0	0	12	0	0	1.2	0	Random Only
'ACNACNGALGBSIDEte'	1	1	1	1	0.998249	0.0119653	0	0	12	0	0	1.2	0	Random Only
'ACNACNGALGBSIDEtg'	1	1	1	1	0.998249	0.0119653	0	0	12	0	0	1.2	0	Random Only
'ACNAM9PL'	0.9929	0.0589734	1	1	0.998249	0.0119653	3	0	12	1.43541	0	1.2	0	Random Only
'ACNAM9PL2'	0.993004	0.0581102	1	1	0.998249	0.0119653	3	0	12	1.43541	0	1.2	0	Random Only
'ACNAMPH'	0.9929	0.0589734	1	1	0.998249	0.0119653	3	0	12	1.43541	0	1.2	0	Random Only
'ACNAMlt'	0.992847	0.0594144	1	1	0.998249	0.0119653	3	0	12	1.43541	0	1.2	0	Random Only
'ACNAMtn'	0.992847	0.05942	1	1	0.998249	0.0119653	3	0	12	1.43541	0	1.2	0	Random Only
'ACNGALACGLCGAL14ACGLCGALGLUSIDEte'	1	1	1	1	0.998249	0.0119653	0	0	12	0	0	1.2	0	Random Only
'ACNGALACGLCGAL14ACGLCGALGLUSIDEtg'	1	1	1	1	0.998249	0.0119653	0	0	12	0	0	1.2	0	Random Only
'ACNMLr'	0.9929	0.0589734	1	1	0.998249	0.0119653	3	0	12	1.43541	0	1.2	0	Random Only
'ACOAD10m'	1	1	1	1	0.998249	0.0119653	0	0	12	0	0	1.2	0	Random Only
'ACOAD1fm'	1	1	1	1	0.998249	0.0119653	0	0	12	0	0	1.2	0	Random Only
'ACOAD8m'	0.992659	0.0596192	1	1	0.998249	0.0119653	3	0	12	1.43541	0	1.2	0	Random Only
'ACOAD9m'	0.950198	0.0700829	1	1	0.99084	0.0167433	41	0	12	19.6172	0	1.2	0	Random Only
'ACOAHi'	0.992823	0.0596155	1	1	0.998249	0.0119653	3	0	12	1.43541	0	1.2	0	Random Only
'ACOAO7p'	0.991807	0.0603876	1	1	0.998249	0.0119653	5	0	12	2.39234	0	1.2	0	Random Only
'ACOATA'	1	1	1	1	0.998249	0.0119653	0	0	12	0	0	1.2	0	Random Only
'ACODA'	1	1	1	1	0.998249	0.0119653	0	0	12	0	0	1.2	0	Random Only
'ACONT'	0.992916	0.0588415	1	1	0.998249	0.0119653	3	0	12	1.43541	0	1.2	0	Random Only
'ACONTm'	0.992473	0.0594464	1	1	0.998249	0.0119653	3	0	12	1.43541	0	1.2	0	Random Only
'ACOX22x'	1	1	1	1	0.998249	0.0119653	0	0	12	0	0	1.2	0	Random Only
'ACOX2x'	1	1	1	1	0.998249	0.0119653	0	0	12	0	0	1.2	0	Random Only
'ACP1(FMN)'	0.992823	0.0596155	1	1	0.998249	0.0119653	3	0	12	1.43541	0	1.2	0	Random Only
'ACRNtm'	0.992823	0.0596155	1	1	0.998249	0.0119653	3	0	12	1.43541	0	1.2	0	Random Only
'ACS'	0.992823	0.0596155	1	1	0.998249	0.0119653	3	0	12	1.43541	0	1.2	0	Random Only
'ACS2'	1	1	1	1	0.998249	0.0119653	0	0	12	0	0	1.2	0	Random Only
'ACSm'	0.992823	0.0596155	1	1	0.998249	0.0119653	3	0	12	1.43541	0	1.2	0	Random Only
'ACTLMO'	0.991807	0.0603876	1	1	0.998249	0.0119653	5	0	12	2.39234	0	1.2	0	Random Only
'ACTNMO'	0.994053	0.0494008	1	1	0.998249	0.0119653	3	0	12	1.43541	0	1.2	0	Random Only
'ACYP'	0.992823	0.0596155	1	1	0.998249	0.0119653	3	0	12	1.43541	0	1.2	0	Random Only
'ACt2m'	0.992823	0.0596155	1	1	0.998249	0.0119653	3	0	12	1.43541	0	1.2	0	Random Only
'ACt2r'	0.992823	0.0596155	1	1	0.998249	0.0119653	3	0	12	1.43541	0	1.2	0	Random Only
'ACtg'	1	1	1	1	0.998249	0.0119653	0	0	12	0	0	1.2	0	Random Only
'ADA'	0.992861	0.0593012	1	1	0.998249	0.0119653	3	0	12	1.43541	0	1.2	0	Random Only
'ADAe'	0.992861	0.0593012	1	1	0.998249	0.0119653	3	0	12	1.43541	0	1.2	0	Random Only
'ADCim'	0.992823	0.0596155	1	1	0.998249	0.0119653	3	0	12	1.43541	0	1.2	0	Random Only
'ADEt'	0.988598	0.0628024	1	1	0.997324	0.0139157	6	0	20	2.87081	0	2	0	Random Only
'ADEtl'	1	1	1	1	0.998249	0.0119653	0	0	12	0	0	1.2	0	Random Only
'ADHAPtx'	1	1	1	1	0.998249	0.0119653	0	0	12	0	0	1.2	0	Random Only
'ADK1'	1	1	1	1	0.998249	0.0119653	0	0	12	0	0	1.2	0	Random Only
'ADK1m'	1	1	1	1	0.998249	0.0119653	0	0	12	0	0	1.2	0	Random Only
'ADK3'	1	1	1	1	0.998249	0.0119653	0	0	12	0	0	1.2	0	Random Only
'ADK3m'	1	1	1	1	0.998249	0.0119653	0	0	12	0	0	1.2	0	Random Only
'ADKd'	0.988598	0.0628024	1	1	0.997757	0.0129674	6	0	15	2.87081	0	1.5	0	Random Only
'ADMDC'	1	1	1	1	0.998249	0.0119653	0	0	12	0	0	1.2	0	Random Only
'ADNCYC'	0.992823	0.0596155	1	1	0.998249	0.0119653	3	0	12	1.43541	0	1.2	0	Random Only
'ADNK1'	0.992823	0.0596155	1	1	0.998249	0.0119653	3	0	12	1.43541	0	1.2	0	Random Only
'ADNK1m'	0.991475	0.0562368	1	1	0.998223	0.0119909	6	0	12	2.87081	0	1.2	0	Random Only
'ADNt'	1	1	1	1	0.998249	0.0119653	0	0	12	0	0	1.2	0	Random Only
'ADNt4'	1	1	1	1	0.998249	0.0119653	0	0	12	0	0	1.2	0	Random Only
'ADNt5'	1	1	1	1	0.998249	0.0119653	0	0	12	0	0	1.2	0	Random Only
'ADNtl'	1	1	1	1	0.998249	0.0119653	0	0	12	0	0	1.2	0	Random Only
'ADNtm'	0.991475	0.0562368	1	1	0.998223	0.0119909	6	0	12	2.87081	0	1.2	0	Random Only
'ADPGLC'	1	1	1	1	0.998249	0.0119653	0	0	12	0	0	1.2	0	Random Only
'ADPMAN'	1	1	1	1	0.998249	0.0119653	0	0	12	0	0	1.2	0	Random Only
'ADPRDP'	0.992823	0.0596155	1	1	0.998249	0.0119653	3	0	12	1.43541	0	1.2	0	Random Only
'ADPRDPm'	1	1	1	1	0.998249	0.0119653	0	0	12	0	0	1.2	0	Random Only
'ADPRIBt'	1	1	1	1	0.998249	0.0119653	0	0	12	0	0	1.2	0	Random Only
'ADPT'	0.992823	0.0596155	1	1	0.998249	0.0119653	3	0	12	1.43541	0	1.2	0	Random Only
'ADPtx'	0.993138	0.0570007	1	1	0.998249	0.0119653	3	0	12	1.43541	0	1.2	0	Random Only
'ADRNCOAtx'	1	1	1	1	0.998249	0.0119653	0	0	12	0	0	1.2	0	Random Only
'ADRNCPT1'	1	1	1	1	0.998249	0.0119653	0	0	12	0	0	1.2	0	Random Only
'ADRNCPT2'	1	1	1	1	0.998249	0.0119653	0	0	12	0	0	1.2	0	Random Only
'ADRNCRNt'	1	1	1	1	0.998249	0.0119653	0	0	12	0	0	1.2	0	Random Only
'ADRNLPVESSEC'	1	1	1	1	0.998249	0.0119653	0	0	12	0	0	1.2	0	Random Only
'ADRNt'	1	1	1	1	0.998249	0.0119653	0	0	12	0	0	1.2	0	Random Only
'ADSELK'	1	1	1	1	0.998249	0.0119653	0	0	12	0	0	1.2	0	Random Only
'ADSK'	0.992823	0.0596155	1	1	0.998249	0.0119653	3	0	12	1.43541	0	1.2	0	Random Only
'ADSL1'	0.879189	0.0633766	0.891698	0.00141153	0.957799	0.0690687	198	6000	298	94.7368	100	29.8	1	Both
'ADSL2'	0.842772	0.0578369	0.859261	0.00128942	0.922873	0.0836344	209	6000	507	100	100	50.7	1	Both
'ADSS'	0.879189	0.0633766	0.891698	0.00141153	0.957799	0.0690687	198	6000	298	94.7368	100	29.8	1	Both
'AFLATOXINte'	1	1	1	1	0.998249	0.0119653	0	0	12	0	0	1.2	0	Random Only
'AG13T10g'	1	1	1	1	0.998249	0.0119653	0	0	12	0	0	1.2	0	Random Only
'AG13T11g'	1	1	1	1	0.998249	0.0119653	0	0	12	0	0	1.2	0	Random Only
'AG13T12g'	1	1	1	1	0.998249	0.0119653	0	0	12	0	0	1.2	0	Random Only
'AG13T13g'	1	1	1	1	0.998249	0.0119653	0	0	12	0	0	1.2	0	Random Only
'AG13T14g'	1	1	1	1	0.998249	0.0119653	0	0	12	0	0	1.2	0	Random Only
'AG13T15g'	1	1	1	1	0.998249	0.0119653	0	0	12	0	0	1.2	0	Random Only
'AG13T16g'	1	1	1	1	0.998249	0.0119653	0	0	12	0	0	1.2	0	Random Only
'AG13T17g'	1	1	1	1	0.998249	0.0119653	0	0	12	0	0	1.2	0	Random Only
'AG13T18g'	1	1	1	1	0.998249	0.0119653	0	0	12	0	0	1.2	0	Random Only
'AG13T1g'	0.992847	0.0594144	1	1	0.998249	0.0119653	3	0	12	1.43541	0	1.2	0	Random Only
'AG13T2g'	0.992847	0.0594144	1	1	0.998249	0.0119653	3	0	12	1.43541	0	1.2	0	Random Only
'AG13T3g'	0.992847	0.0594144	1	1	0.998249	0.0119653	3	0	12	1.43541	0	1.2	0	Random Only
'AG13T4g'	1	1	1	1	0.998249	0.0119653	0	0	12	0	0	1.2	0	Random Only
'AG13T5g'	1	1	1	1	0.998249	0.0119653	0	0	12	0	0	1.2	0	Random Only
'AG13T6g'	1	1	1	1	0.998249	0.0119653	0	0	12	0	0	1.2	0	Random Only
'AG13T7g'	1	1	1	1	0.998249	0.0119653	0	0	12	0	0	1.2	0	Random Only
'AG13T8g'	1	1	1	1	0.998249	0.0119653	0	0	12	0	0	1.2	0	Random Only
'AG13T9g'	1	1	1	1	0.998249	0.0119653	0	0	12	0	0	1.2	0	Random Only
'AGLPC'	1	1	1	1	0.998249	0.0119653	0	0	12	0	0	1.2	0	Random Only
'AGLPED'	1	1	1	1	0.998249	0.0119653	0	0	12	0	0	1.2	0	Random Only
'AGLPET'	1	1	1	1	0.998249	0.0119653	0	0	12	0	0	1.2	0	Random Only
'AGLPH'	1	1	1	1	0.998249	0.0119653	0	0	12	0	0	1.2	0	Random Only
'AGLPR'	1	1	1	1	0.998249	0.0119653	0	0	12	0	0	1.2	0	Random Only
'AGLPT'	1	1	1	1	0.998249	0.0119653	0	0	12	0	0	1.2	0	Random Only
'AGMTm'	1	1	1	1	0.998249	0.0119653	0	0	12	0	0	1.2	0	Random Only
'AGPAT1'	1	1	1	1	0.998249	0.0119653	0	0	12	0	0	1.2	0	Random Only
'AGPRim'	1	1	1	1	0.998249	0.0119653	0	0	12	0	0	1.2	0	Random Only
'AGPSx'	1	1	1	1	0.998249	0.0119653	0	0	12	0	0	1.2	0	Random Only
'AGPex'	1	1	1	1	0.998249	0.0119653	0	0	12	0	0	1.2	0	Random Only
'AHANDROSTANGLCte'	1	1	1	1	0.998249	0.0119653	0	0	12	0	0	1.2	0	Random Only
'AHANDROSTANGLCtr'	1	1	1	1	0.998249	0.0119653	0	0	12	0	0	1.2	0	Random Only
'AHC'	0.841117	0.0601552	0.85486	0.00234353	0.839361	0.0389689	206	6000	986	98.5646	100	98.6	1	Both
'AHCYStn'	1	1	1	1	0.998249	0.0119653	0	0	12	0	0	1.2	0	Random Only
'AHCYStr'	0.992929	0.0587258	1	1	0.998249	0.0119653	3	0	12	1.43541	0	1.2	0	Random Only
'AHEXASE2ly'	0.992823	0.0596155	1	1	0.998249	0.0119653	3	0	12	1.43541	0	1.2	0	Random Only
'AHEXASEly'	1	1	1	1	0.998249	0.0119653	0	0	12	0	0	1.2	0	Random Only
'AICART'	0.842772	0.0578369	0.859261	0.00128942	0.922873	0.0836344	209	6000	507	100	100	50.7	1	Both
'AIRCr'	0.842772	0.0578369	0.859261	0.00128942	0.922873	0.0836344	209	6000	507	100	100	50.7	1	Both
'AK2LGCHOLt'	0.992823	0.0596155	1	1	0.998249	0.0119653	3	0	12	1.43541	0	1.2	0	Random Only
'AKGDm'	0.992823	0.0596155	1	1	0.998249	0.0119653	3	0	12	1.43541	0	1.2	0	Random Only
'AKGMALtm'	0.992796	0.0596129	1	1	0.998249	0.0119653	3	0	12	1.43541	0	1.2	0	Random Only
'AKGt4_3'	0.992662	0.0596415	1	1	0.998249	0.0119653	3	0	12	1.43541	0	1.2	0	Random Only
'AKGtp'	1	1	1	1	0.998249	0.0119653	0	0	12	0	0	1.2	0	Random Only
'AKR1C41'	1	1	1	1	0.998249	0.0119653	0	0	12	0	0	1.2	0	Random Only
'AKR1C42'	1	1	1	1	0.998249	0.0119653	0	0	12	0	0	1.2	0	Random Only
'ALAASNNaEx'	1	1	1	1	0.998249	0.0119653	0	0	12	0	0	1.2	0	Random Only
'ALACYSNaEx'	1	1	1	1	0.998249	0.0119653	0	0	12	0	0	1.2	0	Random Only
'ALADGLNexR'	1	1	1	1	0.998249	0.0119653	0	0	12	0	0	1.2	0	Random Only
'ALADGLYexR'	1	1	1	1	0.998249	0.0119653	0	0	12	0	0	1.2	0	Random Only
'ALAGLNNaEx'	1	1	1	1	0.998249	0.0119653	0	0	12	0	0	1.2	0	Random Only
'ALAGLNexR'	1	1	1	1	0.998249	0.0119653	0	0	12	0	0	1.2	0	Random Only
'ALAGLYexR'	1	1	1	1	0.998249	0.0119653	0	0	12	0	0	1.2	0	Random Only
'ALAR'	0.982798	0.0659993	1	1	0.997787	0.0124208	23	0	13	11.0048	0	1.3	0	Random Only
'ALASERNaEx'	1	1	1	1	0.998249	0.0119653	0	0	12	0	0	1.2	0	Random Only
'ALASm'	1	1	1	1	0.998249	0.0119653	0	0	12	0	0	1.2	0	Random Only
'ALATA_L'	0.979204	0.0692159	1	1	0.997787	0.0124208	27	0	13	12.9187	0	1.3	0	Random Only
'ALATHRNaEx'	1	1	1	1	0.998249	0.0119653	0	0	12	0	0	1.2	0	Random Only
'ALAt2r'	1	1	1	1	0.998249	0.0119653	0	0	12	0	0	1.2	0	Random Only
'ALAt2rL'	1	1	1	1	0.998249	0.0119653	0	0	12	0	0	1.2	0	Random Only
'ALAt4'	1	1	1	1	0.998249	0.0119653	0	0	12	0	0	1.2	0	Random Only
'ALAtN1'	1	1	1	1	0.998249	0.0119653	0	0	12	0	0	1.2	0	Random Only
'ALCD1'	0.992632	0.0596243	1	1	0.998249	0.0119653	3	0	12	1.43541	0	1.2	0	Random Only
'ALCD21_D'	1	1	1	1	0.998249	0.0119653	0	0	12	0	0	1.2	0	Random Only
'ALCD21_L'	1	1	1	1	0.998249	0.0119653	0	0	12	0	0	1.2	0	Random Only
'ALCD22_D'	1	1	1	1	0.998249	0.0119653	0	0	12	0	0	1.2	0	Random Only
'ALCD22_L'	1	1	1	1	0.998249	0.0119653	0	0	12	0	0	1.2	0	Random Only
'ALCD2yf'	1	1	1	1	0.998249	0.0119653	0	0	12	0	0	1.2	0	Random Only
'ALDD20x'	1	1	1	1	0.998249	0.0119653	0	0	12	0	0	1.2	0	Random Only
'ALDD20xm'	1	1	1	1	0.998249	0.0119653	0	0	12	0	0	1.2	0	Random Only
'ALDD21'	1	1	1	1	0.998249	0.0119653	0	0	12	0	0	1.2	0	Random Only
'ALDD2x'	1	1	1	1	0.998249	0.0119653	0	0	12	0	0	1.2	0	Random Only
'ALDD2xm'	1	1	1	1	0.998249	0.0119653	0	0	12	0	0	1.2	0	Random Only
'ALDD2y'	1	1	1	1	0.998249	0.0119653	0	0	12	0	0	1.2	0	Random Only
'ALDSTRNte'	1	1	1	1	0.998249	0.0119653	0	0	12	0	0	1.2	0	Random Only
'ALKP'	1	1	1	1	0.998249	0.0119653	0	0	12	0	0	1.2	0	Random Only
'ALOX12'	1	1	1	1	0.998249	0.0119653	0	0	12	0	0	1.2	0	Random Only
'ALOX12R'	1	1	1	1	0.998249	0.0119653	0	0	12	0	0	1.2	0	Random Only
'ALOX15'	1	1	1	1	0.998249	0.0119653	0	0	12	0	0	1.2	0	Random Only
'ALOX5'	1	1	1	1	0.998249	0.0119653	0	0	12	0	0	1.2	0	Random Only
'ALOX52'	1	1	1	1	0.998249	0.0119653	0	0	12	0	0	1.2	0	Random Only
'ALR'	0.9929	0.0589734	1	1	0.998249	0.0119653	3	0	12	1.43541	0	1.2	0	Random Only
'ALR2'	1	1	1	1	0.998249	0.0119653	0	0	12	0	0	1.2	0	Random Only
'ALR3'	1	1	1	1	0.998249	0.0119653	0	0	12	0	0	1.2	0	Random Only
'AM6SAD'	1	1	1	1	0.998249	0.0119653	0	0	12	0	0	1.2	0	Random Only
'AMACR2p'	1	1	1	1	0.998249	0.0119653	0	0	12	0	0	1.2	0	Random Only
'AMACR2r'	1	1	1	1	0.998249	0.0119653	0	0	12	0	0	1.2	0	Random Only
'AMACRp'	1	1	1	1	0.998249	0.0119653	0	0	12	0	0	1.2	0	Random Only
'AMACRr'	1	1	1	1	0.998249	0.0119653	0	0	12	0	0	1.2	0	Random Only
'AMANK'	0.9929	0.0589734	1	1	0.998249	0.0119653	3	0	12	1.43541	0	1.2	0	Random Only
'AMCOXO'	1	1	1	1	0.998249	0.0119653	0	0	12	0	0	1.2	0	Random Only
'AMETr'	0.992929	0.0587258	1	1	0.998249	0.0119653	3	0	12	1.43541	0	1.2	0	Random Only
'AMETt2m'	0.992883	0.0591043	1	1	0.998249	0.0119653	3	0	12	1.43541	0	1.2	0	Random Only
'AMETtn'	1	1	1	1	0.998249	0.0119653	0	0	12	0	0	1.2	0	Random Only
'AMPDA'	0.992991	0.0582182	1	1	0.998249	0.0119653	3	0	12	1.43541	0	1.2	0	Random Only
'AMPTASECG'	0.992823	0.0596155	1	1	0.998249	0.0119653	3	0	12	1.43541	0	1.2	0	Random Only
'AMPTASECGe'	0.992823	0.0596155	1	1	0.998249	0.0119653	3	0	12	1.43541	0	1.2	0	Random Only
'AMPtp'	1	1	1	1	0.998249	0.0119653	0	0	12	0	0	1.2	0	Random Only
'AMPtr'	1	1	1	1	0.998249	0.0119653	0	0	12	0	0	1.2	0	Random Only
'AMY1e'	1	1	1	1	0.998249	0.0119653	0	0	12	0	0	1.2	0	Random Only
'AMY2e'	1	1	1	1	0.998249	0.0119653	0	0	12	0	0	1.2	0	Random Only
'ANDRSTRNGLCte'	1	1	1	1	0.998249	0.0119653	0	0	12	0	0	1.2	0	Random Only
'ANDRSTRNGLCtr'	1	1	1	1	0.998249	0.0119653	0	0	12	0	0	1.2	0	Random Only
'ANDRSTRNte'	1	1	1	1	0.998249	0.0119653	0	0	12	0	0	1.2	0	Random Only
'ANDRSTRNtr'	1	1	1	1	0.998249	0.0119653	0	0	12	0	0	1.2	0	Random Only
'AP4AH1'	1	1	1	1	0.998249	0.0119653	0	0	12	0	0	1.2	0	Random Only
'APAT2rm'	1	1	1	1	0.998249	0.0119653	0	0	12	0	0	1.2	0	Random Only
'APRTO2'	1	1	1	1	0.998249	0.0119653	0	0	12	0	0	1.2	0	Random Only
'AQCOBALt'	1	1	1	1	0.998249	0.0119653	0	0	12	0	0	1.2	0	Random Only
'ARAB-Lt'	1	1	1	1	0.998249	0.0119653	0	0	12	0	0	1.2	0	Random Only
'ARABR'	1	1	1	1	0.998249	0.0119653	0	0	12	0	0	1.2	0	Random Only
'ARACHCOAtx'	1	1	1	1	0.998249	0.0119653	0	0	12	0	0	1.2	0	Random Only
'ARACHCPT1'	1	1	1	1	0.998249	0.0119653	0	0	12	0	0	1.2	0	Random Only
'ARACHCPT2'	1	1	1	1	0.998249	0.0119653	0	0	12	0	0	1.2	0	Random Only
'ARACHCRNt'	1	1	1	1	0.998249	0.0119653	0	0	12	0	0	1.2	0	Random Only
'ARACHDCOAtx'	1	1	1	1	0.998249	0.0119653	0	0	12	0	0	1.2	0	Random Only
'ARACHDt2'	1	1	1	1	0.998249	0.0119653	0	0	12	0	0	1.2	0	Random Only
'ARACHDtr'	1	1	1	1	0.998249	0.0119653	0	0	12	0	0	1.2	0	Random Only
'ARACHt'	1	1	1	1	0.998249	0.0119653	0	0	12	0	0	1.2	0	Random Only
'ARGDCm'	1	1	1	1	0.998249	0.0119653	0	0	12	0	0	1.2	0	Random Only
'ARGLYSex'	1	1	1	1	0.998249	0.0119653	0	0	12	0	0	1.2	0	Random Only
'ARGN'	0.989548	0.0624709	1	1	0.997642	0.013119	6	0	15	2.87081	0	1.5	0	Random Only
'ARGNm'	0.989548	0.0624709	1	1	0.997642	0.013119	6	0	15	2.87081	0	1.5	0	Random Only
'ARGSL'	0.992145	0.0587715	1	1	0.998211	0.0120201	5	0	12	2.39234	0	1.2	0	Random Only
'ARGSS'	0.992145	0.0587715	1	1	0.998211	0.0120201	5	0	12	2.39234	0	1.2	0	Random Only
'ARGt4'	1	1	1	1	0.998249	0.0119653	0	0	12	0	0	1.2	0	Random Only
'ARGtiDF'	1	1	1	1	0.998249	0.0119653	0	0	12	0	0	1.2	0	Random Only
'ARGtm'	0.989548	0.0624709	1	1	0.997642	0.013119	6	0	15	2.87081	0	1.5	0	Random Only
'ARSA'	1	1	1	1	0.998249	0.0119653	0	0	12	0	0	1.2	0	Random Only
'ARTCOAL1'	0.994326	0.0492794	1	1	0.998249	0.0119653	3	0	12	1.43541	0	1.2	0	Random Only
'ARTCOAL2'	0.994326	0.0492794	1	1	0.998249	0.0119653	3	0	12	1.43541	0	1.2	0	Random Only
'ARTCOAL3'	0.994326	0.0492794	1	1	0.998249	0.0119653	3	0	12	1.43541	0	1.2	0	Random Only
'ARTFR11'	1	1	1	1	0.998249	0.0119653	0	0	12	0	0	1.2	0	Random Only
'ARTFR12'	0.991807	0.0603876	1	1	0.998249	0.0119653	5	0	12	2.39234	0	1.2	0	Random Only
'ARTFR13'	0.993105	0.0572785	1	1	0.998249	0.0119653	3	0	12	1.43541	0	1.2	0	Random Only
'ARTFR202'	1	1	1	1	0.998249	0.0119653	0	0	12	0	0	1.2	0	Random Only
'ARTFR203'	1	1	1	1	0.998249	0.0119653	0	0	12	0	0	1.2	0	Random Only
'ARTFR204'	1	1	1	1	0.998249	0.0119653	0	0	12	0	0	1.2	0	Random Only
'ARTFR205'	1	1	1	1	0.998249	0.0119653	0	0	12	0	0	1.2	0	Random Only
'ARTFR206'	1	1	1	1	0.998249	0.0119653	0	0	12	0	0	1.2	0	Random Only
'ARTFR207'	1	1	1	1	0.998249	0.0119653	0	0	12	0	0	1.2	0	Random Only
'ARTFR208'	1	1	1	1	0.998249	0.0119653	0	0	12	0	0	1.2	0	Random Only
'ARTFR209'	1	1	1	1	0.998249	0.0119653	0	0	12	0	0	1.2	0	Random Only
'ARTFR210'	1	1	1	1	0.998249	0.0119653	0	0	12	0	0	1.2	0	Random Only
'ARTFR211'	1	1	1	1	0.998249	0.0119653	0	0	12	0	0	1.2	0	Random Only
'ARTFR212'	1	1	1	1	0.998249	0.0119653	0	0	12	0	0	1.2	0	Random Only
'ARTFR213'	1	1	1	1	0.998249	0.0119653	0	0	12	0	0	1.2	0	Random Only
'ARTFR31'	0.993152	0.0568894	1	1	0.998249	0.0119653	3	0	12	1.43541	0	1.2	0	Random Only
'ARTFR32'	0.992987	0.0582552	1	1	0.998249	0.0119653	3	0	12	1.43541	0	1.2	0	Random Only
'ARTFR33'	0.993003	0.0581201	1	1	0.998249	0.0119653	3	0	12	1.43541	0	1.2	0	Random Only
'ARTFR34'	0.992939	0.0586551	1	1	0.998249	0.0119653	3	0	12	1.43541	0	1.2	0	Random Only
'ARTFR41'	0.991807	0.0603876	1	1	0.998249	0.0119653	5	0	12	2.39234	0	1.2	0	Random Only
'ARTFR42'	0.992987	0.0582552	1	1	0.998249	0.0119653	3	0	12	1.43541	0	1.2	0	Random Only
'ARTFR43'	0.993003	0.0581201	1	1	0.998249	0.0119653	3	0	12	1.43541	0	1.2	0	Random Only
'ARTFR44'	0.992939	0.0586551	1	1	0.998249	0.0119653	3	0	12	1.43541	0	1.2	0	Random Only
'ARTFR45'	1	1	1	1	0.998249	0.0119653	0	0	12	0	0	1.2	0	Random Only
'ARTFR46'	0.993003	0.0581201	1	1	0.998249	0.0119653	3	0	12	1.43541	0	1.2	0	Random Only
'ARTFR61'	0.991807	0.0603876	1	1	0.998249	0.0119653	5	0	12	2.39234	0	1.2	0	Random Only
'ARTPLM1'	0.9933	0.0556514	1	1	0.998249	0.0119653	3	0	12	1.43541	0	1.2	0	Random Only
'ARTPLM1m'	0.991404	0.0611793	1	1	0.998249	0.0119653	5	0	12	2.39234	0	1.2	0	Random Only
'ARTPLM2'	0.993304	0.0556693	1	1	0.998249	0.0119653	3	0	12	1.43541	0	1.2	0	Random Only
'ARTPLM2m'	0.991404	0.0611793	1	1	0.998249	0.0119653	5	0	12	2.39234	0	1.2	0	Random Only
'ARTPLM3'	0.993304	0.0556693	1	1	0.998249	0.0119653	3	0	12	1.43541	0	1.2	0	Random Only
'ARTPLM3m'	0.991404	0.0611793	1	1	0.998249	0.0119653	5	0	12	2.39234	0	1.2	0	Random Only
'ASAH1'	0.992867	0.0592492	1	1	0.998249	0.0119653	3	0	12	1.43541	0	1.2	0	Random Only
'ASCBOX'	0.992823	0.0596155	1	1	0.998249	0.0119653	3	0	12	1.43541	0	1.2	0	Random Only
'ASCBt'	1	1	1	1	0.998249	0.0119653	0	0	12	0	0	1.2	0	Random Only
'ASCBt4'	1	1	1	1	0.998249	0.0119653	0	0	12	0	0	1.2	0	Random Only
'ASNALANaEx'	1	1	1	1	0.998249	0.0119653	0	0	12	0	0	1.2	0	Random Only
'ASNCYSNaEx'	1	1	1	1	0.998249	0.0119653	0	0	12	0	0	1.2	0	Random Only
'ASNGLNNaEx'	1	1	1	1	0.998249	0.0119653	0	0	12	0	0	1.2	0	Random Only
'ASNNm'	0.992989	0.0582395	1	1	0.998249	0.0119653	3	0	12	1.43541	0	1.2	0	Random Only
'ASNS1'	0.978148	0.0708622	1	1	0.990594	0.0215806	31	0	63	14.8325	0	6.3	0	Random Only
'ASNSERNaEx'	1	1	1	1	0.998249	0.0119653	0	0	12	0	0	1.2	0	Random Only
'ASNTHRNaEx'	1	1	1	1	0.998249	0.0119653	0	0	12	0	0	1.2	0	Random Only
'ASNt4'	1	1	1	1	0.998249	0.0119653	0	0	12	0	0	1.2	0	Random Only
'ASNtN1'	1	1	1	1	0.998249	0.0119653	0	0	12	0	0	1.2	0	Random Only
'ASNtm'	0.992989	0.0582395	1	1	0.998249	0.0119653	3	0	12	1.43541	0	1.2	0	Random Only
'ASPCTr'	0.832189	0.0560512	0.848169	0.00124961	0.915032	0.0857812	209	6000	549	100	100	54.9	1	Both
'ASPDt6'	1	1	1	1	0.998249	0.0119653	0	0	12	0	0	1.2	0	Random Only
'ASPDxt'	1	1	1	1	0.998249	0.0119653	0	0	12	0	0	1.2	0	Random Only
'ASPGLUm'	0.992823	0.0596155	1	1	0.998249	0.0119653	3	0	12	1.43541	0	1.2	0	Random Only
'ASPTA'	0.992823	0.0596155	1	1	0.998249	0.0119653	3	0	12	1.43541	0	1.2	0	Random Only
'ASPTAm'	0.992823	0.0596155	1	1	0.998249	0.0119653	3	0	12	1.43541	0	1.2	0	Random Only
'ASPt6'	1	1	1	1	0.998249	0.0119653	0	0	12	0	0	1.2	0	Random Only
'ATP1ter'	1	1	1	1	0.998249	0.0119653	0	0	12	0	0	1.2	0	Random Only
'ATP2ter'	1	1	1	1	0.998249	0.0119653	0	0	12	0	0	1.2	0	Random Only
'ATPH1e'	1	1	1	1	0.998249	0.0119653	0	0	12	0	0	1.2	0	Random Only
'ATPH2e'	1	1	1	1	0.998249	0.0119653	0	0	12	0	0	1.2	0	Random Only
'ATPS4m'	0.992823	0.0596155	1	1	0.998249	0.0119653	3	0	12	1.43541	0	1.2	0	Random Only
'ATPasel'	0.992823	0.0596155	1	1	0.998249	0.0119653	3	0	12	1.43541	0	1.2	0	Random Only
'ATPtm'	1	1	1	1	0.998249	0.0119653	0	0	12	0	0	1.2	0	Random Only
'ATPtn'	0.992823	0.0596155	1	1	0.998249	0.0119653	3	0	12	1.43541	0	1.2	0	Random Only
'ATPtx'	0.993138	0.0570007	1	1	0.998249	0.0119653	3	0	12	1.43541	0	1.2	0	Random Only
'AVITE1t'	1	1	1	1	0.998249	0.0119653	0	0	12	0	0	1.2	0	Random Only
'AVITE2t'	1	1	1	1	0.998249	0.0119653	0	0	12	0	0	1.2	0	Random Only
'A_MANASE'	1	1	1	1	0.998249	0.0119653	0	0	12	0	0	1.2	0	Random Only
'A_MANASEly'	0.992823	0.0596155	1	1	0.998249	0.0119653	3	0	12	1.43541	0	1.2	0	Random Only
'Asn-X-Ser/Thrtr'	0.992823	0.0596155	1	1	0.998249	0.0119653	3	0	12	1.43541	0	1.2	0	Random Only
'B3GALT3g'	1	1	1	1	0.998249	0.0119653	0	0	12	0	0	1.2	0	Random Only
'B3GALT41g'	1	1	1	1	0.998249	0.0119653	0	0	12	0	0	1.2	0	Random Only
'B3GALT42g'	1	1	1	1	0.998249	0.0119653	0	0	12	0	0	1.2	0	Random Only
'B3GALT43g'	1	1	1	1	0.998249	0.0119653	0	0	12	0	0	1.2	0	Random Only
'B3GALT44g'	1	1	1	1	0.998249	0.0119653	0	0	12	0	0	1.2	0	Random Only
'B3GNT11g'	1	1	1	1	0.998249	0.0119653	0	0	12	0	0	1.2	0	Random Only
'B3GNT12g'	1	1	1	1	0.998249	0.0119653	0	0	12	0	0	1.2	0	Random Only
'B3GNT51g'	1	1	1	1	0.998249	0.0119653	0	0	12	0	0	1.2	0	Random Only
'BALAVECSEC'	1	1	1	1	0.998249	0.0119653	0	0	12	0	0	1.2	0	Random Only
'BALAtmr'	1	1	1	1	0.998249	0.0119653	0	0	12	0	0	1.2	0	Random Only
'BAMPPALDOX'	1	1	1	1	0.998249	0.0119653	0	0	12	0	0	1.2	0	Random Only
'BAMPPALDOXm'	1	1	1	1	0.998249	0.0119653	0	0	12	0	0	1.2	0	Random Only
'BBHOX'	1	1	1	1	0.998249	0.0119653	0	0	12	0	0	1.2	0	Random Only
'BDHm'	0.993215	0.0565495	1	1	0.998249	0.0119653	3	0	12	1.43541	0	1.2	0	Random Only
'BDMT_L'	0.992823	0.0596155	1	1	0.998249	0.0119653	3	0	12	1.43541	0	1.2	0	Random Only
'BDMT_U'	0.992823	0.0596155	1	1	0.998249	0.0119653	3	0	12	1.43541	0	1.2	0	Random Only
'BETALDHx'	1	1	1	1	0.998249	0.0119653	0	0	12	0	0	1.2	0	Random Only
'BETALDHxm'	0.992824	0.0596074	1	1	0.998249	0.0119653	3	0	12	1.43541	0	1.2	0	Random Only
'BHBt'	0.993215	0.0565495	1	1	0.998249	0.0119653	3	0	12	1.43541	0	1.2	0	Random Only
'BHBtm'	0.993215	0.0565495	1	1	0.998249	0.0119653	3	0	12	1.43541	0	1.2	0	Random Only
'BILDGLCURt'	0.992823	0.0596155	1	1	0.998249	0.0119653	3	0	12	1.43541	0	1.2	0	Random Only
'BILDGLCURte'	0.992823	0.0596155	1	1	0.998249	0.0119653	3	0	12	1.43541	0	1.2	0	Random Only
'BILDGLCURtr'	1	1	1	1	0.998249	0.0119653	0	0	12	0	0	1.2	0	Random Only
'BILGLCURt'	0.992823	0.0596155	1	1	0.998249	0.0119653	3	0	12	1.43541	0	1.2	0	Random Only
'BILGLCURte'	0.992823	0.0596155	1	1	0.998249	0.0119653	3	0	12	1.43541	0	1.2	0	Random Only
'BILGLCURtr'	1	1	1	1	0.998249	0.0119653	0	0	12	0	0	1.2	0	Random Only
'BILIRED'	1	1	1	1	0.998249	0.0119653	0	0	12	0	0	1.2	0	Random Only
'BILIRUBt2'	1	1	1	1	0.998249	0.0119653	0	0	12	0	0	1.2	0	Random Only
'BILIRUBtr'	1	1	1	1	0.998249	0.0119653	0	0	12	0	0	1.2	0	Random Only
'BIOCYTtn'	1	1	1	1	0.998249	0.0119653	0	0	12	0	0	1.2	0	Random Only
'BMTer_L'	1	1	1	1	0.998249	0.0119653	0	0	12	0	0	1.2	0	Random Only
'BMTer_U'	1	1	1	1	0.998249	0.0119653	0	0	12	0	0	1.2	0	Random Only
'BPNT'	0.992823	0.0596155	1	1	0.998249	0.0119653	3	0	12	1.43541	0	1.2	0	Random Only
'BPNT2'	0.992823	0.0596155	1	1	0.998249	0.0119653	3	0	12	1.43541	0	1.2	0	Random Only
'BTND1'	1	1	1	1	0.998249	0.0119653	0	0	12	0	0	1.2	0	Random Only
'BTND1n'	1	1	1	1	0.998249	0.0119653	0	0	12	0	0	1.2	0	Random Only
'BTNDe'	1	1	1	1	0.998249	0.0119653	0	0	12	0	0	1.2	0	Random Only
'BTNDm'	1	1	1	1	0.998249	0.0119653	0	0	12	0	0	1.2	0	Random Only
'BTNPL'	1	1	1	1	0.998249	0.0119653	0	0	12	0	0	1.2	0	Random Only
'BTNPLm'	1	1	1	1	0.998249	0.0119653	0	0	12	0	0	1.2	0	Random Only
'BTNt2'	1	1	1	1	0.998249	0.0119653	0	0	12	0	0	1.2	0	Random Only
'BTNt2m'	1	1	1	1	0.998249	0.0119653	0	0	12	0	0	1.2	0	Random Only
'BTNt3i'	0.992823	0.0596155	1	1	0.998249	0.0119653	3	0	12	1.43541	0	1.2	0	Random Only
'BTNt4i'	1	1	1	1	0.998249	0.0119653	0	0	12	0	0	1.2	0	Random Only
'BTNtn'	1	1	1	1	0.998249	0.0119653	0	0	12	0	0	1.2	0	Random Only
'BUTt2m'	1	1	1	1	0.998249	0.0119653	0	0	12	0	0	1.2	0	Random Only
'BUTt2r'	1	1	1	1	0.998249	0.0119653	0	0	12	0	0	1.2	0	Random Only
'BVITEt'	1	1	1	1	0.998249	0.0119653	0	0	12	0	0	1.2	0	Random Only
'BZt'	1	1	1	1	0.998249	0.0119653	0	0	12	0	0	1.2	0	Random Only
'BZtr'	1	1	1	1	0.998249	0.0119653	0	0	12	0	0	1.2	0	Random Only
'B_MANNASEly'	0.992823	0.0596155	1	1	0.998249	0.0119653	3	0	12	1.43541	0	1.2	0	Random Only
'C14STRr'	0.993138	0.0570007	1	1	0.998249	0.0119653	3	0	12	1.43541	0	1.2	0	Random Only
'C160CPT1'	1	1	1	1	0.998249	0.0119653	0	0	12	0	0	1.2	0	Random Only
'C160CPT2'	1	1	1	1	0.998249	0.0119653	0	0	12	0	0	1.2	0	Random Only
'C160CRNt'	1	1	1	1	0.998249	0.0119653	0	0	12	0	0	1.2	0	Random Only
'C161CPT1'	1	1	1	1	0.998249	0.0119653	0	0	12	0	0	1.2	0	Random Only
'C161CPT12'	1	1	1	1	0.998249	0.0119653	0	0	12	0	0	1.2	0	Random Only
'C161CPT2'	1	1	1	1	0.998249	0.0119653	0	0	12	0	0	1.2	0	Random Only
'C161CPT22'	1	1	1	1	0.998249	0.0119653	0	0	12	0	0	1.2	0	Random Only
'C161CRN2t'	1	1	1	1	0.998249	0.0119653	0	0	12	0	0	1.2	0	Random Only
'C161CRNt'	1	1	1	1	0.998249	0.0119653	0	0	12	0	0	1.2	0	Random Only
'C180CPT1'	0.991404	0.0611793	1	1	0.998249	0.0119653	5	0	12	2.39234	0	1.2	0	Random Only
'C180CPT2'	0.991404	0.0611793	1	1	0.998249	0.0119653	5	0	12	2.39234	0	1.2	0	Random Only
'C180CRNt'	0.991404	0.0611793	1	1	0.998249	0.0119653	5	0	12	2.39234	0	1.2	0	Random Only
'C181CPT1'	0.991408	0.0611693	1	1	0.998249	0.0119653	5	0	12	2.39234	0	1.2	0	Random Only
'C181CPT2'	0.991408	0.0611693	1	1	0.998249	0.0119653	5	0	12	2.39234	0	1.2	0	Random Only
'C181CRNt'	0.991408	0.0611693	1	1	0.998249	0.0119653	5	0	12	2.39234	0	1.2	0	Random Only
'C204CPT1'	1	1	1	1	0.998249	0.0119653	0	0	12	0	0	1.2	0	Random Only
'C204CPT2'	1	1	1	1	0.998249	0.0119653	0	0	12	0	0	1.2	0	Random Only
'C204CRNt'	1	1	1	1	0.998249	0.0119653	0	0	12	0	0	1.2	0	Random Only
'C226COAtx'	1	1	1	1	0.998249	0.0119653	0	0	12	0	0	1.2	0	Random Only
'C226CPT1'	1	1	1	1	0.998249	0.0119653	0	0	12	0	0	1.2	0	Random Only
'C226CPT2'	1	1	1	1	0.998249	0.0119653	0	0	12	0	0	1.2	0	Random Only
'C226CRNt'	1	1	1	1	0.998249	0.0119653	0	0	12	0	0	1.2	0	Random Only
'C2M26DCOAHLm'	1	1	1	1	0.998249	0.0119653	0	0	12	0	0	1.2	0	Random Only
'C2M26DCOAHLx'	1	1	1	1	0.998249	0.0119653	0	0	12	0	0	1.2	0	Random Only
'C3STDH1Pr'	0.993138	0.0570007	1	1	0.998249	0.0119653	3	0	12	1.43541	0	1.2	0	Random Only
'C3STDH1r'	0.993138	0.0570007	1	1	0.998249	0.0119653	3	0	12	1.43541	0	1.2	0	Random Only
'C3STKR2r'	0.993138	0.0570007	1	1	0.998249	0.0119653	3	0	12	1.43541	0	1.2	0	Random Only
'C4STMO1r'	0.993138	0.0570007	1	1	0.998249	0.0119653	3	0	12	1.43541	0	1.2	0	Random Only
'C4STMO2Pr'	0.993138	0.0570007	1	1	0.998249	0.0119653	3	0	12	1.43541	0	1.2	0	Random Only
'C4STMO2r'	0.993138	0.0570007	1	1	0.998249	0.0119653	3	0	12	1.43541	0	1.2	0	Random Only
'CAATPS'	0.992823	0.0596155	1	1	0.998249	0.0119653	3	0	12	1.43541	0	1.2	0	Random Only
'CAMPt'	0.988598	0.0628024	1	1	0.997354	0.0138473	6	0	19	2.87081	0	1.9	0	Random Only
'CAT2p'	1	1	1	1	0.998249	0.0119653	0	0	12	0	0	1.2	0	Random Only
'CATm'	0.992823	0.0596155	1	1	0.998249	0.0119653	3	0	12	1.43541	0	1.2	0	Random Only
'CATp'	0.992823	0.0596155	1	1	0.998249	0.0119653	3	0	12	1.43541	0	1.2	0	Random Only
'CAt7r'	1	1	1	1	0.998249	0.0119653	0	0	12	0	0	1.2	0	Random Only
'CBL2OR'	1	1	1	1	0.998249	0.0119653	0	0	12	0	0	1.2	0	Random Only
'CBL2tm'	1	1	1	1	0.998249	0.0119653	0	0	12	0	0	1.2	0	Random Only
'CBLATm'	1	1	1	1	0.998249	0.0119653	0	0	12	0	0	1.2	0	Random Only
'CBPPer'	1	1	1	1	0.998249	0.0119653	0	0	12	0	0	1.2	0	Random Only
'CBPS'	0.832189	0.0560512	0.848169	0.00124961	0.915032	0.0857812	209	6000	549	100	100	54.9	1	Both
'CBPSam'	0.988598	0.0628024	1	1	0.997324	0.0139157	6	0	20	2.87081	0	2	0	Random Only
'CBPter'	1	1	1	1	0.998249	0.0119653	0	0	12	0	0	1.2	0	Random Only
'CBR1'	1	1	1	1	0.998249	0.0119653	0	0	12	0	0	1.2	0	Random Only
'CBR2'	1	1	1	1	0.998249	0.0119653	0	0	12	0	0	1.2	0	Random Only
'CCA_D3t'	1	1	1	1	0.998249	0.0119653	0	0	12	0	0	1.2	0	Random Only
'CDIPTr'	0.992823	0.0596155	1	1	0.998249	0.0119653	3	0	12	1.43541	0	1.2	0	Random Only
'CDPDAGtm'	0.992882	0.0591128	1	1	0.998249	0.0119653	3	0	12	1.43541	0	1.2	0	Random Only
'CDS'	0.992823	0.0596155	1	1	0.998249	0.0119653	3	0	12	1.43541	0	1.2	0	Random Only
'CDSm'	0.992882	0.0591128	1	1	0.998249	0.0119653	3	0	12	1.43541	0	1.2	0	Random Only
'CEPTC'	0.992823	0.0596155	1	1	0.998249	0.0119653	3	0	12	1.43541	0	1.2	0	Random Only
'CEPTE'	0.992823	0.0596155	1	1	0.998249	0.0119653	3	0	12	1.43541	0	1.2	0	Random Only
'CERK'	0.994719	0.0451223	1	1	0.998223	0.0119909	3	0	12	1.43541	0	1.2	0	Random Only
'CERT1gt'	0.992823	0.0596155	1	1	0.998249	0.0119653	3	0	12	1.43541	0	1.2	0	Random Only
'CERT1rt'	0.992823	0.0596155	1	1	0.998249	0.0119653	3	0	12	1.43541	0	1.2	0	Random Only
'CERT2gt'	1	1	1	1	0.998249	0.0119653	0	0	12	0	0	1.2	0	Random Only
'CERT2rt'	0.992823	0.0596155	1	1	0.998249	0.0119653	3	0	12	1.43541	0	1.2	0	Random Only
'CGLYt3(2)'	0.992823	0.0596155	1	1	0.998249	0.0119653	3	0	12	1.43541	0	1.2	0	Random Only
'CGMPt'	0.988598	0.0628024	1	1	0.997566	0.0133636	6	0	15	2.87081	0	1.5	0	Random Only
'CHLP'	0.992823	0.0596155	1	1	0.998249	0.0119653	3	0	12	1.43541	0	1.2	0	Random Only
'CHLPCTD'	0.992823	0.0596155	1	1	0.998249	0.0119653	3	0	12	1.43541	0	1.2	0	Random Only
'CHLtm'	0.992823	0.0596073	1	1	0.998249	0.0119653	3	0	12	1.43541	0	1.2	0	Random Only
'CHOLATEt'	1	1	1	1	0.998249	0.0119653	0	0	12	0	0	1.2	0	Random Only
'CHOLATEt2'	1	1	1	1	0.998249	0.0119653	0	0	12	0	0	1.2	0	Random Only
'CHOLD2m'	0.992824	0.0596074	1	1	0.998249	0.0119653	3	0	12	1.43541	0	1.2	0	Random Only
'CHOLK'	0.992823	0.0596155	1	1	0.998249	0.0119653	3	0	12	1.43541	0	1.2	0	Random Only
'CHOLPtg'	0.992823	0.0596155	1	1	0.998249	0.0119653	3	0	12	1.43541	0	1.2	0	Random Only
'CHOLPtl'	0.992867	0.0592492	1	1	0.998249	0.0119653	3	0	12	1.43541	0	1.2	0	Random Only
'CHOLt4'	1	1	1	1	0.998249	0.0119653	0	0	12	0	0	1.2	0	Random Only
'CHOLtg'	0.992823	0.0596155	1	1	0.998249	0.0119653	3	0	12	1.43541	0	1.2	0	Random Only
'CHOLtn'	1	1	1	1	0.998249	0.0119653	0	0	12	0	0	1.2	0	Random Only
'CHOLtr'	0.992823	0.0596155	1	1	0.998249	0.0119653	3	0	12	1.43541	0	1.2	0	Random Only
'CHOLtu'	1	1	1	1	0.998249	0.0119653	0	0	12	0	0	1.2	0	Random Only
'CHSTEROLSULT'	0.992823	0.0596155	1	1	0.998249	0.0119653	3	0	12	1.43541	0	1.2	0	Random Only
'CHSTEROLt'	0.993135	0.057025	1	1	0.998249	0.0119653	3	0	12	1.43541	0	1.2	0	Random Only
'CHSTEROLt1'	1	1	1	1	0.998249	0.0119653	0	0	12	0	0	1.2	0	Random Only
'CHSTEROLt2'	0.993135	0.057025	1	1	0.998249	0.0119653	3	0	12	1.43541	0	1.2	0	Random Only
'CHSTEROLt3'	0.993135	0.057025	1	1	0.998249	0.0119653	3	0	12	1.43541	0	1.2	0	Random Only
'CHSTEROLtg'	1	1	1	1	0.998249	0.0119653	0	0	12	0	0	1.2	0	Random Only
'CHTNASE'	1	1	1	1	0.998249	0.0119653	0	0	12	0	0	1.2	0	Random Only
'CHTNASEe'	1	1	1	1	0.998249	0.0119653	0	0	12	0	0	1.2	0	Random Only
'CITL'	0.992823	0.0596155	1	1	0.998249	0.0119653	3	0	12	1.43541	0	1.2	0	Random Only
'CITRtm'	1	1	1	1	0.998249	0.0119653	0	0	12	0	0	1.2	0	Random Only
'CITt4_2'	1	1	1	1	0.998249	0.0119653	0	0	12	0	0	1.2	0	Random Only
'CITt4_4'	1	1	1	1	0.998249	0.0119653	0	0	12	0	0	1.2	0	Random Only
'CITtam'	0.993301	0.0556435	1	1	0.998249	0.0119653	3	0	12	1.43541	0	1.2	0	Random Only
'CITtbm'	0.990691	0.0620922	1	1	0.998245	0.0119654	6	0	12	2.87081	0	1.2	0	Random Only
'CK'	1	1	1	1	0.998249	0.0119653	0	0	12	0	0	1.2	0	Random Only
'CKc'	1	1	1	1	0.998249	0.0119653	0	0	12	0	0	1.2	0	Random Only
'CLFORtex'	0.993068	0.0575782	1	1	0.998249	0.0119653	3	0	12	1.43541	0	1.2	0	Random Only
'CLFORtex2'	0.993068	0.0575782	1	1	0.998249	0.0119653	3	0	12	1.43541	0	1.2	0	Random Only
'CLHCO3tex2'	1	1	1	1	0.998249	0.0119653	0	0	12	0	0	1.2	0	Random Only
'CLHCOtex'	1	1	1	1	0.998249	0.0119653	0	0	12	0	0	1.2	0	Random Only
'CLI2tex'	1	1	1	1	0.998249	0.0119653	0	0	12	0	0	1.2	0	Random Only
'CLOHtex2'	1	1	1	1	0.998249	0.0119653	0	0	12	0	0	1.2	0	Random Only
'CLOXAtex2'	1	1	1	1	0.998249	0.0119653	0	0	12	0	0	1.2	0	Random Only
'CLPNDCOAtx'	1	1	1	1	0.998249	0.0119653	0	0	12	0	0	1.2	0	Random Only
'CLPNDCPT1'	1	1	1	1	0.998249	0.0119653	0	0	12	0	0	1.2	0	Random Only
'CLPNDCPT2'	1	1	1	1	0.998249	0.0119653	0	0	12	0	0	1.2	0	Random Only
'CLPNDCRNt'	1	1	1	1	0.998249	0.0119653	0	0	12	0	0	1.2	0	Random Only
'CLPNDt'	1	1	1	1	0.998249	0.0119653	0	0	12	0	0	1.2	0	Random Only
'CLS_hs'	1	1	1	1	0.998249	0.0119653	0	0	12	0	0	1.2	0	Random Only
'CMPACNAtg'	0.992847	0.0594144	1	1	0.998249	0.0119653	3	0	12	1.43541	0	1.2	0	Random Only
'CMPACNAtn'	0.992847	0.05942	1	1	0.998249	0.0119653	3	0	12	1.43541	0	1.2	0	Random Only
'CMPSAS'	0.992847	0.0594144	1	1	0.998249	0.0119653	3	0	12	1.43541	0	1.2	0	Random Only
'CMPSASn'	0.992847	0.05942	1	1	0.998249	0.0119653	3	0	12	1.43541	0	1.2	0	Random Only
'CO2t'	0.993037	0.0578014	1	1	0.998249	0.0119653	3	0	12	1.43541	0	1.2	0	Random Only
'CO2ter'	0.993138	0.0570007	1	1	0.998249	0.0119653	3	0	12	1.43541	0	1.2	0	Random Only
'CO2tg'	1	1	1	1	0.998249	0.0119653	0	0	12	0	0	1.2	0	Random Only
'CO2tm'	0.992842	0.0594565	1	1	0.998249	0.0119653	3	0	12	1.43541	0	1.2	0	Random Only
'CO2tn'	1	1	1	1	0.998249	0.0119653	0	0	12	0	0	1.2	0	Random Only
'CO2tp'	0.993138	0.0570007	1	1	0.998249	0.0119653	3	0	12	1.43541	0	1.2	0	Random Only
'COAtg'	1	1	1	1	0.998249	0.0119653	0	0	12	0	0	1.2	0	Random Only
'COAtl'	1	1	1	1	0.998249	0.0119653	0	0	12	0	0	1.2	0	Random Only
'COAtm'	0.992823	0.0596155	1	1	0.998249	0.0119653	3	0	12	1.43541	0	1.2	0	Random Only
'COAtn'	1	1	1	1	0.998249	0.0119653	0	0	12	0	0	1.2	0	Random Only
'COAtp'	0.993594	0.0532156	1	1	0.998249	0.0119653	3	0	12	1.43541	0	1.2	0	Random Only
'COAtr'	1	1	1	1	0.998249	0.0119653	0	0	12	0	0	1.2	0	Random Only
'COKECBESr'	1	1	1	1	0.998249	0.0119653	0	0	12	0	0	1.2	0	Random Only
'COQ3m'	1	1	1	1	0.998249	0.0119653	0	0	12	0	0	1.2	0	Random Only
'COQ5m'	1	1	1	1	0.998249	0.0119653	0	0	12	0	0	1.2	0	Random Only
'COQ6m'	1	1	1	1	0.998249	0.0119653	0	0	12	0	0	1.2	0	Random Only
'COQ7m'	1	1	1	1	0.998249	0.0119653	0	0	12	0	0	1.2	0	Random Only
'CORE2GTg'	0.992847	0.0594144	1	1	0.998249	0.0119653	3	0	12	1.43541	0	1.2	0	Random Only
'CORE6GTg'	1	1	1	1	0.998249	0.0119653	0	0	12	0	0	1.2	0	Random Only
'COUCOAFm'	1	1	1	1	0.998249	0.0119653	0	0	12	0	0	1.2	0	Random Only
'COUMARINte'	1	1	1	1	0.998249	0.0119653	0	0	12	0	0	1.2	0	Random Only
'COt'	1	1	1	1	0.998249	0.0119653	0	0	12	0	0	1.2	0	Random Only
'CPCTDTX'	1	1	1	1	0.998249	0.0119653	0	0	12	0	0	1.2	0	Random Only
'CPPPGO'	1	1	1	1	0.998249	0.0119653	0	0	12	0	0	1.2	0	Random Only
'CREATt4(2)r'	0.989743	0.0624154	1	1	0.997709	0.0129864	6	0	15	2.87081	0	1.5	0	Random Only
'CREATtmdiffir'	1	1	1	1	0.998249	0.0119653	0	0	12	0	0	1.2	0	Random Only
'CRMPte'	0.994719	0.0451215	1	1	0.998223	0.0119909	3	0	12	1.43541	0	1.2	0	Random Only
'CRNCAR3tp'	1	1	1	1	0.998249	0.0119653	0	0	12	0	0	1.2	0	Random Only
'CRNCARtp'	0.993594	0.0532156	1	1	0.998249	0.0119653	3	0	12	1.43541	0	1.2	0	Random Only
'CRNt'	1	1	1	1	0.998249	0.0119653	0	0	12	0	0	1.2	0	Random Only
'CRNtHa'	1	1	1	1	0.998249	0.0119653	0	0	12	0	0	1.2	0	Random Only
'CRNtim'	0.992823	0.0596155	1	1	0.998249	0.0119653	3	0	12	1.43541	0	1.2	0	Random Only
'CRNtuIR'	1	1	1	1	0.998249	0.0119653	0	0	12	0	0	1.2	0	Random Only
'CRNtuNa'	1	1	1	1	0.998249	0.0119653	0	0	12	0	0	1.2	0	Random Only
'CRNtx'	1	1	1	1	0.998249	0.0119653	0	0	12	0	0	1.2	0	Random Only
'CRTSLt'	1	1	1	1	0.998249	0.0119653	0	0	12	0	0	1.2	0	Random Only
'CRTSLtm'	1	1	1	1	0.998249	0.0119653	0	0	12	0	0	1.2	0	Random Only
'CRTSLtr'	1	1	1	1	0.998249	0.0119653	0	0	12	0	0	1.2	0	Random Only
'CRTSTRNt'	1	1	1	1	0.998249	0.0119653	0	0	12	0	0	1.2	0	Random Only
'CRTSTRNtm'	1	1	1	1	0.998249	0.0119653	0	0	12	0	0	1.2	0	Random Only
'CRTSTRNtr'	1	1	1	1	0.998249	0.0119653	0	0	12	0	0	1.2	0	Random Only
'CRVNCtr'	1	1	1	1	0.998249	0.0119653	0	0	12	0	0	1.2	0	Random Only
'CSNAT'	1	1	1	1	0.998249	0.0119653	0	0	12	0	0	1.2	0	Random Only
'CSNAT2m'	1	1	1	1	0.998249	0.0119653	0	0	12	0	0	1.2	0	Random Only
'CSNAT2x'	1	1	1	1	0.998249	0.0119653	0	0	12	0	0	1.2	0	Random Only
'CSNAT3x'	1	1	1	1	0.998249	0.0119653	0	0	12	0	0	1.2	0	Random Only
'CSNATer'	1	1	1	1	0.998249	0.0119653	0	0	12	0	0	1.2	0	Random Only
'CSNATm'	0.992823	0.0596155	1	1	0.998249	0.0119653	3	0	12	1.43541	0	1.2	0	Random Only
'CSNATp'	0.993594	0.0532156	1	1	0.998249	0.0119653	3	0	12	1.43541	0	1.2	0	Random Only
'CSNATr'	0.992823	0.0596155	1	1	0.998249	0.0119653	3	0	12	1.43541	0	1.2	0	Random Only
'CSNt'	1	1	1	1	0.998249	0.0119653	0	0	12	0	0	1.2	0	Random Only
'CSPG_At'	1	1	1	1	0.998249	0.0119653	0	0	12	0	0	1.2	0	Random Only
'CSPG_Atly'	1	1	1	1	0.998249	0.0119653	0	0	12	0	0	1.2	0	Random Only
'CSPG_Bt'	1	1	1	1	0.998249	0.0119653	0	0	12	0	0	1.2	0	Random Only
'CSPG_Btly'	1	1	1	1	0.998249	0.0119653	0	0	12	0	0	1.2	0	Random Only
'CSPG_Ct'	1	1	1	1	0.998249	0.0119653	0	0	12	0	0	1.2	0	Random Only
'CSPG_Ctly'	1	1	1	1	0.998249	0.0119653	0	0	12	0	0	1.2	0	Random Only
'CSPG_Dt'	1	1	1	1	0.998249	0.0119653	0	0	12	0	0	1.2	0	Random Only
'CSPG_Dtly'	1	1	1	1	0.998249	0.0119653	0	0	12	0	0	1.2	0	Random Only
'CSPG_Et'	1	1	1	1	0.998249	0.0119653	0	0	12	0	0	1.2	0	Random Only
'CSPG_Etly'	1	1	1	1	0.998249	0.0119653	0	0	12	0	0	1.2	0	Random Only
'CSm'	0.992823	0.0596155	1	1	0.998249	0.0119653	3	0	12	1.43541	0	1.2	0	Random Only
'CTPS1'	0.73461	0.0448216	0.736175	0.00324903	0.780092	0.111528	209	6000	918	100	100	91.8	1	Both
'CTPS2'	1	1	1	1	0.998249	0.0119653	0	0	12	0	0	1.2	0	Random Only
'CTPtn'	0.992847	0.05942	1	1	0.998249	0.0119653	3	0	12	1.43541	0	1.2	0	Random Only
'CYANSTm'	1	1	1	1	0.998249	0.0119653	0	0	12	0	0	1.2	0	Random Only
'CYANt'	1	1	1	1	0.998249	0.0119653	0	0	12	0	0	1.2	0	Random Only
'CYANtm'	1	1	1	1	0.998249	0.0119653	0	0	12	0	0	1.2	0	Random Only
'CYOOm2'	0.992632	0.0596562	1	1	0.998249	0.0119653	3	0	12	1.43541	0	1.2	0	Random Only
'CYOOm3'	1	1	1	1	0.998249	0.0119653	0	0	12	0	0	1.2	0	Random Only
'CYOR-u10m'	0.955055	0.0942074	1	1	0.998249	0.0119653	48	0	12	22.9665	0	1.2	0	Random Only
'CYSALANaEx'	1	1	1	1	0.998249	0.0119653	0	0	12	0	0	1.2	0	Random Only
'CYSAMO'	0.926834	0.0665961	0.933214	0.00258756	0.867811	0.0316938	167	5999	990	79.9043	99.9833	99	0	Both
'CYSASNNaEx'	1	1	1	1	0.998249	0.0119653	0	0	12	0	0	1.2	0	Random Only
'CYSGLNNaEx'	1	1	1	1	0.998249	0.0119653	0	0	12	0	0	1.2	0	Random Only
'CYSGLUexR'	1	1	1	1	0.998249	0.0119653	0	0	12	0	0	1.2	0	Random Only
'CYSGLYex'	1	1	1	1	0.998249	0.0119653	0	0	12	0	0	1.2	0	Random Only
'CYSGLYexR'	1	1	1	1	0.998249	0.0119653	0	0	12	0	0	1.2	0	Random Only
'CYSSERNaEx'	1	1	1	1	0.998249	0.0119653	0	0	12	0	0	1.2	0	Random Only
'CYSTA'	0.924497	0.0658244	0.933214	0.00258756	0.867811	0.0316938	172	5999	990	82.2967	99.9833	99	0	Both
'CYSTAm'	1	1	1	1	0.998249	0.0119653	0	0	12	0	0	1.2	0	Random Only
'CYSTGL'	0.840919	0.0596617	0.85486	0.00234353	0.830735	0.0306358	206	6000	999	98.5646	100	99.9	1	Both
'CYSTGLUex'	1	1	1	1	0.998249	0.0119653	0	0	12	0	0	1.2	0	Random Only
'CYSTHRNaEx'	1	1	1	1	0.998249	0.0119653	0	0	12	0	0	1.2	0	Random Only
'CYSTS'	0.840919	0.0596617	0.85486	0.00234353	0.830735	0.0306358	206	6000	999	98.5646	100	99.9	1	Both
'CYSTSERex'	1	1	1	1	0.998249	0.0119653	0	0	12	0	0	1.2	0	Random Only
'CYSt4'	1	1	1	1	0.998249	0.0119653	0	0	12	0	0	1.2	0	Random Only
'CYStec'	1	1	1	1	0.998249	0.0119653	0	0	12	0	0	1.2	0	Random Only
'CYTD'	0.992823	0.0596155	1	1	0.998249	0.0119653	3	0	12	1.43541	0	1.2	0	Random Only
'CYTDK1'	0.992823	0.0596155	1	1	0.998249	0.0119653	3	0	12	1.43541	0	1.2	0	Random Only
'CYTDK2m'	0.992882	0.0591128	1	1	0.998249	0.0119653	3	0	12	1.43541	0	1.2	0	Random Only
'CYTDn'	0.992823	0.0596155	1	1	0.998249	0.0119653	3	0	12	1.43541	0	1.2	0	Random Only
'CYTDt'	1	1	1	1	0.998249	0.0119653	0	0	12	0	0	1.2	0	Random Only
'CYTDt4'	1	1	1	1	0.998249	0.0119653	0	0	12	0	0	1.2	0	Random Only
'CYTDt5'	1	1	1	1	0.998249	0.0119653	0	0	12	0	0	1.2	0	Random Only
'CYTDtl'	1	1	1	1	0.998249	0.0119653	0	0	12	0	0	1.2	0	Random Only
'CYTDtm'	0.992882	0.0591128	1	1	0.998249	0.0119653	3	0	12	1.43541	0	1.2	0	Random Only
'CYTDtn'	0.992823	0.0596155	1	1	0.998249	0.0119653	3	0	12	1.43541	0	1.2	0	Random Only
'CYTK1'	1	1	1	1	0.998249	0.0119653	0	0	12	0	0	1.2	0	Random Only
'CYTK10'	1	1	1	1	0.998249	0.0119653	0	0	12	0	0	1.2	0	Random Only
'CYTK10n'	1	1	1	1	0.998249	0.0119653	0	0	12	0	0	1.2	0	Random Only
'CYTK11'	1	1	1	1	0.998249	0.0119653	0	0	12	0	0	1.2	0	Random Only
'CYTK11n'	1	1	1	1	0.998249	0.0119653	0	0	12	0	0	1.2	0	Random Only
'CYTK12'	1	1	1	1	0.998249	0.0119653	0	0	12	0	0	1.2	0	Random Only
'CYTK12n'	1	1	1	1	0.998249	0.0119653	0	0	12	0	0	1.2	0	Random Only
'CYTK13'	1	1	1	1	0.998249	0.0119653	0	0	12	0	0	1.2	0	Random Only
'CYTK13n'	1	1	1	1	0.998249	0.0119653	0	0	12	0	0	1.2	0	Random Only
'CYTK14'	1	1	1	1	0.998249	0.0119653	0	0	12	0	0	1.2	0	Random Only
'CYTK14n'	1	1	1	1	0.998249	0.0119653	0	0	12	0	0	1.2	0	Random Only
'CYTK1m'	0.992882	0.0591128	1	1	0.998249	0.0119653	3	0	12	1.43541	0	1.2	0	Random Only
'CYTK1n'	1	1	1	1	0.998249	0.0119653	0	0	12	0	0	1.2	0	Random Only
'CYTK2'	1	1	1	1	0.998249	0.0119653	0	0	12	0	0	1.2	0	Random Only
'CYTK2n'	1	1	1	1	0.998249	0.0119653	0	0	12	0	0	1.2	0	Random Only
'CYTK3'	1	1	1	1	0.998249	0.0119653	0	0	12	0	0	1.2	0	Random Only
'CYTK3n'	1	1	1	1	0.998249	0.0119653	0	0	12	0	0	1.2	0	Random Only
'CYTK4'	1	1	1	1	0.998249	0.0119653	0	0	12	0	0	1.2	0	Random Only
'CYTK4n'	1	1	1	1	0.998249	0.0119653	0	0	12	0	0	1.2	0	Random Only
'CYTK5'	1	1	1	1	0.998249	0.0119653	0	0	12	0	0	1.2	0	Random Only
'CYTK5n'	1	1	1	1	0.998249	0.0119653	0	0	12	0	0	1.2	0	Random Only
'CYTK6'	1	1	1	1	0.998249	0.0119653	0	0	12	0	0	1.2	0	Random Only
'CYTK6n'	1	1	1	1	0.998249	0.0119653	0	0	12	0	0	1.2	0	Random Only
'CYTK7'	1	1	1	1	0.998249	0.0119653	0	0	12	0	0	1.2	0	Random Only
'CYTK7n'	1	1	1	1	0.998249	0.0119653	0	0	12	0	0	1.2	0	Random Only
'CYTK8'	1	1	1	1	0.998249	0.0119653	0	0	12	0	0	1.2	0	Random Only
'CYTK8n'	1	1	1	1	0.998249	0.0119653	0	0	12	0	0	1.2	0	Random Only
'CYTK9'	1	1	1	1	0.998249	0.0119653	0	0	12	0	0	1.2	0	Random Only
'CYTK9n'	1	1	1	1	0.998249	0.0119653	0	0	12	0	0	1.2	0	Random Only
'CytOxe-'	0.992823	0.0596155	1	1	0.998249	0.0119653	3	0	12	1.43541	0	1.2	0	Random Only
'D-LACt2'	0.993181	0.0566381	1	1	0.998249	0.0119653	3	0	12	1.43541	0	1.2	0	Random Only
'D-LACtm'	1	1	1	1	0.998249	0.0119653	0	0	12	0	0	1.2	0	Random Only
'DADA'	0.992861	0.0593012	1	1	0.998249	0.0119653	3	0	12	1.43541	0	1.2	0	Random Only
'DADAe'	0.992861	0.0593012	1	1	0.998249	0.0119653	3	0	12	1.43541	0	1.2	0	Random Only
'DADNK'	0.992823	0.0596155	1	1	0.998249	0.0119653	3	0	12	1.43541	0	1.2	0	Random Only
'DADNt4'	0.992861	0.0593012	1	1	0.998249	0.0119653	3	0	12	1.43541	0	1.2	0	Random Only
'DAGK_hs'	0.992823	0.0596155	1	1	0.998249	0.0119653	3	0	12	1.43541	0	1.2	0	Random Only
'DAGKn_hs'	1	1	1	1	0.998249	0.0119653	0	0	12	0	0	1.2	0	Random Only
'DAG_HSter'	1	1	1	1	0.998249	0.0119653	0	0	12	0	0	1.2	0	Random Only
'DAGt'	1	1	1	1	0.998249	0.0119653	0	0	12	0	0	1.2	0	Random Only
'DALAOXx'	0.983014	0.0660194	1	1	0.998249	0.0119653	23	0	12	11.0048	0	1.2	0	Random Only
'DALAt2r'	1	1	1	1	0.998249	0.0119653	0	0	12	0	0	1.2	0	Random Only
'DALAt2rL'	1	1	1	1	0.998249	0.0119653	0	0	12	0	0	1.2	0	Random Only
'DALAxt'	0.983014	0.0660194	1	1	0.998249	0.0119653	23	0	12	11.0048	0	1.2	0	Random Only
'DASCBH'	1	1	1	1	0.998249	0.0119653	0	0	12	0	0	1.2	0	Random Only
'DASCBR'	0.992823	0.0596155	1	1	0.998249	0.0119653	3	0	12	1.43541	0	1.2	0	Random Only
'DASPO1p'	1	1	1	1	0.998249	0.0119653	0	0	12	0	0	1.2	0	Random Only
'DATPtn'	0.988598	0.0628024	1	1	0.997757	0.0129674	6	0	15	2.87081	0	1.5	0	Random Only
'DCK1n'	1	1	1	1	0.998249	0.0119653	0	0	12	0	0	1.2	0	Random Only
'DCK2n'	1	1	1	1	0.998249	0.0119653	0	0	12	0	0	1.2	0	Random Only
'DCMPDA'	0.992823	0.0596155	1	1	0.998249	0.0119653	3	0	12	1.43541	0	1.2	0	Random Only
'DCSPTN1COAtx'	1	1	1	1	0.998249	0.0119653	0	0	12	0	0	1.2	0	Random Only
'DCSPTN1CPT1'	1	1	1	1	0.998249	0.0119653	0	0	12	0	0	1.2	0	Random Only
'DCSPTN1CPT2'	1	1	1	1	0.998249	0.0119653	0	0	12	0	0	1.2	0	Random Only
'DCSPTN1CRNt'	1	1	1	1	0.998249	0.0119653	0	0	12	0	0	1.2	0	Random Only
'DCSPTN1t'	1	1	1	1	0.998249	0.0119653	0	0	12	0	0	1.2	0	Random Only
'DCTPtn'	0.988598	0.0628024	1	1	0.998012	0.0124505	6	0	13	2.87081	0	1.3	0	Random Only
'DCYTD'	0.992823	0.0596155	1	1	0.998249	0.0119653	3	0	12	1.43541	0	1.2	0	Random Only
'DCYTt'	0.988598	0.0628024	1	1	0.99737	0.0138095	6	0	19	2.87081	0	1.9	0	Random Only
'DEBRISOQUINEt'	1	1	1	1	0.998249	0.0119653	0	0	12	0	0	1.2	0	Random Only
'DEDOLP1_L'	1	1	1	1	0.998249	0.0119653	0	0	12	0	0	1.2	0	Random Only
'DEDOLP1_U'	1	1	1	1	0.998249	0.0119653	0	0	12	0	0	1.2	0	Random Only
'DEDOLP2_L'	1	1	1	1	0.998249	0.0119653	0	0	12	0	0	1.2	0	Random Only
'DEDOLP2_U'	1	1	1	1	0.998249	0.0119653	0	0	12	0	0	1.2	0	Random Only
'DEDOLR_L'	1	1	1	1	0.998249	0.0119653	0	0	12	0	0	1.2	0	Random Only
'DEDOLR_U'	1	1	1	1	0.998249	0.0119653	0	0	12	0	0	1.2	0	Random Only
'DESAT16_2'	0.991796	0.0604061	1	1	0.998249	0.0119653	5	0	12	2.39234	0	1.2	0	Random Only
'DESAT18_10'	1	1	1	1	0.998249	0.0119653	0	0	12	0	0	1.2	0	Random Only
'DESAT18_3'	0.994104	0.0491429	1	1	0.998249	0.0119653	3	0	12	1.43541	0	1.2	0	Random Only
'DESAT18_4'	0.993994	0.0483121	1	1	0.998249	0.0119653	4	0	12	1.91388	0	1.2	0	Random Only
'DESAT18_5'	0.993994	0.0483121	1	1	0.998249	0.0119653	4	0	12	1.91388	0	1.2	0	Random Only
'DESAT18_6'	0.997688	0.0174476	1	1	0.998249	0.0119653	4	0	12	1.91388	0	1.2	0	Random Only
'DESAT18_7'	0.997395	0.0203551	1	1	0.998249	0.0119653	4	0	12	1.91388	0	1.2	0	Random Only
'DESAT18_8'	0.997395	0.0203551	1	1	0.998249	0.0119653	4	0	12	1.91388	0	1.2	0	Random Only
'DESAT18_9'	1	1	1	1	0.998249	0.0119653	0	0	12	0	0	1.2	0	Random Only
'DESAT20_1'	1	1	1	1	0.998249	0.0119653	0	0	12	0	0	1.2	0	Random Only
'DESAT20_2'	1	1	1	1	0.998249	0.0119653	0	0	12	0	0	1.2	0	Random Only
'DESAT22_1p'	1	1	1	1	0.998249	0.0119653	0	0	12	0	0	1.2	0	Random Only
'DESAT22_2p'	1	1	1	1	0.998249	0.0119653	0	0	12	0	0	1.2	0	Random Only
'DESAT24_1'	1	1	1	1	0.998249	0.0119653	0	0	12	0	0	1.2	0	Random Only
'DGAT'	1	1	1	1	0.998249	0.0119653	0	0	12	0	0	1.2	0	Random Only
'DGCHOLte'	1	1	1	1	0.998249	0.0119653	0	0	12	0	0	1.2	0	Random Only
'DGK1'	0.99299	0.0582317	1	1	0.998249	0.0119653	3	0	12	1.43541	0	1.2	0	Random Only
'DGK2m'	0.99148	0.0562282	1	1	0.998224	0.0119891	6	0	12	2.87081	0	1.2	0	Random Only
'DGNSKm'	0.99148	0.0562282	1	1	0.998224	0.0119891	6	0	12	2.87081	0	1.2	0	Random Only
'DGSNt'	0.988598	0.0628024	1	1	0.997324	0.0139157	6	0	20	2.87081	0	2	0	Random Only
'DGSNtm'	0.99148	0.0562282	1	1	0.998224	0.0119891	6	0	12	2.87081	0	1.2	0	Random Only
'DGTPtn'	0.988598	0.0628024	1	1	0.997347	0.0138629	6	0	19	2.87081	0	1.9	0	Random Only
'DGULND'	0.992823	0.0596155	1	1	0.998249	0.0119653	3	0	12	1.43541	0	1.2	0	Random Only
'DHAAt1r'	1	1	1	1	0.998249	0.0119653	0	0	12	0	0	1.2	0	Random Only
'DHAPA'	1	1	1	1	0.998249	0.0119653	0	0	12	0	0	1.2	0	Random Only
'DHAPAx'	1	1	1	1	0.998249	0.0119653	0	0	12	0	0	1.2	0	Random Only
'DHCHOLESTANATEtm'	1	1	1	1	0.998249	0.0119653	0	0	12	0	0	1.2	0	Random Only
'DHCR241r'	0.993138	0.0570007	1	1	0.998249	0.0119653	3	0	12	1.43541	0	1.2	0	Random Only
'DHCR242r'	0.993138	0.0570007	1	1	0.998249	0.0119653	3	0	12	1.43541	0	1.2	0	Random Only
'DHCR243r'	0.993135	0.057025	1	1	0.998249	0.0119653	3	0	12	1.43541	0	1.2	0	Random Only
'DHCR71r'	0.993135	0.057025	1	1	0.998249	0.0119653	3	0	12	1.43541	0	1.2	0	Random Only
'DHCR72r'	0.993135	0.057025	1	1	0.998249	0.0119653	3	0	12	1.43541	0	1.2	0	Random Only
'DHCRD1'	0.991108	0.0588828	1	1	0.998222	0.0119923	6	0	12	2.87081	0	1.2	0	Random Only
'DHCRD2'	0.992892	0.0589998	1	1	0.998249	0.0119653	3	0	12	1.43541	0	1.2	0	Random Only
'DHDPBMTm'	1	1	1	1	0.998249	0.0119653	0	0	12	0	0	1.2	0	Random Only
'DHEASt'	1	1	1	1	0.998249	0.0119653	0	0	12	0	0	1.2	0	Random Only
'DHEAStr'	1	1	1	1	0.998249	0.0119653	0	0	12	0	0	1.2	0	Random Only
'DHEAtr'	1	1	1	1	0.998249	0.0119653	0	0	12	0	0	1.2	0	Random Only
'DHFR'	0.988223	0.0629015	1	1	0.997804	0.0128661	6	0	15	2.87081	0	1.5	0	Random Only
'DHFtl'	0.992823	0.0596155	1	1	0.998249	0.0119653	3	0	12	1.43541	0	1.2	0	Random Only
'DHFtm'	0.992823	0.0596155	1	1	0.998249	0.0119653	3	0	12	1.43541	0	1.2	0	Random Only
'DHORD9'	0.832189	0.0560512	0.848169	0.00124961	0.915032	0.0857812	209	6000	549	100	100	54.9	1	Both
'DHORTS'	0.832189	0.0560512	0.848169	0.00124961	0.915032	0.0857812	209	6000	549	100	100	54.9	1	Both
'DHPM1'	1	1	1	1	0.998249	0.0119653	0	0	12	0	0	1.2	0	Random Only
'DHPR'	0.991961	0.0601562	1	1	0.959564	0.0474852	5	0	375	2.39234	0	37.5	0	Random Only
'DHPR2'	0.991961	0.0601562	1	1	0.959564	0.0474852	5	0	375	2.39234	0	37.5	0	Random Only
'DIDPtn'	1	1	1	1	0.998249	0.0119653	0	0	12	0	0	1.2	0	Random Only
'DIGALSGALSIDEte'	1	1	1	1	0.998249	0.0119653	0	0	12	0	0	1.2	0	Random Only
'DIGALSIDEtl'	1	1	1	1	0.998249	0.0119653	0	0	12	0	0	1.2	0	Random Only
'DINt'	0.988598	0.0628024	1	1	0.997572	0.0133515	6	0	15	2.87081	0	1.5	0	Random Only
'DITPtn'	1	1	1	1	0.998249	0.0119653	0	0	12	0	0	1.2	0	Random Only
'DLNLCGCPT1'	1	1	1	1	0.998249	0.0119653	0	0	12	0	0	1.2	0	Random Only
'DLNLCGCPT2'	1	1	1	1	0.998249	0.0119653	0	0	12	0	0	1.2	0	Random Only
'DLNLCGCRNt'	1	1	1	1	0.998249	0.0119653	0	0	12	0	0	1.2	0	Random Only
'DLNLCGt'	1	1	1	1	0.998249	0.0119653	0	0	12	0	0	1.2	0	Random Only
'DMATT'	1	1	1	1	0.998249	0.0119653	0	0	12	0	0	1.2	0	Random Only
'DMATTx'	0.993138	0.0570007	1	1	0.998249	0.0119653	3	0	12	1.43541	0	1.2	0	Random Only
'DMHPTCRNCPT1'	1	1	1	1	0.998249	0.0119653	0	0	12	0	0	1.2	0	Random Only
'DMHPTCRNCPT2'	1	1	1	1	0.998249	0.0119653	0	0	12	0	0	1.2	0	Random Only
'DMHPTCRNt'	1	1	1	1	0.998249	0.0119653	0	0	12	0	0	1.2	0	Random Only
'DMHPTCRNte'	1	1	1	1	0.998249	0.0119653	0	0	12	0	0	1.2	0	Random Only
'DMNONCRNCPT2'	1	1	1	1	0.998249	0.0119653	0	0	12	0	0	1.2	0	Random Only
'DMNONCRNt'	1	1	1	1	0.998249	0.0119653	0	0	12	0	0	1.2	0	Random Only
'DM_13-cis-oretn(n)'	1	1	1	1	0.998249	0.0119653	0	0	12	0	0	1.2	0	Random Only
'DM_13-cis-retn(n)'	1	1	1	1	0.998249	0.0119653	0	0	12	0	0	1.2	0	Random Only
'DM_Asn-X-Ser/Thr(ly)'	1	1	1	1	0.998249	0.0119653	0	0	12	0	0	1.2	0	Random Only
'DM_Ser-Gly/Ala-X-Gly(ly)'	1	1	1	1	0.998249	0.0119653	0	0	12	0	0	1.2	0	Random Only
'DM_Ser/Thr(ly)'	1	1	1	1	0.998249	0.0119653	0	0	12	0	0	1.2	0	Random Only
'DM_T_antigen(g)'	1	1	1	1	0.998249	0.0119653	0	0	12	0	0	1.2	0	Random Only
'DM_atp(c)'	0.992823	0.0596155	1	1	0.998249	0.0119653	3	0	12	1.43541	0	1.2	0	Random Only
'DM_avite1(c)'	1	1	1	1	0.998249	0.0119653	0	0	12	0	0	1.2	0	Random Only
'DM_avite2(c)'	1	1	1	1	0.998249	0.0119653	0	0	12	0	0	1.2	0	Random Only
'DM_bvite(c)'	1	1	1	1	0.998249	0.0119653	0	0	12	0	0	1.2	0	Random Only
'DM_datp(m)'	0.988598	0.0628024	1	1	0.997915	0.0126311	6	0	14	2.87081	0	1.4	0	Random Only
'DM_datp(n)'	0.988598	0.0628024	1	1	0.997757	0.0129674	6	0	15	2.87081	0	1.5	0	Random Only
'DM_dctp(m)'	0.988627	0.0628041	1	1	0.998128	0.0122421	6	0	13	2.87081	0	1.3	0	Random Only
'DM_dctp(n)'	0.988598	0.0628024	1	1	0.998012	0.0124505	6	0	13	2.87081	0	1.3	0	Random Only
'DM_dgtp(m)'	0.988598	0.0628024	1	1	0.997563	0.0133706	6	0	15	2.87081	0	1.5	0	Random Only
'DM_dgtp(n)'	0.988598	0.0628024	1	1	0.997347	0.0138629	6	0	19	2.87081	0	1.9	0	Random Only
'DM_dsT_antigen(g)'	1	1	1	1	0.998249	0.0119653	0	0	12	0	0	1.2	0	Random Only
'DM_dttp(m)'	0.991482	0.0562308	1	1	0.998225	0.0119871	6	0	12	2.87081	0	1.2	0	Random Only
'DM_dttp(n)'	0.990289	0.0621651	1	1	0.998215	0.0120102	6	0	12	2.87081	0	1.2	0	Random Only
'DM_ethamp(r)'	0.991118	0.0588726	1	1	0.998223	0.0119915	6	0	12	2.87081	0	1.2	0	Random Only
'DM_gpi_sig(er)'	1	1	1	1	0.998249	0.0119653	0	0	12	0	0	1.2	0	Random Only
'DM_kdn(c)'	0.993004	0.0581102	1	1	0.998249	0.0119653	3	0	12	1.43541	0	1.2	0	Random Only
'DM_m(em)3gacpail_prot_hs(r)'	1	1	1	1	0.998249	0.0119653	0	0	12	0	0	1.2	0	Random Only
'DM_mem2emgacpail_prot_hs(r)'	1	1	1	1	0.998249	0.0119653	0	0	12	0	0	1.2	0	Random Only
'DM_n5m2masn(g)'	1	1	1	1	0.998249	0.0119653	0	0	12	0	0	1.2	0	Random Only
'DM_oretn(n)'	1	1	1	1	0.998249	0.0119653	0	0	12	0	0	1.2	0	Random Only
'DM_sTn_antigen(g)'	1	1	1	1	0.998249	0.0119653	0	0	12	0	0	1.2	0	Random Only
'DM_sprm(c)'	1	1	1	1	0.998249	0.0119653	0	0	12	0	0	1.2	0	Random Only
'DM_yvite(c)'	1	1	1	1	0.998249	0.0119653	0	0	12	0	0	1.2	0	Random Only
'DNADDP'	0.992823	0.0596155	1	1	0.998249	0.0119653	3	0	12	1.43541	0	1.2	0	Random Only
'DNADtn'	0.992823	0.0596155	1	1	0.998249	0.0119653	3	0	12	1.43541	0	1.2	0	Random Only
'DNAMTSEn'	1	1	1	1	0.998249	0.0119653	0	0	12	0	0	1.2	0	Random Only
'DNAMTn'	1	1	1	1	0.998249	0.0119653	0	0	12	0	0	1.2	0	Random Only
'DNDPt10m'	1	1	1	1	0.998249	0.0119653	0	0	12	0	0	1.2	0	Random Only
'DNDPt11m'	1	1	1	1	0.998249	0.0119653	0	0	12	0	0	1.2	0	Random Only
'DNDPt12m'	0.991475	0.0562368	1	1	0.998223	0.0119909	6	0	12	2.87081	0	1.2	0	Random Only
'DNDPt13m'	0.991475	0.0562368	1	1	0.998223	0.0119909	6	0	12	2.87081	0	1.2	0	Random Only
'DNDPt14m'	1	1	1	1	0.998249	0.0119653	0	0	12	0	0	1.2	0	Random Only
'DNDPt15m'	1	1	1	1	0.998249	0.0119653	0	0	12	0	0	1.2	0	Random Only
'DNDPt16m'	1	1	1	1	0.998249	0.0119653	0	0	12	0	0	1.2	0	Random Only
'DNDPt17m'	1	1	1	1	0.998249	0.0119653	0	0	12	0	0	1.2	0	Random Only
'DNDPt18m'	0.991475	0.0562368	1	1	0.998223	0.0119909	6	0	12	2.87081	0	1.2	0	Random Only
'DNDPt19m'	0.991475	0.0562368	1	1	0.998223	0.0119909	6	0	12	2.87081	0	1.2	0	Random Only
'DNDPt1m'	0.991475	0.0562368	1	1	0.998223	0.0119909	6	0	12	2.87081	0	1.2	0	Random Only
'DNDPt20m'	0.991475	0.0562368	1	1	0.998223	0.0119909	6	0	12	2.87081	0	1.2	0	Random Only
'DNDPt21m'	0.991475	0.0562368	1	1	0.998223	0.0119909	6	0	12	2.87081	0	1.2	0	Random Only
'DNDPt22m'	1	1	1	1	0.998249	0.0119653	0	0	12	0	0	1.2	0	Random Only
'DNDPt23m'	1	1	1	1	0.998249	0.0119653	0	0	12	0	0	1.2	0	Random Only
'DNDPt24m'	1	1	1	1	0.998249	0.0119653	0	0	12	0	0	1.2	0	Random Only
'DNDPt25m'	1	1	1	1	0.998249	0.0119653	0	0	12	0	0	1.2	0	Random Only
'DNDPt26m'	1	1	1	1	0.998249	0.0119653	0	0	12	0	0	1.2	0	Random Only
'DNDPt27m'	1	1	1	1	0.998249	0.0119653	0	0	12	0	0	1.2	0	Random Only
'DNDPt28m'	1	1	1	1	0.998249	0.0119653	0	0	12	0	0	1.2	0	Random Only
'DNDPt29m'	1	1	1	1	0.998249	0.0119653	0	0	12	0	0	1.2	0	Random Only
'DNDPt2m'	0.991475	0.0562368	1	1	0.998223	0.0119909	6	0	12	2.87081	0	1.2	0	Random Only
'DNDPt30m'	0.991475	0.0562368	1	1	0.998223	0.0119909	6	0	12	2.87081	0	1.2	0	Random Only
'DNDPt31m'	0.991475	0.0562368	1	1	0.998223	0.0119909	6	0	12	2.87081	0	1.2	0	Random Only
'DNDPt32m'	0.991475	0.0562368	1	1	0.998223	0.0119909	6	0	12	2.87081	0	1.2	0	Random Only
'DNDPt33m'	1	1	1	1	0.998249	0.0119653	0	0	12	0	0	1.2	0	Random Only
'DNDPt34m'	1	1	1	1	0.998249	0.0119653	0	0	12	0	0	1.2	0	Random Only
'DNDPt35m'	1	1	1	1	0.998249	0.0119653	0	0	12	0	0	1.2	0	Random Only
'DNDPt36m'	1	1	1	1	0.998249	0.0119653	0	0	12	0	0	1.2	0	Random Only
'DNDPt37m'	1	1	1	1	0.998249	0.0119653	0	0	12	0	0	1.2	0	Random Only
'DNDPt38m'	1	1	1	1	0.998249	0.0119653	0	0	12	0	0	1.2	0	Random Only
'DNDPt39m'	1	1	1	1	0.998249	0.0119653	0	0	12	0	0	1.2	0	Random Only
'DNDPt3m'	1	1	1	1	0.998249	0.0119653	0	0	12	0	0	1.2	0	Random Only
'DNDPt40m'	1	1	1	1	0.998249	0.0119653	0	0	12	0	0	1.2	0	Random Only
'DNDPt41m'	1	1	1	1	0.998249	0.0119653	0	0	12	0	0	1.2	0	Random Only
'DNDPt42m'	0.991475	0.0562368	1	1	0.998223	0.0119909	6	0	12	2.87081	0	1.2	0	Random Only
'DNDPt43m'	0.991475	0.0562368	1	1	0.998223	0.0119909	6	0	12	2.87081	0	1.2	0	Random Only
'DNDPt44m'	0.991475	0.0562368	1	1	0.998223	0.0119909	6	0	12	2.87081	0	1.2	0	Random Only
'DNDPt45m'	0.991475	0.0562368	1	1	0.998223	0.0119909	6	0	12	2.87081	0	1.2	0	Random Only
'DNDPt46m'	1	1	1	1	0.998249	0.0119653	0	0	12	0	0	1.2	0	Random Only
'DNDPt47m'	1	1	1	1	0.998249	0.0119653	0	0	12	0	0	1.2	0	Random Only
'DNDPt48m'	1	1	1	1	0.998249	0.0119653	0	0	12	0	0	1.2	0	Random Only
'DNDPt49m'	1	1	1	1	0.998249	0.0119653	0	0	12	0	0	1.2	0	Random Only
'DNDPt4m'	1	1	1	1	0.998249	0.0119653	0	0	12	0	0	1.2	0	Random Only
'DNDPt50m'	1	1	1	1	0.998249	0.0119653	0	0	12	0	0	1.2	0	Random Only
'DNDPt51m'	1	1	1	1	0.998249	0.0119653	0	0	12	0	0	1.2	0	Random Only
'DNDPt52m'	1	1	1	1	0.998249	0.0119653	0	0	12	0	0	1.2	0	Random Only
'DNDPt53m'	1	1	1	1	0.998249	0.0119653	0	0	12	0	0	1.2	0	Random Only
'DNDPt54m'	1	1	1	1	0.998249	0.0119653	0	0	12	0	0	1.2	0	Random Only
'DNDPt55m'	0.991475	0.0562368	1	1	0.998223	0.0119909	6	0	12	2.87081	0	1.2	0	Random Only
'DNDPt56m'	0.991475	0.0562368	1	1	0.998223	0.0119909	6	0	12	2.87081	0	1.2	0	Random Only
'DNDPt57m'	0.991475	0.0562368	1	1	0.998223	0.0119909	6	0	12	2.87081	0	1.2	0	Random Only
'DNDPt58m'	0.991475	0.0562368	1	1	0.998223	0.0119909	6	0	12	2.87081	0	1.2	0	Random Only
'DNDPt59m'	1	1	1	1	0.998249	0.0119653	0	0	12	0	0	1.2	0	Random Only
'DNDPt5m'	1	1	1	1	0.998249	0.0119653	0	0	12	0	0	1.2	0	Random Only
'DNDPt60m'	1	1	1	1	0.998249	0.0119653	0	0	12	0	0	1.2	0	Random Only
'DNDPt61m'	1	1	1	1	0.998249	0.0119653	0	0	12	0	0	1.2	0	Random Only
'DNDPt62m'	1	1	1	1	0.998249	0.0119653	0	0	12	0	0	1.2	0	Random Only
'DNDPt63m'	1	1	1	1	0.998249	0.0119653	0	0	12	0	0	1.2	0	Random Only
'DNDPt6m'	1	1	1	1	0.998249	0.0119653	0	0	12	0	0	1.2	0	Random Only
'DNDPt7m'	1	1	1	1	0.998249	0.0119653	0	0	12	0	0	1.2	0	Random Only
'DNDPt8m'	1	1	1	1	0.998249	0.0119653	0	0	12	0	0	1.2	0	Random Only
'DNDPt9m'	1	1	1	1	0.998249	0.0119653	0	0	12	0	0	1.2	0	Random Only
'DOGULND1'	1	1	1	1	0.998249	0.0119653	0	0	12	0	0	1.2	0	Random Only
'DOGULND2'	1	1	1	1	0.998249	0.0119653	0	0	12	0	0	1.2	0	Random Only
'DOGULNO1'	1	1	1	1	0.998249	0.0119653	0	0	12	0	0	1.2	0	Random Only
'DOGULNO2'	1	1	1	1	0.998249	0.0119653	0	0	12	0	0	1.2	0	Random Only
'DOLASNT_Ler'	0.992823	0.0596155	1	1	0.998249	0.0119653	3	0	12	1.43541	0	1.2	0	Random Only
'DOLASNT_Uer'	0.992823	0.0596155	1	1	0.998249	0.0119653	3	0	12	1.43541	0	1.2	0	Random Only
'DOLDPP_Ler'	0.992823	0.0596155	1	1	0.998249	0.0119653	3	0	12	1.43541	0	1.2	0	Random Only
'DOLDPP_Uer'	0.992823	0.0596155	1	1	0.998249	0.0119653	3	0	12	1.43541	0	1.2	0	Random Only
'DOLGLCP_Lter'	0.992823	0.0596155	1	1	0.998249	0.0119653	3	0	12	1.43541	0	1.2	0	Random Only
'DOLGLCP_Uter'	0.992823	0.0596155	1	1	0.998249	0.0119653	3	0	12	1.43541	0	1.2	0	Random Only
'DOLGPP_Ler'	0.992823	0.0596155	1	1	0.998249	0.0119653	3	0	12	1.43541	0	1.2	0	Random Only
'DOLGPP_Uer'	0.992823	0.0596155	1	1	0.998249	0.0119653	3	0	12	1.43541	0	1.2	0	Random Only
'DOLICHOL_Lter'	0.992823	0.0596155	1	1	0.998249	0.0119653	3	0	12	1.43541	0	1.2	0	Random Only
'DOLICHOL_Uter'	0.992823	0.0596155	1	1	0.998249	0.0119653	3	0	12	1.43541	0	1.2	0	Random Only
'DOLK_L'	0.992823	0.0596155	1	1	0.998249	0.0119653	3	0	12	1.43541	0	1.2	0	Random Only
'DOLK_U'	0.992823	0.0596155	1	1	0.998249	0.0119653	3	0	12	1.43541	0	1.2	0	Random Only
'DOLMANP_Lter'	0.992823	0.0596155	1	1	0.998249	0.0119653	3	0	12	1.43541	0	1.2	0	Random Only
'DOLMANP_Uter'	0.992823	0.0596155	1	1	0.998249	0.0119653	3	0	12	1.43541	0	1.2	0	Random Only
'DOLPGT1_Ler'	0.992823	0.0596155	1	1	0.998249	0.0119653	3	0	12	1.43541	0	1.2	0	Random Only
'DOLPGT1_Uer'	0.992823	0.0596155	1	1	0.998249	0.0119653	3	0	12	1.43541	0	1.2	0	Random Only
'DOLPGT2_Ler'	0.992823	0.0596155	1	1	0.998249	0.0119653	3	0	12	1.43541	0	1.2	0	Random Only
'DOLPGT2_Uer'	0.992823	0.0596155	1	1	0.998249	0.0119653	3	0	12	1.43541	0	1.2	0	Random Only
'DOLPGT3_Ler'	0.992823	0.0596155	1	1	0.998249	0.0119653	3	0	12	1.43541	0	1.2	0	Random Only
'DOLPGT3_Uer'	0.992823	0.0596155	1	1	0.998249	0.0119653	3	0	12	1.43541	0	1.2	0	Random Only
'DOLPH_Ler'	0.992823	0.0596155	1	1	0.998249	0.0119653	3	0	12	1.43541	0	1.2	0	Random Only
'DOLPH_Uer'	0.992823	0.0596155	1	1	0.998249	0.0119653	3	0	12	1.43541	0	1.2	0	Random Only
'DOLPMT1_Ler'	0.992823	0.0596155	1	1	0.998249	0.0119653	3	0	12	1.43541	0	1.2	0	Random Only
'DOLPMT1_Uer'	0.992823	0.0596155	1	1	0.998249	0.0119653	3	0	12	1.43541	0	1.2	0	Random Only
'DOLPMT2_Ler'	0.992823	0.0596155	1	1	0.998249	0.0119653	3	0	12	1.43541	0	1.2	0	Random Only
'DOLPMT2_Uer'	0.992823	0.0596155	1	1	0.998249	0.0119653	3	0	12	1.43541	0	1.2	0	Random Only
'DOLPMT3_Ler'	0.992823	0.0596155	1	1	0.998249	0.0119653	3	0	12	1.43541	0	1.2	0	Random Only
'DOLPMT3_Uer'	0.992823	0.0596155	1	1	0.998249	0.0119653	3	0	12	1.43541	0	1.2	0	Random Only
'DOLPMT4_Ler'	0.992823	0.0596155	1	1	0.998249	0.0119653	3	0	12	1.43541	0	1.2	0	Random Only
'DOLPMT4_Uer'	0.992823	0.0596155	1	1	0.998249	0.0119653	3	0	12	1.43541	0	1.2	0	Random Only
'DOLPMT_L'	0.992823	0.0596155	1	1	0.998249	0.0119653	3	0	12	1.43541	0	1.2	0	Random Only
'DOLPMT_U'	0.992823	0.0596155	1	1	0.998249	0.0119653	3	0	12	1.43541	0	1.2	0	Random Only
'DOLP_Lter'	0.992823	0.0596155	1	1	0.998249	0.0119653	3	0	12	1.43541	0	1.2	0	Random Only
'DOLP_Uter'	0.992823	0.0596155	1	1	0.998249	0.0119653	3	0	12	1.43541	0	1.2	0	Random Only
'DOPABMO'	1	1	1	1	0.998249	0.0119653	0	0	12	0	0	1.2	0	Random Only
'DOPAMT'	1	1	1	1	0.998249	0.0119653	0	0	12	0	0	1.2	0	Random Only
'DOPASFt'	1	1	1	1	0.998249	0.0119653	0	0	12	0	0	1.2	0	Random Only
'DOPASULT'	1	1	1	1	0.998249	0.0119653	0	0	12	0	0	1.2	0	Random Only
'DOPAVESSEC'	0.992823	0.0596155	1	1	0.998249	0.0119653	3	0	12	1.43541	0	1.2	0	Random Only
'DOPAt4(2)r'	1	1	1	1	0.998249	0.0119653	0	0	12	0	0	1.2	0	Random Only
'DOPAtu'	1	1	1	1	0.998249	0.0119653	0	0	12	0	0	1.2	0	Random Only
'DPCOAK'	1	1	1	1	0.998249	0.0119653	0	0	12	0	0	1.2	0	Random Only
'DPCOAPP'	0.992823	0.0596155	1	1	0.998249	0.0119653	3	0	12	1.43541	0	1.2	0	Random Only
'DPCOAtl'	1	1	1	1	0.998249	0.0119653	0	0	12	0	0	1.2	0	Random Only
'DPHMBDCm'	1	1	1	1	0.998249	0.0119653	0	0	12	0	0	1.2	0	Random Only
'DPMVDx'	0.993138	0.0570007	1	1	0.998249	0.0119653	3	0	12	1.43541	0	1.2	0	Random Only
'DRIBt'	0.99299	0.0582317	1	1	0.998249	0.0119653	3	0	12	1.43541	0	1.2	0	Random Only
'DRPA'	1	1	1	1	0.998249	0.0119653	0	0	12	0	0	1.2	0	Random Only
'DSAT'	0.991108	0.0588828	1	1	0.998222	0.0119923	6	0	12	2.87081	0	1.2	0	Random Only
'DTDPtn'	1	1	1	1	0.998249	0.0119653	0	0	12	0	0	1.2	0	Random Only
'DTMPK'	0.990289	0.0621651	1	1	0.998215	0.0120102	6	0	12	2.87081	0	1.2	0	Random Only
'DTTPtn'	1	1	1	1	0.998249	0.0119653	0	0	12	0	0	1.2	0	Random Only
'DUDPtn'	1	1	1	1	0.998249	0.0119653	0	0	12	0	0	1.2	0	Random Only
'DUMPtn'	1	1	1	1	0.998249	0.0119653	0	0	12	0	0	1.2	0	Random Only
'DURAD'	1	1	1	1	0.998249	0.0119653	0	0	12	0	0	1.2	0	Random Only
'DURAD2'	1	1	1	1	0.998249	0.0119653	0	0	12	0	0	1.2	0	Random Only
'DURIK1'	0.992823	0.0596155	1	1	0.998249	0.0119653	3	0	12	1.43541	0	1.2	0	Random Only
'DURIK1m'	0.992823	0.0596155	1	1	0.998249	0.0119653	3	0	12	1.43541	0	1.2	0	Random Only
'DURIPP'	0.987958	0.0629784	1	1	0.997801	0.0128738	6	0	15	2.87081	0	1.5	0	Random Only
'DURIt'	0.98877	0.0628	1	1	0.998183	0.0121144	6	0	13	2.87081	0	1.3	0	Random Only
'DURItn'	1	1	1	1	0.998249	0.0119653	0	0	12	0	0	1.2	0	Random Only
'DUTPDPm'	0.992823	0.0596155	1	1	0.998249	0.0119653	3	0	12	1.43541	0	1.2	0	Random Only
'DUTPDPn'	1	1	1	1	0.998249	0.0119653	0	0	12	0	0	1.2	0	Random Only
'EAFLATOXINte'	1	1	1	1	0.998249	0.0119653	0	0	12	0	0	1.2	0	Random Only
'EBASTINEOHte'	1	1	1	1	0.998249	0.0119653	0	0	12	0	0	1.2	0	Random Only
'EBASTINEte'	1	1	1	1	0.998249	0.0119653	0	0	12	0	0	1.2	0	Random Only
'EBP1r'	0.993138	0.0570007	1	1	0.998249	0.0119653	3	0	12	1.43541	0	1.2	0	Random Only
'EBP2r'	0.993138	0.0570007	1	1	0.998249	0.0119653	3	0	12	1.43541	0	1.2	0	Random Only
'ECOAH12m'	0.95002	0.0700031	1	1	0.99084	0.0167433	41	0	12	19.6172	0	1.2	0	Random Only
'ECOAH1m'	1	1	1	1	0.998249	0.0119653	0	0	12	0	0	1.2	0	Random Only
'ECOAH1x'	1	1	1	1	0.998249	0.0119653	0	0	12	0	0	1.2	0	Random Only
'ECOAH9m'	1	1	1	1	0.998249	0.0119653	0	0	12	0	0	1.2	0	Random Only
'EGMESTr'	1	1	1	1	0.998249	0.0119653	0	0	12	0	0	1.2	0	Random Only
'EHGLAT'	1	1	1	1	0.998249	0.0119653	0	0	12	0	0	1.2	0	Random Only
'EHGLAT2m'	1	1	1	1	0.998249	0.0119653	0	0	12	0	0	1.2	0	Random Only
'EHGLATm'	1	1	1	1	0.998249	0.0119653	0	0	12	0	0	1.2	0	Random Only
'EICOSTETCPT1'	1	1	1	1	0.998249	0.0119653	0	0	12	0	0	1.2	0	Random Only
'EICOSTETCPT2'	1	1	1	1	0.998249	0.0119653	0	0	12	0	0	1.2	0	Random Only
'EICOSTETCRNt'	1	1	1	1	0.998249	0.0119653	0	0	12	0	0	1.2	0	Random Only
'EICOSTETt'	1	1	1	1	0.998249	0.0119653	0	0	12	0	0	1.2	0	Random Only
'ELAIDCPT1'	1	1	1	1	0.998249	0.0119653	0	0	12	0	0	1.2	0	Random Only
'ELAIDCPT2'	1	1	1	1	0.998249	0.0119653	0	0	12	0	0	1.2	0	Random Only
'ELAIDCRNt'	1	1	1	1	0.998249	0.0119653	0	0	12	0	0	1.2	0	Random Only
'ELAIDt'	0.995252	0.0394555	1	1	0.998249	0.0119653	3	0	12	1.43541	0	1.2	0	Random Only
'ENGASE'	1	1	1	1	0.998249	0.0119653	0	0	12	0	0	1.2	0	Random Only
'ENGASE2'	1	1	1	1	0.998249	0.0119653	0	0	12	0	0	1.2	0	Random Only
'ENGASE2ly'	0.992823	0.0596155	1	1	0.998249	0.0119653	3	0	12	1.43541	0	1.2	0	Random Only
'ENMAN1g'	1	1	1	1	0.998249	0.0119653	0	0	12	0	0	1.2	0	Random Only
'ENMAN2g'	1	1	1	1	0.998249	0.0119653	0	0	12	0	0	1.2	0	Random Only
'ENMAN3g'	1	1	1	1	0.998249	0.0119653	0	0	12	0	0	1.2	0	Random Only
'ENMAN4g'	1	1	1	1	0.998249	0.0119653	0	0	12	0	0	1.2	0	Random Only
'ENMAN5g'	1	1	1	1	0.998249	0.0119653	0	0	12	0	0	1.2	0	Random Only
'ENMAN6g'	1	1	1	1	0.998249	0.0119653	0	0	12	0	0	1.2	0	Random Only
'ENO'	0.991518	0.0609078	1	1	0.998249	0.0119653	5	0	12	2.39234	0	1.2	0	Random Only
'ESTRADIOLGLCt'	0.992823	0.0596155	1	1	0.998249	0.0119653	3	0	12	1.43541	0	1.2	0	Random Only
'ESTRADIOLGLCt2'	0.992823	0.0596155	1	1	0.998249	0.0119653	3	0	12	1.43541	0	1.2	0	Random Only
'ESTRADIOLGLCtr'	1	1	1	1	0.998249	0.0119653	0	0	12	0	0	1.2	0	Random Only
'ESTRADIOLt'	1	1	1	1	0.998249	0.0119653	0	0	12	0	0	1.2	0	Random Only
'ESTRADIOLtr'	1	1	1	1	0.998249	0.0119653	0	0	12	0	0	1.2	0	Random Only
'ESTRIOLGLCte'	1	1	1	1	0.998249	0.0119653	0	0	12	0	0	1.2	0	Random Only
'ESTRIOLGLCtr'	1	1	1	1	0.998249	0.0119653	0	0	12	0	0	1.2	0	Random Only
'ESTRONEGLCt'	1	1	1	1	0.998249	0.0119653	0	0	12	0	0	1.2	0	Random Only
'ESTRONEGLCtr'	1	1	1	1	0.998249	0.0119653	0	0	12	0	0	1.2	0	Random Only
'ESTRONESt'	1	1	1	1	0.998249	0.0119653	0	0	12	0	0	1.2	0	Random Only
'ESTRONESt2'	1	1	1	1	0.998249	0.0119653	0	0	12	0	0	1.2	0	Random Only
'ESTRONEtr'	1	1	1	1	0.998249	0.0119653	0	0	12	0	0	1.2	0	Random Only
'ESTSULT'	0.992823	0.0596155	1	1	0.998249	0.0119653	3	0	12	1.43541	0	1.2	0	Random Only
'ETF'	0.991807	0.0603876	1	1	0.99803	0.0129085	5	0	14	2.39234	0	1.4	0	Random Only
'ETFQO'	0.991807	0.0603876	1	1	0.99803	0.0129085	5	0	14	2.39234	0	1.4	0	Random Only
'ETHAK'	0.992823	0.0596155	1	1	0.998249	0.0119653	3	0	12	1.43541	0	1.2	0	Random Only
'ETHP'	0.992823	0.0596155	1	1	0.998249	0.0119653	3	0	12	1.43541	0	1.2	0	Random Only
'ETOHMO'	1	1	1	1	0.998249	0.0119653	0	0	12	0	0	1.2	0	Random Only
'ETOHt'	1	1	1	1	0.998249	0.0119653	0	0	12	0	0	1.2	0	Random Only
'ETOHtx'	1	1	1	1	0.998249	0.0119653	0	0	12	0	0	1.2	0	Random Only
'EX_10fthf(e)'	1	1	1	1	0.998249	0.0119653	0	0	12	0	0	1.2	0	Random Only
'EX_10fthf5glu(e)'	1	1	1	1	0.998249	0.0119653	0	0	12	0	0	1.2	0	Random Only
'EX_10fthf6glu(e)'	1	1	1	1	0.998249	0.0119653	0	0	12	0	0	1.2	0	Random Only
'EX_10fthf7glu(e)'	1	1	1	1	0.998249	0.0119653	0	0	12	0	0	1.2	0	Random Only
'EX_11-cis-retfa(e)'	1	1	1	1	0.998249	0.0119653	0	0	12	0	0	1.2	0	Random Only
'EX_13-cis-retnglc(e)'	1	1	1	1	0.998249	0.0119653	0	0	12	0	0	1.2	0	Random Only
'EX_1glyc_hs(e)'	0.993656	0.053197	1	1	0.998249	0.0119653	3	0	12	1.43541	0	1.2	0	Random Only
'EX_1mncam(e)'	1	1	1	1	0.998249	0.0119653	0	0	12	0	0	1.2	0	Random Only
'EX_2425dhvitd2(e)'	1	1	1	1	0.998249	0.0119653	0	0	12	0	0	1.2	0	Random Only
'EX_2425dhvitd3(e)'	0.993164	0.0567838	1	1	0.998249	0.0119653	3	0	12	1.43541	0	1.2	0	Random Only
'EX_24nph(e)'	1	1	1	1	0.998249	0.0119653	0	0	12	0	0	1.2	0	Random Only
'EX_25hvitd2(e)'	1	1	1	1	0.998249	0.0119653	0	0	12	0	0	1.2	0	Random Only
'EX_25hvitd3(e)'	0.993151	0.0568925	1	1	0.998249	0.0119653	3	0	12	1.43541	0	1.2	0	Random Only
'EX_2hb(e)'	0.961175	0.067255	1	1	0.98173	0.0254134	34	0	131	16.2679	0	13.1	1	Random Only
'EX_2mcit(e)'	0.961175	0.067255	1	1	0.98173	0.0254134	34	0	131	16.2679	0	13.1	1	Random Only
'EX_35cgmp(e)'	0.988598	0.0628024	1	1	0.997566	0.0133636	6	0	15	2.87081	0	1.5	0	Random Only
'EX_3aib(e)'	0.955927	0.0670616	1	1	0.99084	0.0167433	32	0	12	15.311	0	1.2	0	Random Only
'EX_3mlda(e)'	0.980052	0.068395	1	1	0.937575	0.0481148	29	0	555	13.8756	0	55.5	0	Random Only
'EX_4abut(e)'	0.989141	0.0627899	1	1	0.998194	0.0120848	6	0	13	2.87081	0	1.3	0	Random Only
'EX_4hdebrisoquine(e)'	1	1	1	1	0.998249	0.0119653	0	0	12	0	0	1.2	0	Random Only
'EX_4hphac(e)'	0.99058	0.0622375	1	1	0.998249	0.0119653	6	0	12	2.87081	0	1.2	0	Random Only
'EX_4mptnl(e)'	1	1	1	1	0.998249	0.0119653	0	0	12	0	0	1.2	0	Random Only
'EX_4nph(e)'	1	1	1	1	0.998249	0.0119653	0	0	12	0	0	1.2	0	Random Only
'EX_4nphsf(e)'	1	1	1	1	0.998249	0.0119653	0	0	12	0	0	1.2	0	Random Only
'EX_4pyrdx(e)'	1	1	1	1	0.998249	0.0119653	0	0	12	0	0	1.2	0	Random Only
'EX_5adtststerone(e)'	1	1	1	1	0.998249	0.0119653	0	0	12	0	0	1.2	0	Random Only
'EX_5adtststeroneglc(e)'	1	1	1	1	0.998249	0.0119653	0	0	12	0	0	1.2	0	Random Only
'EX_5dhf(e)'	1	1	1	1	0.998249	0.0119653	0	0	12	0	0	1.2	0	Random Only
'EX_5fthf(e)'	1	1	1	1	0.998249	0.0119653	0	0	12	0	0	1.2	0	Random Only
'EX_5htrp(e)'	0.9909	0.0618087	1	1	0.793342	0.0994563	6	0	883	2.87081	0	88.3	1	Random Only
'EX_5mthf(e)'	1	1	1	1	0.998249	0.0119653	0	0	12	0	0	1.2	0	Random Only
'EX_5thf(e)'	1	1	1	1	0.998249	0.0119653	0	0	12	0	0	1.2	0	Random Only
'EX_6dhf(e)'	1	1	1	1	0.998249	0.0119653	0	0	12	0	0	1.2	0	Random Only
'EX_6htststerone(e)'	1	1	1	1	0.998249	0.0119653	0	0	12	0	0	1.2	0	Random Only
'EX_6thf(e)'	1	1	1	1	0.998249	0.0119653	0	0	12	0	0	1.2	0	Random Only
'EX_7dhf(e)'	1	1	1	1	0.998249	0.0119653	0	0	12	0	0	1.2	0	Random Only
'EX_7thf(e)'	1	1	1	1	0.998249	0.0119653	0	0	12	0	0	1.2	0	Random Only
'EX_9-cis-retfa(e)'	1	1	1	1	0.998249	0.0119653	0	0	12	0	0	1.2	0	Random Only
'EX_CLPND(e)'	1	1	1	1	0.998249	0.0119653	0	0	12	0	0	1.2	0	Random Only
'EX_Lcystin(e)'	1	1	1	1	0.998249	0.0119653	0	0	12	0	0	1.2	0	Random Only
'EX_Rtotal(e)'	0.994326	0.0492794	1	1	0.998249	0.0119653	3	0	12	1.43541	0	1.2	0	Random Only
'EX_Rtotal2(e)'	0.994326	0.0492794	1	1	0.998249	0.0119653	3	0	12	1.43541	0	1.2	0	Random Only
'EX_Rtotal3(e)'	0.994326	0.0492794	1	1	0.998249	0.0119653	3	0	12	1.43541	0	1.2	0	Random Only
'EX_Tyr-ggn(e)'	1	1	1	1	0.998249	0.0119653	0	0	12	0	0	1.2	0	Random Only
'EX_abt(e)'	0.9934	0.0548234	1	1	0.998249	0.0119653	3	0	12	1.43541	0	1.2	0	Random Only
'EX_ac(e)'	0.993174	0.0567437	1	1	0.998249	0.0119653	3	0	12	1.43541	0	1.2	0	Random Only
'EX_acac(e)'	0.992823	0.0596155	1	1	0.998249	0.0119653	3	0	12	1.43541	0	1.2	0	Random Only
'EX_acald(e)'	1	1	1	1	0.998249	0.0119653	0	0	12	0	0	1.2	0	Random Only
'EX_acetone(e)'	0.992823	0.0596155	1	1	0.998249	0.0119653	3	0	12	1.43541	0	1.2	0	Random Only
'EX_acgalfucgalacgalfuc12gal14acglcgalgluside_hs(e)'	1	1	1	1	0.998249	0.0119653	0	0	12	0	0	1.2	0	Random Only
'EX_acgalfucgalacgalfucgalacglcgal14acglcgalgluside_hs(e)'	1	1	1	1	0.998249	0.0119653	0	0	12	0	0	1.2	0	Random Only
'EX_acgam(e)'	1	1	1	1	0.998249	0.0119653	0	0	12	0	0	1.2	0	Random Only
'EX_ach(e)'	1	1	1	1	0.998249	0.0119653	0	0	12	0	0	1.2	0	Random Only
'EX_acn13acngalgbside_hs(e)'	1	1	1	1	0.998249	0.0119653	0	0	12	0	0	1.2	0	Random Only
'EX_acn23acngalgbside_hs(e)'	1	1	1	1	0.998249	0.0119653	0	0	12	0	0	1.2	0	Random Only
'EX_acnacngal14acglcgalgluside_hs(e)'	1	1	1	1	0.998249	0.0119653	0	0	12	0	0	1.2	0	Random Only
'EX_acnacngalgbside_hs(e)'	1	1	1	1	0.998249	0.0119653	0	0	12	0	0	1.2	0	Random Only
'EX_acngalacglcgal14acglcgalgluside_hs(e)'	1	1	1	1	0.998249	0.0119653	0	0	12	0	0	1.2	0	Random Only
'EX_ade(e)'	0.988598	0.0628024	1	1	0.997324	0.0139157	6	0	20	2.87081	0	2	0	Random Only
'EX_adn(e)'	0.988598	0.0628024	1	1	0.997324	0.0139157	6	0	20	2.87081	0	2	0	Random Only
'EX_adp'	1	1	1	1	0.998249	0.0119653	0	0	12	0	0	1.2	0	Random Only
'EX_adprbp(e)'	1	1	1	1	0.998249	0.0119653	0	0	12	0	0	1.2	0	Random Only
'EX_adprib(e)'	1	1	1	1	0.998249	0.0119653	0	0	12	0	0	1.2	0	Random Only
'EX_adrn(e)'	1	1	1	1	0.998249	0.0119653	0	0	12	0	0	1.2	0	Random Only
'EX_adrnl(e)'	1	1	1	1	0.998249	0.0119653	0	0	12	0	0	1.2	0	Random Only
'EX_aflatoxin(e)'	1	1	1	1	0.998249	0.0119653	0	0	12	0	0	1.2	0	Random Only
'EX_ahandrostanglc(e)'	1	1	1	1	0.998249	0.0119653	0	0	12	0	0	1.2	0	Random Only
'EX_ak2lgchol_hs(e)'	1	1	1	1	0.998249	0.0119653	0	0	12	0	0	1.2	0	Random Only
'EX_akg(e)'	0.992662	0.0596415	1	1	0.998249	0.0119653	3	0	12	1.43541	0	1.2	0	Random Only
'EX_ala-B(e)'	1	1	1	1	0.998249	0.0119653	0	0	12	0	0	1.2	0	Random Only
'EX_ala-D(e)'	0.990505	0.0345054	1	1	0.997324	0.0139157	14	0	20	6.69856	0	2	0	Random Only
'EX_ala-L(e)'	0.990505	0.0345054	1	1	0.997324	0.0139157	14	0	20	6.69856	0	2	0	Random Only
'EX_aldstrn(e)'	1	1	1	1	0.998249	0.0119653	0	0	12	0	0	1.2	0	Random Only
'EX_amp(e)'	1	1	1	1	0.998249	0.0119653	0	0	12	0	0	1.2	0	Random Only
'EX_andrstrn(e)'	1	1	1	1	0.998249	0.0119653	0	0	12	0	0	1.2	0	Random Only
'EX_andrstrnglc(e)'	1	1	1	1	0.998249	0.0119653	0	0	12	0	0	1.2	0	Random Only
'EX_aqcobal(e)'	1	1	1	1	0.998249	0.0119653	0	0	12	0	0	1.2	0	Random Only
'EX_arab-L(e)'	1	1	1	1	0.998249	0.0119653	0	0	12	0	0	1.2	0	Random Only
'EX_arach(e)'	1	1	1	1	0.998249	0.0119653	0	0	12	0	0	1.2	0	Random Only
'EX_arachd(e)'	1	1	1	1	0.998249	0.0119653	0	0	12	0	0	1.2	0	Random Only
'EX_arg-L(e)'	1	1	1	1	0.998218	0.012003	0	0	12	0	0	1.2	0	Random Only
'EX_ascb-L(e)'	1	1	1	1	0.998249	0.0119653	0	0	12	0	0	1.2	0	Random Only
'EX_asn-L(e)'	0.988598	0.0628024	1	1	0.997324	0.0139157	6	0	20	2.87081	0	2	0	Random Only
'EX_asp-D(e)'	1	1	1	1	0.998249	0.0119653	0	0	12	0	0	1.2	0	Random Only
'EX_asp-L(e)'	1	1	1	1	0.998249	0.0119653	0	0	12	0	0	1.2	0	Random Only
'EX_atp(e)'	1	1	1	1	0.998249	0.0119653	0	0	12	0	0	1.2	0	Random Only
'EX_avite1(e)'	1	1	1	1	0.998249	0.0119653	0	0	12	0	0	1.2	0	Random Only
'EX_avite2(e)'	1	1	1	1	0.998249	0.0119653	0	0	12	0	0	1.2	0	Random Only
'EX_bhb(e)'	0.993215	0.0565495	1	1	0.998249	0.0119653	3	0	12	1.43541	0	1.2	0	Random Only
'EX_bildglcur(e)'	1	1	1	1	0.998249	0.0119653	0	0	12	0	0	1.2	0	Random Only
'EX_bilglcur(e)'	1	1	1	1	0.998249	0.0119653	0	0	12	0	0	1.2	0	Random Only
'EX_bilirub(e)'	1	1	1	1	0.998249	0.0119653	0	0	12	0	0	1.2	0	Random Only
'EX_biocyt(e)'	1	1	1	1	0.998249	0.0119653	0	0	12	0	0	1.2	0	Random Only
'EX_btn(e)'	1	1	1	1	0.998249	0.0119653	0	0	12	0	0	1.2	0	Random Only
'EX_but(e)'	1	1	1	1	0.998249	0.0119653	0	0	12	0	0	1.2	0	Random Only
'EX_bvite(e)'	1	1	1	1	0.998249	0.0119653	0	0	12	0	0	1.2	0	Random Only
'EX_bz(e)'	1	1	1	1	0.998249	0.0119653	0	0	12	0	0	1.2	0	Random Only
'EX_ca2(e)'	1	1	1	1	0.998249	0.0119653	0	0	12	0	0	1.2	0	Random Only
'EX_camp(e)'	0.988598	0.0628024	1	1	0.997354	0.0138473	6	0	19	2.87081	0	1.9	0	Random Only
'EX_cca_d3(e)'	1	1	1	1	0.998249	0.0119653	0	0	12	0	0	1.2	0	Random Only
'EX_cgly(e)'	0.926514	0.0664032	0.933214	0.00258756	0.867811	0.0316938	168	5999	990	80.3828	99.9833	99	0	Both
'EX_chol(e)'	0.99293	0.058726	1	1	0.998249	0.0119653	3	0	12	1.43541	0	1.2	0	Random Only
'EX_cholate(e)'	1	1	1	1	0.998249	0.0119653	0	0	12	0	0	1.2	0	Random Only
'EX_chsterol(e)'	0.993135	0.057025	1	1	0.998249	0.0119653	3	0	12	1.43541	0	1.2	0	Random Only
'EX_chtn(e)'	1	1	1	1	0.998249	0.0119653	0	0	12	0	0	1.2	0	Random Only
'EX_cit(e)'	0.990691	0.0620922	1	1	0.998249	0.0119653	6	0	12	2.87081	0	1.2	0	Random Only
'EX_cl(e)'	1	1	1	1	0.998249	0.0119653	0	0	12	0	0	1.2	0	Random Only
'EX_cmp(e)'	1	1	1	1	0.998249	0.0119653	0	0	12	0	0	1.2	0	Random Only
'EX_co(e)'	1	1	1	1	0.998249	0.0119653	0	0	12	0	0	1.2	0	Random Only
'EX_co2(e)'	0.993037	0.0578014	1	1	0.998249	0.0119653	3	0	12	1.43541	0	1.2	0	Random Only
'EX_coumarin(e)'	1	1	1	1	0.998249	0.0119653	0	0	12	0	0	1.2	0	Random Only
'EX_creat(e)'	0.989743	0.0624154	1	1	0.997709	0.0129864	6	0	15	2.87081	0	1.5	0	Random Only
'EX_crmp_hs(e)'	0.994719	0.0451221	1	1	0.998223	0.0119909	3	0	12	1.43541	0	1.2	0	Random Only
'EX_crn(e)'	1	1	1	1	0.998249	0.0119653	0	0	12	0	0	1.2	0	Random Only
'EX_crtsl(e)'	1	1	1	1	0.998249	0.0119653	0	0	12	0	0	1.2	0	Random Only
'EX_crtstrn(e)'	1	1	1	1	0.998249	0.0119653	0	0	12	0	0	1.2	0	Random Only
'EX_crvnc(e)'	1	1	1	1	0.998249	0.0119653	0	0	12	0	0	1.2	0	Random Only
'EX_csn(e)'	1	1	1	1	0.998249	0.0119653	0	0	12	0	0	1.2	0	Random Only
'EX_cspg_a(e)'	1	1	1	1	0.998249	0.0119653	0	0	12	0	0	1.2	0	Random Only
'EX_cspg_b(e)'	1	1	1	1	0.998249	0.0119653	0	0	12	0	0	1.2	0	Random Only
'EX_cspg_c(e)'	1	1	1	1	0.998249	0.0119653	0	0	12	0	0	1.2	0	Random Only
'EX_cspg_d(e)'	1	1	1	1	0.998249	0.0119653	0	0	12	0	0	1.2	0	Random Only
'EX_cspg_e(e)'	1	1	1	1	0.998249	0.0119653	0	0	12	0	0	1.2	0	Random Only
'EX_cyan(e)'	1	1	1	1	0.998249	0.0119653	0	0	12	0	0	1.2	0	Random Only
'EX_cys-L(e)'	0.926514	0.0664032	0.933214	0.00258756	0.867811	0.0316938	168	5999	990	80.3828	99.9833	99	0	Both
'EX_cytd(e)'	0.988598	0.0628024	1	1	0.997409	0.0137206	6	0	17	2.87081	0	1.7	0	Random Only
'EX_dad-2(e)'	0.988598	0.0628024	1	1	0.997324	0.0139157	6	0	20	2.87081	0	2	0	Random Only
'EX_dag_hs(e)'	0.995112	0.042818	1	1	0.998249	0.0119653	3	0	12	1.43541	0	1.2	0	Random Only
'EX_dcsptn1(e)'	1	1	1	1	0.998249	0.0119653	0	0	12	0	0	1.2	0	Random Only
'EX_dcyt(e)'	0.988598	0.0628024	1	1	0.99737	0.0138095	6	0	19	2.87081	0	1.9	0	Random Only
'EX_debrisoquine(e)'	1	1	1	1	0.998249	0.0119653	0	0	12	0	0	1.2	0	Random Only
'EX_dgchol(e)'	1	1	1	1	0.998249	0.0119653	0	0	12	0	0	1.2	0	Random Only
'EX_dgsn(e)'	0.988598	0.0628024	1	1	0.997324	0.0139157	6	0	20	2.87081	0	2	0	Random Only
'EX_dhdascb(e)'	1	1	1	1	0.998249	0.0119653	0	0	12	0	0	1.2	0	Random Only
'EX_dheas(e)'	1	1	1	1	0.998249	0.0119653	0	0	12	0	0	1.2	0	Random Only
'EX_dhf(e)'	1	1	1	1	0.998249	0.0119653	0	0	12	0	0	1.2	0	Random Only
'EX_digalsgalside_hs(e)'	1	1	1	1	0.998249	0.0119653	0	0	12	0	0	1.2	0	Random Only
'EX_din(e)'	0.988598	0.0628024	1	1	0.997572	0.0133515	6	0	15	2.87081	0	1.5	0	Random Only
'EX_dlnlcg(e)'	1	1	1	1	0.998249	0.0119653	0	0	12	0	0	1.2	0	Random Only
'EX_dmhptcrn(e)'	1	1	1	1	0.998249	0.0119653	0	0	12	0	0	1.2	0	Random Only
'EX_dopa(e)'	1	1	1	1	0.998249	0.0119653	0	0	12	0	0	1.2	0	Random Only
'EX_dopasf(e)'	1	1	1	1	0.998249	0.0119653	0	0	12	0	0	1.2	0	Random Only
'EX_drib(e)'	0.99299	0.0582317	1	1	0.998249	0.0119653	3	0	12	1.43541	0	1.2	0	Random Only
'EX_duri(e)'	0.98877	0.0628	1	1	0.998183	0.0121144	6	0	13	2.87081	0	1.3	0	Random Only
'EX_eaflatoxin(e)'	1	1	1	1	0.998249	0.0119653	0	0	12	0	0	1.2	0	Random Only
'EX_ebastine(e)'	1	1	1	1	0.998249	0.0119653	0	0	12	0	0	1.2	0	Random Only
'EX_ebastineoh(e)'	1	1	1	1	0.998249	0.0119653	0	0	12	0	0	1.2	0	Random Only
'EX_eicostet(e)'	1	1	1	1	0.998249	0.0119653	0	0	12	0	0	1.2	0	Random Only
'EX_elaid(e)'	0.995252	0.0394555	1	1	0.998249	0.0119653	3	0	12	1.43541	0	1.2	0	Random Only
'EX_estradiol(e)'	1	1	1	1	0.998249	0.0119653	0	0	12	0	0	1.2	0	Random Only
'EX_estradiolglc(e)'	1	1	1	1	0.998249	0.0119653	0	0	12	0	0	1.2	0	Random Only
'EX_estriolglc(e)'	1	1	1	1	0.998249	0.0119653	0	0	12	0	0	1.2	0	Random Only
'EX_estroneglc(e)'	1	1	1	1	0.998249	0.0119653	0	0	12	0	0	1.2	0	Random Only
'EX_estrones(e)'	1	1	1	1	0.998249	0.0119653	0	0	12	0	0	1.2	0	Random Only
'EX_etoh(e)'	1	1	1	1	0.998249	0.0119653	0	0	12	0	0	1.2	0	Random Only
'EX_fe2(e)'	1	1	1	1	0.998249	0.0119653	0	0	12	0	0	1.2	0	Random Only
'EX_fol(e)'	1	1	1	1	0.998249	0.0119653	0	0	12	0	0	1.2	0	Random Only
'EX_for(e)'	0.993068	0.0575782	1	1	0.998249	0.0119653	3	0	12	1.43541	0	1.2	0	Random Only
'EX_fru(e)'	0.992926	0.0587607	1	1	0.998249	0.0119653	3	0	12	1.43541	0	1.2	0	Random Only
'EX_fuc-L(e)'	1	1	1	1	0.998249	0.0119653	0	0	12	0	0	1.2	0	Random Only
'EX_fuc13galacglcgal14acglcgalgluside_hs(e)'	1	1	1	1	0.998249	0.0119653	0	0	12	0	0	1.2	0	Random Only
'EX_fuc14galacglcgalgluside_hs(e)'	1	1	1	1	0.998249	0.0119653	0	0	12	0	0	1.2	0	Random Only
'EX_fucacgalfucgalacglcgalgluside_hs(e)'	1	1	1	1	0.998249	0.0119653	0	0	12	0	0	1.2	0	Random Only
'EX_fucacngal14acglcgalgluside_hs(e)'	1	1	1	1	0.998249	0.0119653	0	0	12	0	0	1.2	0	Random Only
'EX_fucacngalacglcgalgluside_hs(e)'	1	1	1	1	0.998249	0.0119653	0	0	12	0	0	1.2	0	Random Only
'EX_fucfuc12gal14acglcgalgluside_hs(e)'	1	1	1	1	0.998249	0.0119653	0	0	12	0	0	1.2	0	Random Only
'EX_fucfuc132galacglcgal14acglcgalgluside_hs(e)'	1	1	1	1	0.998249	0.0119653	0	0	12	0	0	1.2	0	Random Only
'EX_fucfucfucgalacglc13galacglcgal14acglcgalgluside_hs(e)'	1	1	1	1	0.998249	0.0119653	0	0	12	0	0	1.2	0	Random Only
'EX_fucfucfucgalacglcgal14acglcgalgluside_hs(e)'	1	1	1	1	0.998249	0.0119653	0	0	12	0	0	1.2	0	Random Only
'EX_fucfucgalacglcgalgluside_hs(e)'	1	1	1	1	0.998249	0.0119653	0	0	12	0	0	1.2	0	Random Only
'EX_fucgal14acglcgalgluside_hs(e)'	1	1	1	1	0.998249	0.0119653	0	0	12	0	0	1.2	0	Random Only
'EX_fucgalfucgalacglcgalgluside_hs(e)'	1	1	1	1	0.998249	0.0119653	0	0	12	0	0	1.2	0	Random Only
'EX_fucgalgbside_hs(e)'	1	1	1	1	0.998249	0.0119653	0	0	12	0	0	1.2	0	Random Only
'EX_gal(e)'	0.993526	0.0537732	1	1	0.998249	0.0119653	3	0	12	1.43541	0	1.2	0	Random Only
'EX_galacglcgalgbside_hs(e)'	1	1	1	1	0.998249	0.0119653	0	0	12	0	0	1.2	0	Random Only
'EX_galfuc12gal14acglcgalgluside_hs(e)'	1	1	1	1	0.998249	0.0119653	0	0	12	0	0	1.2	0	Random Only
'EX_galfucgalacglcgal14acglcgalgluside_hs(e)'	1	1	1	1	0.998249	0.0119653	0	0	12	0	0	1.2	0	Random Only
'EX_galgalfucfucgalacglcgalacglcgal14acglcgalgluside_hs(e)'	1	1	1	1	0.998249	0.0119653	0	0	12	0	0	1.2	0	Random Only
'EX_galgalgalthcrm_hs(e)'	1	1	1	1	0.998249	0.0119653	0	0	12	0	0	1.2	0	Random Only
'EX_gam(e)'	1	1	1	1	0.998249	0.0119653	0	0	12	0	0	1.2	0	Random Only
'EX_gbside_hs(e)'	1	1	1	1	0.998249	0.0119653	0	0	12	0	0	1.2	0	Random Only
'EX_gchola(e)'	1	1	1	1	0.998249	0.0119653	0	0	12	0	0	1.2	0	Random Only
'EX_gd1b2_hs(e)'	1	1	1	1	0.998249	0.0119653	0	0	12	0	0	1.2	0	Random Only
'EX_gd1c_hs(e)'	1	1	1	1	0.998249	0.0119653	0	0	12	0	0	1.2	0	Random Only
'EX_gdchola(e)'	1	1	1	1	0.998249	0.0119653	0	0	12	0	0	1.2	0	Random Only
'EX_gdp(e)'	1	1	1	1	0.998249	0.0119653	0	0	12	0	0	1.2	0	Random Only
'EX_glc(e)'	0.992926	0.0587607	1	1	0.998249	0.0119653	3	0	12	1.43541	0	1.2	0	Random Only
'EX_gln-L(e)'	0.988598	0.0628024	1	1	0.997324	0.0139157	6	0	20	2.87081	0	2	0	Random Only
'EX_glu-L(e)'	0.988598	0.0628024	1	1	0.997324	0.0139157	6	0	20	2.87081	0	2	0	Random Only
'EX_gluala(e)'	0.988598	0.0628024	1	1	0.997324	0.0139157	6	0	20	2.87081	0	2	0	Random Only
'EX_gly(e)'	0.988598	0.0628024	1	1	0.997324	0.0139157	6	0	20	2.87081	0	2	0	Random Only
'EX_glyb(e)'	0.992824	0.0596074	1	1	0.998249	0.0119653	3	0	12	1.43541	0	1.2	0	Random Only
'EX_glyc(e)'	0.994688	0.0441257	1	1	0.998249	0.0119653	3	0	12	1.43541	0	1.2	0	Random Only
'EX_glyc-S(e)'	1	1	1	1	0.998249	0.0119653	0	0	12	0	0	1.2	0	Random Only
'EX_glygn2(e)'	1	1	1	1	0.998249	0.0119653	0	0	12	0	0	1.2	0	Random Only
'EX_glygn4(e)'	1	1	1	1	0.998249	0.0119653	0	0	12	0	0	1.2	0	Random Only
'EX_glygn5(e)'	1	1	1	1	0.998249	0.0119653	0	0	12	0	0	1.2	0	Random Only
'EX_gmp(e)'	1	1	1	1	0.998249	0.0119653	0	0	12	0	0	1.2	0	Random Only
'EX_gp1c_hs(e)'	1	1	1	1	0.998249	0.0119653	0	0	12	0	0	1.2	0	Random Only
'EX_gp1calpha_hs(e)'	1	1	1	1	0.998249	0.0119653	0	0	12	0	0	1.2	0	Random Only
'EX_gq1b_hs(e)'	1	1	1	1	0.998249	0.0119653	0	0	12	0	0	1.2	0	Random Only
'EX_gq1balpha_hs(e)'	1	1	1	1	0.998249	0.0119653	0	0	12	0	0	1.2	0	Random Only
'EX_gsn(e)'	0.988598	0.0628024	1	1	0.997324	0.0139157	6	0	20	2.87081	0	2	0	Random Only
'EX_gt1a_hs(e)'	1	1	1	1	0.998249	0.0119653	0	0	12	0	0	1.2	0	Random Only
'EX_gthox(e)'	1	1	1	1	0.998249	0.0119653	0	0	12	0	0	1.2	0	Random Only
'EX_gthrd(e)'	1	1	1	1	0.998249	0.0119653	0	0	12	0	0	1.2	0	Random Only
'EX_gtp(e)'	1	1	1	1	0.998249	0.0119653	0	0	12	0	0	1.2	0	Random Only
'EX_gua(e)'	0.988598	0.0628024	1	1	0.997324	0.0139157	6	0	20	2.87081	0	2	0	Random Only
'EX_h(e)'	0.991864	0.056521	1	1	0.998249	0.0119653	6	0	12	2.87081	0	1.2	0	Random Only
'EX_h2o(e)'	0.992836	0.0595066	1	1	0.998249	0.0119653	3	0	12	1.43541	0	1.2	0	Random Only
'EX_h2o2(e)'	0.992823	0.0596155	1	1	0.998249	0.0119653	3	0	12	1.43541	0	1.2	0	Random Only
'EX_ha(e)'	0.993542	0.0536423	1	1	0.998249	0.0119653	3	0	12	1.43541	0	1.2	0	Random Only
'EX_ha_pre1(e)'	0.993542	0.0536423	1	1	0.998249	0.0119653	3	0	12	1.43541	0	1.2	0	Random Only
'EX_hco3(e)'	0.993037	0.0578014	1	1	0.998249	0.0119653	3	0	12	1.43541	0	1.2	0	Random Only
'EX_hcoumarin(e)'	1	1	1	1	0.998249	0.0119653	0	0	12	0	0	1.2	0	Random Only
'EX_hdca(e)'	0.99379	0.0466844	1	1	0.998249	0.0119653	5	0	12	2.39234	0	1.2	0	Random Only
'EX_hdcea(e)'	0.994957	0.0420759	1	1	0.998249	0.0119653	3	0	12	1.43541	0	1.2	0	Random Only
'EX_hestratriol(e)'	1	1	1	1	0.998249	0.0119653	0	0	12	0	0	1.2	0	Random Only
'EX_hexc(e)'	1	1	1	1	0.998249	0.0119653	0	0	12	0	0	1.2	0	Random Only
'EX_his-L(e)'	0.980052	0.068395	1	1	0.937575	0.0481148	29	0	555	13.8756	0	55.5	0	Random Only
'EX_hista(e)'	0.980052	0.068395	1	1	0.937575	0.0481148	29	0	555	13.8756	0	55.5	0	Random Only
'EX_hom-L(e)'	1	1	1	1	0.998249	0.0119653	0	0	12	0	0	1.2	0	Random Only
'EX_hpdca(e)'	1	1	1	1	0.998249	0.0119653	0	0	12	0	0	1.2	0	Random Only
'EX_hspg(e)'	1	1	1	1	0.998249	0.0119653	0	0	12	0	0	1.2	0	Random Only
'EX_hxan(e)'	0.988598	0.0628024	1	1	0.997324	0.0139157	6	0	20	2.87081	0	2	0	Random Only
'EX_i(e)'	1	1	1	1	0.998249	0.0119653	0	0	12	0	0	1.2	0	Random Only
'EX_idp(e)'	1	1	1	1	0.998249	0.0119653	0	0	12	0	0	1.2	0	Random Only
'EX_ile-L(e)'	0.174653	0.364624	0	0	0.0342663	0.180053	182	6000	967	87.0813	100	96.7	1	Both
'EX_imp(e)'	1	1	1	1	0.998249	0.0119653	0	0	12	0	0	1.2	0	Random Only
'EX_inost(e)'	0.992858	0.0593256	1	1	0.998249	0.0119653	3	0	12	1.43541	0	1.2	0	Random Only
'EX_ins(e)'	0.988598	0.0628024	1	1	0.997324	0.0139157	6	0	20	2.87081	0	2	0	Random Only
'EX_k(e)'	1	1	1	1	0.998249	0.0119653	0	0	12	0	0	1.2	0	Random Only
'EX_ksi(e)'	1	1	1	1	0.998249	0.0119653	0	0	12	0	0	1.2	0	Random Only
'EX_ksi_deg1(e)'	1	1	1	1	0.998249	0.0119653	0	0	12	0	0	1.2	0	Random Only
'EX_ksii_core2(e)'	1	1	1	1	0.998249	0.0119653	0	0	12	0	0	1.2	0	Random Only
'EX_ksii_core4(e)'	1	1	1	1	0.998249	0.0119653	0	0	12	0	0	1.2	0	Random Only
'EX_lac-D(e)'	0.993181	0.0566381	1	1	0.998249	0.0119653	3	0	12	1.43541	0	1.2	0	Random Only
'EX_lac-L(e)'	0.992795	0.0593858	1	1	0.998249	0.0119653	3	0	12	1.43541	0	1.2	0	Random Only
'EX_lcts(e)'	0.993547	0.0536011	1	1	0.998249	0.0119653	3	0	12	1.43541	0	1.2	0	Random Only
'EX_leu-L(e)'	0.99258	0.0596549	1	1	0.998249	0.0119653	3	0	12	1.43541	0	1.2	0	Random Only
'EX_leuktrA4(e)'	1	1	1	1	0.998249	0.0119653	0	0	12	0	0	1.2	0	Random Only
'EX_leuktrB4(e)'	1	1	1	1	0.998249	0.0119653	0	0	12	0	0	1.2	0	Random Only
'EX_leuktrC4(e)'	1	1	1	1	0.998249	0.0119653	0	0	12	0	0	1.2	0	Random Only
'EX_leuktrD4(e)'	1	1	1	1	0.998249	0.0119653	0	0	12	0	0	1.2	0	Random Only
'EX_leuktrE4(e)'	1	1	1	1	0.998249	0.0119653	0	0	12	0	0	1.2	0	Random Only
'EX_leuktrF4(e)'	1	1	1	1	0.998249	0.0119653	0	0	12	0	0	1.2	0	Random Only
'EX_lgnc(e)'	1	1	1	1	0.998249	0.0119653	0	0	12	0	0	1.2	0	Random Only
'EX_lipoate(e)'	1	1	1	1	0.998249	0.0119653	0	0	12	0	0	1.2	0	Random Only
'EX_lneldc(e)'	0.995253	0.0390858	1	1	0.998249	0.0119653	4	0	12	1.91388	0	1.2	0	Random Only
'EX_lnlc(e)'	1	1	1	1	0.998249	0.0119653	0	0	12	0	0	1.2	0	Random Only
'EX_lnlnca(e)'	1	1	1	1	0.998249	0.0119653	0	0	12	0	0	1.2	0	Random Only
'EX_lnlncg(e)'	1	1	1	1	0.998249	0.0119653	0	0	12	0	0	1.2	0	Random Only
'EX_lpchol_hs(e)'	0.992854	0.0593546	1	1	0.998249	0.0119653	3	0	12	1.43541	0	1.2	0	Random Only
'EX_lys-L(e)'	0.134338	0.327798	0	0	0.00196772	0.0439774	191	6000	998	91.3876	100	99.8	1	Both
'EX_mag_hs(e)'	0.995006	0.0415414	1	1	0.998249	0.0119653	3	0	12	1.43541	0	1.2	0	Random Only
'EX_malt(e)'	1	1	1	1	0.998249	0.0119653	0	0	12	0	0	1.2	0	Random Only
'EX_man(e)'	0.993503	0.0539632	1	1	0.998249	0.0119653	3	0	12	1.43541	0	1.2	0	Random Only
'EX_meoh(e)'	0.993138	0.0570007	1	1	0.998249	0.0119653	3	0	12	1.43541	0	1.2	0	Random Only
'EX_mepi(e)'	1	1	1	1	0.998249	0.0119653	0	0	12	0	0	1.2	0	Random Only
'EX_mercplaccys(e)'	0.924497	0.0658244	0.933214	0.00258756	0.867811	0.0316938	172	5999	990	82.2967	99.9833	99	0	Both
'EX_met-L(e)'	0.914888	0.070356	0.933214	0.00258756	0.867811	0.0316938	182	5999	990	87.0813	99.9833	99	0	Both
'EX_mthgxl(e)'	0.993181	0.0566381	1	1	0.998249	0.0119653	3	0	12	1.43541	0	1.2	0	Random Only
'EX_n2m2nmasn(e)'	1	1	1	1	0.998249	0.0119653	0	0	12	0	0	1.2	0	Random Only
'EX_na1(e)'	1	1	1	1	0.998249	0.0119653	0	0	12	0	0	1.2	0	Random Only
'EX_nac(e)'	1	1	1	1	0.998249	0.0119653	0	0	12	0	0	1.2	0	Random Only
'EX_nad(e)'	1	1	1	1	0.998249	0.0119653	0	0	12	0	0	1.2	0	Random Only
'EX_nadp(e)'	1	1	1	1	0.998249	0.0119653	0	0	12	0	0	1.2	0	Random Only
'EX_ncam(e)'	1	1	1	1	0.998249	0.0119653	0	0	12	0	0	1.2	0	Random Only
'EX_nh4(e)'	0.987828	0.0631532	1	1	0.997324	0.0139157	8	0	20	3.82775	0	2	0	Random Only
'EX_no(e)'	0.995942	0.0303282	1	1	0.998249	0.0119653	4	0	12	1.91388	0	1.2	0	Random Only
'EX_npthl(e)'	1	1	1	1	0.998249	0.0119653	0	0	12	0	0	1.2	0	Random Only
'EX_nrpphr(e)'	1	1	1	1	0.998249	0.0119653	0	0	12	0	0	1.2	0	Random Only
'EX_nrpphrsf(e)'	1	1	1	1	0.998249	0.0119653	0	0	12	0	0	1.2	0	Random Only
'EX_nrvnc(e)'	1	1	1	1	0.998249	0.0119653	0	0	12	0	0	1.2	0	Random Only
'EX_o2(e)'	0.998416	0.0115214	1	1	0.998249	0.0119653	4	0	12	1.91388	0	1.2	0	Random Only
'EX_o2s(e)'	0.992823	0.0596155	1	1	0.998249	0.0119653	3	0	12	1.43541	0	1.2	0	Random Only
'EX_oagd3_hs(e)'	1	1	1	1	0.998249	0.0119653	0	0	12	0	0	1.2	0	Random Only
'EX_oagt3_hs(e)'	1	1	1	1	0.998249	0.0119653	0	0	12	0	0	1.2	0	Random Only
'EX_ocdca(e)'	1	1	1	1	0.998249	0.0119653	0	0	12	0	0	1.2	0	Random Only
'EX_ocdcea(e)'	1	1	1	1	0.998249	0.0119653	0	0	12	0	0	1.2	0	Random Only
'EX_octa(e)'	1	1	1	1	0.998249	0.0119653	0	0	12	0	0	1.2	0	Random Only
'EX_oh1'	1	1	1	1	0.998249	0.0119653	0	0	12	0	0	1.2	0	Random Only
'EX_onpthl(e)'	1	1	1	1	0.998249	0.0119653	0	0	12	0	0	1.2	0	Random Only
'EX_orn(e)'	1	1	1	1	0.998249	0.0119653	0	0	12	0	0	1.2	0	Random Only
'EX_oxa(e)'	1	1	1	1	0.998249	0.0119653	0	0	12	0	0	1.2	0	Random Only
'EX_paf_hs(e)'	1	1	1	1	0.998249	0.0119653	0	0	12	0	0	1.2	0	Random Only
'EX_pchol_hs(e)'	0.993676	0.0534587	1	1	0.998249	0.0119653	3	0	12	1.43541	0	1.2	0	Random Only
'EX_pe_hs(e)'	0.994332	0.0474013	1	1	0.998249	0.0119653	3	0	12	1.43541	0	1.2	0	Random Only
'EX_peplys(e)'	1	1	1	1	0.998249	0.0119653	0	0	12	0	0	1.2	0	Random Only
'EX_pglyc_hs(e)'	0.993996	0.0500141	1	1	0.998249	0.0119653	3	0	12	1.43541	0	1.2	0	Random Only
'EX_phe-L(e)'	0.986062	0.0667414	1	1	0.998249	0.0119653	13	0	12	6.2201	0	1.2	0	Random Only
'EX_pheme(e)'	1	1	1	1	0.998249	0.0119653	0	0	12	0	0	1.2	0	Random Only
'EX_phyQ(e)'	1	1	1	1	0.998249	0.0119653	0	0	12	0	0	1.2	0	Random Only
'EX_phyt(e)'	1	1	1	1	0.998249	0.0119653	0	0	12	0	0	1.2	0	Random Only
'EX_pi(e)'	0.948097	0.0733232	1	1	0.972384	0.0572371	46	0	191	22.0096	0	19.1	1	Random Only
'EX_pnto-R(e)'	1	1	1	1	0.998249	0.0119653	0	0	12	0	0	1.2	0	Random Only
'EX_ppa(e)'	1	1	1	1	0.998249	0.0119653	0	0	12	0	0	1.2	0	Random Only
'EX_prgstrn(e)'	1	1	1	1	0.998249	0.0119653	0	0	12	0	0	1.2	0	Random Only
'EX_pro-D(e)'	1	1	1	1	0.998249	0.0119653	0	0	12	0	0	1.2	0	Random Only
'EX_pro-L(e)'	0.988598	0.0628024	1	1	0.997324	0.0139157	6	0	20	2.87081	0	2	0	Random Only
'EX_prostgd2(e)'	1	1	1	1	0.998249	0.0119653	0	0	12	0	0	1.2	0	Random Only
'EX_prostge1(e)'	1	1	1	1	0.998249	0.0119653	0	0	12	0	0	1.2	0	Random Only
'EX_prostge2(e)'	1	1	1	1	0.998249	0.0119653	0	0	12	0	0	1.2	0	Random Only
'EX_prostgf2(e)'	1	1	1	1	0.998249	0.0119653	0	0	12	0	0	1.2	0	Random Only
'EX_ps_hs(e)'	0.994539	0.0458601	1	1	0.998249	0.0119653	3	0	12	1.43541	0	1.2	0	Random Only
'EX_ptdca(e)'	1	1	1	1	0.998249	0.0119653	0	0	12	0	0	1.2	0	Random Only
'EX_pydam(e)'	1	1	1	1	0.998249	0.0119653	0	0	12	0	0	1.2	0	Random Only
'EX_pydx(e)'	1	1	1	1	0.998249	0.0119653	0	0	12	0	0	1.2	0	Random Only
'EX_pydxn(e)'	1	1	1	1	0.998249	0.0119653	0	0	12	0	0	1.2	0	Random Only
'EX_pyr(e)'	0.992823	0.0596155	1	1	0.998249	0.0119653	3	0	12	1.43541	0	1.2	0	Random Only
'EX_retfa(e)'	1	1	1	1	0.998249	0.0119653	0	0	12	0	0	1.2	0	Random Only
'EX_retinol(e)'	1	1	1	1	0.998249	0.0119653	0	0	12	0	0	1.2	0	Random Only
'EX_retinol-9-cis(e)'	1	1	1	1	0.998249	0.0119653	0	0	12	0	0	1.2	0	Random Only
'EX_retinol-cis-11(e)'	1	1	1	1	0.998249	0.0119653	0	0	12	0	0	1.2	0	Random Only
'EX_retn(e)'	1	1	1	1	0.998249	0.0119653	0	0	12	0	0	1.2	0	Random Only
'EX_retnglc(e)'	1	1	1	1	0.998249	0.0119653	0	0	12	0	0	1.2	0	Random Only
'EX_retpalm(e)'	1	1	1	1	0.998249	0.0119653	0	0	12	0	0	1.2	0	Random Only
'EX_rib-D(e)'	1	1	1	1	0.998249	0.0119653	0	0	12	0	0	1.2	0	Random Only
'EX_ribflv(e)'	1	1	1	1	0.998249	0.0119653	0	0	12	0	0	1.2	0	Random Only
'EX_s2l2fn2m2masn(e)'	1	1	1	1	0.998249	0.0119653	0	0	12	0	0	1.2	0	Random Only
'EX_s2l2n2m2masn(e)'	1	1	1	1	0.998249	0.0119653	0	0	12	0	0	1.2	0	Random Only
'EX_sarcs(e)'	1	1	1	1	0.998249	0.0119653	0	0	12	0	0	1.2	0	Random Only
'EX_sel(e)'	1	1	1	1	0.998249	0.0119653	0	0	12	0	0	1.2	0	Random Only
'EX_ser-D(e)'	1	1	1	1	0.998249	0.0119653	0	0	12	0	0	1.2	0	Random Only
'EX_ser-L(e)'	0.988598	0.0628024	1	1	0.997324	0.0139157	6	0	20	2.87081	0	2	0	Random Only
'EX_sl-L(e)'	1	1	1	1	0.998249	0.0119653	0	0	12	0	0	1.2	0	Random Only
'EX_so4(e)'	0.990592	0.0622392	1	1	0.998249	0.0119653	6	0	12	2.87081	0	1.2	0	Random Only
'EX_spc_hs(e)'	0.992881	0.0586641	1	1	0.998249	0.0119653	3	0	12	1.43541	0	1.2	0	Random Only
'EX_sph1p(e)'	0.992073	0.0423078	1	1	0.998127	0.0122441	6	0	13	2.87081	0	1.3	0	Random Only
'EX_sphs1p(e)'	0.992276	0.0512033	1	1	0.998223	0.0119909	6	0	12	2.87081	0	1.2	0	Random Only
'EX_srtn(e)'	0.9909	0.0618087	1	1	0.793342	0.0994563	6	0	883	2.87081	0	88.3	1	Random Only
'EX_strch1(e)'	1	1	1	1	0.998249	0.0119653	0	0	12	0	0	1.2	0	Random Only
'EX_strch2(e)'	1	1	1	1	0.998249	0.0119653	0	0	12	0	0	1.2	0	Random Only
'EX_strdnc(e)'	1	1	1	1	0.998249	0.0119653	0	0	12	0	0	1.2	0	Random Only
'EX_succ(e)'	0.990691	0.0620922	1	1	0.998245	0.0119654	6	0	12	2.87081	0	1.2	0	Random Only
'EX_tag_hs(e)'	0.995353	0.0414567	1	1	0.998249	0.0119653	3	0	12	1.43541	0	1.2	0	Random Only
'EX_tagat-D(e)'	1	1	1	1	0.998249	0.0119653	0	0	12	0	0	1.2	0	Random Only
'EX_taur(e)'	0.926834	0.0665961	0.933214	0.00258756	0.867811	0.0316938	167	5999	990	79.9043	99.9833	99	0	Both
'EX_tchola(e)'	1	1	1	1	0.998249	0.0119653	0	0	12	0	0	1.2	0	Random Only
'EX_tcynt(e)'	1	1	1	1	0.998249	0.0119653	0	0	12	0	0	1.2	0	Random Only
'EX_tdchola(e)'	1	1	1	1	0.998249	0.0119653	0	0	12	0	0	1.2	0	Random Only
'EX_tethex3(e)'	1	1	1	1	0.998249	0.0119653	0	0	12	0	0	1.2	0	Random Only
'EX_tetpent3(e)'	1	1	1	1	0.998249	0.0119653	0	0	12	0	0	1.2	0	Random Only
'EX_tetpent6(e)'	1	1	1	1	0.998249	0.0119653	0	0	12	0	0	1.2	0	Random Only
'EX_tettet6(e)'	1	1	1	1	0.998249	0.0119653	0	0	12	0	0	1.2	0	Random Only
'EX_thf(e)'	1	1	1	1	0.998249	0.0119653	0	0	12	0	0	1.2	0	Random Only
'EX_thm(e)'	1	1	1	1	0.998249	0.0119653	0	0	12	0	0	1.2	0	Random Only
'EX_thmmp(e)'	1	1	1	1	0.998249	0.0119653	0	0	12	0	0	1.2	0	Random Only
'EX_thmtp(e)'	1	1	1	1	0.998249	0.0119653	0	0	12	0	0	1.2	0	Random Only
'EX_thr-L(e)'	0.941065	0.0668108	0.950137	0.00233006	0.984793	0.025765	37	612	130	17.7033	10.2	13	1	Both
'EX_thym(e)'	0.988598	0.0628024	1	1	0.997842	0.012787	6	0	15	2.87081	0	1.5	0	Random Only
'EX_thymd(e)'	1	1	1	1	0.998249	0.0119653	0	0	12	0	0	1.2	0	Random Only
'EX_thyox-L(e)'	1	1	1	1	0.998249	0.0119653	0	0	12	0	0	1.2	0	Random Only
'EX_tmndnc(e)'	1	1	1	1	0.998249	0.0119653	0	0	12	0	0	1.2	0	Random Only
'EX_tre(e)'	1	1	1	1	0.998249	0.0119653	0	0	12	0	0	1.2	0	Random Only
'EX_triodthy(e)'	1	1	1	1	0.998249	0.0119653	0	0	12	0	0	1.2	0	Random Only
'EX_triodthysuf(e)'	1	1	1	1	0.998249	0.0119653	0	0	12	0	0	1.2	0	Random Only
'EX_trp-L(e)'	0.98699	0.0655516	1	1	0.793342	0.0994563	12	0	883	5.74163	0	88.3	1	Random Only
'EX_tststerone(e)'	1	1	1	1	0.998249	0.0119653	0	0	12	0	0	1.2	0	Random Only
'EX_tststeroneglc(e)'	1	1	1	1	0.998249	0.0119653	0	0	12	0	0	1.2	0	Random Only
'EX_tsul(e)'	1	1	1	1	0.998249	0.0119653	0	0	12	0	0	1.2	0	Random Only
'EX_ttdca(e)'	1	1	1	1	0.998249	0.0119653	0	0	12	0	0	1.2	0	Random Only
'EX_txa2(e)'	1	1	1	1	0.998249	0.0119653	0	0	12	0	0	1.2	0	Random Only
'EX_tymsf(e)'	0.990592	0.0622392	1	1	0.998249	0.0119653	6	0	12	2.87081	0	1.2	0	Random Only
'EX_tyr-L(e)'	0.990592	0.0622392	1	1	0.998249	0.0119653	6	0	12	2.87081	0	1.2	0	Random Only
'EX_udp(e)'	1	1	1	1	0.998249	0.0119653	0	0	12	0	0	1.2	0	Random Only
'EX_ump(e)'	1	1	1	1	0.998249	0.0119653	0	0	12	0	0	1.2	0	Random Only
'EX_ura(e)'	0.988598	0.0628024	1	1	0.997329	0.0139039	6	0	19	2.87081	0	1.9	0	Random Only
'EX_urate(e)'	1	1	1	1	0.998249	0.0119653	0	0	12	0	0	1.2	0	Random Only
'EX_urea(e)'	0.98951	0.0624657	1	1	0.997642	0.013119	6	0	15	2.87081	0	1.5	0	Random Only
'EX_uri(e)'	0.988637	0.0628053	1	1	0.998132	0.0122299	6	0	13	2.87081	0	1.3	0	Random Only
'EX_utp(e)'	1	1	1	1	0.998249	0.0119653	0	0	12	0	0	1.2	0	Random Only
'EX_vacc(e)'	0.995252	0.0394555	1	1	0.998249	0.0119653	3	0	12	1.43541	0	1.2	0	Random Only
'EX_val-L(e)'	0.950707	0.0709882	1	1	0.99084	0.0167433	38	0	12	18.1818	0	1.2	0	Random Only
'EX_vitd2(e)'	1	1	1	1	0.998249	0.0119653	0	0	12	0	0	1.2	0	Random Only
'EX_vitd3(e)'	0.993138	0.0570007	1	1	0.998249	0.0119653	3	0	12	1.43541	0	1.2	0	Random Only
'EX_xolest_hs(e)'	0.993097	0.0573411	1	1	0.998249	0.0119653	3	0	12	1.43541	0	1.2	0	Random Only
'EX_xoltri24(e)'	1	1	1	1	0.998249	0.0119653	0	0	12	0	0	1.2	0	Random Only
'EX_xoltri25(e)'	1	1	1	1	0.998249	0.0119653	0	0	12	0	0	1.2	0	Random Only
'EX_xoltri27(e)'	0.993204	0.0564492	1	1	0.998249	0.0119653	3	0	12	1.43541	0	1.2	0	Random Only
'EX_xylt(e)'	0.9934	0.0548234	1	1	0.998249	0.0119653	3	0	12	1.43541	0	1.2	0	Random Only
'EX_yvite(e)'	1	1	1	1	0.998249	0.0119653	0	0	12	0	0	1.2	0	Random Only
'F1Atg'	1	1	1	1	0.998249	0.0119653	0	0	12	0	0	1.2	0	Random Only
'F1PGT'	1	1	1	1	0.998249	0.0119653	0	0	12	0	0	1.2	0	Random Only
'F6Tg'	1	1	1	1	0.998249	0.0119653	0	0	12	0	0	1.2	0	Random Only
'FACOAL140i'	1	1	1	1	0.998249	0.0119653	0	0	12	0	0	1.2	0	Random Only
'FACOAL150'	1	1	1	1	0.998249	0.0119653	0	0	12	0	0	1.2	0	Random Only
'FACOAL160i'	0.991918	0.0590236	1	1	0.998249	0.0119653	5	0	12	2.39234	0	1.2	0	Random Only
'FACOAL161'	0.994957	0.0420759	1	1	0.998249	0.0119653	3	0	12	1.43541	0	1.2	0	Random Only
'FACOAL170'	1	1	1	1	0.998249	0.0119653	0	0	12	0	0	1.2	0	Random Only
'FACOAL180i'	1	1	1	1	0.998249	0.0119653	0	0	12	0	0	1.2	0	Random Only
'FACOAL1812'	0.995252	0.0394555	1	1	0.998249	0.0119653	3	0	12	1.43541	0	1.2	0	Random Only
'FACOAL1813'	0.995252	0.0394555	1	1	0.998249	0.0119653	3	0	12	1.43541	0	1.2	0	Random Only
'FACOAL181i'	1	1	1	1	0.998249	0.0119653	0	0	12	0	0	1.2	0	Random Only
'FACOAL1821'	1	1	1	1	0.998249	0.0119653	0	0	12	0	0	1.2	0	Random Only
'FACOAL1822'	0.995253	0.0390858	1	1	0.998249	0.0119653	4	0	12	1.91388	0	1.2	0	Random Only
'FACOAL1831'	1	1	1	1	0.998249	0.0119653	0	0	12	0	0	1.2	0	Random Only
'FACOAL1832'	1	1	1	1	0.998249	0.0119653	0	0	12	0	0	1.2	0	Random Only
'FACOAL184'	1	1	1	1	0.998249	0.0119653	0	0	12	0	0	1.2	0	Random Only
'FACOAL191'	0.992823	0.0596155	1	1	0.998249	0.0119653	3	0	12	1.43541	0	1.2	0	Random Only
'FACOAL200'	1	1	1	1	0.998249	0.0119653	0	0	12	0	0	1.2	0	Random Only
'FACOAL203'	1	1	1	1	0.998249	0.0119653	0	0	12	0	0	1.2	0	Random Only
'FACOAL204'	1	1	1	1	0.998249	0.0119653	0	0	12	0	0	1.2	0	Random Only
'FACOAL2042'	1	1	1	1	0.998249	0.0119653	0	0	12	0	0	1.2	0	Random Only
'FACOAL204i'	1	1	1	1	0.998249	0.0119653	0	0	12	0	0	1.2	0	Random Only
'FACOAL205'	1	1	1	1	0.998249	0.0119653	0	0	12	0	0	1.2	0	Random Only
'FACOAL206'	1	1	1	1	0.998249	0.0119653	0	0	12	0	0	1.2	0	Random Only
'FACOAL224'	1	1	1	1	0.998249	0.0119653	0	0	12	0	0	1.2	0	Random Only
'FACOAL2251'	1	1	1	1	0.998249	0.0119653	0	0	12	0	0	1.2	0	Random Only
'FACOAL2252'	1	1	1	1	0.998249	0.0119653	0	0	12	0	0	1.2	0	Random Only
'FACOAL226'	1	1	1	1	0.998249	0.0119653	0	0	12	0	0	1.2	0	Random Only
'FACOAL226i'	1	1	1	1	0.998249	0.0119653	0	0	12	0	0	1.2	0	Random Only
'FACOAL240'	1	1	1	1	0.998249	0.0119653	0	0	12	0	0	1.2	0	Random Only
'FACOAL241'	1	1	1	1	0.998249	0.0119653	0	0	12	0	0	1.2	0	Random Only
'FACOAL244_1'	1	1	1	1	0.998249	0.0119653	0	0	12	0	0	1.2	0	Random Only
'FACOAL245_1'	1	1	1	1	0.998249	0.0119653	0	0	12	0	0	1.2	0	Random Only
'FACOAL245_2'	1	1	1	1	0.998249	0.0119653	0	0	12	0	0	1.2	0	Random Only
'FACOAL246_1'	1	1	1	1	0.998249	0.0119653	0	0	12	0	0	1.2	0	Random Only
'FACOAL260'	1	1	1	1	0.998249	0.0119653	0	0	12	0	0	1.2	0	Random Only
'FACOAL80i'	1	1	1	1	0.998249	0.0119653	0	0	12	0	0	1.2	0	Random Only
'FADH2tru'	0.993138	0.0570007	1	1	0.998249	0.0119653	3	0	12	1.43541	0	1.2	0	Random Only
'FADH2tx'	1	1	1	1	0.998249	0.0119653	0	0	12	0	0	1.2	0	Random Only
'FADtru'	0.993138	0.0570007	1	1	0.998249	0.0119653	3	0	12	1.43541	0	1.2	0	Random Only
'FADtx'	1	1	1	1	0.998249	0.0119653	0	0	12	0	0	1.2	0	Random Only
'FALDH'	0.993138	0.0570007	1	1	0.998249	0.0119653	3	0	12	1.43541	0	1.2	0	Random Only
'FALDtly'	0.992823	0.0596155	1	1	0.998249	0.0119653	3	0	12	1.43541	0	1.2	0	Random Only
'FALDtm'	1	1	1	1	0.998249	0.0119653	0	0	12	0	0	1.2	0	Random Only
'FAOXC11'	1	1	1	1	0.998249	0.0119653	0	0	12	0	0	1.2	0	Random Only
'FAOXC140'	1	1	1	1	0.998249	0.0119653	0	0	12	0	0	1.2	0	Random Only
'FAOXC150m'	1	1	1	1	0.998249	0.0119653	0	0	12	0	0	1.2	0	Random Only
'FAOXC160'	0.991404	0.0611793	1	1	0.998249	0.0119653	5	0	12	2.39234	0	1.2	0	Random Only
'FAOXC16080m'	0.991404	0.0611793	1	1	0.998249	0.0119653	5	0	12	2.39234	0	1.2	0	Random Only
'FAOXC16080x'	1	1	1	1	0.998249	0.0119653	0	0	12	0	0	1.2	0	Random Only
'FAOXC161802m'	1	1	1	1	0.998249	0.0119653	0	0	12	0	0	1.2	0	Random Only
'FAOXC16180m'	1	1	1	1	0.998249	0.0119653	0	0	12	0	0	1.2	0	Random Only
'FAOXC170m'	1	1	1	1	0.998249	0.0119653	0	0	12	0	0	1.2	0	Random Only
'FAOXC180'	0.991404	0.0611793	1	1	0.998249	0.0119653	5	0	12	2.39234	0	1.2	0	Random Only
'FAOXC180x'	1	1	1	1	0.998249	0.0119653	0	0	12	0	0	1.2	0	Random Only
'FAOXC1811601m'	1	1	1	1	0.998249	0.0119653	0	0	12	0	0	1.2	0	Random Only
'FAOXC1811602m'	1	1	1	1	0.998249	0.0119653	0	0	12	0	0	1.2	0	Random Only
'FAOXC1811603m'	0.991408	0.0611693	1	1	0.998249	0.0119653	5	0	12	2.39234	0	1.2	0	Random Only
'FAOXC182806m'	1	1	1	1	0.998249	0.0119653	0	0	12	0	0	1.2	0	Random Only
'FAOXC18280m'	1	1	1	1	0.998249	0.0119653	0	0	12	0	0	1.2	0	Random Only
'FAOXC183803m'	1	1	1	1	0.998249	0.0119653	0	0	12	0	0	1.2	0	Random Only
'FAOXC183806m'	1	1	1	1	0.998249	0.0119653	0	0	12	0	0	1.2	0	Random Only
'FAOXC183806x'	1	1	1	1	0.998249	0.0119653	0	0	12	0	0	1.2	0	Random Only
'FAOXC18480m'	1	1	1	1	0.998249	0.0119653	0	0	12	0	0	1.2	0	Random Only
'FAOXC18480x'	1	1	1	1	0.998249	0.0119653	0	0	12	0	0	1.2	0	Random Only
'FAOXC200180m'	1	1	1	1	0.998249	0.0119653	0	0	12	0	0	1.2	0	Random Only
'FAOXC200180x'	1	1	1	1	0.998249	0.0119653	0	0	12	0	0	1.2	0	Random Only
'FAOXC2031836m'	1	1	1	1	0.998249	0.0119653	0	0	12	0	0	1.2	0	Random Only
'FAOXC204'	1	1	1	1	0.998249	0.0119653	0	0	12	0	0	1.2	0	Random Only
'FAOXC204184m'	1	1	1	1	0.998249	0.0119653	0	0	12	0	0	1.2	0	Random Only
'FAOXC2051843m'	1	1	1	1	0.998249	0.0119653	0	0	12	0	0	1.2	0	Random Only
'FAOXC2051843x'	1	1	1	1	0.998249	0.0119653	0	0	12	0	0	1.2	0	Random Only
'FAOXC2242046m'	1	1	1	1	0.998249	0.0119653	0	0	12	0	0	1.2	0	Random Only
'FAOXC2242046x'	1	1	1	1	0.998249	0.0119653	0	0	12	0	0	1.2	0	Random Only
'FAOXC2251836m'	1	1	1	1	0.998249	0.0119653	0	0	12	0	0	1.2	0	Random Only
'FAOXC2251836x'	1	1	1	1	0.998249	0.0119653	0	0	12	0	0	1.2	0	Random Only
'FAOXC2252053m'	1	1	1	1	0.998249	0.0119653	0	0	12	0	0	1.2	0	Random Only
'FAOXC2252053x'	1	1	1	1	0.998249	0.0119653	0	0	12	0	0	1.2	0	Random Only
'FAOXC226'	1	1	1	1	0.998249	0.0119653	0	0	12	0	0	1.2	0	Random Only
'FAOXC226205m'	1	1	1	1	0.998249	0.0119653	0	0	12	0	0	1.2	0	Random Only
'FAOXC226205x'	1	1	1	1	0.998249	0.0119653	0	0	12	0	0	1.2	0	Random Only
'FAOXC240200x'	1	1	1	1	0.998249	0.0119653	0	0	12	0	0	1.2	0	Random Only
'FAOXC241181x'	1	1	1	1	0.998249	0.0119653	0	0	12	0	0	1.2	0	Random Only
'FAOXC2442246x'	1	1	1	1	0.998249	0.0119653	0	0	12	0	0	1.2	0	Random Only
'FAOXC2452253x'	1	1	1	1	0.998249	0.0119653	0	0	12	0	0	1.2	0	Random Only
'FAOXC2452256x'	1	1	1	1	0.998249	0.0119653	0	0	12	0	0	1.2	0	Random Only
'FAOXC246226x'	1	1	1	1	0.998249	0.0119653	0	0	12	0	0	1.2	0	Random Only
'FAOXC260240x'	1	1	1	1	0.998249	0.0119653	0	0	12	0	0	1.2	0	Random Only
'FAOXC80'	0.994368	0.0467916	1	1	0.998249	0.0119653	3	0	12	1.43541	0	1.2	0	Random Only
'FAS100COA'	0.993205	0.0564512	1	1	0.998249	0.0119653	3	0	12	1.43541	0	1.2	0	Random Only
'FAS120COA'	0.993205	0.0564512	1	1	0.998249	0.0119653	3	0	12	1.43541	0	1.2	0	Random Only
'FAS140COA'	0.993205	0.0564512	1	1	0.998249	0.0119653	3	0	12	1.43541	0	1.2	0	Random Only
'FAS160COA'	0.9933	0.0556514	1	1	0.998249	0.0119653	3	0	12	1.43541	0	1.2	0	Random Only
'FAS180COA'	0.993188	0.0565801	1	1	0.998249	0.0119653	3	0	12	1.43541	0	1.2	0	Random Only
'FAS80COA_L'	0.993117	0.0571747	1	1	0.998249	0.0119653	3	0	12	1.43541	0	1.2	0	Random Only
'FATP1t'	1	1	1	1	0.998249	0.0119653	0	0	12	0	0	1.2	0	Random Only
'FATP2t'	1	1	1	1	0.998249	0.0119653	0	0	12	0	0	1.2	0	Random Only
'FATP3t'	1	1	1	1	0.998249	0.0119653	0	0	12	0	0	1.2	0	Random Only
'FATP4t'	1	1	1	1	0.998249	0.0119653	0	0	12	0	0	1.2	0	Random Only
'FATP5t'	1	1	1	1	0.998249	0.0119653	0	0	12	0	0	1.2	0	Random Only
'FATP6t'	1	1	1	1	0.998249	0.0119653	0	0	12	0	0	1.2	0	Random Only
'FATP7t'	1	1	1	1	0.998249	0.0119653	0	0	12	0	0	1.2	0	Random Only
'FATP8t'	1	1	1	1	0.998249	0.0119653	0	0	12	0	0	1.2	0	Random Only
'FATP9t'	1	1	1	1	0.998249	0.0119653	0	0	12	0	0	1.2	0	Random Only
'FBA'	0.992823	0.0596155	1	1	0.998249	0.0119653	3	0	12	1.43541	0	1.2	0	Random Only
'FBA2'	0.992823	0.0596155	1	1	0.998249	0.0119653	3	0	12	1.43541	0	1.2	0	Random Only
'FBA4'	1	1	1	1	0.998249	0.0119653	0	0	12	0	0	1.2	0	Random Only
'FBP'	0.992823	0.0596155	1	1	0.998249	0.0119653	3	0	12	1.43541	0	1.2	0	Random Only
'FBP26'	0.992823	0.0596155	1	1	0.998249	0.0119653	3	0	12	1.43541	0	1.2	0	Random Only
'FCLTm'	1	1	1	1	0.998249	0.0119653	0	0	12	0	0	1.2	0	Random Only
'FE2t'	1	1	1	1	0.998249	0.0119653	0	0	12	0	0	1.2	0	Random Only
'FE2tm'	1	1	1	1	0.998249	0.0119653	0	0	12	0	0	1.2	0	Random Only
'FK'	1	1	1	1	0.998249	0.0119653	0	0	12	0	0	1.2	0	Random Only
'FMNAT'	1	1	1	1	0.998249	0.0119653	0	0	12	0	0	1.2	0	Random Only
'FOLR2'	1	1	1	1	0.998249	0.0119653	0	0	12	0	0	1.2	0	Random Only
'FOLt2'	1	1	1	1	0.998249	0.0119653	0	0	12	0	0	1.2	0	Random Only
'FORt2m'	0.993012	0.0580486	1	1	0.998249	0.0119653	3	0	12	1.43541	0	1.2	0	Random Only
'FORtr'	0.993138	0.0570007	1	1	0.998249	0.0119653	3	0	12	1.43541	0	1.2	0	Random Only
'FORtrn'	1	1	1	1	0.998249	0.0119653	0	0	12	0	0	1.2	0	Random Only
'FPGS'	0.992823	0.0596155	1	1	0.998249	0.0119653	3	0	12	1.43541	0	1.2	0	Random Only
'FPGS2'	0.992823	0.0596155	1	1	0.998249	0.0119653	3	0	12	1.43541	0	1.2	0	Random Only
'FPGS2m'	0.992823	0.0596155	1	1	0.998249	0.0119653	3	0	12	1.43541	0	1.2	0	Random Only
'FPGS3'	0.992823	0.0596155	1	1	0.998249	0.0119653	3	0	12	1.43541	0	1.2	0	Random Only
'FPGS3m'	0.992823	0.0596155	1	1	0.998249	0.0119653	3	0	12	1.43541	0	1.2	0	Random Only
'FPGS4'	0.992823	0.0596155	1	1	0.998249	0.0119653	3	0	12	1.43541	0	1.2	0	Random Only
'FPGS4m'	0.992823	0.0596155	1	1	0.998249	0.0119653	3	0	12	1.43541	0	1.2	0	Random Only
'FPGS5'	0.992823	0.0596155	1	1	0.998249	0.0119653	3	0	12	1.43541	0	1.2	0	Random Only
'FPGS5m'	0.992823	0.0596155	1	1	0.998249	0.0119653	3	0	12	1.43541	0	1.2	0	Random Only
'FPGS6'	0.992823	0.0596155	1	1	0.998249	0.0119653	3	0	12	1.43541	0	1.2	0	Random Only
'FPGS6m'	0.992823	0.0596155	1	1	0.998249	0.0119653	3	0	12	1.43541	0	1.2	0	Random Only
'FPGS7'	0.992823	0.0596155	1	1	0.998249	0.0119653	3	0	12	1.43541	0	1.2	0	Random Only
'FPGS7m'	0.992823	0.0596155	1	1	0.998249	0.0119653	3	0	12	1.43541	0	1.2	0	Random Only
'FPGS8'	0.992823	0.0596155	1	1	0.998249	0.0119653	3	0	12	1.43541	0	1.2	0	Random Only
'FPGS8m'	0.992823	0.0596155	1	1	0.998249	0.0119653	3	0	12	1.43541	0	1.2	0	Random Only
'FPGS9'	0.992823	0.0596155	1	1	0.998249	0.0119653	3	0	12	1.43541	0	1.2	0	Random Only
'FPGS9m'	0.992823	0.0596155	1	1	0.998249	0.0119653	3	0	12	1.43541	0	1.2	0	Random Only
'FPGSm'	0.992823	0.0596155	1	1	0.998249	0.0119653	3	0	12	1.43541	0	1.2	0	Random Only
'FRDPtc'	1	1	1	1	0.998249	0.0119653	0	0	12	0	0	1.2	0	Random Only
'FRDPtr'	0.993138	0.0570007	1	1	0.998249	0.0119653	3	0	12	1.43541	0	1.2	0	Random Only
'FRTT'	1	1	1	1	0.998249	0.0119653	0	0	12	0	0	1.2	0	Random Only
'FRUt1r'	1	1	1	1	0.998249	0.0119653	0	0	12	0	0	1.2	0	Random Only
'FRUt4'	1	1	1	1	0.998249	0.0119653	0	0	12	0	0	1.2	0	Random Only
'FT'	1	1	1	1	0.998249	0.0119653	0	0	12	0	0	1.2	0	Random Only
'FTCD'	0.970983	0.076073	1	1	0.937575	0.0481148	41	0	555	19.6172	0	55.5	0	Random Only
'FTHFCL'	1	1	1	1	0.998249	0.0119653	0	0	12	0	0	1.2	0	Random Only
'FTHFDH'	0.993212	0.0564358	1	1	0.998249	0.0119653	3	0	12	1.43541	0	1.2	0	Random Only
'FTHFL'	0.992998	0.0581644	1	1	0.998249	0.0119653	3	0	12	1.43541	0	1.2	0	Random Only
'FTHFLm'	0.993012	0.0580486	1	1	0.998249	0.0119653	3	0	12	1.43541	0	1.2	0	Random Only
'FUC13GALACGLCGAL14ACGLCGALGLUSIDEte'	1	1	1	1	0.998249	0.0119653	0	0	12	0	0	1.2	0	Random Only
'FUC13GALACGLCGAL14ACGLCGALGLUSIDEtg'	1	1	1	1	0.998249	0.0119653	0	0	12	0	0	1.2	0	Random Only
'FUC14GALACGLCGALGLUSIDEte'	1	1	1	1	0.998249	0.0119653	0	0	12	0	0	1.2	0	Random Only
'FUC14GALACGLCGALGLUSIDEtg'	1	1	1	1	0.998249	0.0119653	0	0	12	0	0	1.2	0	Random Only
'FUCACGALFUCGALACGLCGALGLUSIDEte'	1	1	1	1	0.998249	0.0119653	0	0	12	0	0	1.2	0	Random Only
'FUCACGALFUCGALACGLCGALGLUSIDEtg'	1	1	1	1	0.998249	0.0119653	0	0	12	0	0	1.2	0	Random Only
'FUCACNGAL14ACGLCGALGLUSIDEte'	1	1	1	1	0.998249	0.0119653	0	0	12	0	0	1.2	0	Random Only
'FUCACNGAL14ACGLCGALGLUSIDEtg'	1	1	1	1	0.998249	0.0119653	0	0	12	0	0	1.2	0	Random Only
'FUCACNGALACGLCGALGLUSIDEte'	1	1	1	1	0.998249	0.0119653	0	0	12	0	0	1.2	0	Random Only
'FUCACNGALACGLCGALGLUSIDEtg'	1	1	1	1	0.998249	0.0119653	0	0	12	0	0	1.2	0	Random Only
'FUCASE2e'	1	1	1	1	0.998249	0.0119653	0	0	12	0	0	1.2	0	Random Only
'FUCASE2ly'	1	1	1	1	0.998249	0.0119653	0	0	12	0	0	1.2	0	Random Only
'FUCASEe'	1	1	1	1	0.998249	0.0119653	0	0	12	0	0	1.2	0	Random Only
'FUCASEly'	1	1	1	1	0.998249	0.0119653	0	0	12	0	0	1.2	0	Random Only
'FUCFUC12GAL14ACGLCGALGLUSIDEte'	1	1	1	1	0.998249	0.0119653	0	0	12	0	0	1.2	0	Random Only
'FUCFUC12GAL14ACGLCGALGLUSIDEtg'	1	1	1	1	0.998249	0.0119653	0	0	12	0	0	1.2	0	Random Only
'FUCFUC132GALACGLCGAL14ACGLCGALGLUSIDEte'	1	1	1	1	0.998249	0.0119653	0	0	12	0	0	1.2	0	Random Only
'FUCFUC132GALACGLCGAL14ACGLCGALGLUSIDEtg'	1	1	1	1	0.998249	0.0119653	0	0	12	0	0	1.2	0	Random Only
'FUCFUCFUCGALACGLC13GALACGLCGAL14ACGLCGALGLUSIDEte'	1	1	1	1	0.998249	0.0119653	0	0	12	0	0	1.2	0	Random Only
'FUCFUCFUCGALACGLC13GALACGLCGAL14ACGLCGALGLUSIDEtg'	1	1	1	1	0.998249	0.0119653	0	0	12	0	0	1.2	0	Random Only
'FUCFUCFUCGALACGLCGAL14ACGLCGALGLUSIDEte'	1	1	1	1	0.998249	0.0119653	0	0	12	0	0	1.2	0	Random Only
'FUCFUCFUCGALACGLCGAL14ACGLCGALGLUSIDEtg'	1	1	1	1	0.998249	0.0119653	0	0	12	0	0	1.2	0	Random Only
'FUCFUCGALACGLCGALGLUSIDEte'	1	1	1	1	0.998249	0.0119653	0	0	12	0	0	1.2	0	Random Only
'FUCFUCGALACGLCGALGLUSIDEtg'	1	1	1	1	0.998249	0.0119653	0	0	12	0	0	1.2	0	Random Only
'FUCGAL14ACGLCGALGLUSIDEte'	1	1	1	1	0.998249	0.0119653	0	0	12	0	0	1.2	0	Random Only
'FUCGAL14ACGLCGALGLUSIDEtg'	1	1	1	1	0.998249	0.0119653	0	0	12	0	0	1.2	0	Random Only
'FUCGALFUCGALACGLCGALGLUSIDEte'	1	1	1	1	0.998249	0.0119653	0	0	12	0	0	1.2	0	Random Only
'FUCGALFUCGALACGLCGALGLUSIDEtg'	1	1	1	1	0.998249	0.0119653	0	0	12	0	0	1.2	0	Random Only
'FUCGALGBSIDEte'	1	1	1	1	0.998249	0.0119653	0	0	12	0	0	1.2	0	Random Only
'FUCGALGBSIDEtg'	1	1	1	1	0.998249	0.0119653	0	0	12	0	0	1.2	0	Random Only
'FUCtly'	1	1	1	1	0.998249	0.0119653	0	0	12	0	0	1.2	0	Random Only
'FUM'	1	1	1	1	0.998249	0.0119653	0	0	12	0	0	1.2	0	Random Only
'FUMAC'	1	1	1	1	0.998249	0.0119653	0	0	12	0	0	1.2	0	Random Only
'FUMSO3tm'	1	1	1	1	0.998249	0.0119653	0	0	12	0	0	1.2	0	Random Only
'FUMSO4tm'	1	1	1	1	0.998249	0.0119653	0	0	12	0	0	1.2	0	Random Only
'FUMTSULtm'	1	1	1	1	0.998249	0.0119653	0	0	12	0	0	1.2	0	Random Only
'FUMm'	1	1	1	1	0.998249	0.0119653	0	0	12	0	0	1.2	0	Random Only
'FUMtm'	1	1	1	1	0.998249	0.0119653	0	0	12	0	0	1.2	0	Random Only
'FUT11g'	1	1	1	1	0.998249	0.0119653	0	0	12	0	0	1.2	0	Random Only
'FUT12g'	1	1	1	1	0.998249	0.0119653	0	0	12	0	0	1.2	0	Random Only
'FUT14g'	1	1	1	1	0.998249	0.0119653	0	0	12	0	0	1.2	0	Random Only
'FUT15g'	1	1	1	1	0.998249	0.0119653	0	0	12	0	0	1.2	0	Random Only
'FUT16g'	1	1	1	1	0.998249	0.0119653	0	0	12	0	0	1.2	0	Random Only
'FUT17g'	1	1	1	1	0.998249	0.0119653	0	0	12	0	0	1.2	0	Random Only
'FUT18g'	1	1	1	1	0.998249	0.0119653	0	0	12	0	0	1.2	0	Random Only
'FUT31g'	1	1	1	1	0.998249	0.0119653	0	0	12	0	0	1.2	0	Random Only
'FUT32g'	1	1	1	1	0.998249	0.0119653	0	0	12	0	0	1.2	0	Random Only
'FUT33g'	1	1	1	1	0.998249	0.0119653	0	0	12	0	0	1.2	0	Random Only
'FUT34g'	1	1	1	1	0.998249	0.0119653	0	0	12	0	0	1.2	0	Random Only
'FUT35g'	1	1	1	1	0.998249	0.0119653	0	0	12	0	0	1.2	0	Random Only
'FUT910g'	1	1	1	1	0.998249	0.0119653	0	0	12	0	0	1.2	0	Random Only
'FUT911g'	1	1	1	1	0.998249	0.0119653	0	0	12	0	0	1.2	0	Random Only
'FUT91g'	1	1	1	1	0.998249	0.0119653	0	0	12	0	0	1.2	0	Random Only
'FUT92g'	1	1	1	1	0.998249	0.0119653	0	0	12	0	0	1.2	0	Random Only
'FUT93g'	1	1	1	1	0.998249	0.0119653	0	0	12	0	0	1.2	0	Random Only
'FUT94g'	1	1	1	1	0.998249	0.0119653	0	0	12	0	0	1.2	0	Random Only
'FUT95g'	1	1	1	1	0.998249	0.0119653	0	0	12	0	0	1.2	0	Random Only
'FUT96g'	1	1	1	1	0.998249	0.0119653	0	0	12	0	0	1.2	0	Random Only
'FUT97g'	1	1	1	1	0.998249	0.0119653	0	0	12	0	0	1.2	0	Random Only
'FUT98g'	1	1	1	1	0.998249	0.0119653	0	0	12	0	0	1.2	0	Random Only
'FUT99g'	1	1	1	1	0.998249	0.0119653	0	0	12	0	0	1.2	0	Random Only
'G12MT1_L'	0.992823	0.0596155	1	1	0.998249	0.0119653	3	0	12	1.43541	0	1.2	0	Random Only
'G12MT1_U'	0.992823	0.0596155	1	1	0.998249	0.0119653	3	0	12	1.43541	0	1.2	0	Random Only
'G12MT2_L'	0.992823	0.0596155	1	1	0.998249	0.0119653	3	0	12	1.43541	0	1.2	0	Random Only
'G12MT2_U'	0.992823	0.0596155	1	1	0.998249	0.0119653	3	0	12	1.43541	0	1.2	0	Random Only
'G13MT_L'	0.992823	0.0596155	1	1	0.998249	0.0119653	3	0	12	1.43541	0	1.2	0	Random Only
'G13MT_U'	0.992823	0.0596155	1	1	0.998249	0.0119653	3	0	12	1.43541	0	1.2	0	Random Only
'G14T10g'	1	1	1	1	0.998249	0.0119653	0	0	12	0	0	1.2	0	Random Only
'G14T11g'	1	1	1	1	0.998249	0.0119653	0	0	12	0	0	1.2	0	Random Only
'G14T12g'	1	1	1	1	0.998249	0.0119653	0	0	12	0	0	1.2	0	Random Only
'G14T13g'	1	1	1	1	0.998249	0.0119653	0	0	12	0	0	1.2	0	Random Only
'G14T14g'	1	1	1	1	0.998249	0.0119653	0	0	12	0	0	1.2	0	Random Only
'G14T15g'	1	1	1	1	0.998249	0.0119653	0	0	12	0	0	1.2	0	Random Only
'G14T16g'	1	1	1	1	0.998249	0.0119653	0	0	12	0	0	1.2	0	Random Only
'G14T17g'	1	1	1	1	0.998249	0.0119653	0	0	12	0	0	1.2	0	Random Only
'G14T18g'	1	1	1	1	0.998249	0.0119653	0	0	12	0	0	1.2	0	Random Only
'G14T19g'	1	1	1	1	0.998249	0.0119653	0	0	12	0	0	1.2	0	Random Only
'G14T20g'	1	1	1	1	0.998249	0.0119653	0	0	12	0	0	1.2	0	Random Only
'G14T21g'	1	1	1	1	0.998249	0.0119653	0	0	12	0	0	1.2	0	Random Only
'G14T2g'	0.992847	0.0594144	1	1	0.998249	0.0119653	3	0	12	1.43541	0	1.2	0	Random Only
'G14T3g'	0.992847	0.0594144	1	1	0.998249	0.0119653	3	0	12	1.43541	0	1.2	0	Random Only
'G14T4g'	0.992847	0.0594144	1	1	0.998249	0.0119653	3	0	12	1.43541	0	1.2	0	Random Only
'G14T5g'	0.992847	0.0594144	1	1	0.998249	0.0119653	3	0	12	1.43541	0	1.2	0	Random Only
'G14T6g'	1	1	1	1	0.998249	0.0119653	0	0	12	0	0	1.2	0	Random Only
'G14T7g'	1	1	1	1	0.998249	0.0119653	0	0	12	0	0	1.2	0	Random Only
'G14T8g'	1	1	1	1	0.998249	0.0119653	0	0	12	0	0	1.2	0	Random Only
'G14T9g'	1	1	1	1	0.998249	0.0119653	0	0	12	0	0	1.2	0	Random Only
'G14Tg'	1	1	1	1	0.998249	0.0119653	0	0	12	0	0	1.2	0	Random Only
'G16MT_L'	0.992823	0.0596155	1	1	0.998249	0.0119653	3	0	12	1.43541	0	1.2	0	Random Only
'G16MT_U'	0.992823	0.0596155	1	1	0.998249	0.0119653	3	0	12	1.43541	0	1.2	0	Random Only
'G1M6MASNB1terg'	1	1	1	1	0.998249	0.0119653	0	0	12	0	0	1.2	0	Random Only
'G1M7MASNBterg'	1	1	1	1	0.998249	0.0119653	0	0	12	0	0	1.2	0	Random Only
'G1M7MASNCterg'	1	1	1	1	0.998249	0.0119653	0	0	12	0	0	1.2	0	Random Only
'G1M8MASNterg'	1	1	1	1	0.998249	0.0119653	0	0	12	0	0	1.2	0	Random Only
'G2M8MASNterg'	1	1	1	1	0.998249	0.0119653	0	0	12	0	0	1.2	0	Random Only
'G3M8MASNterg'	1	1	1	1	0.998249	0.0119653	0	0	12	0	0	1.2	0	Random Only
'G3PD1'	0.993011	0.0580947	1	1	0.998249	0.0119653	3	0	12	1.43541	0	1.2	0	Random Only
'G3PD2m'	0.991404	0.0611793	1	1	0.998249	0.0119653	5	0	12	2.39234	0	1.2	0	Random Only
'G5SADrm'	0.977678	0.0705857	1	1	0.997247	0.0129247	36	0	14	17.2249	0	1.4	0	Random Only
'G5SADs'	1	1	1	1	0.998249	0.0119653	0	0	12	0	0	1.2	0	Random Only
'G5SDym'	0.992823	0.0596155	1	1	0.998249	0.0119653	3	0	12	1.43541	0	1.2	0	Random Only
'G6PDA'	0.992823	0.0596155	1	1	0.998249	0.0119653	3	0	12	1.43541	0	1.2	0	Random Only
'G6PDH1er'	1	1	1	1	0.998249	0.0119653	0	0	12	0	0	1.2	0	Random Only
'G6PDH1rer'	1	1	1	1	0.998249	0.0119653	0	0	12	0	0	1.2	0	Random Only
'G6PDH2r'	0.993379	0.0550075	1	1	0.998249	0.0119653	3	0	12	1.43541	0	1.2	0	Random Only
'G6PDH2rer'	1	1	1	1	0.998249	0.0119653	0	0	12	0	0	1.2	0	Random Only
'G6PPer'	0.992823	0.0596155	1	1	0.998249	0.0119653	3	0	12	1.43541	0	1.2	0	Random Only
'G6Pter'	0.992823	0.0596155	1	1	0.998249	0.0119653	3	0	12	1.43541	0	1.2	0	Random Only
'GABAVESSEC'	0.992823	0.0596155	1	1	0.998249	0.0119653	3	0	12	1.43541	0	1.2	0	Random Only
'GACMTRc'	0.989743	0.0624154	1	1	0.997709	0.0129864	6	0	15	2.87081	0	1.5	0	Random Only
'GACPAILter'	1	1	1	1	0.998249	0.0119653	0	0	12	0	0	1.2	0	Random Only
'GALACGLCGALGBSIDEte'	1	1	1	1	0.998249	0.0119653	0	0	12	0	0	1.2	0	Random Only
'GALASE10ly'	1	1	1	1	0.998249	0.0119653	0	0	12	0	0	1.2	0	Random Only
'GALASE11ly'	1	1	1	1	0.998249	0.0119653	0	0	12	0	0	1.2	0	Random Only
'GALASE12ly'	1	1	1	1	0.998249	0.0119653	0	0	12	0	0	1.2	0	Random Only
'GALASE13ly'	1	1	1	1	0.998249	0.0119653	0	0	12	0	0	1.2	0	Random Only
'GALASE14ly'	1	1	1	1	0.998249	0.0119653	0	0	12	0	0	1.2	0	Random Only
'GALASE15ly'	1	1	1	1	0.998249	0.0119653	0	0	12	0	0	1.2	0	Random Only
'GALASE16ly'	0.992847	0.0594144	1	1	0.998249	0.0119653	3	0	12	1.43541	0	1.2	0	Random Only
'GALASE17ly'	0.992847	0.0594144	1	1	0.998249	0.0119653	3	0	12	1.43541	0	1.2	0	Random Only
'GALASE18ly'	0.992847	0.0594144	1	1	0.998249	0.0119653	3	0	12	1.43541	0	1.2	0	Random Only
'GALASE19ly'	0.992847	0.0594144	1	1	0.998249	0.0119653	3	0	12	1.43541	0	1.2	0	Random Only
'GALASE1ly'	1	1	1	1	0.998249	0.0119653	0	0	12	0	0	1.2	0	Random Only
'GALASE20ly'	1	1	1	1	0.998249	0.0119653	0	0	12	0	0	1.2	0	Random Only
'GALASE3ly'	1	1	1	1	0.998249	0.0119653	0	0	12	0	0	1.2	0	Random Only
'GALASE4ly'	1	1	1	1	0.998249	0.0119653	0	0	12	0	0	1.2	0	Random Only
'GALASE5ly'	1	1	1	1	0.998249	0.0119653	0	0	12	0	0	1.2	0	Random Only
'GALASE6ly'	1	1	1	1	0.998249	0.0119653	0	0	12	0	0	1.2	0	Random Only
'GALASE7ly'	1	1	1	1	0.998249	0.0119653	0	0	12	0	0	1.2	0	Random Only
'GALASE8ly'	1	1	1	1	0.998249	0.0119653	0	0	12	0	0	1.2	0	Random Only
'GALASE9ly'	1	1	1	1	0.998249	0.0119653	0	0	12	0	0	1.2	0	Random Only
'GALC'	1	1	1	1	0.998249	0.0119653	0	0	12	0	0	1.2	0	Random Only
'GALFUC12GAL14ACGLCGALGLUSIDEte'	1	1	1	1	0.998249	0.0119653	0	0	12	0	0	1.2	0	Random Only
'GALFUC12GAL14ACGLCGALGLUSIDEtg'	1	1	1	1	0.998249	0.0119653	0	0	12	0	0	1.2	0	Random Only
'GALFUCGALACGLCGAL14ACGLCGALGLUSIDEte'	1	1	1	1	0.998249	0.0119653	0	0	12	0	0	1.2	0	Random Only
'GALFUCGALACGLCGAL14ACGLCGALGLUSIDEtg'	1	1	1	1	0.998249	0.0119653	0	0	12	0	0	1.2	0	Random Only
'GALGALFUCFUCGALACGLCGALACGLCGAL14ACGLCGALGLUSIDEte'	1	1	1	1	0.998249	0.0119653	0	0	12	0	0	1.2	0	Random Only
'GALGALFUCFUCGALACGLCGALACGLCGAL14ACGLCGALGLUSIDEtg'	1	1	1	1	0.998249	0.0119653	0	0	12	0	0	1.2	0	Random Only
'GALGALGALTHCRMte'	1	1	1	1	0.998249	0.0119653	0	0	12	0	0	1.2	0	Random Only
'GALGLUSIDEtg'	1	1	1	1	0.998249	0.0119653	0	0	12	0	0	1.2	0	Random Only
'GALGLUSIDEtl'	1	1	1	1	0.998249	0.0119653	0	0	12	0	0	1.2	0	Random Only
'GALK'	0.992823	0.0596155	1	1	0.998249	0.0119653	3	0	12	1.43541	0	1.2	0	Random Only
'GALNACT1g'	1	1	1	1	0.998249	0.0119653	0	0	12	0	0	1.2	0	Random Only
'GALNACT2g'	1	1	1	1	0.998249	0.0119653	0	0	12	0	0	1.2	0	Random Only
'GALNACT3g'	1	1	1	1	0.998249	0.0119653	0	0	12	0	0	1.2	0	Random Only
'GALNACT4g'	1	1	1	1	0.998249	0.0119653	0	0	12	0	0	1.2	0	Random Only
'GALNACT5g'	1	1	1	1	0.998249	0.0119653	0	0	12	0	0	1.2	0	Random Only
'GALNTg'	0.992847	0.0594144	1	1	0.998249	0.0119653	3	0	12	1.43541	0	1.2	0	Random Only
'GALOR'	1	1	1	1	0.998249	0.0119653	0	0	12	0	0	1.2	0	Random Only
'GALSIDEtl'	1	1	1	1	0.998249	0.0119653	0	0	12	0	0	1.2	0	Random Only
'GALT'	1	1	1	1	0.998249	0.0119653	0	0	12	0	0	1.2	0	Random Only
'GALT2g'	1	1	1	1	0.998249	0.0119653	0	0	12	0	0	1.2	0	Random Only
'GALTg'	1	1	1	1	0.998249	0.0119653	0	0	12	0	0	1.2	0	Random Only
'GALU'	1	1	1	1	0.998249	0.0119653	0	0	12	0	0	1.2	0	Random Only
'GALt1r'	1	1	1	1	0.998249	0.0119653	0	0	12	0	0	1.2	0	Random Only
'GALt2_2'	1	1	1	1	0.998249	0.0119653	0	0	12	0	0	1.2	0	Random Only
'GALt4'	1	1	1	1	0.998249	0.0119653	0	0	12	0	0	1.2	0	Random Only
'GALt4_2'	1	1	1	1	0.998249	0.0119653	0	0	12	0	0	1.2	0	Random Only
'GALtly'	0.992847	0.0594144	1	1	0.998249	0.0119653	3	0	12	1.43541	0	1.2	0	Random Only
'GAMYe'	1	1	1	1	0.998249	0.0119653	0	0	12	0	0	1.2	0	Random Only
'GAMt1r'	1	1	1	1	0.998249	0.0119653	0	0	12	0	0	1.2	0	Random Only
'GAO1'	1	1	1	1	0.998249	0.0119653	0	0	12	0	0	1.2	0	Random Only
'GAO1g'	1	1	1	1	0.998249	0.0119653	0	0	12	0	0	1.2	0	Random Only
'GAO2'	1	1	1	1	0.998249	0.0119653	0	0	12	0	0	1.2	0	Random Only
'GAO2g'	1	1	1	1	0.998249	0.0119653	0	0	12	0	0	1.2	0	Random Only
'GAPD'	0.991509	0.0609288	1	1	0.998249	0.0119653	4	0	12	1.91388	0	1.2	0	Random Only
'GARFT'	0.842772	0.0578369	0.859261	0.00128942	0.922873	0.0836344	209	6000	507	100	100	50.7	1	Both
'GASNASE2ly'	0.992823	0.0596155	1	1	0.998249	0.0119653	3	0	12	1.43541	0	1.2	0	Random Only
'GASNASE3ly'	1	1	1	1	0.998249	0.0119653	0	0	12	0	0	1.2	0	Random Only
'GASNASEly'	1	1	1	1	0.998249	0.0119653	0	0	12	0	0	1.2	0	Random Only
'GBA'	0.992823	0.0596155	1	1	0.998249	0.0119653	3	0	12	1.43541	0	1.2	0	Random Only
'GBAl'	1	1	1	1	0.998249	0.0119653	0	0	12	0	0	1.2	0	Random Only
'GBGT1'	1	1	1	1	0.998249	0.0119653	0	0	12	0	0	1.2	0	Random Only
'GBSIDEte'	1	1	1	1	0.998249	0.0119653	0	0	12	0	0	1.2	0	Random Only
'GBSIDEtl'	1	1	1	1	0.998249	0.0119653	0	0	12	0	0	1.2	0	Random Only
'GCALDD'	1	1	1	1	0.998249	0.0119653	0	0	12	0	0	1.2	0	Random Only
'GCALDDm'	1	1	1	1	0.998249	0.0119653	0	0	12	0	0	1.2	0	Random Only
'GCC2am'	0.992836	0.0595095	1	1	0.998249	0.0119653	3	0	12	1.43541	0	1.2	0	Random Only
'GCC2bim'	0.992836	0.0595095	1	1	0.998249	0.0119653	3	0	12	1.43541	0	1.2	0	Random Only
'GCC2cm'	0.992836	0.0595095	1	1	0.998249	0.0119653	3	0	12	1.43541	0	1.2	0	Random Only
'GCCam'	0.992836	0.0595095	1	1	0.998249	0.0119653	3	0	12	1.43541	0	1.2	0	Random Only
'GCCbim'	0.992836	0.0595095	1	1	0.998249	0.0119653	3	0	12	1.43541	0	1.2	0	Random Only
'GCCcm'	0.992836	0.0595095	1	1	0.998249	0.0119653	3	0	12	1.43541	0	1.2	0	Random Only
'GCHOLAt'	1	1	1	1	0.998249	0.0119653	0	0	12	0	0	1.2	0	Random Only
'GCHOLAt2'	1	1	1	1	0.998249	0.0119653	0	0	12	0	0	1.2	0	Random Only
'GCHOLAt3'	0.992823	0.0596155	1	1	0.998249	0.0119653	3	0	12	1.43541	0	1.2	0	Random Only
'GCHOLAte'	1	1	1	1	0.998249	0.0119653	0	0	12	0	0	1.2	0	Random Only
'GCHOLAtx'	1	1	1	1	0.998249	0.0119653	0	0	12	0	0	1.2	0	Random Only
'GCNTg'	1	1	1	1	0.998249	0.0119653	0	0	12	0	0	1.2	0	Random Only
'GD1B2te'	1	1	1	1	0.998249	0.0119653	0	0	12	0	0	1.2	0	Random Only
'GD1B2tg'	1	1	1	1	0.998249	0.0119653	0	0	12	0	0	1.2	0	Random Only
'GD1Cte'	1	1	1	1	0.998249	0.0119653	0	0	12	0	0	1.2	0	Random Only
'GD1Ctg'	1	1	1	1	0.998249	0.0119653	0	0	12	0	0	1.2	0	Random Only
'GDCHOLAte'	1	1	1	1	0.998249	0.0119653	0	0	12	0	0	1.2	0	Random Only
'GDPFUCtg'	1	1	1	1	0.998249	0.0119653	0	0	12	0	0	1.2	0	Random Only
'GDPtg'	1	1	1	1	0.998249	0.0119653	0	0	12	0	0	1.2	0	Random Only
'GF6PTA'	0.992823	0.0596155	1	1	0.998249	0.0119653	3	0	12	1.43541	0	1.2	0	Random Only
'GFUCS'	1	1	1	1	0.998249	0.0119653	0	0	12	0	0	1.2	0	Random Only
'GGH-10FTHF5GLUe'	1	1	1	1	0.998249	0.0119653	0	0	12	0	0	1.2	0	Random Only
'GGH-10FTHF5GLUl'	0.992823	0.0596155	1	1	0.998249	0.0119653	3	0	12	1.43541	0	1.2	0	Random Only
'GGH-10FTHF6GLUe'	1	1	1	1	0.998249	0.0119653	0	0	12	0	0	1.2	0	Random Only
'GGH-10FTHF6GLUl'	0.992823	0.0596155	1	1	0.998249	0.0119653	3	0	12	1.43541	0	1.2	0	Random Only
'GGH-10FTHF7GLUe'	1	1	1	1	0.998249	0.0119653	0	0	12	0	0	1.2	0	Random Only
'GGH-10FTHF7GLUl'	0.992823	0.0596155	1	1	0.998249	0.0119653	3	0	12	1.43541	0	1.2	0	Random Only
'GGH-5DHFe'	1	1	1	1	0.998249	0.0119653	0	0	12	0	0	1.2	0	Random Only
'GGH-5DHFl'	0.992823	0.0596155	1	1	0.998249	0.0119653	3	0	12	1.43541	0	1.2	0	Random Only
'GGH-5THFe'	1	1	1	1	0.998249	0.0119653	0	0	12	0	0	1.2	0	Random Only
'GGH-5THFl'	0.992823	0.0596155	1	1	0.998249	0.0119653	3	0	12	1.43541	0	1.2	0	Random Only
'GGH-6DHFe'	1	1	1	1	0.998249	0.0119653	0	0	12	0	0	1.2	0	Random Only
'GGH-6DHFl'	0.992823	0.0596155	1	1	0.998249	0.0119653	3	0	12	1.43541	0	1.2	0	Random Only
'GGH-6THFe'	1	1	1	1	0.998249	0.0119653	0	0	12	0	0	1.2	0	Random Only
'GGH-6THFl'	0.992823	0.0596155	1	1	0.998249	0.0119653	3	0	12	1.43541	0	1.2	0	Random Only
'GGH-7DHFe'	1	1	1	1	0.998249	0.0119653	0	0	12	0	0	1.2	0	Random Only
'GGH-7DHFl'	0.992823	0.0596155	1	1	0.998249	0.0119653	3	0	12	1.43541	0	1.2	0	Random Only
'GGH-7THFe'	1	1	1	1	0.998249	0.0119653	0	0	12	0	0	1.2	0	Random Only
'GGH-7THFl'	0.992823	0.0596155	1	1	0.998249	0.0119653	3	0	12	1.43541	0	1.2	0	Random Only
'GGLUCT'	0.992823	0.0596155	1	1	0.998249	0.0119653	3	0	12	1.43541	0	1.2	0	Random Only
'GGNG'	0.992128	0.0598445	1	1	0.998249	0.0119653	4	0	12	1.91388	0	1.2	0	Random Only
'GGT5r'	1	1	1	1	0.998249	0.0119653	0	0	12	0	0	1.2	0	Random Only
'GGT6'	1	1	1	1	0.998249	0.0119653	0	0	12	0	0	1.2	0	Random Only
'GGT_L'	1	1	1	1	0.998249	0.0119653	0	0	12	0	0	1.2	0	Random Only
'GGT_U'	1	1	1	1	0.998249	0.0119653	0	0	12	0	0	1.2	0	Random Only
'GHMT2r'	0.977711	0.0711472	1	1	0.994323	0.0223432	31	0	40	14.8325	0	4	1	Random Only
'GHMT2rm'	1	1	1	1	0.998249	0.0119653	0	0	12	0	0	1.2	0	Random Only
'GHMT3'	1	1	1	1	0.998249	0.0119653	0	0	12	0	0	1.2	0	Random Only
'GHMT3m'	1	1	1	1	0.998249	0.0119653	0	0	12	0	0	1.2	0	Random Only
'GK1'	0.504985	0.0173609	0.5	1.94511e-11	0.499125	0.00598263	209	6000	1000	100	100	100	1	Both
'GK1m'	1	1	1	1	0.998249	0.0119653	0	0	12	0	0	1.2	0	Random Only
'GLACO'	1	1	1	1	0.998249	0.0119653	0	0	12	0	0	1.2	0	Random Only
'GLACOm'	1	1	1	1	0.998249	0.0119653	0	0	12	0	0	1.2	0	Random Only
'GLACter'	1	1	1	1	0.998249	0.0119653	0	0	12	0	0	1.2	0	Random Only
'GLAl'	1	1	1	1	0.998249	0.0119653	0	0	12	0	0	1.2	0	Random Only
'GLB1'	1	1	1	1	0.998249	0.0119653	0	0	12	0	0	1.2	0	Random Only
'GLBRAN'	0.992128	0.0598445	1	1	0.998249	0.0119653	4	0	12	1.91388	0	1.2	0	Random Only
'GLCAASE1ly'	1	1	1	1	0.998249	0.0119653	0	0	12	0	0	1.2	0	Random Only
'GLCAASE4ly'	1	1	1	1	0.998249	0.0119653	0	0	12	0	0	1.2	0	Random Only
'GLCAASE5ly'	1	1	1	1	0.998249	0.0119653	0	0	12	0	0	1.2	0	Random Only
'GLCAASE6ly'	1	1	1	1	0.998249	0.0119653	0	0	12	0	0	1.2	0	Random Only
'GLCAASE7ly'	1	1	1	1	0.998249	0.0119653	0	0	12	0	0	1.2	0	Random Only
'GLCAASE8ly'	0.992823	0.0596155	1	1	0.998249	0.0119653	3	0	12	1.43541	0	1.2	0	Random Only
'GLCAASE9ly'	0.992823	0.0596155	1	1	0.998249	0.0119653	3	0	12	1.43541	0	1.2	0	Random Only
'GLCAE2g'	1	1	1	1	0.998249	0.0119653	0	0	12	0	0	1.2	0	Random Only
'GLCAT2g'	1	1	1	1	0.998249	0.0119653	0	0	12	0	0	1.2	0	Random Only
'GLCAT3g'	1	1	1	1	0.998249	0.0119653	0	0	12	0	0	1.2	0	Random Only
'GLCAT4g'	1	1	1	1	0.998249	0.0119653	0	0	12	0	0	1.2	0	Random Only
'GLCAT5g'	1	1	1	1	0.998249	0.0119653	0	0	12	0	0	1.2	0	Random Only
'GLCAT6g'	1	1	1	1	0.998249	0.0119653	0	0	12	0	0	1.2	0	Random Only
'GLCAT7g'	1	1	1	1	0.998249	0.0119653	0	0	12	0	0	1.2	0	Random Only
'GLCAT8g'	1	1	1	1	0.998249	0.0119653	0	0	12	0	0	1.2	0	Random Only
'GLCAT9g'	1	1	1	1	0.998249	0.0119653	0	0	12	0	0	1.2	0	Random Only
'GLCATg'	1	1	1	1	0.998249	0.0119653	0	0	12	0	0	1.2	0	Random Only
'GLCMter'	1	1	1	1	0.998249	0.0119653	0	0	12	0	0	1.2	0	Random Only
'GLCNACASE1ly'	1	1	1	1	0.998249	0.0119653	0	0	12	0	0	1.2	0	Random Only
'GLCNACASE2ly'	1	1	1	1	0.998249	0.0119653	0	0	12	0	0	1.2	0	Random Only
'GLCNACASE3ly'	1	1	1	1	0.998249	0.0119653	0	0	12	0	0	1.2	0	Random Only
'GLCNACASE4ly'	1	1	1	1	0.998249	0.0119653	0	0	12	0	0	1.2	0	Random Only
'GLCNACASE5ly'	1	1	1	1	0.998249	0.0119653	0	0	12	0	0	1.2	0	Random Only
'GLCNACDASg'	1	1	1	1	0.998249	0.0119653	0	0	12	0	0	1.2	0	Random Only
'GLCNACPT_L'	0.992823	0.0596155	1	1	0.998249	0.0119653	3	0	12	1.43541	0	1.2	0	Random Only
'GLCNACPT_U'	0.992823	0.0596155	1	1	0.998249	0.0119653	3	0	12	1.43541	0	1.2	0	Random Only
'GLCNACT1g'	1	1	1	1	0.998249	0.0119653	0	0	12	0	0	1.2	0	Random Only
'GLCNACT2g'	1	1	1	1	0.998249	0.0119653	0	0	12	0	0	1.2	0	Random Only
'GLCNACT3g'	1	1	1	1	0.998249	0.0119653	0	0	12	0	0	1.2	0	Random Only
'GLCNACT4g'	1	1	1	1	0.998249	0.0119653	0	0	12	0	0	1.2	0	Random Only
'GLCNACT5g'	1	1	1	1	0.998249	0.0119653	0	0	12	0	0	1.2	0	Random Only
'GLCNACT_L'	0.992823	0.0596155	1	1	0.998249	0.0119653	3	0	12	1.43541	0	1.2	0	Random Only
'GLCNACT_U'	0.992823	0.0596155	1	1	0.998249	0.0119653	3	0	12	1.43541	0	1.2	0	Random Only
'GLCURter'	0.992823	0.0596155	1	1	0.998249	0.0119653	3	0	12	1.43541	0	1.2	0	Random Only
'GLCURtly'	0.992823	0.0596155	1	1	0.998249	0.0119653	3	0	12	1.43541	0	1.2	0	Random Only
'GLCt1r'	1	1	1	1	0.998249	0.0119653	0	0	12	0	0	1.2	0	Random Only
'GLCt2_2'	1	1	1	1	0.998249	0.0119653	0	0	12	0	0	1.2	0	Random Only
'GLCt2r'	1	1	1	1	0.998249	0.0119653	0	0	12	0	0	1.2	0	Random Only
'GLCt4'	1	1	1	1	0.998249	0.0119653	0	0	12	0	0	1.2	0	Random Only
'GLCt4_2'	1	1	1	1	0.998249	0.0119653	0	0	12	0	0	1.2	0	Random Only
'GLCter'	0.992823	0.0596155	1	1	0.998249	0.0119653	3	0	12	1.43541	0	1.2	0	Random Only
'GLCtg'	0.992823	0.0596155	1	1	0.998249	0.0119653	3	0	12	1.43541	0	1.2	0	Random Only
'GLCtly'	1	1	1	1	0.998249	0.0119653	0	0	12	0	0	1.2	0	Random Only
'GLDBRAN'	0.992823	0.0596155	1	1	0.998249	0.0119653	3	0	12	1.43541	0	1.2	0	Random Only
'GLGNS1'	0.992128	0.0598445	1	1	0.998249	0.0119653	4	0	12	1.91388	0	1.2	0	Random Only
'GLNALANaEx'	1	1	1	1	0.998249	0.0119653	0	0	12	0	0	1.2	0	Random Only
'GLNASNNaEx'	1	1	1	1	0.998249	0.0119653	0	0	12	0	0	1.2	0	Random Only
'GLNCYSNaEx'	1	1	1	1	0.998249	0.0119653	0	0	12	0	0	1.2	0	Random Only
'GLNLASEer'	1	1	1	1	0.998249	0.0119653	0	0	12	0	0	1.2	0	Random Only
'GLNS'	0.992823	0.0596155	1	1	0.998213	0.0120147	3	0	12	1.43541	0	1.2	0	Random Only
'GLNSERNaEx'	1	1	1	1	0.998249	0.0119653	0	0	12	0	0	1.2	0	Random Only
'GLNTHRNaEx'	1	1	1	1	0.998249	0.0119653	0	0	12	0	0	1.2	0	Random Only
'GLNt4'	1	1	1	1	0.998249	0.0119653	0	0	12	0	0	1.2	0	Random Only
'GLNtN1'	1	1	1	1	0.998249	0.0119653	0	0	12	0	0	1.2	0	Random Only
'GLNtm'	0.992989	0.0582395	1	1	0.998249	0.0119653	3	0	12	1.43541	0	1.2	0	Random Only
'GLPASE1'	0.992823	0.0596155	1	1	0.998249	0.0119653	3	0	12	1.43541	0	1.2	0	Random Only
'GLPASE2'	0.992823	0.0596155	1	1	0.998249	0.0119653	3	0	12	1.43541	0	1.2	0	Random Only
'GLRASE'	1	1	1	1	0.998249	0.0119653	0	0	12	0	0	1.2	0	Random Only
'GLU5Km'	0.992823	0.0596155	1	1	0.998249	0.0119653	3	0	12	1.43541	0	1.2	0	Random Only
'GLUCYS'	0.992823	0.0596155	1	1	0.998249	0.0119653	3	0	12	1.43541	0	1.2	0	Random Only
'GLUDxm'	0.992861	0.0592988	1	1	0.998249	0.0119653	3	0	12	1.43541	0	1.2	0	Random Only
'GLUDym'	0.992861	0.0592988	1	1	0.998249	0.0119653	3	0	12	1.43541	0	1.2	0	Random Only
'GLUNm'	0.992989	0.0582395	1	1	0.998249	0.0119653	3	0	12	1.43541	0	1.2	0	Random Only
'GLUPRT'	0.842772	0.0578369	0.859261	0.00128942	0.922872	0.0836342	209	6000	507	100	100	50.7	1	Both
'GLUTCOADHm'	1	1	1	1	0.998249	0.0119653	0	0	12	0	0	1.2	0	Random Only
'GLUVESSEC'	0.992823	0.0596155	1	1	0.998249	0.0119653	3	0	12	1.43541	0	1.2	0	Random Only
'GLUt2m'	0.993403	0.054801	1	1	0.998249	0.0119653	3	0	12	1.43541	0	1.2	0	Random Only
'GLUt6'	0.992823	0.0596155	1	1	0.998249	0.0119653	3	0	12	1.43541	0	1.2	0	Random Only
'GLUt7l'	0.992823	0.0596155	1	1	0.998249	0.0119653	3	0	12	1.43541	0	1.2	0	Random Only
'GLUtr'	1	1	1	1	0.998249	0.0119653	0	0	12	0	0	1.2	0	Random Only
'GLXO1'	1	1	1	1	0.998249	0.0119653	0	0	12	0	0	1.2	0	Random Only
'GLXtm'	1	1	1	1	0.998249	0.0119653	0	0	12	0	0	1.2	0	Random Only
'GLXtp'	1	1	1	1	0.998249	0.0119653	0	0	12	0	0	1.2	0	Random Only
'GLYAMDTRc'	0.989743	0.0624154	1	1	0.997709	0.0129864	6	0	15	2.87081	0	1.5	0	Random Only
'GLYATm'	1	1	1	1	0.998249	0.0119653	0	0	12	0	0	1.2	0	Random Only
'GLYBt4(2)r'	0.992824	0.0596074	1	1	0.998249	0.0119653	3	0	12	1.43541	0	1.2	0	Random Only
'GLYBtm'	0.992824	0.0596074	1	1	0.998249	0.0119653	3	0	12	1.43541	0	1.2	0	Random Only
'GLYC-St'	1	1	1	1	0.998249	0.0119653	0	0	12	0	0	1.2	0	Random Only
'GLYC3Ptm'	1	1	1	1	0.998249	0.0119653	0	0	12	0	0	1.2	0	Random Only
'GLYCK2'	1	1	1	1	0.998249	0.0119653	0	0	12	0	0	1.2	0	Random Only
'GLYCLTDy'	1	1	1	1	0.998249	0.0119653	0	0	12	0	0	1.2	0	Random Only
'GLYCLTtp'	1	1	1	1	0.998249	0.0119653	0	0	12	0	0	1.2	0	Random Only
'GLYCt'	0.994688	0.0441257	1	1	0.998249	0.0119653	3	0	12	1.43541	0	1.2	0	Random Only
'GLYCtm'	1	1	1	1	0.998249	0.0119653	0	0	12	0	0	1.2	0	Random Only
'GLYK'	1	1	1	1	0.998249	0.0119653	0	0	12	0	0	1.2	0	Random Only
'GLYKm'	1	1	1	1	0.998249	0.0119653	0	0	12	0	0	1.2	0	Random Only
'GLYOX'	0.993181	0.0566381	1	1	0.998249	0.0119653	3	0	12	1.43541	0	1.2	0	Random Only
'GLYOXm'	1	1	1	1	0.998249	0.0119653	0	0	12	0	0	1.2	0	Random Only
'GLYVESSEC'	0.992823	0.0596155	1	1	0.998249	0.0119653	3	0	12	1.43541	0	1.2	0	Random Only
'GLYt2r'	1	1	1	1	0.998249	0.0119653	0	0	12	0	0	1.2	0	Random Only
'GLYt2rL'	1	1	1	1	0.998249	0.0119653	0	0	12	0	0	1.2	0	Random Only
'GLYt4'	1	1	1	1	0.998249	0.0119653	0	0	12	0	0	1.2	0	Random Only
'GLYt7(211)r'	1	1	1	1	0.998249	0.0119653	0	0	12	0	0	1.2	0	Random Only
'GLYt7(311)r'	1	1	1	1	0.998249	0.0119653	0	0	12	0	0	1.2	0	Random Only
'GLYtm'	0.992836	0.0595095	1	1	0.998249	0.0119653	3	0	12	1.43541	0	1.2	0	Random Only
'GLYtp'	1	1	1	1	0.998249	0.0119653	0	0	12	0	0	1.2	0	Random Only
'GMAND'	1	1	1	1	0.998249	0.0119653	0	0	12	0	0	1.2	0	Random Only
'GMPR'	0.992823	0.0596155	1	1	0.998249	0.0119653	3	0	12	1.43541	0	1.2	0	Random Only
'GMPS2'	0.811876	0.0526237	0.826879	0.00117596	0.872807	0.0899129	209	6000	748	100	100	74.8	1	Both
'GMPtg'	1	1	1	1	0.998249	0.0119653	0	0	12	0	0	1.2	0	Random Only
'GMPtn'	0.992823	0.0596155	1	1	0.998249	0.0119653	3	0	12	1.43541	0	1.2	0	Random Only
'GND'	0.993379	0.0550075	1	1	0.998249	0.0119653	3	0	12	1.43541	0	1.2	0	Random Only
'GNDer'	1	1	1	1	0.998249	0.0119653	0	0	12	0	0	1.2	0	Random Only
'GNMT'	1	1	1	1	0.998249	0.0119653	0	0	12	0	0	1.2	0	Random Only
'GP1CALPHAte'	1	1	1	1	0.998249	0.0119653	0	0	12	0	0	1.2	0	Random Only
'GP1CALPHAtg'	1	1	1	1	0.998249	0.0119653	0	0	12	0	0	1.2	0	Random Only
'GP1Cte'	1	1	1	1	0.998249	0.0119653	0	0	12	0	0	1.2	0	Random Only
'GP1Ctg'	1	1	1	1	0.998249	0.0119653	0	0	12	0	0	1.2	0	Random Only
'GPAM_hs'	1	1	1	1	0.998249	0.0119653	0	0	12	0	0	1.2	0	Random Only
'GPAMm_hs'	1	1	1	1	0.998249	0.0119653	0	0	12	0	0	1.2	0	Random Only
'GPDDA1'	0.992823	0.0596155	1	1	0.998249	0.0119653	3	0	12	1.43541	0	1.2	0	Random Only
'GPIAT'	1	1	1	1	0.998249	0.0119653	0	0	12	0	0	1.2	0	Random Only
'GPIMTer_L'	1	1	1	1	0.998249	0.0119653	0	0	12	0	0	1.2	0	Random Only
'GPIMTer_U'	1	1	1	1	0.998249	0.0119653	0	0	12	0	0	1.2	0	Random Only
'GQ1BALPHAte'	1	1	1	1	0.998249	0.0119653	0	0	12	0	0	1.2	0	Random Only
'GQ1BALPHAtg'	1	1	1	1	0.998249	0.0119653	0	0	12	0	0	1.2	0	Random Only
'GQ1Bte'	1	1	1	1	0.998249	0.0119653	0	0	12	0	0	1.2	0	Random Only
'GQ1Btg'	1	1	1	1	0.998249	0.0119653	0	0	12	0	0	1.2	0	Random Only
'GRTT'	1	1	1	1	0.998249	0.0119653	0	0	12	0	0	1.2	0	Random Only
'GRTTx'	0.993138	0.0570007	1	1	0.998249	0.0119653	3	0	12	1.43541	0	1.2	0	Random Only
'GSNKm'	1	1	1	1	0.998249	0.0119653	0	0	12	0	0	1.2	0	Random Only
'GSNt'	1	1	1	1	0.998249	0.0119653	0	0	12	0	0	1.2	0	Random Only
'GSNt4'	1	1	1	1	0.998249	0.0119653	0	0	12	0	0	1.2	0	Random Only
'GSNt5'	1	1	1	1	0.998249	0.0119653	0	0	12	0	0	1.2	0	Random Only
'GSNtl'	1	1	1	1	0.998249	0.0119653	0	0	12	0	0	1.2	0	Random Only
'GSNtm'	1	1	1	1	0.998249	0.0119653	0	0	12	0	0	1.2	0	Random Only
'GT1Ate'	1	1	1	1	0.998249	0.0119653	0	0	12	0	0	1.2	0	Random Only
'GT1Atg'	1	1	1	1	0.998249	0.0119653	0	0	12	0	0	1.2	0	Random Only
'GTHDH'	0.992823	0.0596155	1	1	0.998249	0.0119653	3	0	12	1.43541	0	1.2	0	Random Only
'GTHO'	0.992823	0.0596155	1	1	0.998249	0.0119653	3	0	12	1.43541	0	1.2	0	Random Only
'GTHOm'	0.992823	0.0596155	1	1	0.998249	0.0119653	3	0	12	1.43541	0	1.2	0	Random Only
'GTHP'	0.992823	0.0596155	1	1	0.998249	0.0119653	3	0	12	1.43541	0	1.2	0	Random Only
'GTHPe'	1	1	1	1	0.998249	0.0119653	0	0	12	0	0	1.2	0	Random Only
'GTHPm'	0.992823	0.0596155	1	1	0.998249	0.0119653	3	0	12	1.43541	0	1.2	0	Random Only
'GTHRDt'	1	1	1	1	0.998249	0.0119653	0	0	12	0	0	1.2	0	Random Only
'GTHRDtr'	1	1	1	1	0.998249	0.0119653	0	0	12	0	0	1.2	0	Random Only
'GTHS'	0.992823	0.0596155	1	1	0.998249	0.0119653	3	0	12	1.43541	0	1.2	0	Random Only
'GTMLTe'	0.992823	0.0596155	1	1	0.998249	0.0119653	3	0	12	1.43541	0	1.2	0	Random Only
'GTPCI'	1	1	1	1	0.998249	0.0119653	0	0	12	0	0	1.2	0	Random Only
'GTPCIn'	1	1	1	1	0.998249	0.0119653	0	0	12	0	0	1.2	0	Random Only
'GTPtn'	1	1	1	1	0.998249	0.0119653	0	0	12	0	0	1.2	0	Random Only
'GUACYC'	0.992823	0.0596155	1	1	0.998249	0.0119653	3	0	12	1.43541	0	1.2	0	Random Only
'GUAD'	1	1	1	1	0.998249	0.0119653	0	0	12	0	0	1.2	0	Random Only
'GUAPRT'	0.992823	0.0596155	1	1	0.998249	0.0119653	3	0	12	1.43541	0	1.2	0	Random Only
'GUAt'	0.988598	0.0628024	1	1	0.997324	0.0139157	6	0	20	2.87081	0	2	0	Random Only
'GULLACter'	1	1	1	1	0.998249	0.0119653	0	0	12	0	0	1.2	0	Random Only
'GULN3D'	0.992823	0.0596155	1	1	0.998249	0.0119653	3	0	12	1.43541	0	1.2	0	Random Only
'GULNDer'	0.992823	0.0596155	1	1	0.998249	0.0119653	3	0	12	1.43541	0	1.2	0	Random Only
'GULNter'	0.992823	0.0596155	1	1	0.998249	0.0119653	3	0	12	1.43541	0	1.2	0	Random Only
'GUR1PP'	0.993125	0.0571066	1	1	0.998249	0.0119653	3	0	12	1.43541	0	1.2	0	Random Only
'GluForTx'	0.970983	0.076073	1	1	0.937575	0.0481148	41	0	555	19.6172	0	55.5	0	Random Only
'H2CO3D'	0.833387	0.0563994	0.848169	0.00124961	0.915032	0.0857812	209	6000	549	100	100	54.9	1	Both
'H2CO3D2'	0.833387	0.0563994	0.848169	0.00124961	0.915032	0.0857812	209	6000	549	100	100	54.9	1	Both
'H2CO3D2m'	1	1	1	1	0.998249	0.0119653	0	0	12	0	0	1.2	0	Random Only
'H2ETer'	1	1	1	1	0.998249	0.0119653	0	0	12	0	0	1.2	0	Random Only
'H2MTer_L'	1	1	1	1	0.998249	0.0119653	0	0	12	0	0	1.2	0	Random Only
'H2MTer_U'	1	1	1	1	0.998249	0.0119653	0	0	12	0	0	1.2	0	Random Only
'H2O2t'	0.992823	0.0596155	1	1	0.998249	0.0119653	3	0	12	1.43541	0	1.2	0	Random Only
'H2O2tly'	0.992823	0.0596155	1	1	0.998249	0.0119653	3	0	12	1.43541	0	1.2	0	Random Only
'H2O2tm'	0.992823	0.0596155	1	1	0.998249	0.0119653	3	0	12	1.43541	0	1.2	0	Random Only
'H2O2tn'	0.994433	0.0462401	1	1	0.998249	0.0119653	3	0	12	1.43541	0	1.2	0	Random Only
'H2O2tp'	0.992823	0.0596155	1	1	0.998249	0.0119653	3	0	12	1.43541	0	1.2	0	Random Only
'H2Ot'	1	1	1	1	0.998249	0.0119653	0	0	12	0	0	1.2	0	Random Only
'H2Oter'	0.988044	0.0636265	1	1	0.998249	0.0119653	14	0	12	6.69856	0	1.2	0	Random Only
'H2Otg'	0.992823	0.0596155	1	1	0.998249	0.0119653	3	0	12	1.43541	0	1.2	0	Random Only
'H2Otly'	0.992823	0.0596155	1	1	0.998249	0.0119653	3	0	12	1.43541	0	1.2	0	Random Only
'H2Otm'	1	1	1	1	0.998249	0.0119653	0	0	12	0	0	1.2	0	Random Only
'H2Otn'	0.992823	0.0596155	1	1	0.998249	0.0119653	3	0	12	1.43541	0	1.2	0	Random Only
'H2Otp'	0.992823	0.0596155	1	1	0.998249	0.0119653	3	0	12	1.43541	0	1.2	0	Random Only
'H3ETer'	1	1	1	1	0.998249	0.0119653	0	0	12	0	0	1.2	0	Random Only
'H3MTer_L'	1	1	1	1	0.998249	0.0119653	0	0	12	0	0	1.2	0	Random Only
'H3MTer_U'	1	1	1	1	0.998249	0.0119653	0	0	12	0	0	1.2	0	Random Only
'H4ETer'	1	1	1	1	0.998249	0.0119653	0	0	12	0	0	1.2	0	Random Only
'H5MTer_L'	1	1	1	1	0.998249	0.0119653	0	0	12	0	0	1.2	0	Random Only
'H5MTer_U'	1	1	1	1	0.998249	0.0119653	0	0	12	0	0	1.2	0	Random Only
'H6''ET2er'	1	1	1	1	0.998249	0.0119653	0	0	12	0	0	1.2	0	Random Only
'H6''ETer'	1	1	1	1	0.998249	0.0119653	0	0	12	0	0	1.2	0	Random Only
'H6MTer_L'	1	1	1	1	0.998249	0.0119653	0	0	12	0	0	1.2	0	Random Only
'H6MTer_U'	1	1	1	1	0.998249	0.0119653	0	0	12	0	0	1.2	0	Random Only
'H7''ETer'	1	1	1	1	0.998249	0.0119653	0	0	12	0	0	1.2	0	Random Only
'H7''TAer'	1	1	1	1	0.998249	0.0119653	0	0	12	0	0	1.2	0	Random Only
'H7ET2er'	1	1	1	1	0.998249	0.0119653	0	0	12	0	0	1.2	0	Random Only
'H7MTer_L'	1	1	1	1	0.998249	0.0119653	0	0	12	0	0	1.2	0	Random Only
[truncated: 1,395 more rows]

## Sheet: DENV
Model Reaction ID	Average Media Analysis Normalised Virus Optima	S.D. Media Analysis Normalised Virus Optima	Average Point Mutation Analysis Normalised Virus Optima	S.D. Point Mutation Analysis Normalised Virus Optima	Average Random Mutation Analysis Normalised Virus Optima	S.D. Random Mutation Analysis Normalised Virus Optima	Reaction Frequency Media Analysis	Reaction Frequency Point Mutation Analysis	Reaction Frequency Random Mutation Analysis	Reaction Frequency Media Analysis (% Total Cases)	Reaction Frequency Point Mutation Analysis (% Total Cases)	Reaction Frequency Random Mutation Analysis (% Total Cases)	Identified by Unaltered Host-Derived Enforcement Analysis	Mutation Conditions Present In
'10FTHF5GLUtl'	0.992823	0.0596155	1	1	0.99976	0.00315174	3	0	1	1.43541	0	0.1	0	Random Only
'10FTHF5GLUtm'	0.992823	0.0596155	1	1	0.99976	0.00315174	3	0	1	1.43541	0	0.1	0	Random Only
'10FTHF6GLUtl'	0.992823	0.0596155	1	1	0.99976	0.00315174	3	0	1	1.43541	0	0.1	0	Random Only
'10FTHF6GLUtm'	0.992823	0.0596155	1	1	0.99976	0.00315174	3	0	1	1.43541	0	0.1	0	Random Only
'10FTHF7GLUtl'	0.992823	0.0596155	1	1	0.99976	0.00315174	3	0	1	1.43541	0	0.1	0	Random Only
'10FTHF7GLUtm'	0.992823	0.0596155	1	1	0.99976	0.00315174	3	0	1	1.43541	0	0.1	0	Random Only
'10FTHFtl'	0.992823	0.0596155	1	1	0.99976	0.00315174	3	0	1	1.43541	0	0.1	0	Random Only
'10FTHFtm'	0.992823	0.0596155	1	1	0.99976	0.00315174	3	0	1	1.43541	0	0.1	0	Random Only
'13DAMPPOX'	1	1	1	1	0.99976	0.00315174	0	0	1	0	0	0.1	0	Random Only
'1MNCAMti'	1	1	1	1	0.99976	0.00315174	0	0	1	0	0	0.1	0	Random Only
'1a,24,25VITD2Hm'	1	1	1	1	0.99976	0.00315174	0	0	1	0	0	0.1	0	Random Only
'1a,24,25VITD3Hm'	1	1	1	1	0.99976	0.00315174	0	0	1	0	0	0.1	0	Random Only
'1a,25VITD2Hm'	1	1	1	1	0.99976	0.00315174	0	0	1	0	0	0.1	0	Random Only
'1a,25VITD3Hm'	1	1	1	1	0.99976	0.00315174	0	0	1	0	0	0.1	0	Random Only
'24,25DHVITD2t'	1	1	1	1	0.99976	0.00315174	0	0	1	0	0	0.1	0	Random Only
'24,25DHVITD2tm'	1	1	1	1	0.99976	0.00315174	0	0	1	0	0	0.1	0	Random Only
'24,25DHVITD3t'	0.993167	0.0567611	1	1	0.99976	0.00315174	3	0	1	1.43541	0	0.1	0	Random Only
'24,25DHVITD3tm'	0.993167	0.0567611	1	1	0.99976	0.00315174	3	0	1	1.43541	0	0.1	0	Random Only
'24,25VITD2Hm'	1	1	1	1	0.99976	0.00315174	0	0	1	0	0	0.1	0	Random Only
'24,25VITD3Hm'	0.993167	0.0567611	1	1	0.99976	0.00315174	3	0	1	1.43541	0	0.1	0	Random Only
'24NPHte'	1	1	1	1	0.99976	0.00315174	0	0	1	0	0	0.1	0	Random Only
'25HVITD2t'	1	1	1	1	0.99976	0.00315174	0	0	1	0	0	0.1	0	Random Only
'25HVITD2tin'	1	1	1	1	0.99976	0.00315174	0	0	1	0	0	0.1	0	Random Only
'25HVITD2tin-m'	1	1	1	1	0.99976	0.00315174	0	0	1	0	0	0.1	0	Random Only
'25HVITD2tm'	1	1	1	1	0.99976	0.00315174	0	0	1	0	0	0.1	0	Random Only
'25HVITD3t'	1	1	1	1	0.99976	0.00315174	0	0	1	0	0	0.1	0	Random Only
'25HVITD3tin'	1	1	1	1	0.99976	0.00315174	0	0	1	0	0	0.1	0	Random Only
'25HVITD3tin-m'	1	1	1	1	0.99976	0.00315174	0	0	1	0	0	0.1	0	Random Only
'25HVITD3tm'	1	1	1	1	0.99976	0.00315174	0	0	1	0	0	0.1	0	Random Only
'25VITD2Hm'	1	1	1	1	0.99976	0.00315174	0	0	1	0	0	0.1	0	Random Only
'25VITD3Hm'	1	1	1	1	0.99976	0.00315174	0	0	1	0	0	0.1	0	Random Only
'2DR1PP'	0.992994	0.0581923	1	1	0.99976	0.00315174	3	0	1	1.43541	0	0.1	0	Random Only
'2HBO'	0.863267	0.0670003	0.875092	0.00105975	0.934503	0.0553802	196	6000	554	93.7799	100	55.4	1	Both
'2HBt2'	0.863267	0.0670003	0.875092	0.00105975	0.934503	0.0553802	196	6000	554	93.7799	100	55.4	1	Both
'2HCO3_NAt'	1	1	1	1	0.99976	0.00315174	0	0	1	0	0	0.1	0	Random Only
'2MCITt'	0.86725	0.0726129	0.875092	0.00105975	0.934503	0.0553802	187	6000	554	89.4737	100	55.4	1	Both
'2OXOADOXm'	1	1	1	1	0.99976	0.00315174	0	0	1	0	0	0.1	0	Random Only
'2OXOADPTm'	1	1	1	1	0.99976	0.00315174	0	0	1	0	0	0.1	0	Random Only
'34DHPHAMT'	1	1	1	1	0.99976	0.00315174	0	0	1	0	0	0.1	0	Random Only
'34DHPLACOX'	1	1	1	1	0.99976	0.00315174	0	0	1	0	0	0.1	0	Random Only
'34DHPLACOX(NADP)'	1	1	1	1	0.99976	0.00315174	0	0	1	0	0	0.1	0	Random Only
'34HPLFM'	1	1	1	1	0.99976	0.00315174	0	0	1	0	0	0.1	0	Random Only
'35CGMPtn'	0.992823	0.0596155	1	1	0.99976	0.00315174	3	0	1	1.43541	0	0.1	0	Random Only
'3AIBTm'	0.986852	0.0639271	1	1	0.999687	0.00344935	13	0	1	6.2201	0	0.1	0	Random Only
'3AIBt'	0.986852	0.0639271	1	1	0.999687	0.00344935	13	0	1	6.2201	0	0.1	0	Random Only
'3AIBtm'	0.986852	0.0639271	1	1	0.999687	0.00344935	13	0	1	6.2201	0	0.1	0	Random Only
'3DPHBH1'	1	1	1	1	0.99976	0.00315174	0	0	1	0	0	0.1	0	Random Only
'3DPHBH2'	1	1	1	1	0.99976	0.00315174	0	0	1	0	0	0.1	0	Random Only
'3DSPHR'	0.97936	0.0685562	1	1	0.998082	0.0132595	30	0	13	14.3541	0	1.3	0	Random Only
'3HAO'	1	1	1	1	0.99976	0.00315174	0	0	1	0	0	0.1	0	Random Only
'3HBCDm'	1	1	1	1	0.99976	0.00315174	0	0	1	0	0	0.1	0	Random Only
'3HBCOAHLm'	0.98526	0.0651787	1	1	0.999662	0.00347166	15	0	1	7.17703	0	0.1	0	Random Only
'3HCO3_NAt'	1	1	1	1	0.99976	0.00315174	0	0	1	0	0	0.1	0	Random Only
'3HLYTCL'	1	1	1	1	0.99976	0.00315174	0	0	1	0	0	0.1	0	Random Only
'3HPCOAHYD'	1	1	1	1	0.99976	0.00315174	0	0	1	0	0	0.1	0	Random Only
'3HXKYNDCL'	1	1	1	1	0.99976	0.00315174	0	0	1	0	0	0.1	0	Random Only
'3HXKYNOXDA'	1	1	1	1	0.99976	0.00315174	0	0	1	0	0	0.1	0	Random Only
'3M4HDXPAC'	1	1	1	1	0.99976	0.00315174	0	0	1	0	0	0.1	0	Random Only
'3MLDAt'	0.991049	0.0601875	1	1	0.966344	0.0490255	8	0	280	3.82775	0	28	0	Random Only
'3MOBt2im'	1	1	1	1	0.99976	0.00315174	0	0	1	0	0	0.1	0	Random Only
'3MOPt2im'	1	1	1	1	0.99976	0.00315174	0	0	1	0	0	0.1	0	Random Only
'3MOX4HOXPGALDOX'	1	1	1	1	0.99976	0.00315174	0	0	1	0	0	0.1	0	Random Only
'3MOX4HOXPGALDOX(NADP)'	1	1	1	1	0.99976	0.00315174	0	0	1	0	0	0.1	0	Random Only
'3MOXTYROX'	1	1	1	1	0.99976	0.00315174	0	0	1	0	0	0.1	0	Random Only
'3NTD7l'	1	1	1	1	0.99976	0.00315174	0	0	1	0	0	0.1	0	Random Only
'3SALAASPm'	1	1	1	1	0.99976	0.00315174	0	0	1	0	0	0.1	0	Random Only
'3SALATAi'	1	1	1	1	0.99976	0.00315174	0	0	1	0	0	0.1	0	Random Only
'3SALATAim'	1	1	1	1	0.99976	0.00315174	0	0	1	0	0	0.1	0	Random Only
'41R1H2MAE12BOOX'	1	1	1	1	0.99976	0.00315174	0	0	1	0	0	0.1	0	Random Only
'41R2A1H12BOOX'	1	1	1	1	0.99976	0.00315174	0	0	1	0	0	0.1	0	Random Only
'42A12BOOX'	1	1	1	1	0.99976	0.00315174	0	0	1	0	0	0.1	0	Random Only
'4ABUTtm'	0.99417	0.0484336	1	1	0.99976	0.00315174	3	0	1	1.43541	0	0.1	0	Random Only
'4HBZCOAFm'	1	1	1	1	0.99976	0.00315174	0	0	1	0	0	0.1	0	Random Only
'4HBZFm'	1	1	1	1	0.99976	0.00315174	0	0	1	0	0	0.1	0	Random Only
'4HDEBRISOQUINEte'	1	1	1	1	0.99976	0.00315174	0	0	1	0	0	0.1	0	Random Only
'4HGLSDm'	1	1	1	1	0.99976	0.00315174	0	0	1	0	0	0.1	0	Random Only
'4HOXPACDOX(NADP)'	0.99273	0.0596118	1	1	0.999739	0.00316964	3	0	1	1.43541	0	0.1	0	Random Only
'4MOPt2im'	1	1	1	1	0.99976	0.00315174	0	0	1	0	0	0.1	0	Random Only
'4MPTNLte'	1	1	1	1	0.99976	0.00315174	0	0	1	0	0	0.1	0	Random Only
'4MPTNLtm'	1	1	1	1	0.99976	0.00315174	0	0	1	0	0	0.1	0	Random Only
'4MPTNLtr'	1	1	1	1	0.99976	0.00315174	0	0	1	0	0	0.1	0	Random Only
'4NPHSFte'	1	1	1	1	0.99976	0.00315174	0	0	1	0	0	0.1	0	Random Only
'4NPHSULT'	1	1	1	1	0.99976	0.00315174	0	0	1	0	0	0.1	0	Random Only
'4NPHte'	1	1	1	1	0.99976	0.00315174	0	0	1	0	0	0.1	0	Random Only
'4PYRDX'	1	1	1	1	0.99976	0.00315174	0	0	1	0	0	0.1	0	Random Only
'5ADTSTSTERONEGLCte'	1	1	1	1	0.99976	0.00315174	0	0	1	0	0	0.1	0	Random Only
'5ADTSTSTERONEGLCtr'	1	1	1	1	0.99976	0.00315174	0	0	1	0	0	0.1	0	Random Only
'5ADTSTSTERONEte'	1	1	1	1	0.99976	0.00315174	0	0	1	0	0	0.1	0	Random Only
'5ADTSTSTERONEtr'	1	1	1	1	0.99976	0.00315174	0	0	1	0	0	0.1	0	Random Only
'5DHFtl'	0.992823	0.0596155	1	1	0.99976	0.00315174	3	0	1	1.43541	0	0.1	0	Random Only
'5FTHFt2'	1	1	1	1	0.99976	0.00315174	0	0	1	0	0	0.1	0	Random Only
'5HLTDL'	0.901471	0.0750717	0.913107	0.00448488	0.752874	0.0652703	177	6000	995	84.689	100	99.5	1	Both
'5HOXINDACTO2OX'	1	1	1	1	0.99976	0.00315174	0	0	1	0	0	0.1	0	Random Only
'5HOXINDACTOX'	1	1	1	1	0.99976	0.00315174	0	0	1	0	0	0.1	0	Random Only
'5HOXINDACTOXm'	1	1	1	1	0.99976	0.00315174	0	0	1	0	0	0.1	0	Random Only
'5HOXINOXDA'	1	1	1	1	0.99976	0.00315174	0	0	1	0	0	0.1	0	Random Only
'5HTRPDOX'	1	1	1	1	0.99976	0.00315174	0	0	1	0	0	0.1	0	Random Only
'5HTRPVESSEC'	0.901471	0.0750717	0.913107	0.00448488	0.752874	0.0652703	177	6000	995	84.689	100	99.5	1	Both
'5HXKYNDCL'	1	1	1	1	0.99976	0.00315174	0	0	1	0	0	0.1	0	Random Only
'5HXKYNOXDA'	1	1	1	1	0.99976	0.00315174	0	0	1	0	0	0.1	0	Random Only
'5MTHFt'	1	1	1	1	0.99976	0.00315174	0	0	1	0	0	0.1	0	Random Only
'5MTHFt2'	1	1	1	1	0.99976	0.00315174	0	0	1	0	0	0.1	0	Random Only
'5THFtl'	0.992823	0.0596155	1	1	0.99976	0.00315174	3	0	1	1.43541	0	0.1	0	Random Only
'5THFtm'	0.992823	0.0596155	1	1	0.99976	0.00315174	3	0	1	1.43541	0	0.1	0	Random Only
'6DHFtl'	0.992823	0.0596155	1	1	0.99976	0.00315174	3	0	1	1.43541	0	0.1	0	Random Only
'6DHFtm'	0.992823	0.0596155	1	1	0.99976	0.00315174	3	0	1	1.43541	0	0.1	0	Random Only
'6HTSTSTERONEte'	1	1	1	1	0.99976	0.00315174	0	0	1	0	0	0.1	0	Random Only
'6THFtl'	0.992823	0.0596155	1	1	0.99976	0.00315174	3	0	1	1.43541	0	0.1	0	Random Only
'6THFtm'	0.992823	0.0596155	1	1	0.99976	0.00315174	3	0	1	1.43541	0	0.1	0	Random Only
'7DHCHSTEROLtr'	0.99314	0.0569797	1	1	0.99976	0.00315174	3	0	1	1.43541	0	0.1	0	Random Only
'7DHFtl'	0.992823	0.0596155	1	1	0.99976	0.00315174	3	0	1	1.43541	0	0.1	0	Random Only
'7DHFtm'	0.992823	0.0596155	1	1	0.99976	0.00315174	3	0	1	1.43541	0	0.1	0	Random Only
'7THFtl'	0.992823	0.0596155	1	1	0.99976	0.00315174	3	0	1	1.43541	0	0.1	0	Random Only
'7THFtm'	0.992823	0.0596155	1	1	0.99976	0.00315174	3	0	1	1.43541	0	0.1	0	Random Only
'A4GALTc'	1	1	1	1	0.99976	0.00315174	0	0	1	0	0	0.1	0	Random Only
'A4GALTg'	1	1	1	1	0.99976	0.00315174	0	0	1	0	0	0.1	0	Random Only
'AACOAT'	0.992823	0.0596155	1	1	0.99976	0.00315174	3	0	1	1.43541	0	0.1	0	Random Only
'ABO1g'	1	1	1	1	0.99976	0.00315174	0	0	1	0	0	0.1	0	Random Only
'ABO2g'	1	1	1	1	0.99976	0.00315174	0	0	1	0	0	0.1	0	Random Only
'ABO3g'	1	1	1	1	0.99976	0.00315174	0	0	1	0	0	0.1	0	Random Only
'ABO4g'	1	1	1	1	0.99976	0.00315174	0	0	1	0	0	0.1	0	Random Only
'ABO5g'	1	1	1	1	0.99976	0.00315174	0	0	1	0	0	0.1	0	Random Only
'ABO6g'	1	1	1	1	0.99976	0.00315174	0	0	1	0	0	0.1	0	Random Only
'ABO7g'	1	1	1	1	0.99976	0.00315174	0	0	1	0	0	0.1	0	Random Only
'ABO8g'	1	1	1	1	0.99976	0.00315174	0	0	1	0	0	0.1	0	Random Only
'ABO9g'	1	1	1	1	0.99976	0.00315174	0	0	1	0	0	0.1	0	Random Only
'ABTArm'	0.99417	0.0484336	1	1	0.99976	0.00315174	3	0	1	1.43541	0	0.1	0	Random Only
'ABTD'	0.993295	0.0556941	1	1	0.99976	0.00315174	3	0	1	1.43541	0	0.1	0	Random Only
'ABTti'	0.993295	0.0556941	1	1	0.99976	0.00315174	3	0	1	1.43541	0	0.1	0	Random Only
'ABUTD'	0.993194	0.05653	1	1	0.99976	0.00315174	3	0	1	1.43541	0	0.1	0	Random Only
'ABUTt2r'	1	1	1	1	0.99976	0.00315174	0	0	1	0	0	0.1	0	Random Only
'ABUTt2rL'	1	1	1	1	0.99976	0.00315174	0	0	1	0	0	0.1	0	Random Only
'ABUTt4(2)r'	1	1	1	1	0.99976	0.00315174	0	0	1	0	0	0.1	0	Random Only
'ACACT1'	1	1	1	1	0.99976	0.00315174	0	0	1	0	0	0.1	0	Random Only
'ACACT10m'	1	1	1	1	0.99976	0.00315174	0	0	1	0	0	0.1	0	Random Only
'ACACT1r'	0.992823	0.0596155	1	1	0.99976	0.00315174	3	0	1	1.43541	0	0.1	0	Random Only
'ACACT1rm'	0.992823	0.0596155	1	1	0.99976	0.00315174	3	0	1	1.43541	0	0.1	0	Random Only
'ACACT1x'	1	1	1	1	0.99976	0.00315174	0	0	1	0	0	0.1	0	Random Only
'ACACT4p'	1	1	1	1	0.99976	0.00315174	0	0	1	0	0	0.1	0	Random Only
'ACACT5p'	1	1	1	1	0.99976	0.00315174	0	0	1	0	0	0.1	0	Random Only
'ACACT6p'	1	1	1	1	0.99976	0.00315174	0	0	1	0	0	0.1	0	Random Only
'ACACT7p'	1	1	1	1	0.99976	0.00315174	0	0	1	0	0	0.1	0	Random Only
'ACACT8p'	1	1	1	1	0.99976	0.00315174	0	0	1	0	0	0.1	0	Random Only
'ACACT9p'	1	1	1	1	0.99976	0.00315174	0	0	1	0	0	0.1	0	Random Only
'ACACt2'	0.992823	0.0596155	1	1	0.99976	0.00315174	3	0	1	1.43541	0	0.1	0	Random Only
'ACACt2m'	0.992823	0.0596155	1	1	0.99976	0.00315174	3	0	1	1.43541	0	0.1	0	Random Only
'ACACtx'	0.993606	0.0531146	1	1	0.99976	0.00315174	3	0	1	1.43541	0	0.1	0	Random Only
'ACALDt'	1	1	1	1	0.99976	0.00315174	0	0	1	0	0	0.1	0	Random Only
'ACALDtm'	1	1	1	1	0.99976	0.00315174	0	0	1	0	0	0.1	0	Random Only
'ACALDtr'	1	1	1	1	0.99976	0.00315174	0	0	1	0	0	0.1	0	Random Only
'ACALDtx'	1	1	1	1	0.99976	0.00315174	0	0	1	0	0	0.1	0	Random Only
'ACCOAC'	0.992823	0.0596155	1	1	0.99976	0.00315174	3	0	1	1.43541	0	0.1	0	Random Only
'ACCOACm'	0.992823	0.0596155	1	1	0.99976	0.00315174	3	0	1	1.43541	0	0.1	0	Random Only
'ACCOAL'	1	1	1	1	0.99976	0.00315174	0	0	1	0	0	0.1	0	Random Only
'ACCOALm'	1	1	1	1	0.99976	0.00315174	0	0	1	0	0	0.1	0	Random Only
'ACCOAgt'	1	1	1	1	0.99976	0.00315174	0	0	1	0	0	0.1	0	Random Only
'ACCOAtn'	1	1	1	1	0.99976	0.00315174	0	0	1	0	0	0.1	0	Random Only
'ACCOAtr'	1	1	1	1	0.99976	0.00315174	0	0	1	0	0	0.1	0	Random Only
'ACETONEt2'	0.992823	0.0596155	1	1	0.99976	0.00315174	3	0	1	1.43541	0	0.1	0	Random Only
'ACETONEt2m'	0.992823	0.0596155	1	1	0.99976	0.00315174	3	0	1	1.43541	0	0.1	0	Random Only
'ACGAGBSIDEtg'	1	1	1	1	0.99976	0.00315174	0	0	1	0	0	0.1	0	Random Only
'ACGAGBSIDEtl'	1	1	1	1	0.99976	0.00315174	0	0	1	0	0	0.1	0	Random Only
'ACGALFUCGALACGALFUC12GAL14ACGLCGALGLUSIDEte'	1	1	1	1	0.99976	0.00315174	0	0	1	0	0	0.1	0	Random Only
'ACGALFUCGALACGALFUC12GAL14ACGLCGALGLUSIDEtg'	1	1	1	1	0.99976	0.00315174	0	0	1	0	0	0.1	0	Random Only
'ACGALFUCGALACGALFUCGALACGLCGAL14ACGLCGALGLUSIDEte'	1	1	1	1	0.99976	0.00315174	0	0	1	0	0	0.1	0	Random Only
'ACGALFUCGALACGALFUCGALACGLCGAL14ACGLCGALGLUSIDEtg'	1	1	1	1	0.99976	0.00315174	0	0	1	0	0	0.1	0	Random Only
'ACGALtly'	1	1	1	1	0.99976	0.00315174	0	0	1	0	0	0.1	0	Random Only
'ACGAM2E'	1	1	1	1	0.99976	0.00315174	0	0	1	0	0	0.1	0	Random Only
'ACGAM6PSi'	0.993577	0.053351	1	1	0.999403	0.00516919	3	0	6	1.43541	0	0.6	0	Random Only
'ACGAMK'	0.992823	0.0596155	1	1	0.99976	0.00315174	3	0	1	1.43541	0	0.1	0	Random Only
'ACGAMPM'	0.992823	0.0596155	1	1	0.99976	0.00315174	3	0	1	1.43541	0	0.1	0	Random Only
'ACGAMtly'	0.992823	0.0596155	1	1	0.99976	0.00315174	3	0	1	1.43541	0	0.1	0	Random Only
'ACGPID'	1	1	1	1	0.99976	0.00315174	0	0	1	0	0	0.1	0	Random Only
'ACHEe'	1	1	1	1	0.99976	0.00315174	0	0	1	0	0	0.1	0	Random Only
'ACHVESSEC'	1	1	1	1	0.99976	0.00315174	0	0	1	0	0	0.1	0	Random Only
'ACITL'	0.992823	0.0596155	1	1	0.99976	0.00315174	3	0	1	1.43541	0	0.1	0	Random Only
'ACN13ACNGALGBSIDEte'	1	1	1	1	0.99976	0.00315174	0	0	1	0	0	0.1	0	Random Only
'ACN13ACNGALGBSIDEtg'	1	1	1	1	0.99976	0.00315174	0	0	1	0	0	0.1	0	Random Only
'ACN23ACNGALGBSIDEte'	1	1	1	1	0.99976	0.00315174	0	0	1	0	0	0.1	0	Random Only
'ACN23ACNGALGBSIDEtg'	1	1	1	1	0.99976	0.00315174	0	0	1	0	0	0.1	0	Random Only
'ACNACNGAL14ACGLCGALGLUSIDEte'	1	1	1	1	0.99976	0.00315174	0	0	1	0	0	0.1	0	Random Only
'ACNACNGAL14ACGLCGALGLUSIDEtg'	1	1	1	1	0.99976	0.00315174	0	0	1	0	0	0.1	0	Random Only
'ACNACNGALGBSIDEte'	1	1	1	1	0.99976	0.00315174	0	0	1	0	0	0.1	0	Random Only
'ACNACNGALGBSIDEtg'	1	1	1	1	0.99976	0.00315174	0	0	1	0	0	0.1	0	Random Only
'ACNAM9PL'	0.992843	0.0594488	1	1	0.99976	0.00315174	3	0	1	1.43541	0	0.1	0	Random Only
'ACNAM9PL2'	0.992991	0.0582168	1	1	0.99976	0.00315174	3	0	1	1.43541	0	0.1	0	Random Only
'ACNAMPH'	0.992843	0.0594488	1	1	0.99976	0.00315174	3	0	1	1.43541	0	0.1	0	Random Only
'ACNAMlt'	0.992845	0.0594299	1	1	0.99976	0.00315174	3	0	1	1.43541	0	0.1	0	Random Only
'ACNAMtn'	0.992846	0.0594263	1	1	0.99976	0.00315174	3	0	1	1.43541	0	0.1	0	Random Only
'ACNGALACGLCGAL14ACGLCGALGLUSIDEte'	1	1	1	1	0.99976	0.00315174	0	0	1	0	0	0.1	0	Random Only
'ACNGALACGLCGAL14ACGLCGALGLUSIDEtg'	1	1	1	1	0.99976	0.00315174	0	0	1	0	0	0.1	0	Random Only
'ACNMLr'	0.992843	0.0594488	1	1	0.99976	0.00315174	3	0	1	1.43541	0	0.1	0	Random Only
'ACOAD10m'	1	1	1	1	0.99976	0.00315174	0	0	1	0	0	0.1	0	Random Only
'ACOAD1fm'	1	1	1	1	0.99976	0.00315174	0	0	1	0	0	0.1	0	Random Only
'ACOAD8m'	0.991505	0.0598998	1	1	0.999457	0.00478387	3	0	3	1.43541	0	0.3	0	Random Only
'ACOAD9m'	0.98526	0.0651787	1	1	0.999662	0.00347166	15	0	1	7.17703	0	0.1	0	Random Only
'ACOAHi'	0.992823	0.0596155	1	1	0.99976	0.00315174	3	0	1	1.43541	0	0.1	0	Random Only
'ACOAO7p'	0.992823	0.0596155	1	1	0.99976	0.00315174	3	0	1	1.43541	0	0.1	0	Random Only
'ACOATA'	1	1	1	1	0.99976	0.00315174	0	0	1	0	0	0.1	0	Random Only
'ACODA'	1	1	1	1	0.99976	0.00315174	0	0	1	0	0	0.1	0	Random Only
'ACONT'	0.992876	0.0591757	1	1	0.99976	0.00315174	3	0	1	1.43541	0	0.1	0	Random Only
'ACONTm'	0.991331	0.0599285	1	1	0.999759	0.00315187	8	0	1	3.82775	0	0.1	0	Random Only
'ACOX22x'	1	1	1	1	0.99976	0.00315174	0	0	1	0	0	0.1	0	Random Only
'ACOX2x'	1	1	1	1	0.99976	0.00315174	0	0	1	0	0	0.1	0	Random Only
'ACP1(FMN)'	0.992823	0.0596155	1	1	0.99976	0.00315174	3	0	1	1.43541	0	0.1	0	Random Only
'ACRNtm'	0.992823	0.0596155	1	1	0.99976	0.00315174	3	0	1	1.43541	0	0.1	0	Random Only
'ACS'	0.992823	0.0596155	1	1	0.99976	0.00315174	3	0	1	1.43541	0	0.1	0	Random Only
'ACS2'	1	1	1	1	0.99976	0.00315174	0	0	1	0	0	0.1	0	Random Only
'ACSm'	0.992823	0.0596155	1	1	0.99976	0.00315174	3	0	1	1.43541	0	0.1	0	Random Only
'ACTLMO'	0.992823	0.0596155	1	1	0.99976	0.00315174	3	0	1	1.43541	0	0.1	0	Random Only
'ACTNMO'	0.994082	0.049159	1	1	0.99976	0.00315174	3	0	1	1.43541	0	0.1	0	Random Only
'ACYP'	0.992823	0.0596155	1	1	0.99976	0.00315174	3	0	1	1.43541	0	0.1	0	Random Only
'ACt2m'	0.992823	0.0596155	1	1	0.99976	0.00315174	3	0	1	1.43541	0	0.1	0	Random Only
'ACt2r'	0.992823	0.0596155	1	1	0.99976	0.00315174	3	0	1	1.43541	0	0.1	0	Random Only
'ACtg'	1	1	1	1	0.99976	0.00315174	0	0	1	0	0	0.1	0	Random Only
'ADA'	0.992823	0.0596134	1	1	0.99976	0.00315174	3	0	1	1.43541	0	0.1	0	Random Only
'ADAe'	0.992823	0.0596134	1	1	0.99976	0.00315174	3	0	1	1.43541	0	0.1	0	Random Only
'ADCim'	0.992823	0.0596155	1	1	0.99976	0.00315174	3	0	1	1.43541	0	0.1	0	Random Only
'ADEt'	0.979208	0.069581	1	1	0.99386	0.0218779	30	0	41	14.3541	0	4.1	0	Random Only
'ADEtl'	1	1	1	1	0.99976	0.00315174	0	0	1	0	0	0.1	0	Random Only
'ADHAPtx'	1	1	1	1	0.99976	0.00315174	0	0	1	0	0	0.1	0	Random Only
'ADK1'	1	1	1	1	0.99976	0.00315174	0	0	1	0	0	0.1	0	Random Only
'ADK1m'	1	1	1	1	0.99976	0.00315174	0	0	1	0	0	0.1	0	Random Only
'ADK3'	1	1	1	1	0.99976	0.00315174	0	0	1	0	0	0.1	0	Random Only
'ADK3m'	1	1	1	1	0.99976	0.00315174	0	0	1	0	0	0.1	0	Random Only
'ADKd'	0.979208	0.069581	1	1	0.996086	0.0180995	30	0	21	14.3541	0	2.1	0	Random Only
'ADMDC'	1	1	1	1	0.99976	0.00315174	0	0	1	0	0	0.1	0	Random Only
'ADNCYC'	0.992823	0.0596155	1	1	0.99976	0.00315174	3	0	1	1.43541	0	0.1	0	Random Only
'ADNK1'	0.992823	0.0596155	1	1	0.99976	0.00315174	3	0	1	1.43541	0	0.1	0	Random Only
'ADNK1m'	0.988997	0.0566119	1	1	0.999007	0.00826945	13	0	9	6.2201	0	0.9	0	Random Only
'ADNt'	1	1	1	1	0.99976	0.00315174	0	0	1	0	0	0.1	0	Random Only
'ADNt4'	1	1	1	1	0.99976	0.00315174	0	0	1	0	0	0.1	0	Random Only
'ADNt5'	1	1	1	1	0.99976	0.00315174	0	0	1	0	0	0.1	0	Random Only
'ADNtl'	1	1	1	1	0.99976	0.00315174	0	0	1	0	0	0.1	0	Random Only
'ADNtm'	0.988997	0.0566119	1	1	0.999007	0.00826945	13	0	9	6.2201	0	0.9	0	Random Only
'ADPGLC'	1	1	1	1	0.99976	0.00315174	0	0	1	0	0	0.1	0	Random Only
'ADPMAN'	1	1	1	1	0.99976	0.00315174	0	0	1	0	0	0.1	0	Random Only
'ADPRDP'	0.992823	0.0596155	1	1	0.99976	0.00315174	3	0	1	1.43541	0	0.1	0	Random Only
'ADPRDPm'	1	1	1	1	0.99976	0.00315174	0	0	1	0	0	0.1	0	Random Only
'ADPRIBt'	1	1	1	1	0.99976	0.00315174	0	0	1	0	0	0.1	0	Random Only
'ADPT'	0.992823	0.0596155	1	1	0.99976	0.00315174	3	0	1	1.43541	0	0.1	0	Random Only
'ADPtx'	0.99314	0.0569797	1	1	0.99976	0.00315174	3	0	1	1.43541	0	0.1	0	Random Only
'ADRNCOAtx'	1	1	1	1	0.99976	0.00315174	0	0	1	0	0	0.1	0	Random Only
'ADRNCPT1'	1	1	1	1	0.99976	0.00315174	0	0	1	0	0	0.1	0	Random Only
'ADRNCPT2'	1	1	1	1	0.99976	0.00315174	0	0	1	0	0	0.1	0	Random Only
'ADRNCRNt'	1	1	1	1	0.99976	0.00315174	0	0	1	0	0	0.1	0	Random Only
'ADRNLPVESSEC'	1	1	1	1	0.99976	0.00315174	0	0	1	0	0	0.1	0	Random Only
'ADRNt'	1	1	1	1	0.99976	0.00315174	0	0	1	0	0	0.1	0	Random Only
'ADSELK'	1	1	1	1	0.99976	0.00315174	0	0	1	0	0	0.1	0	Random Only
'ADSK'	0.992823	0.0596155	1	1	0.99976	0.00315174	3	0	1	1.43541	0	0.1	0	Random Only
'ADSL1'	0.7076	0.059351	0.711339	0.000939101	0.798318	0.091973	204	6000	931	97.6077	100	93.1	1	Both
'ADSL2'	0.698098	0.0385676	0.710222	0.000930407	0.754012	0.0714812	209	6000	992	100	100	99.2	1	Both
'ADSS'	0.7076	0.059351	0.711339	0.000939101	0.798318	0.091973	204	6000	931	97.6077	100	93.1	1	Both
'AFLATOXINte'	1	1	1	1	0.99976	0.00315174	0	0	1	0	0	0.1	0	Random Only
'AG13T10g'	1	1	1	1	0.99976	0.00315174	0	0	1	0	0	0.1	0	Random Only
'AG13T11g'	1	1	1	1	0.99976	0.00315174	0	0	1	0	0	0.1	0	Random Only
'AG13T12g'	1	1	1	1	0.99976	0.00315174	0	0	1	0	0	0.1	0	Random Only
'AG13T13g'	1	1	1	1	0.99976	0.00315174	0	0	1	0	0	0.1	0	Random Only
'AG13T14g'	1	1	1	1	0.99976	0.00315174	0	0	1	0	0	0.1	0	Random Only
'AG13T15g'	1	1	1	1	0.99976	0.00315174	0	0	1	0	0	0.1	0	Random Only
'AG13T16g'	1	1	1	1	0.99976	0.00315174	0	0	1	0	0	0.1	0	Random Only
'AG13T17g'	1	1	1	1	0.99976	0.00315174	0	0	1	0	0	0.1	0	Random Only
'AG13T18g'	1	1	1	1	0.99976	0.00315174	0	0	1	0	0	0.1	0	Random Only
'AG13T1g'	0.992845	0.0594299	1	1	0.99976	0.00315174	3	0	1	1.43541	0	0.1	0	Random Only
'AG13T2g'	0.992845	0.0594299	1	1	0.99976	0.00315174	3	0	1	1.43541	0	0.1	0	Random Only
'AG13T3g'	0.992845	0.0594299	1	1	0.99976	0.00315174	3	0	1	1.43541	0	0.1	0	Random Only
'AG13T4g'	1	1	1	1	0.99976	0.00315174	0	0	1	0	0	0.1	0	Random Only
'AG13T5g'	1	1	1	1	0.99976	0.00315174	0	0	1	0	0	0.1	0	Random Only
'AG13T6g'	1	1	1	1	0.99976	0.00315174	0	0	1	0	0	0.1	0	Random Only
'AG13T7g'	1	1	1	1	0.99976	0.00315174	0	0	1	0	0	0.1	0	Random Only
'AG13T8g'	1	1	1	1	0.99976	0.00315174	0	0	1	0	0	0.1	0	Random Only
'AG13T9g'	1	1	1	1	0.99976	0.00315174	0	0	1	0	0	0.1	0	Random Only
'AGLPC'	1	1	1	1	0.99976	0.00315174	0	0	1	0	0	0.1	0	Random Only
'AGLPED'	1	1	1	1	0.99976	0.00315174	0	0	1	0	0	0.1	0	Random Only
'AGLPET'	1	1	1	1	0.99976	0.00315174	0	0	1	0	0	0.1	0	Random Only
'AGLPH'	1	1	1	1	0.99976	0.00315174	0	0	1	0	0	0.1	0	Random Only
'AGLPR'	1	1	1	1	0.99976	0.00315174	0	0	1	0	0	0.1	0	Random Only
'AGLPT'	1	1	1	1	0.99976	0.00315174	0	0	1	0	0	0.1	0	Random Only
'AGMTm'	1	1	1	1	0.99976	0.00315174	0	0	1	0	0	0.1	0	Random Only
'AGPAT1'	1	1	1	1	0.99976	0.00315174	0	0	1	0	0	0.1	0	Random Only
'AGPRim'	1	1	1	1	0.99976	0.00315174	0	0	1	0	0	0.1	0	Random Only
'AGPSx'	1	1	1	1	0.99976	0.00315174	0	0	1	0	0	0.1	0	Random Only
'AGPex'	1	1	1	1	0.99976	0.00315174	0	0	1	0	0	0.1	0	Random Only
'AHANDROSTANGLCte'	1	1	1	1	0.99976	0.00315174	0	0	1	0	0	0.1	0	Random Only
'AHANDROSTANGLCtr'	1	1	1	1	0.99976	0.00315174	0	0	1	0	0	0.1	0	Random Only
'AHC'	0.984927	0.0650926	1	1	0.921015	0.0616178	18	0	631	8.61244	0	63.1	1	Random Only
'AHCYStn'	1	1	1	1	0.99976	0.00315174	0	0	1	0	0	0.1	0	Random Only
'AHCYStr'	0.992881	0.058938	1	1	0.999471	0.00461899	3	0	1	1.43541	0	0.1	0	Random Only
'AHEXASE2ly'	0.992823	0.0596155	1	1	0.99976	0.00315174	3	0	1	1.43541	0	0.1	0	Random Only
'AHEXASEly'	1	1	1	1	0.99976	0.00315174	0	0	1	0	0	0.1	0	Random Only
'AICART'	0.698098	0.0385676	0.710222	0.000930407	0.754012	0.0714812	209	6000	992	100	100	99.2	1	Both
'AIRCr'	0.698098	0.0385676	0.710222	0.000930407	0.754012	0.0714812	209	6000	992	100	100	99.2	1	Both
'AK2LGCHOLt'	0.992823	0.0596155	1	1	0.99976	0.00315174	3	0	1	1.43541	0	0.1	0	Random Only
'AKGDm'	0.992823	0.0596155	1	1	0.99976	0.00315174	3	0	1	1.43541	0	0.1	0	Random Only
'AKGMALtm'	0.992823	0.0596155	1	1	0.99976	0.00315174	3	0	1	1.43541	0	0.1	0	Random Only
'AKGt4_3'	0.99143	0.06025	1	1	0.99976	0.00315174	6	0	1	2.87081	0	0.1	0	Random Only
'AKGtp'	1	1	1	1	0.99976	0.00315174	0	0	1	0	0	0.1	0	Random Only
'AKR1C41'	1	1	1	1	0.99976	0.00315174	0	0	1	0	0	0.1	0	Random Only
'AKR1C42'	1	1	1	1	0.99976	0.00315174	0	0	1	0	0	0.1	0	Random Only
'ALAASNNaEx'	1	1	1	1	0.99976	0.00315174	0	0	1	0	0	0.1	0	Random Only
'ALACYSNaEx'	1	1	1	1	0.99976	0.00315174	0	0	1	0	0	0.1	0	Random Only
'ALADGLNexR'	1	1	1	1	0.99976	0.00315174	0	0	1	0	0	0.1	0	Random Only
'ALADGLYexR'	1	1	1	1	0.99976	0.00315174	0	0	1	0	0	0.1	0	Random Only
'ALAGLNNaEx'	1	1	1	1	0.99976	0.00315174	0	0	1	0	0	0.1	0	Random Only
'ALAGLNexR'	1	1	1	1	0.99976	0.00315174	0	0	1	0	0	0.1	0	Random Only
'ALAGLYexR'	1	1	1	1	0.99976	0.00315174	0	0	1	0	0	0.1	0	Random Only
'ALAR'	0.992823	0.0596155	1	1	0.99976	0.00315174	3	0	1	1.43541	0	0.1	0	Random Only
'ALASERNaEx'	1	1	1	1	0.99976	0.00315174	0	0	1	0	0	0.1	0	Random Only
'ALASm'	1	1	1	1	0.99976	0.00315174	0	0	1	0	0	0.1	0	Random Only
'ALATA_L'	0.992823	0.0596155	1	1	0.99976	0.00315174	3	0	1	1.43541	0	0.1	0	Random Only
'ALATHRNaEx'	1	1	1	1	0.99976	0.00315174	0	0	1	0	0	0.1	0	Random Only
'ALAt2r'	1	1	1	1	0.99976	0.00315174	0	0	1	0	0	0.1	0	Random Only
'ALAt2rL'	1	1	1	1	0.99976	0.00315174	0	0	1	0	0	0.1	0	Random Only
'ALAt4'	1	1	1	1	0.99976	0.00315174	0	0	1	0	0	0.1	0	Random Only
'ALAtN1'	1	1	1	1	0.99976	0.00315174	0	0	1	0	0	0.1	0	Random Only
'ALCD1'	0.992823	0.0596155	1	1	0.99976	0.00315174	3	0	1	1.43541	0	0.1	0	Random Only
'ALCD21_D'	1	1	1	1	0.99976	0.00315174	0	0	1	0	0	0.1	0	Random Only
'ALCD21_L'	1	1	1	1	0.99976	0.00315174	0	0	1	0	0	0.1	0	Random Only
'ALCD22_D'	1	1	1	1	0.99976	0.00315174	0	0	1	0	0	0.1	0	Random Only
'ALCD22_L'	1	1	1	1	0.99976	0.00315174	0	0	1	0	0	0.1	0	Random Only
'ALCD2yf'	1	1	1	1	0.99976	0.00315174	0	0	1	0	0	0.1	0	Random Only
'ALDD20x'	1	1	1	1	0.99976	0.00315174	0	0	1	0	0	0.1	0	Random Only
'ALDD20xm'	1	1	1	1	0.99976	0.00315174	0	0	1	0	0	0.1	0	Random Only
'ALDD21'	1	1	1	1	0.99976	0.00315174	0	0	1	0	0	0.1	0	Random Only
'ALDD2x'	1	1	1	1	0.99976	0.00315174	0	0	1	0	0	0.1	0	Random Only
'ALDD2xm'	1	1	1	1	0.99976	0.00315174	0	0	1	0	0	0.1	0	Random Only
'ALDD2y'	1	1	1	1	0.99976	0.00315174	0	0	1	0	0	0.1	0	Random Only
'ALDSTRNte'	1	1	1	1	0.99976	0.00315174	0	0	1	0	0	0.1	0	Random Only
'ALKP'	1	1	1	1	0.99976	0.00315174	0	0	1	0	0	0.1	0	Random Only
'ALOX12'	1	1	1	1	0.99976	0.00315174	0	0	1	0	0	0.1	0	Random Only
'ALOX12R'	1	1	1	1	0.99976	0.00315174	0	0	1	0	0	0.1	0	Random Only
'ALOX15'	1	1	1	1	0.99976	0.00315174	0	0	1	0	0	0.1	0	Random Only
'ALOX5'	1	1	1	1	0.99976	0.00315174	0	0	1	0	0	0.1	0	Random Only
'ALOX52'	1	1	1	1	0.99976	0.00315174	0	0	1	0	0	0.1	0	Random Only
'ALR'	0.992843	0.0594488	1	1	0.99976	0.00315174	3	0	1	1.43541	0	0.1	0	Random Only
'ALR2'	1	1	1	1	0.99976	0.00315174	0	0	1	0	0	0.1	0	Random Only
'ALR3'	1	1	1	1	0.99976	0.00315174	0	0	1	0	0	0.1	0	Random Only
'AM6SAD'	1	1	1	1	0.99976	0.00315174	0	0	1	0	0	0.1	0	Random Only
'AMACR2p'	1	1	1	1	0.99976	0.00315174	0	0	1	0	0	0.1	0	Random Only
'AMACR2r'	1	1	1	1	0.99976	0.00315174	0	0	1	0	0	0.1	0	Random Only
'AMACRp'	1	1	1	1	0.99976	0.00315174	0	0	1	0	0	0.1	0	Random Only
'AMACRr'	1	1	1	1	0.99976	0.00315174	0	0	1	0	0	0.1	0	Random Only
'AMANK'	0.992843	0.0594488	1	1	0.99976	0.00315174	3	0	1	1.43541	0	0.1	0	Random Only
'AMCOXO'	1	1	1	1	0.99976	0.00315174	0	0	1	0	0	0.1	0	Random Only
'AMETr'	0.992881	0.058938	1	1	0.999471	0.00461899	3	0	1	1.43541	0	0.1	0	Random Only
'AMETt2m'	0.992833	0.0593336	1	1	0.999516	0.0042876	3	0	1	1.43541	0	0.1	0	Random Only
'AMETtn'	1	1	1	1	0.99976	0.00315174	0	0	1	0	0	0.1	0	Random Only
'AMPDA'	0.992954	0.0585268	1	1	0.99976	0.00315174	3	0	1	1.43541	0	0.1	0	Random Only
'AMPTASECG'	0.992823	0.0596155	1	1	0.99976	0.00315174	3	0	1	1.43541	0	0.1	0	Random Only
'AMPTASECGe'	0.992823	0.0596155	1	1	0.99976	0.00315174	3	0	1	1.43541	0	0.1	0	Random Only
'AMPtp'	1	1	1	1	0.99976	0.00315174	0	0	1	0	0	0.1	0	Random Only
'AMPtr'	1	1	1	1	0.99976	0.00315174	0	0	1	0	0	0.1	0	Random Only
'AMY1e'	1	1	1	1	0.99976	0.00315174	0	0	1	0	0	0.1	0	Random Only
'AMY2e'	1	1	1	1	0.99976	0.00315174	0	0	1	0	0	0.1	0	Random Only
'ANDRSTRNGLCte'	1	1	1	1	0.99976	0.00315174	0	0	1	0	0	0.1	0	Random Only
'ANDRSTRNGLCtr'	1	1	1	1	0.99976	0.00315174	0	0	1	0	0	0.1	0	Random Only
'ANDRSTRNte'	1	1	1	1	0.99976	0.00315174	0	0	1	0	0	0.1	0	Random Only
'ANDRSTRNtr'	1	1	1	1	0.99976	0.00315174	0	0	1	0	0	0.1	0	Random Only
'AP4AH1'	1	1	1	1	0.99976	0.00315174	0	0	1	0	0	0.1	0	Random Only
'APAT2rm'	1	1	1	1	0.99976	0.00315174	0	0	1	0	0	0.1	0	Random Only
'APRTO2'	1	1	1	1	0.99976	0.00315174	0	0	1	0	0	0.1	0	Random Only
'AQCOBALt'	1	1	1	1	0.99976	0.00315174	0	0	1	0	0	0.1	0	Random Only
'ARAB-Lt'	1	1	1	1	0.99976	0.00315174	0	0	1	0	0	0.1	0	Random Only
'ARABR'	1	1	1	1	0.99976	0.00315174	0	0	1	0	0	0.1	0	Random Only
'ARACHCOAtx'	1	1	1	1	0.99976	0.00315174	0	0	1	0	0	0.1	0	Random Only
'ARACHCPT1'	1	1	1	1	0.99976	0.00315174	0	0	1	0	0	0.1	0	Random Only
'ARACHCPT2'	1	1	1	1	0.99976	0.00315174	0	0	1	0	0	0.1	0	Random Only
'ARACHCRNt'	1	1	1	1	0.99976	0.00315174	0	0	1	0	0	0.1	0	Random Only
'ARACHDCOAtx'	1	1	1	1	0.99976	0.00315174	0	0	1	0	0	0.1	0	Random Only
'ARACHDt2'	1	1	1	1	0.99976	0.00315174	0	0	1	0	0	0.1	0	Random Only
'ARACHDtr'	1	1	1	1	0.99976	0.00315174	0	0	1	0	0	0.1	0	Random Only
'ARACHt'	1	1	1	1	0.99976	0.00315174	0	0	1	0	0	0.1	0	Random Only
'ARGDCm'	1	1	1	1	0.99976	0.00315174	0	0	1	0	0	0.1	0	Random Only
'ARGLYSex'	1	1	1	1	0.99976	0.00315174	0	0	1	0	0	0.1	0	Random Only
'ARGN'	0.980362	0.068503	1	1	0.995386	0.0188422	30	0	27	14.3541	0	2.7	0	Random Only
'ARGNm'	0.980362	0.068503	1	1	0.995386	0.0188422	30	0	27	14.3541	0	2.7	0	Random Only
'ARGSL'	0.991083	0.0589615	1	1	0.998879	0.00921074	8	0	9	3.82775	0	0.9	0	Random Only
'ARGSS'	0.991083	0.0589615	1	1	0.998879	0.00921074	8	0	9	3.82775	0	0.9	0	Random Only
'ARGt4'	1	1	1	1	0.99976	0.00315174	0	0	1	0	0	0.1	0	Random Only
'ARGtiDF'	1	1	1	1	0.99976	0.00315174	0	0	1	0	0	0.1	0	Random Only
'ARGtm'	0.980362	0.068503	1	1	0.995386	0.0188422	30	0	27	14.3541	0	2.7	0	Random Only
'ARSA'	1	1	1	1	0.99976	0.00315174	0	0	1	0	0	0.1	0	Random Only
'ARTCOAL1'	0.994259	0.0497866	1	1	0.99976	0.00315174	3	0	1	1.43541	0	0.1	0	Random Only
'ARTCOAL2'	0.994259	0.0497866	1	1	0.99976	0.00315174	3	0	1	1.43541	0	0.1	0	Random Only
'ARTCOAL3'	0.994259	0.0497866	1	1	0.99976	0.00315174	3	0	1	1.43541	0	0.1	0	Random Only
'ARTFR11'	1	1	1	1	0.99976	0.00315174	0	0	1	0	0	0.1	0	Random Only
'ARTFR12'	0.992823	0.0596155	1	1	0.99976	0.00315174	3	0	1	1.43541	0	0.1	0	Random Only
'ARTFR13'	0.993123	0.0571305	1	1	0.99976	0.00315174	3	0	1	1.43541	0	0.1	0	Random Only
'ARTFR202'	1	1	1	1	0.99976	0.00315174	0	0	1	0	0	0.1	0	Random Only
'ARTFR203'	1	1	1	1	0.99976	0.00315174	0	0	1	0	0	0.1	0	Random Only
'ARTFR204'	1	1	1	1	0.99976	0.00315174	0	0	1	0	0	0.1	0	Random Only
'ARTFR205'	1	1	1	1	0.99976	0.00315174	0	0	1	0	0	0.1	0	Random Only
'ARTFR206'	1	1	1	1	0.99976	0.00315174	0	0	1	0	0	0.1	0	Random Only
'ARTFR207'	1	1	1	1	0.99976	0.00315174	0	0	1	0	0	0.1	0	Random Only
'ARTFR208'	1	1	1	1	0.99976	0.00315174	0	0	1	0	0	0.1	0	Random Only
'ARTFR209'	1	1	1	1	0.99976	0.00315174	0	0	1	0	0	0.1	0	Random Only
'ARTFR210'	1	1	1	1	0.99976	0.00315174	0	0	1	0	0	0.1	0	Random Only
'ARTFR211'	1	1	1	1	0.99976	0.00315174	0	0	1	0	0	0.1	0	Random Only
'ARTFR212'	1	1	1	1	0.99976	0.00315174	0	0	1	0	0	0.1	0	Random Only
'ARTFR213'	1	1	1	1	0.99976	0.00315174	0	0	1	0	0	0.1	0	Random Only
'ARTFR31'	0.99318	0.0566599	1	1	0.99976	0.00315174	3	0	1	1.43541	0	0.1	0	Random Only
'ARTFR32'	0.992999	0.0581568	1	1	0.99976	0.00315174	3	0	1	1.43541	0	0.1	0	Random Only
'ARTFR33'	0.993015	0.0580232	1	1	0.99976	0.00315174	3	0	1	1.43541	0	0.1	0	Random Only
'ARTFR34'	0.992944	0.0586082	1	1	0.99976	0.00315174	3	0	1	1.43541	0	0.1	0	Random Only
'ARTFR41'	0.992823	0.0596155	1	1	0.99976	0.00315174	3	0	1	1.43541	0	0.1	0	Random Only
'ARTFR42'	0.992999	0.0581568	1	1	0.99976	0.00315174	3	0	1	1.43541	0	0.1	0	Random Only
'ARTFR43'	0.993015	0.0580232	1	1	0.99976	0.00315174	3	0	1	1.43541	0	0.1	0	Random Only
'ARTFR44'	0.992944	0.0586082	1	1	0.99976	0.00315174	3	0	1	1.43541	0	0.1	0	Random Only
'ARTFR45'	1	1	1	1	0.99976	0.00315174	0	0	1	0	0	0.1	0	Random Only
'ARTFR46'	0.993015	0.0580232	1	1	0.99976	0.00315174	3	0	1	1.43541	0	0.1	0	Random Only
'ARTFR61'	0.992823	0.0596155	1	1	0.99976	0.00315174	3	0	1	1.43541	0	0.1	0	Random Only
'ARTPLM1'	0.993338	0.0553403	1	1	0.99976	0.00315174	3	0	1	1.43541	0	0.1	0	Random Only
'ARTPLM1m'	0.991486	0.0599601	1	1	0.99976	0.00315174	3	0	1	1.43541	0	0.1	0	Random Only
'ARTPLM2'	0.993316	0.0555701	1	1	0.99976	0.00315174	3	0	1	1.43541	0	0.1	0	Random Only
'ARTPLM2m'	0.991486	0.0599601	1	1	0.99976	0.00315174	3	0	1	1.43541	0	0.1	0	Random Only
'ARTPLM3'	0.993316	0.0555701	1	1	0.99976	0.00315174	3	0	1	1.43541	0	0.1	0	Random Only
'ARTPLM3m'	0.991486	0.0599601	1	1	0.99976	0.00315174	3	0	1	1.43541	0	0.1	0	Random Only
'ASAH1'	0.992875	0.0591821	1	1	0.999404	0.00516113	3	0	6	1.43541	0	0.6	0	Random Only
'ASCBOX'	0.992823	0.0596155	1	1	0.99976	0.00315174	3	0	1	1.43541	0	0.1	0	Random Only
'ASCBt'	1	1	1	1	0.99976	0.00315174	0	0	1	0	0	0.1	0	Random Only
'ASCBt4'	1	1	1	1	0.99976	0.00315174	0	0	1	0	0	0.1	0	Random Only
'ASNALANaEx'	1	1	1	1	0.99976	0.00315174	0	0	1	0	0	0.1	0	Random Only
'ASNCYSNaEx'	1	1	1	1	0.99976	0.00315174	0	0	1	0	0	0.1	0	Random Only
'ASNGLNNaEx'	1	1	1	1	0.99976	0.00315174	0	0	1	0	0	0.1	0	Random Only
'ASNNm'	0.992986	0.0582577	1	1	0.99976	0.00315174	3	0	1	1.43541	0	0.1	0	Random Only
'ASNS1'	0.986502	0.0636148	1	1	0.996384	0.0136943	15	0	24	7.17703	0	2.4	0	Random Only
'ASNSERNaEx'	1	1	1	1	0.99976	0.00315174	0	0	1	0	0	0.1	0	Random Only
'ASNTHRNaEx'	1	1	1	1	0.99976	0.00315174	0	0	1	0	0	0.1	0	Random Only
'ASNt4'	1	1	1	1	0.99976	0.00315174	0	0	1	0	0	0.1	0	Random Only
'ASNtN1'	1	1	1	1	0.99976	0.00315174	0	0	1	0	0	0.1	0	Random Only
'ASNtm'	0.992986	0.0582577	1	1	0.99976	0.00315174	3	0	1	1.43541	0	0.1	0	Random Only
'ASPCTr'	0.691981	0.0373768	0.703731	0.00090168	0.746236	0.0695082	209	6000	993	100	100	99.3	1	Both
'ASPDt6'	1	1	1	1	0.99976	0.00315174	0	0	1	0	0	0.1	0	Random Only
'ASPDxt'	1	1	1	1	0.99976	0.00315174	0	0	1	0	0	0.1	0	Random Only
'ASPGLUm'	0.992823	0.0596155	1	1	0.99976	0.00315174	3	0	1	1.43541	0	0.1	0	Random Only
'ASPTA'	0.992823	0.0596155	1	1	0.99976	0.00315174	3	0	1	1.43541	0	0.1	0	Random Only
'ASPTAm'	0.992823	0.0596155	1	1	0.99976	0.00315174	3	0	1	1.43541	0	0.1	0	Random Only
'ASPt6'	1	1	1	1	0.99976	0.00315174	0	0	1	0	0	0.1	0	Random Only
'ATP1ter'	1	1	1	1	0.99976	0.00315174	0	0	1	0	0	0.1	0	Random Only
'ATP2ter'	1	1	1	1	0.99976	0.00315174	0	0	1	0	0	0.1	0	Random Only
'ATPH1e'	1	1	1	1	0.99976	0.00315174	0	0	1	0	0	0.1	0	Random Only
'ATPH2e'	1	1	1	1	0.99976	0.00315174	0	0	1	0	0	0.1	0	Random Only
'ATPS4m'	0.992823	0.0596155	1	1	0.99976	0.00315174	3	0	1	1.43541	0	0.1	0	Random Only
'ATPasel'	0.992823	0.0596155	1	1	0.99976	0.00315174	3	0	1	1.43541	0	0.1	0	Random Only
'ATPtm'	1	1	1	1	0.99976	0.00315174	0	0	1	0	0	0.1	0	Random Only
'ATPtn'	0.992823	0.0596155	1	1	0.99976	0.00315174	3	0	1	1.43541	0	0.1	0	Random Only
'ATPtx'	0.99314	0.0569797	1	1	0.99976	0.00315174	3	0	1	1.43541	0	0.1	0	Random Only
'AVITE1t'	1	1	1	1	0.99976	0.00315174	0	0	1	0	0	0.1	0	Random Only
'AVITE2t'	1	1	1	1	0.99976	0.00315174	0	0	1	0	0	0.1	0	Random Only
'A_MANASE'	1	1	1	1	0.99976	0.00315174	0	0	1	0	0	0.1	0	Random Only
'A_MANASEly'	0.992823	0.0596155	1	1	0.99976	0.00315174	3	0	1	1.43541	0	0.1	0	Random Only
'Asn-X-Ser/Thrtr'	0.992823	0.0596155	1	1	0.99976	0.00315174	3	0	1	1.43541	0	0.1	0	Random Only
'B3GALT3g'	1	1	1	1	0.99976	0.00315174	0	0	1	0	0	0.1	0	Random Only
'B3GALT41g'	1	1	1	1	0.99976	0.00315174	0	0	1	0	0	0.1	0	Random Only
'B3GALT42g'	1	1	1	1	0.99976	0.00315174	0	0	1	0	0	0.1	0	Random Only
'B3GALT43g'	1	1	1	1	0.99976	0.00315174	0	0	1	0	0	0.1	0	Random Only
'B3GALT44g'	1	1	1	1	0.99976	0.00315174	0	0	1	0	0	0.1	0	Random Only
'B3GNT11g'	1	1	1	1	0.99976	0.00315174	0	0	1	0	0	0.1	0	Random Only
'B3GNT12g'	1	1	1	1	0.99976	0.00315174	0	0	1	0	0	0.1	0	Random Only
'B3GNT51g'	1	1	1	1	0.99976	0.00315174	0	0	1	0	0	0.1	0	Random Only
'BALAVECSEC'	1	1	1	1	0.99976	0.00315174	0	0	1	0	0	0.1	0	Random Only
'BALAtmr'	1	1	1	1	0.99976	0.00315174	0	0	1	0	0	0.1	0	Random Only
'BAMPPALDOX'	1	1	1	1	0.99976	0.00315174	0	0	1	0	0	0.1	0	Random Only
'BAMPPALDOXm'	1	1	1	1	0.99976	0.00315174	0	0	1	0	0	0.1	0	Random Only
'BBHOX'	1	1	1	1	0.99976	0.00315174	0	0	1	0	0	0.1	0	Random Only
'BDHm'	0.993208	0.0566034	1	1	0.99976	0.00315174	3	0	1	1.43541	0	0.1	0	Random Only
'BDMT_L'	0.992823	0.0596155	1	1	0.99976	0.00315174	3	0	1	1.43541	0	0.1	0	Random Only
'BDMT_U'	0.992823	0.0596155	1	1	0.99976	0.00315174	3	0	1	1.43541	0	0.1	0	Random Only
'BETALDHx'	1	1	1	1	0.99976	0.00315174	0	0	1	0	0	0.1	0	Random Only
'BETALDHxm'	0.992837	0.0594966	1	1	0.999507	0.0043532	3	0	1	1.43541	0	0.1	0	Random Only
'BHBt'	0.993208	0.0566034	1	1	0.99976	0.00315174	3	0	1	1.43541	0	0.1	0	Random Only
'BHBtm'	0.993208	0.0566034	1	1	0.99976	0.00315174	3	0	1	1.43541	0	0.1	0	Random Only
'BILDGLCURt'	0.992823	0.0596155	1	1	0.99976	0.00315174	3	0	1	1.43541	0	0.1	0	Random Only
'BILDGLCURte'	0.992823	0.0596155	1	1	0.99976	0.00315174	3	0	1	1.43541	0	0.1	0	Random Only
'BILDGLCURtr'	1	1	1	1	0.99976	0.00315174	0	0	1	0	0	0.1	0	Random Only
'BILGLCURt'	0.992823	0.0596155	1	1	0.99976	0.00315174	3	0	1	1.43541	0	0.1	0	Random Only
'BILGLCURte'	0.992823	0.0596155	1	1	0.99976	0.00315174	3	0	1	1.43541	0	0.1	0	Random Only
'BILGLCURtr'	1	1	1	1	0.99976	0.00315174	0	0	1	0	0	0.1	0	Random Only
'BILIRED'	1	1	1	1	0.99976	0.00315174	0	0	1	0	0	0.1	0	Random Only
'BILIRUBt2'	1	1	1	1	0.99976	0.00315174	0	0	1	0	0	0.1	0	Random Only
'BILIRUBtr'	1	1	1	1	0.99976	0.00315174	0	0	1	0	0	0.1	0	Random Only
'BIOCYTtn'	1	1	1	1	0.99976	0.00315174	0	0	1	0	0	0.1	0	Random Only
'BMTer_L'	1	1	1	1	0.99976	0.00315174	0	0	1	0	0	0.1	0	Random Only
'BMTer_U'	1	1	1	1	0.99976	0.00315174	0	0	1	0	0	0.1	0	Random Only
'BPNT'	0.992823	0.0596155	1	1	0.99976	0.00315174	3	0	1	1.43541	0	0.1	0	Random Only
'BPNT2'	0.992823	0.0596155	1	1	0.99976	0.00315174	3	0	1	1.43541	0	0.1	0	Random Only
'BTND1'	1	1	1	1	0.99976	0.00315174	0	0	1	0	0	0.1	0	Random Only
'BTND1n'	1	1	1	1	0.99976	0.00315174	0	0	1	0	0	0.1	0	Random Only
'BTNDe'	1	1	1	1	0.99976	0.00315174	0	0	1	0	0	0.1	0	Random Only
'BTNDm'	1	1	1	1	0.99976	0.00315174	0	0	1	0	0	0.1	0	Random Only
'BTNPL'	1	1	1	1	0.99976	0.00315174	0	0	1	0	0	0.1	0	Random Only
'BTNPLm'	1	1	1	1	0.99976	0.00315174	0	0	1	0	0	0.1	0	Random Only
'BTNt2'	1	1	1	1	0.99976	0.00315174	0	0	1	0	0	0.1	0	Random Only
'BTNt2m'	1	1	1	1	0.99976	0.00315174	0	0	1	0	0	0.1	0	Random Only
'BTNt3i'	0.992823	0.0596155	1	1	0.99976	0.00315174	3	0	1	1.43541	0	0.1	0	Random Only
'BTNt4i'	1	1	1	1	0.99976	0.00315174	0	0	1	0	0	0.1	0	Random Only
'BTNtn'	1	1	1	1	0.99976	0.00315174	0	0	1	0	0	0.1	0	Random Only
'BUTt2m'	1	1	1	1	0.99976	0.00315174	0	0	1	0	0	0.1	0	Random Only
'BUTt2r'	1	1	1	1	0.99976	0.00315174	0	0	1	0	0	0.1	0	Random Only
'BVITEt'	1	1	1	1	0.99976	0.00315174	0	0	1	0	0	0.1	0	Random Only
'BZt'	1	1	1	1	0.99976	0.00315174	0	0	1	0	0	0.1	0	Random Only
'BZtr'	1	1	1	1	0.99976	0.00315174	0	0	1	0	0	0.1	0	Random Only
'B_MANNASEly'	0.992823	0.0596155	1	1	0.99976	0.00315174	3	0	1	1.43541	0	0.1	0	Random Only
'C14STRr'	0.99314	0.0569797	1	1	0.99976	0.00315174	3	0	1	1.43541	0	0.1	0	Random Only
'C160CPT1'	1	1	1	1	0.99976	0.00315174	0	0	1	0	0	0.1	0	Random Only
'C160CPT2'	1	1	1	1	0.99976	0.00315174	0	0	1	0	0	0.1	0	Random Only
'C160CRNt'	1	1	1	1	0.99976	0.00315174	0	0	1	0	0	0.1	0	Random Only
'C161CPT1'	1	1	1	1	0.99976	0.00315174	0	0	1	0	0	0.1	0	Random Only
'C161CPT12'	1	1	1	1	0.99976	0.00315174	0	0	1	0	0	0.1	0	Random Only
'C161CPT2'	1	1	1	1	0.99976	0.00315174	0	0	1	0	0	0.1	0	Random Only
'C161CPT22'	1	1	1	1	0.99976	0.00315174	0	0	1	0	0	0.1	0	Random Only
'C161CRN2t'	1	1	1	1	0.99976	0.00315174	0	0	1	0	0	0.1	0	Random Only
'C161CRNt'	1	1	1	1	0.99976	0.00315174	0	0	1	0	0	0.1	0	Random Only
'C180CPT1'	0.991486	0.0599601	1	1	0.99976	0.00315174	3	0	1	1.43541	0	0.1	0	Random Only
'C180CPT2'	0.991486	0.0599601	1	1	0.99976	0.00315174	3	0	1	1.43541	0	0.1	0	Random Only
'C180CRNt'	0.991486	0.0599601	1	1	0.99976	0.00315174	3	0	1	1.43541	0	0.1	0	Random Only
'C181CPT1'	0.991541	0.0599452	1	1	0.99976	0.00315174	3	0	1	1.43541	0	0.1	0	Random Only
'C181CPT2'	0.991541	0.0599452	1	1	0.99976	0.00315174	3	0	1	1.43541	0	0.1	0	Random Only
'C181CRNt'	0.991541	0.0599452	1	1	0.99976	0.00315174	3	0	1	1.43541	0	0.1	0	Random Only
'C204CPT1'	1	1	1	1	0.99976	0.00315174	0	0	1	0	0	0.1	0	Random Only
'C204CPT2'	1	1	1	1	0.99976	0.00315174	0	0	1	0	0	0.1	0	Random Only
'C204CRNt'	1	1	1	1	0.99976	0.00315174	0	0	1	0	0	0.1	0	Random Only
'C226COAtx'	1	1	1	1	0.99976	0.00315174	0	0	1	0	0	0.1	0	Random Only
'C226CPT1'	1	1	1	1	0.99976	0.00315174	0	0	1	0	0	0.1	0	Random Only
'C226CPT2'	1	1	1	1	0.99976	0.00315174	0	0	1	0	0	0.1	0	Random Only
'C226CRNt'	1	1	1	1	0.99976	0.00315174	0	0	1	0	0	0.1	0	Random Only
'C2M26DCOAHLm'	1	1	1	1	0.99976	0.00315174	0	0	1	0	0	0.1	0	Random Only
'C2M26DCOAHLx'	1	1	1	1	0.99976	0.00315174	0	0	1	0	0	0.1	0	Random Only
'C3STDH1Pr'	0.99314	0.0569797	1	1	0.99976	0.00315174	3	0	1	1.43541	0	0.1	0	Random Only
'C3STDH1r'	0.99314	0.0569797	1	1	0.99976	0.00315174	3	0	1	1.43541	0	0.1	0	Random Only
'C3STKR2r'	0.99314	0.0569797	1	1	0.99976	0.00315174	3	0	1	1.43541	0	0.1	0	Random Only
'C4STMO1r'	0.99314	0.0569797	1	1	0.99976	0.00315174	3	0	1	1.43541	0	0.1	0	Random Only
'C4STMO2Pr'	0.99314	0.0569797	1	1	0.99976	0.00315174	3	0	1	1.43541	0	0.1	0	Random Only
'C4STMO2r'	0.99314	0.0569797	1	1	0.99976	0.00315174	3	0	1	1.43541	0	0.1	0	Random Only
'CAATPS'	0.992823	0.0596155	1	1	0.99976	0.00315174	3	0	1	1.43541	0	0.1	0	Random Only
'CAMPt'	0.979208	0.069581	1	1	0.99402	0.0216394	30	0	40	14.3541	0	4	0	Random Only
'CAT2p'	1	1	1	1	0.99976	0.00315174	0	0	1	0	0	0.1	0	Random Only
'CATm'	0.992823	0.0596155	1	1	0.99976	0.00315174	3	0	1	1.43541	0	0.1	0	Random Only
'CATp'	0.992823	0.0596155	1	1	0.99976	0.00315174	3	0	1	1.43541	0	0.1	0	Random Only
'CAt7r'	1	1	1	1	0.99976	0.00315174	0	0	1	0	0	0.1	0	Random Only
'CBL2OR'	1	1	1	1	0.99976	0.00315174	0	0	1	0	0	0.1	0	Random Only
'CBL2tm'	1	1	1	1	0.99976	0.00315174	0	0	1	0	0	0.1	0	Random Only
'CBLATm'	1	1	1	1	0.99976	0.00315174	0	0	1	0	0	0.1	0	Random Only
'CBPPer'	1	1	1	1	0.99976	0.00315174	0	0	1	0	0	0.1	0	Random Only
'CBPS'	0.691981	0.0373768	0.703731	0.00090168	0.746236	0.0695082	209	6000	993	100	100	99.3	1	Both
'CBPSam'	0.979208	0.069581	1	1	0.99386	0.0218779	30	0	41	14.3541	0	4.1	0	Random Only
'CBPter'	1	1	1	1	0.99976	0.00315174	0	0	1	0	0	0.1	0	Random Only
'CBR1'	1	1	1	1	0.99976	0.00315174	0	0	1	0	0	0.1	0	Random Only
'CBR2'	1	1	1	1	0.99976	0.00315174	0	0	1	0	0	0.1	0	Random Only
'CCA_D3t'	1	1	1	1	0.99976	0.00315174	0	0	1	0	0	0.1	0	Random Only
'CDIPTr'	0.992823	0.0596155	1	1	0.99976	0.00315174	3	0	1	1.43541	0	0.1	0	Random Only
'CDPDAGtm'	0.992849	0.0592014	1	1	0.999602	0.00376327	3	0	1	1.43541	0	0.1	0	Random Only
'CDS'	0.992823	0.0596155	1	1	0.99976	0.00315174	3	0	1	1.43541	0	0.1	0	Random Only
'CDSm'	0.992849	0.0592014	1	1	0.999602	0.00376327	3	0	1	1.43541	0	0.1	0	Random Only
'CEPTC'	0.992823	0.0596155	1	1	0.99976	0.00315174	3	0	1	1.43541	0	0.1	0	Random Only
'CEPTE'	0.992823	0.0596155	1	1	0.99976	0.00315174	3	0	1	1.43541	0	0.1	0	Random Only
'CERK'	0.994706	0.044898	1	1	0.999007	0.00827059	3	0	9	1.43541	0	0.9	0	Random Only
'CERT1gt'	0.992823	0.0596155	1	1	0.99976	0.00315174	3	0	1	1.43541	0	0.1	0	Random Only
'CERT1rt'	0.992823	0.0596155	1	1	0.99976	0.00315174	3	0	1	1.43541	0	0.1	0	Random Only
'CERT2gt'	1	1	1	1	0.99976	0.00315174	0	0	1	0	0	0.1	0	Random Only
'CERT2rt'	0.992823	0.0596155	1	1	0.99976	0.00315174	3	0	1	1.43541	0	0.1	0	Random Only
'CGLYt3(2)'	0.992823	0.0596155	1	1	0.99976	0.00315174	3	0	1	1.43541	0	0.1	0	Random Only
'CGMPt'	0.979208	0.069581	1	1	0.995142	0.0198286	30	0	32	14.3541	0	3.2	0	Random Only
'CHLP'	0.992823	0.0596155	1	1	0.99976	0.00315174	3	0	1	1.43541	0	0.1	0	Random Only
'CHLPCTD'	0.992823	0.0596155	1	1	0.99976	0.00315174	3	0	1	1.43541	0	0.1	0	Random Only
'CHLtm'	0.992814	0.0594942	1	1	0.999507	0.0043532	3	0	1	1.43541	0	0.1	0	Random Only
'CHOLATEt'	1	1	1	1	0.99976	0.00315174	0	0	1	0	0	0.1	0	Random Only
'CHOLATEt2'	1	1	1	1	0.99976	0.00315174	0	0	1	0	0	0.1	0	Random Only
'CHOLD2m'	0.992837	0.0594966	1	1	0.999507	0.0043532	3	0	1	1.43541	0	0.1	0	Random Only
'CHOLK'	0.992823	0.0596155	1	1	0.99976	0.00315174	3	0	1	1.43541	0	0.1	0	Random Only
'CHOLPtg'	0.992823	0.0596155	1	1	0.99976	0.00315174	3	0	1	1.43541	0	0.1	0	Random Only
'CHOLPtl'	0.992875	0.0591821	1	1	0.999404	0.00516113	3	0	6	1.43541	0	0.6	0	Random Only
'CHOLt4'	1	1	1	1	0.99976	0.00315174	0	0	1	0	0	0.1	0	Random Only
'CHOLtg'	0.992823	0.0596155	1	1	0.99976	0.00315174	3	0	1	1.43541	0	0.1	0	Random Only
'CHOLtn'	1	1	1	1	0.99976	0.00315174	0	0	1	0	0	0.1	0	Random Only
'CHOLtr'	0.992823	0.0596155	1	1	0.99976	0.00315174	3	0	1	1.43541	0	0.1	0	Random Only
'CHOLtu'	1	1	1	1	0.99976	0.00315174	0	0	1	0	0	0.1	0	Random Only
'CHSTEROLSULT'	0.992823	0.0596155	1	1	0.99976	0.00315174	3	0	1	1.43541	0	0.1	0	Random Only
'CHSTEROLt'	0.993137	0.0570042	1	1	0.99976	0.00315174	3	0	1	1.43541	0	0.1	0	Random Only
'CHSTEROLt1'	1	1	1	1	0.99976	0.00315174	0	0	1	0	0	0.1	0	Random Only
'CHSTEROLt2'	0.993137	0.0570042	1	1	0.99976	0.00315174	3	0	1	1.43541	0	0.1	0	Random Only
'CHSTEROLt3'	0.993137	0.0570042	1	1	0.99976	0.00315174	3	0	1	1.43541	0	0.1	0	Random Only
'CHSTEROLtg'	1	1	1	1	0.99976	0.00315174	0	0	1	0	0	0.1	0	Random Only
'CHTNASE'	1	1	1	1	0.99976	0.00315174	0	0	1	0	0	0.1	0	Random Only
'CHTNASEe'	1	1	1	1	0.99976	0.00315174	0	0	1	0	0	0.1	0	Random Only
'CITL'	0.992823	0.0596155	1	1	0.99976	0.00315174	3	0	1	1.43541	0	0.1	0	Random Only
'CITRtm'	1	1	1	1	0.99976	0.00315174	0	0	1	0	0	0.1	0	Random Only
'CITt4_2'	1	1	1	1	0.99976	0.00315174	0	0	1	0	0	0.1	0	Random Only
'CITt4_4'	1	1	1	1	0.99976	0.00315174	0	0	1	0	0	0.1	0	Random Only
'CITtam'	0.993395	0.0548674	1	1	0.99976	0.00315174	3	0	1	1.43541	0	0.1	0	Random Only
'CITtbm'	0.989735	0.0610552	1	1	0.999725	0.00320194	9	0	1	4.30622	0	0.1	0	Random Only
'CK'	1	1	1	1	0.99976	0.00315174	0	0	1	0	0	0.1	0	Random Only
'CKc'	1	1	1	1	0.99976	0.00315174	0	0	1	0	0	0.1	0	Random Only
'CLFORtex'	0.99307	0.0575618	1	1	0.99976	0.00315174	3	0	1	1.43541	0	0.1	0	Random Only
'CLFORtex2'	0.99307	0.0575618	1	1	0.99976	0.00315174	3	0	1	1.43541	0	0.1	0	Random Only
'CLHCO3tex2'	1	1	1	1	0.99976	0.00315174	0	0	1	0	0	0.1	0	Random Only
'CLHCOtex'	1	1	1	1	0.99976	0.00315174	0	0	1	0	0	0.1	0	Random Only
'CLI2tex'	1	1	1	1	0.99976	0.00315174	0	0	1	0	0	0.1	0	Random Only
'CLOHtex2'	1	1	1	1	0.99976	0.00315174	0	0	1	0	0	0.1	0	Random Only
'CLOXAtex2'	1	1	1	1	0.99976	0.00315174	0	0	1	0	0	0.1	0	Random Only
'CLPNDCOAtx'	1	1	1	1	0.99976	0.00315174	0	0	1	0	0	0.1	0	Random Only
'CLPNDCPT1'	1	1	1	1	0.99976	0.00315174	0	0	1	0	0	0.1	0	Random Only
'CLPNDCPT2'	1	1	1	1	0.99976	0.00315174	0	0	1	0	0	0.1	0	Random Only
'CLPNDCRNt'	1	1	1	1	0.99976	0.00315174	0	0	1	0	0	0.1	0	Random Only
'CLPNDt'	1	1	1	1	0.99976	0.00315174	0	0	1	0	0	0.1	0	Random Only
'CLS_hs'	1	1	1	1	0.99976	0.00315174	0	0	1	0	0	0.1	0	Random Only
'CMPACNAtg'	0.992845	0.0594299	1	1	0.99976	0.00315174	3	0	1	1.43541	0	0.1	0	Random Only
'CMPACNAtn'	0.992846	0.0594263	1	1	0.99976	0.00315174	3	0	1	1.43541	0	0.1	0	Random Only
'CMPSAS'	0.992845	0.0594299	1	1	0.99976	0.00315174	3	0	1	1.43541	0	0.1	0	Random Only
'CMPSASn'	0.992846	0.0594263	1	1	0.99976	0.00315174	3	0	1	1.43541	0	0.1	0	Random Only
'CO2t'	0.993011	0.0578087	1	1	0.99976	0.00315174	3	0	1	1.43541	0	0.1	0	Random Only
'CO2ter'	0.99314	0.0569797	1	1	0.99976	0.00315174	3	0	1	1.43541	0	0.1	0	Random Only
'CO2tg'	1	1	1	1	0.99976	0.00315174	0	0	1	0	0	0.1	0	Random Only
'CO2tm'	0.99283	0.0595336	1	1	0.99976	0.00315174	3	0	1	1.43541	0	0.1	0	Random Only
'CO2tn'	1	1	1	1	0.99976	0.00315174	0	0	1	0	0	0.1	0	Random Only
'CO2tp'	0.99314	0.0569797	1	1	0.99976	0.00315174	3	0	1	1.43541	0	0.1	0	Random Only
'COAtg'	1	1	1	1	0.99976	0.00315174	0	0	1	0	0	0.1	0	Random Only
'COAtl'	1	1	1	1	0.99976	0.00315174	0	0	1	0	0	0.1	0	Random Only
'COAtm'	0.992823	0.0596155	1	1	0.99976	0.00315174	3	0	1	1.43541	0	0.1	0	Random Only
'COAtn'	1	1	1	1	0.99976	0.00315174	0	0	1	0	0	0.1	0	Random Only
'COAtp'	0.993606	0.0531146	1	1	0.99976	0.00315174	3	0	1	1.43541	0	0.1	0	Random Only
'COAtr'	1	1	1	1	0.99976	0.00315174	0	0	1	0	0	0.1	0	Random Only
'COKECBESr'	1	1	1	1	0.99976	0.00315174	0	0	1	0	0	0.1	0	Random Only
'COQ3m'	1	1	1	1	0.99976	0.00315174	0	0	1	0	0	0.1	0	Random Only
'COQ5m'	1	1	1	1	0.99976	0.00315174	0	0	1	0	0	0.1	0	Random Only
'COQ6m'	1	1	1	1	0.99976	0.00315174	0	0	1	0	0	0.1	0	Random Only
'COQ7m'	1	1	1	1	0.99976	0.00315174	0	0	1	0	0	0.1	0	Random Only
'CORE2GTg'	0.992845	0.0594299	1	1	0.99976	0.00315174	3	0	1	1.43541	0	0.1	0	Random Only
'CORE6GTg'	1	1	1	1	0.99976	0.00315174	0	0	1	0	0	0.1	0	Random Only
'COUCOAFm'	1	1	1	1	0.99976	0.00315174	0	0	1	0	0	0.1	0	Random Only
'COUMARINte'	1	1	1	1	0.99976	0.00315174	0	0	1	0	0	0.1	0	Random Only
'COt'	1	1	1	1	0.99976	0.00315174	0	0	1	0	0	0.1	0	Random Only
'CPCTDTX'	1	1	1	1	0.99976	0.00315174	0	0	1	0	0	0.1	0	Random Only
'CPPPGO'	1	1	1	1	0.99976	0.00315174	0	0	1	0	0	0.1	0	Random Only
'CREATt4(2)r'	0.980379	0.0684882	1	1	0.99592	0.0160454	30	0	25	14.3541	0	2.5	0	Random Only
'CREATtmdiffir'	1	1	1	1	0.99976	0.00315174	0	0	1	0	0	0.1	0	Random Only
'CRMPte'	0.994706	0.044898	1	1	0.999007	0.00827059	3	0	9	1.43541	0	0.9	0	Random Only
'CRNCAR3tp'	1	1	1	1	0.99976	0.00315174	0	0	1	0	0	0.1	0	Random Only
'CRNCARtp'	0.993606	0.0531146	1	1	0.99976	0.00315174	3	0	1	1.43541	0	0.1	0	Random Only
'CRNt'	1	1	1	1	0.99976	0.00315174	0	0	1	0	0	0.1	0	Random Only
'CRNtHa'	1	1	1	1	0.99976	0.00315174	0	0	1	0	0	0.1	0	Random Only
'CRNtim'	0.992823	0.0596155	1	1	0.99976	0.00315174	3	0	1	1.43541	0	0.1	0	Random Only
'CRNtuIR'	1	1	1	1	0.99976	0.00315174	0	0	1	0	0	0.1	0	Random Only
'CRNtuNa'	1	1	1	1	0.99976	0.00315174	0	0	1	0	0	0.1	0	Random Only
'CRNtx'	1	1	1	1	0.99976	0.00315174	0	0	1	0	0	0.1	0	Random Only
'CRTSLt'	1	1	1	1	0.99976	0.00315174	0	0	1	0	0	0.1	0	Random Only
'CRTSLtm'	1	1	1	1	0.99976	0.00315174	0	0	1	0	0	0.1	0	Random Only
'CRTSLtr'	1	1	1	1	0.99976	0.00315174	0	0	1	0	0	0.1	0	Random Only
'CRTSTRNt'	1	1	1	1	0.99976	0.00315174	0	0	1	0	0	0.1	0	Random Only
'CRTSTRNtm'	1	1	1	1	0.99976	0.00315174	0	0	1	0	0	0.1	0	Random Only
'CRTSTRNtr'	1	1	1	1	0.99976	0.00315174	0	0	1	0	0	0.1	0	Random Only
'CRVNCtr'	1	1	1	1	0.99976	0.00315174	0	0	1	0	0	0.1	0	Random Only
'CSNAT'	1	1	1	1	0.99976	0.00315174	0	0	1	0	0	0.1	0	Random Only
'CSNAT2m'	1	1	1	1	0.99976	0.00315174	0	0	1	0	0	0.1	0	Random Only
'CSNAT2x'	1	1	1	1	0.99976	0.00315174	0	0	1	0	0	0.1	0	Random Only
'CSNAT3x'	1	1	1	1	0.99976	0.00315174	0	0	1	0	0	0.1	0	Random Only
'CSNATer'	1	1	1	1	0.99976	0.00315174	0	0	1	0	0	0.1	0	Random Only
'CSNATm'	0.992823	0.0596155	1	1	0.99976	0.00315174	3	0	1	1.43541	0	0.1	0	Random Only
'CSNATp'	0.993606	0.0531146	1	1	0.99976	0.00315174	3	0	1	1.43541	0	0.1	0	Random Only
'CSNATr'	0.992823	0.0596155	1	1	0.99976	0.00315174	3	0	1	1.43541	0	0.1	0	Random Only
'CSNt'	1	1	1	1	0.99976	0.00315174	0	0	1	0	0	0.1	0	Random Only
'CSPG_At'	1	1	1	1	0.99976	0.00315174	0	0	1	0	0	0.1	0	Random Only
'CSPG_Atly'	1	1	1	1	0.99976	0.00315174	0	0	1	0	0	0.1	0	Random Only
'CSPG_Bt'	1	1	1	1	0.99976	0.00315174	0	0	1	0	0	0.1	0	Random Only
'CSPG_Btly'	1	1	1	1	0.99976	0.00315174	0	0	1	0	0	0.1	0	Random Only
'CSPG_Ct'	1	1	1	1	0.99976	0.00315174	0	0	1	0	0	0.1	0	Random Only
'CSPG_Ctly'	1	1	1	1	0.99976	0.00315174	0	0	1	0	0	0.1	0	Random Only
'CSPG_Dt'	1	1	1	1	0.99976	0.00315174	0	0	1	0	0	0.1	0	Random Only
'CSPG_Dtly'	1	1	1	1	0.99976	0.00315174	0	0	1	0	0	0.1	0	Random Only
'CSPG_Et'	1	1	1	1	0.99976	0.00315174	0	0	1	0	0	0.1	0	Random Only
'CSPG_Etly'	1	1	1	1	0.99976	0.00315174	0	0	1	0	0	0.1	0	Random Only
'CSm'	0.992823	0.0596155	1	1	0.99976	0.00315174	3	0	1	1.43541	0	0.1	0	Random Only
'CTPS1'	0.648165	0.0319154	0.650941	0.00370667	0.664681	0.110153	209	6000	984	100	100	98.4	1	Both
'CTPS2'	1	1	1	1	0.99976	0.00315174	0	0	1	0	0	0.1	0	Random Only
'CTPtn'	0.992846	0.0594263	1	1	0.99976	0.00315174	3	0	1	1.43541	0	0.1	0	Random Only
'CYANSTm'	1	1	1	1	0.99976	0.00315174	0	0	1	0	0	0.1	0	Random Only
'CYANt'	1	1	1	1	0.99976	0.00315174	0	0	1	0	0	0.1	0	Random Only
'CYANtm'	1	1	1	1	0.99976	0.00315174	0	0	1	0	0	0.1	0	Random Only
'CYOOm2'	0.992823	0.0596155	1	1	0.99976	0.00315174	3	0	1	1.43541	0	0.1	0	Random Only
'CYOOm3'	1	1	1	1	0.99976	0.00315174	0	0	1	0	0	0.1	0	Random Only
'CYOR-u10m'	0.923385	0.143843	1	1	0.99976	0.00315174	48	0	1	22.9665	0	0.1	0	Random Only
'CYSALANaEx'	1	1	1	1	0.99976	0.00315174	0	0	1	0	0	0.1	0	Random Only
'CYSAMO'	0.915677	0.0761058	0.927523	0.00304404	0.860708	0.0291786	173	5998	986	82.7751	99.9667	98.6	0	Both
'CYSASNNaEx'	1	1	1	1	0.99976	0.00315174	0	0	1	0	0	0.1	0	Random Only
'CYSGLNNaEx'	1	1	1	1	0.99976	0.00315174	0	0	1	0	0	0.1	0	Random Only
'CYSGLUexR'	1	1	1	1	0.99976	0.00315174	0	0	1	0	0	0.1	0	Random Only
'CYSGLYex'	1	1	1	1	0.99976	0.00315174	0	0	1	0	0	0.1	0	Random Only
'CYSGLYexR'	1	1	1	1	0.99976	0.00315174	0	0	1	0	0	0.1	0	Random Only
'CYSSERNaEx'	1	1	1	1	0.99976	0.00315174	0	0	1	0	0	0.1	0	Random Only
'CYSTA'	0.913308	0.0750858	0.927523	0.00304404	0.860654	0.0290957	178	5998	986	85.1675	99.9667	98.6	0	Both
'CYSTAm'	1	1	1	1	0.99976	0.00315174	0	0	1	0	0	0.1	0	Random Only
'CYSTGL'	0.807318	0.0668011	0.811658	0.00250357	0.808816	0.032983	201	6000	998	96.1722	100	99.8	1	Both
'CYSTGLUex'	1	1	1	1	0.99976	0.00315174	0	0	1	0	0	0.1	0	Random Only
'CYSTHRNaEx'	1	1	1	1	0.99976	0.00315174	0	0	1	0	0	0.1	0	Random Only
'CYSTS'	0.807318	0.0668011	0.811658	0.00250357	0.808816	0.032983	201	6000	998	96.1722	100	99.8	1	Both
'CYSTSERex'	1	1	1	1	0.99976	0.00315174	0	0	1	0	0	0.1	0	Random Only
'CYSt4'	1	1	1	1	0.99976	0.00315174	0	0	1	0	0	0.1	0	Random Only
'CYStec'	1	1	1	1	0.99976	0.00315174	0	0	1	0	0	0.1	0	Random Only
'CYTD'	0.992823	0.0596155	1	1	0.99976	0.00315174	3	0	1	1.43541	0	0.1	0	Random Only
'CYTDK1'	0.992823	0.0596155	1	1	0.99976	0.00315174	3	0	1	1.43541	0	0.1	0	Random Only
'CYTDK2m'	0.992849	0.0592014	1	1	0.999602	0.00376327	3	0	1	1.43541	0	0.1	0	Random Only
'CYTDn'	0.992823	0.0596155	1	1	0.99976	0.00315174	3	0	1	1.43541	0	0.1	0	Random Only
'CYTDt'	1	1	1	1	0.99976	0.00315174	0	0	1	0	0	0.1	0	Random Only
'CYTDt4'	1	1	1	1	0.99976	0.00315174	0	0	1	0	0	0.1	0	Random Only
'CYTDt5'	1	1	1	1	0.99976	0.00315174	0	0	1	0	0	0.1	0	Random Only
'CYTDtl'	1	1	1	1	0.99976	0.00315174	0	0	1	0	0	0.1	0	Random Only
'CYTDtm'	0.992849	0.0592014	1	1	0.999602	0.00376327	3	0	1	1.43541	0	0.1	0	Random Only
'CYTDtn'	0.992823	0.0596155	1	1	0.99976	0.00315174	3	0	1	1.43541	0	0.1	0	Random Only
'CYTK1'	1	1	1	1	0.99976	0.00315174	0	0	1	0	0	0.1	0	Random Only
'CYTK10'	1	1	1	1	0.99976	0.00315174	0	0	1	0	0	0.1	0	Random Only
'CYTK10n'	1	1	1	1	0.99976	0.00315174	0	0	1	0	0	0.1	0	Random Only
'CYTK11'	1	1	1	1	0.99976	0.00315174	0	0	1	0	0	0.1	0	Random Only
'CYTK11n'	1	1	1	1	0.99976	0.00315174	0	0	1	0	0	0.1	0	Random Only
'CYTK12'	1	1	1	1	0.99976	0.00315174	0	0	1	0	0	0.1	0	Random Only
'CYTK12n'	1	1	1	1	0.99976	0.00315174	0	0	1	0	0	0.1	0	Random Only
'CYTK13'	1	1	1	1	0.99976	0.00315174	0	0	1	0	0	0.1	0	Random Only
'CYTK13n'	1	1	1	1	0.99976	0.00315174	0	0	1	0	0	0.1	0	Random Only
'CYTK14'	1	1	1	1	0.99976	0.00315174	0	0	1	0	0	0.1	0	Random Only
'CYTK14n'	1	1	1	1	0.99976	0.00315174	0	0	1	0	0	0.1	0	Random Only
'CYTK1m'	0.992849	0.0592014	1	1	0.999602	0.00376327	3	0	1	1.43541	0	0.1	0	Random Only
'CYTK1n'	1	1	1	1	0.99976	0.00315174	0	0	1	0	0	0.1	0	Random Only
'CYTK2'	1	1	1	1	0.99976	0.00315174	0	0	1	0	0	0.1	0	Random Only
'CYTK2n'	1	1	1	1	0.99976	0.00315174	0	0	1	0	0	0.1	0	Random Only
'CYTK3'	1	1	1	1	0.99976	0.00315174	0	0	1	0	0	0.1	0	Random Only
'CYTK3n'	1	1	1	1	0.99976	0.00315174	0	0	1	0	0	0.1	0	Random Only
'CYTK4'	1	1	1	1	0.99976	0.00315174	0	0	1	0	0	0.1	0	Random Only
'CYTK4n'	1	1	1	1	0.99976	0.00315174	0	0	1	0	0	0.1	0	Random Only
'CYTK5'	1	1	1	1	0.99976	0.00315174	0	0	1	0	0	0.1	0	Random Only
'CYTK5n'	1	1	1	1	0.99976	0.00315174	0	0	1	0	0	0.1	0	Random Only
'CYTK6'	1	1	1	1	0.99976	0.00315174	0	0	1	0	0	0.1	0	Random Only
'CYTK6n'	1	1	1	1	0.99976	0.00315174	0	0	1	0	0	0.1	0	Random Only
'CYTK7'	1	1	1	1	0.99976	0.00315174	0	0	1	0	0	0.1	0	Random Only
'CYTK7n'	1	1	1	1	0.99976	0.00315174	0	0	1	0	0	0.1	0	Random Only
'CYTK8'	1	1	1	1	0.99976	0.00315174	0	0	1	0	0	0.1	0	Random Only
'CYTK8n'	1	1	1	1	0.99976	0.00315174	0	0	1	0	0	0.1	0	Random Only
'CYTK9'	1	1	1	1	0.99976	0.00315174	0	0	1	0	0	0.1	0	Random Only
'CYTK9n'	1	1	1	1	0.99976	0.00315174	0	0	1	0	0	0.1	0	Random Only
'CytOxe-'	0.992823	0.0596155	1	1	0.99976	0.00315174	3	0	1	1.43541	0	0.1	0	Random Only
'D-LACt2'	0.993115	0.0571889	1	1	0.99976	0.00315174	3	0	1	1.43541	0	0.1	0	Random Only
'D-LACtm'	1	1	1	1	0.99976	0.00315174	0	0	1	0	0	0.1	0	Random Only
'DADA'	0.992823	0.0596134	1	1	0.99976	0.00315174	3	0	1	1.43541	0	0.1	0	Random Only
'DADAe'	0.992823	0.0596134	1	1	0.99976	0.00315174	3	0	1	1.43541	0	0.1	0	Random Only
'DADNK'	0.992823	0.0596155	1	1	0.99976	0.00315174	3	0	1	1.43541	0	0.1	0	Random Only
'DADNt4'	0.992823	0.0596134	1	1	0.99976	0.00315174	3	0	1	1.43541	0	0.1	0	Random Only
'DAGK_hs'	0.992823	0.0596155	1	1	0.99976	0.00315174	3	0	1	1.43541	0	0.1	0	Random Only
'DAGKn_hs'	1	1	1	1	0.99976	0.00315174	0	0	1	0	0	0.1	0	Random Only
'DAG_HSter'	1	1	1	1	0.99976	0.00315174	0	0	1	0	0	0.1	0	Random Only
'DAGt'	1	1	1	1	0.99976	0.00315174	0	0	1	0	0	0.1	0	Random Only
'DALAOXx'	0.992823	0.0596155	1	1	0.99976	0.00315174	3	0	1	1.43541	0	0.1	0	Random Only
'DALAt2r'	1	1	1	1	0.99976	0.00315174	0	0	1	0	0	0.1	0	Random Only
'DALAt2rL'	1	1	1	1	0.99976	0.00315174	0	0	1	0	0	0.1	0	Random Only
'DALAxt'	0.992823	0.0596155	1	1	0.99976	0.00315174	3	0	1	1.43541	0	0.1	0	Random Only
'DASCBH'	1	1	1	1	0.99976	0.00315174	0	0	1	0	0	0.1	0	Random Only
'DASCBR'	0.992823	0.0596155	1	1	0.99976	0.00315174	3	0	1	1.43541	0	0.1	0	Random Only
'DASPO1p'	1	1	1	1	0.99976	0.00315174	0	0	1	0	0	0.1	0	Random Only
'DATPtn'	0.979208	0.069581	1	1	0.996086	0.0180995	30	0	21	14.3541	0	2.1	0	Random Only
'DCK1n'	1	1	1	1	0.99976	0.00315174	0	0	1	0	0	0.1	0	Random Only
'DCK2n'	1	1	1	1	0.99976	0.00315174	0	0	1	0	0	0.1	0	Random Only
'DCMPDA'	0.992823	0.0596155	1	1	0.99976	0.00315174	3	0	1	1.43541	0	0.1	0	Random Only
'DCSPTN1COAtx'	1	1	1	1	0.99976	0.00315174	0	0	1	0	0	0.1	0	Random Only
'DCSPTN1CPT1'	1	1	1	1	0.99976	0.00315174	0	0	1	0	0	0.1	0	Random Only
'DCSPTN1CPT2'	1	1	1	1	0.99976	0.00315174	0	0	1	0	0	0.1	0	Random Only
'DCSPTN1CRNt'	1	1	1	1	0.99976	0.00315174	0	0	1	0	0	0.1	0	Random Only
'DCSPTN1t'	1	1	1	1	0.99976	0.00315174	0	0	1	0	0	0.1	0	Random Only
'DCTPtn'	0.979208	0.069581	1	1	0.997447	0.0151626	30	0	17	14.3541	0	1.7	0	Random Only
'DCYTD'	0.992823	0.0596155	1	1	0.99976	0.00315174	3	0	1	1.43541	0	0.1	0	Random Only
'DCYTt'	0.979208	0.069581	1	1	0.994109	0.0215056	30	0	40	14.3541	0	4	0	Random Only
'DEBRISOQUINEt'	1	1	1	1	0.99976	0.00315174	0	0	1	0	0	0.1	0	Random Only
'DEDOLP1_L'	1	1	1	1	0.99976	0.00315174	0	0	1	0	0	0.1	0	Random Only
'DEDOLP1_U'	1	1	1	1	0.99976	0.00315174	0	0	1	0	0	0.1	0	Random Only
'DEDOLP2_L'	1	1	1	1	0.99976	0.00315174	0	0	1	0	0	0.1	0	Random Only
'DEDOLP2_U'	1	1	1	1	0.99976	0.00315174	0	0	1	0	0	0.1	0	Random Only
'DEDOLR_L'	1	1	1	1	0.99976	0.00315174	0	0	1	0	0	0.1	0	Random Only
'DEDOLR_U'	1	1	1	1	0.99976	0.00315174	0	0	1	0	0	0.1	0	Random Only
'DESAT16_2'	0.992823	0.0596155	1	1	0.99976	0.00315174	3	0	1	1.43541	0	0.1	0	Random Only
'DESAT18_10'	1	1	1	1	0.99976	0.00315174	0	0	1	0	0	0.1	0	Random Only
'DESAT18_3'	0.994124	0.0489835	1	1	0.99976	0.00315174	3	0	1	1.43541	0	0.1	0	Random Only
'DESAT18_4'	0.994535	0.0475792	1	1	0.99976	0.00315174	3	0	1	1.43541	0	0.1	0	Random Only
'DESAT18_5'	0.994535	0.0475792	1	1	0.99976	0.00315174	3	0	1	1.43541	0	0.1	0	Random Only
'DESAT18_6'	0.998361	0.0151429	1	1	0.99976	0.00315174	2	0	1	0.956938	0	0.1	0	Random Only
'DESAT18_7'	0.998092	0.018203	1	1	0.99976	0.00315174	2	0	1	0.956938	0	0.1	0	Random Only
'DESAT18_8'	0.998092	0.018203	1	1	0.99976	0.00315174	2	0	1	0.956938	0	0.1	0	Random Only
'DESAT18_9'	1	1	1	1	0.99976	0.00315174	0	0	1	0	0	0.1	0	Random Only
'DESAT20_1'	1	1	1	1	0.99976	0.00315174	0	0	1	0	0	0.1	0	Random Only
'DESAT20_2'	1	1	1	1	0.99976	0.00315174	0	0	1	0	0	0.1	0	Random Only
'DESAT22_1p'	1	1	1	1	0.99976	0.00315174	0	0	1	0	0	0.1	0	Random Only
'DESAT22_2p'	1	1	1	1	0.99976	0.00315174	0	0	1	0	0	0.1	0	Random Only
'DESAT24_1'	1	1	1	1	0.99976	0.00315174	0	0	1	0	0	0.1	0	Random Only
'DGAT'	1	1	1	1	0.99976	0.00315174	0	0	1	0	0	0.1	0	Random Only
'DGCHOLte'	1	1	1	1	0.99976	0.00315174	0	0	1	0	0	0.1	0	Random Only
'DGK1'	0.992994	0.0581923	1	1	0.99976	0.00315174	3	0	1	1.43541	0	0.1	0	Random Only
'DGK2m'	0.989019	0.0565752	1	1	0.999016	0.00819781	13	0	9	6.2201	0	0.9	0	Random Only
'DGNSKm'	0.989019	0.0565752	1	1	0.999016	0.00819781	13	0	9	6.2201	0	0.9	0	Random Only
'DGSNt'	0.979208	0.069581	1	1	0.99386	0.0218779	30	0	41	14.3541	0	4.1	0	Random Only
'DGSNtm'	0.989019	0.0565752	1	1	0.999016	0.00819781	13	0	9	6.2201	0	0.9	0	Random Only
'DGTPtn'	0.979208	0.069581	1	1	0.993984	0.0216943	30	0	40	14.3541	0	4	0	Random Only
'DGULND'	0.992823	0.0596155	1	1	0.99976	0.00315174	3	0	1	1.43541	0	0.1	0	Random Only
'DHAAt1r'	1	1	1	1	0.99976	0.00315174	0	0	1	0	0	0.1	0	Random Only
'DHAPA'	1	1	1	1	0.99976	0.00315174	0	0	1	0	0	0.1	0	Random Only
'DHAPAx'	1	1	1	1	0.99976	0.00315174	0	0	1	0	0	0.1	0	Random Only
'DHCHOLESTANATEtm'	1	1	1	1	0.99976	0.00315174	0	0	1	0	0	0.1	0	Random Only
'DHCR241r'	0.99314	0.0569797	1	1	0.99976	0.00315174	3	0	1	1.43541	0	0.1	0	Random Only
'DHCR242r'	0.99314	0.0569797	1	1	0.99976	0.00315174	3	0	1	1.43541	0	0.1	0	Random Only
'DHCR243r'	0.993137	0.0570042	1	1	0.99976	0.00315174	3	0	1	1.43541	0	0.1	0	Random Only
'DHCR71r'	0.993137	0.0570042	1	1	0.99976	0.00315174	3	0	1	1.43541	0	0.1	0	Random Only
'DHCR72r'	0.993137	0.0570042	1	1	0.99976	0.00315174	3	0	1	1.43541	0	0.1	0	Random Only
'DHCRD1'	0.987135	0.0608549	1	1	0.999001	0.00832051	14	0	9	6.69856	0	0.9	0	Random Only
'DHCRD2'	0.992892	0.0590014	1	1	0.999716	0.00320847	3	0	1	1.43541	0	0.1	0	Random Only
'DHDPBMTm'	1	1	1	1	0.99976	0.00315174	0	0	1	0	0	0.1	0	Random Only
'DHEASt'	1	1	1	1	0.99976	0.00315174	0	0	1	0	0	0.1	0	Random Only
'DHEAStr'	1	1	1	1	0.99976	0.00315174	0	0	1	0	0	0.1	0	Random Only
'DHEAtr'	1	1	1	1	0.99976	0.00315174	0	0	1	0	0	0.1	0	Random Only
'DHFR'	0.978825	0.0699232	1	1	0.996342	0.0176037	30	0	21	14.3541	0	2.1	0	Random Only
'DHFtl'	0.992823	0.0596155	1	1	0.99976	0.00315174	3	0	1	1.43541	0	0.1	0	Random Only
'DHFtm'	0.992823	0.0596155	1	1	0.99976	0.00315174	3	0	1	1.43541	0	0.1	0	Random Only
'DHORD9'	0.691981	0.0373768	0.703731	0.00090168	0.746236	0.0695082	209	6000	993	100	100	99.3	1	Both
'DHORTS'	0.691981	0.0373768	0.703731	0.00090168	0.746236	0.0695082	209	6000	993	100	100	99.3	1	Both
'DHPM1'	1	1	1	1	0.99976	0.00315174	0	0	1	0	0	0.1	0	Random Only
'DHPR'	0.982572	0.0666178	1	1	0.937448	0.0511232	16	0	554	7.6555	0	55.4	0	Random Only
'DHPR2'	0.982572	0.0666178	1	1	0.937448	0.0511232	16	0	554	7.6555	0	55.4	0	Random Only
'DIDPtn'	1	1	1	1	0.99976	0.00315174	0	0	1	0	0	0.1	0	Random Only
'DIGALSGALSIDEte'	1	1	1	1	0.99976	0.00315174	0	0	1	0	0	0.1	0	Random Only
'DIGALSIDEtl'	1	1	1	1	0.99976	0.00315174	0	0	1	0	0	0.1	0	Random Only
'DINt'	0.979208	0.069581	1	1	0.995171	0.0197801	30	0	31	14.3541	0	3.1	0	Random Only
'DITPtn'	1	1	1	1	0.99976	0.00315174	0	0	1	0	0	0.1	0	Random Only
'DLNLCGCPT1'	1	1	1	1	0.99976	0.00315174	0	0	1	0	0	0.1	0	Random Only
'DLNLCGCPT2'	1	1	1	1	0.99976	0.00315174	0	0	1	0	0	0.1	0	Random Only
'DLNLCGCRNt'	1	1	1	1	0.99976	0.00315174	0	0	1	0	0	0.1	0	Random Only
'DLNLCGt'	1	1	1	1	0.99976	0.00315174	0	0	1	0	0	0.1	0	Random Only
'DMATT'	1	1	1	1	0.99976	0.00315174	0	0	1	0	0	0.1	0	Random Only
'DMATTx'	0.99314	0.0569797	1	1	0.99976	0.00315174	3	0	1	1.43541	0	0.1	0	Random Only
'DMHPTCRNCPT1'	1	1	1	1	0.99976	0.00315174	0	0	1	0	0	0.1	0	Random Only
'DMHPTCRNCPT2'	1	1	1	1	0.99976	0.00315174	0	0	1	0	0	0.1	0	Random Only
'DMHPTCRNt'	1	1	1	1	0.99976	0.00315174	0	0	1	0	0	0.1	0	Random Only
'DMHPTCRNte'	1	1	1	1	0.99976	0.00315174	0	0	1	0	0	0.1	0	Random Only
'DMNONCRNCPT2'	1	1	1	1	0.99976	0.00315174	0	0	1	0	0	0.1	0	Random Only
'DMNONCRNt'	1	1	1	1	0.99976	0.00315174	0	0	1	0	0	0.1	0	Random Only
'DM_13-cis-oretn(n)'	1	1	1	1	0.99976	0.00315174	0	0	1	0	0	0.1	0	Random Only
'DM_13-cis-retn(n)'	1	1	1	1	0.99976	0.00315174	0	0	1	0	0	0.1	0	Random Only
'DM_Asn-X-Ser/Thr(ly)'	1	1	1	1	0.99976	0.00315174	0	0	1	0	0	0.1	0	Random Only
'DM_Ser-Gly/Ala-X-Gly(ly)'	1	1	1	1	0.99976	0.00315174	0	0	1	0	0	0.1	0	Random Only
'DM_Ser/Thr(ly)'	1	1	1	1	0.99976	0.00315174	0	0	1	0	0	0.1	0	Random Only
'DM_T_antigen(g)'	1	1	1	1	0.99976	0.00315174	0	0	1	0	0	0.1	0	Random Only
'DM_atp(c)'	0.992823	0.0596155	1	1	0.99976	0.00315174	3	0	1	1.43541	0	0.1	0	Random Only
'DM_avite1(c)'	1	1	1	1	0.99976	0.00315174	0	0	1	0	0	0.1	0	Random Only
'DM_avite2(c)'	1	1	1	1	0.99976	0.00315174	0	0	1	0	0	0.1	0	Random Only
'DM_bvite(c)'	1	1	1	1	0.99976	0.00315174	0	0	1	0	0	0.1	0	Random Only
'DM_datp(m)'	0.979208	0.069581	1	1	0.996956	0.0163367	30	0	19	14.3541	0	1.9	0	Random Only
'DM_datp(n)'	0.979208	0.069581	1	1	0.996086	0.0180995	30	0	21	14.3541	0	2.1	0	Random Only
'DM_dctp(m)'	0.979262	0.0695856	1	1	0.99811	0.0131648	30	0	13	14.3541	0	1.3	0	Random Only
'DM_dctp(n)'	0.979208	0.069581	1	1	0.997447	0.0151626	30	0	17	14.3541	0	1.7	0	Random Only
'DM_dgtp(m)'	0.979208	0.069581	1	1	0.995125	0.0198565	30	0	33	14.3541	0	3.3	0	Random Only
'DM_dgtp(n)'	0.979208	0.069581	1	1	0.993984	0.0216943	30	0	40	14.3541	0	4	0	Random Only
'DM_dsT_antigen(g)'	1	1	1	1	0.99976	0.00315174	0	0	1	0	0	0.1	0	Random Only
'DM_dttp(m)'	0.989014	0.0565982	1	1	0.999027	0.00811635	13	0	9	6.2201	0	0.9	0	Random Only
'DM_dttp(n)'	0.984001	0.0669411	1	1	0.998919	0.00892218	16	0	9	7.6555	0	0.9	0	Random Only
'DM_ethamp(r)'	0.987162	0.0608257	1	1	0.999005	0.00829094	14	0	9	6.69856	0	0.9	0	Random Only
'DM_gpi_sig(er)'	1	1	1	1	0.99976	0.00315174	0	0	1	0	0	0.1	0	Random Only
'DM_kdn(c)'	0.992991	0.0582168	1	1	0.99976	0.00315174	3	0	1	1.43541	0	0.1	0	Random Only
'DM_m(em)3gacpail_prot_hs(r)'	1	1	1	1	0.99976	0.00315174	0	0	1	0	0	0.1	0	Random Only
'DM_mem2emgacpail_prot_hs(r)'	1	1	1	1	0.99976	0.00315174	0	0	1	0	0	0.1	0	Random Only
'DM_n5m2masn(g)'	1	1	1	1	0.99976	0.00315174	0	0	1	0	0	0.1	0	Random Only
'DM_oretn(n)'	1	1	1	1	0.99976	0.00315174	0	0	1	0	0	0.1	0	Random Only
'DM_sTn_antigen(g)'	1	1	1	1	0.99976	0.00315174	0	0	1	0	0	0.1	0	Random Only
'DM_sprm(c)'	1	1	1	1	0.99976	0.00315174	0	0	1	0	0	0.1	0	Random Only
'DM_yvite(c)'	1	1	1	1	0.99976	0.00315174	0	0	1	0	0	0.1	0	Random Only
'DNADDP'	0.992823	0.0596155	1	1	0.99976	0.00315174	3	0	1	1.43541	0	0.1	0	Random Only
'DNADtn'	0.992823	0.0596155	1	1	0.99976	0.00315174	3	0	1	1.43541	0	0.1	0	Random Only
'DNAMTSEn'	1	1	1	1	0.99976	0.00315174	0	0	1	0	0	0.1	0	Random Only
'DNAMTn'	1	1	1	1	0.99976	0.00315174	0	0	1	0	0	0.1	0	Random Only
'DNDPt10m'	1	1	1	1	0.99976	0.00315174	0	0	1	0	0	0.1	0	Random Only
'DNDPt11m'	1	1	1	1	0.99976	0.00315174	0	0	1	0	0	0.1	0	Random Only
'DNDPt12m'	0.988997	0.0566119	1	1	0.999007	0.00826945	13	0	9	6.2201	0	0.9	0	Random Only
'DNDPt13m'	0.988997	0.0566119	1	1	0.999007	0.00826945	13	0	9	6.2201	0	0.9	0	Random Only
'DNDPt14m'	1	1	1	1	0.99976	0.00315174	0	0	1	0	0	0.1	0	Random Only
'DNDPt15m'	1	1	1	1	0.99976	0.00315174	0	0	1	0	0	0.1	0	Random Only
'DNDPt16m'	1	1	1	1	0.99976	0.00315174	0	0	1	0	0	0.1	0	Random Only
'DNDPt17m'	1	1	1	1	0.99976	0.00315174	0	0	1	0	0	0.1	0	Random Only
'DNDPt18m'	0.988997	0.0566119	1	1	0.999007	0.00826945	13	0	9	6.2201	0	0.9	0	Random Only
'DNDPt19m'	0.988997	0.0566119	1	1	0.999007	0.00826945	13	0	9	6.2201	0	0.9	0	Random Only
'DNDPt1m'	0.988997	0.0566119	1	1	0.999007	0.00826945	13	0	9	6.2201	0	0.9	0	Random Only
'DNDPt20m'	0.988997	0.0566119	1	1	0.999007	0.00826945	13	0	9	6.2201	0	0.9	0	Random Only
'DNDPt21m'	0.988997	0.0566119	1	1	0.999007	0.00826945	13	0	9	6.2201	0	0.9	0	Random Only
'DNDPt22m'	1	1	1	1	0.99976	0.00315174	0	0	1	0	0	0.1	0	Random Only
'DNDPt23m'	1	1	1	1	0.99976	0.00315174	0	0	1	0	0	0.1	0	Random Only
'DNDPt24m'	1	1	1	1	0.99976	0.00315174	0	0	1	0	0	0.1	0	Random Only
'DNDPt25m'	1	1	1	1	0.99976	0.00315174	0	0	1	0	0	0.1	0	Random Only
'DNDPt26m'	1	1	1	1	0.99976	0.00315174	0	0	1	0	0	0.1	0	Random Only
'DNDPt27m'	1	1	1	1	0.99976	0.00315174	0	0	1	0	0	0.1	0	Random Only
'DNDPt28m'	1	1	1	1	0.99976	0.00315174	0	0	1	0	0	0.1	0	Random Only
'DNDPt29m'	1	1	1	1	0.99976	0.00315174	0	0	1	0	0	0.1	0	Random Only
'DNDPt2m'	0.988997	0.0566119	1	1	0.999007	0.00826945	13	0	9	6.2201	0	0.9	0	Random Only
'DNDPt30m'	0.988997	0.0566119	1	1	0.999007	0.00826945	13	0	9	6.2201	0	0.9	0	Random Only
'DNDPt31m'	0.988997	0.0566119	1	1	0.999007	0.00826945	13	0	9	6.2201	0	0.9	0	Random Only
'DNDPt32m'	0.988997	0.0566119	1	1	0.999007	0.00826945	13	0	9	6.2201	0	0.9	0	Random Only
'DNDPt33m'	1	1	1	1	0.99976	0.00315174	0	0	1	0	0	0.1	0	Random Only
'DNDPt34m'	1	1	1	1	0.99976	0.00315174	0	0	1	0	0	0.1	0	Random Only
'DNDPt35m'	1	1	1	1	0.99976	0.00315174	0	0	1	0	0	0.1	0	Random Only
'DNDPt36m'	1	1	1	1	0.99976	0.00315174	0	0	1	0	0	0.1	0	Random Only
'DNDPt37m'	1	1	1	1	0.99976	0.00315174	0	0	1	0	0	0.1	0	Random Only
'DNDPt38m'	1	1	1	1	0.99976	0.00315174	0	0	1	0	0	0.1	0	Random Only
'DNDPt39m'	1	1	1	1	0.99976	0.00315174	0	0	1	0	0	0.1	0	Random Only
'DNDPt3m'	1	1	1	1	0.99976	0.00315174	0	0	1	0	0	0.1	0	Random Only
'DNDPt40m'	1	1	1	1	0.99976	0.00315174	0	0	1	0	0	0.1	0	Random Only
'DNDPt41m'	1	1	1	1	0.99976	0.00315174	0	0	1	0	0	0.1	0	Random Only
'DNDPt42m'	0.988997	0.0566119	1	1	0.999007	0.00826945	13	0	9	6.2201	0	0.9	0	Random Only
'DNDPt43m'	0.988997	0.0566119	1	1	0.999007	0.00826945	13	0	9	6.2201	0	0.9	0	Random Only
'DNDPt44m'	0.988997	0.0566119	1	1	0.999007	0.00826945	13	0	9	6.2201	0	0.9	0	Random Only
'DNDPt45m'	0.988997	0.0566119	1	1	0.999007	0.00826945	13	0	9	6.2201	0	0.9	0	Random Only
'DNDPt46m'	1	1	1	1	0.99976	0.00315174	0	0	1	0	0	0.1	0	Random Only
'DNDPt47m'	1	1	1	1	0.99976	0.00315174	0	0	1	0	0	0.1	0	Random Only
'DNDPt48m'	1	1	1	1	0.99976	0.00315174	0	0	1	0	0	0.1	0	Random Only
'DNDPt49m'	1	1	1	1	0.99976	0.00315174	0	0	1	0	0	0.1	0	Random Only
'DNDPt4m'	1	1	1	1	0.99976	0.00315174	0	0	1	0	0	0.1	0	Random Only
'DNDPt50m'	1	1	1	1	0.99976	0.00315174	0	0	1	0	0	0.1	0	Random Only
'DNDPt51m'	1	1	1	1	0.99976	0.00315174	0	0	1	0	0	0.1	0	Random Only
'DNDPt52m'	1	1	1	1	0.99976	0.00315174	0	0	1	0	0	0.1	0	Random Only
'DNDPt53m'	1	1	1	1	0.99976	0.00315174	0	0	1	0	0	0.1	0	Random Only
'DNDPt54m'	1	1	1	1	0.99976	0.00315174	0	0	1	0	0	0.1	0	Random Only
'DNDPt55m'	0.988997	0.0566119	1	1	0.999007	0.00826945	13	0	9	6.2201	0	0.9	0	Random Only
'DNDPt56m'	0.988997	0.0566119	1	1	0.999007	0.00826945	13	0	9	6.2201	0	0.9	0	Random Only
'DNDPt57m'	0.988997	0.0566119	1	1	0.999007	0.00826945	13	0	9	6.2201	0	0.9	0	Random Only
'DNDPt58m'	0.988997	0.0566119	1	1	0.999007	0.00826945	13	0	9	6.2201	0	0.9	0	Random Only
'DNDPt59m'	1	1	1	1	0.99976	0.00315174	0	0	1	0	0	0.1	0	Random Only
'DNDPt5m'	1	1	1	1	0.99976	0.00315174	0	0	1	0	0	0.1	0	Random Only
'DNDPt60m'	1	1	1	1	0.99976	0.00315174	0	0	1	0	0	0.1	0	Random Only
'DNDPt61m'	1	1	1	1	0.99976	0.00315174	0	0	1	0	0	0.1	0	Random Only
'DNDPt62m'	1	1	1	1	0.99976	0.00315174	0	0	1	0	0	0.1	0	Random Only
'DNDPt63m'	1	1	1	1	0.99976	0.00315174	0	0	1	0	0	0.1	0	Random Only
'DNDPt6m'	1	1	1	1	0.99976	0.00315174	0	0	1	0	0	0.1	0	Random Only
'DNDPt7m'	1	1	1	1	0.99976	0.00315174	0	0	1	0	0	0.1	0	Random Only
'DNDPt8m'	1	1	1	1	0.99976	0.00315174	0	0	1	0	0	0.1	0	Random Only
'DNDPt9m'	1	1	1	1	0.99976	0.00315174	0	0	1	0	0	0.1	0	Random Only
'DOGULND1'	1	1	1	1	0.99976	0.00315174	0	0	1	0	0	0.1	0	Random Only
'DOGULND2'	1	1	1	1	0.99976	0.00315174	0	0	1	0	0	0.1	0	Random Only
'DOGULNO1'	1	1	1	1	0.99976	0.00315174	0	0	1	0	0	0.1	0	Random Only
'DOGULNO2'	1	1	1	1	0.99976	0.00315174	0	0	1	0	0	0.1	0	Random Only
'DOLASNT_Ler'	0.992823	0.0596155	1	1	0.99976	0.00315174	3	0	1	1.43541	0	0.1	0	Random Only
'DOLASNT_Uer'	0.992823	0.0596155	1	1	0.99976	0.00315174	3	0	1	1.43541	0	0.1	0	Random Only
'DOLDPP_Ler'	0.992823	0.0596155	1	1	0.99976	0.00315174	3	0	1	1.43541	0	0.1	0	Random Only
'DOLDPP_Uer'	0.992823	0.0596155	1	1	0.99976	0.00315174	3	0	1	1.43541	0	0.1	0	Random Only
'DOLGLCP_Lter'	0.992823	0.0596155	1	1	0.99976	0.00315174	3	0	1	1.43541	0	0.1	0	Random Only
'DOLGLCP_Uter'	0.992823	0.0596155	1	1	0.99976	0.00315174	3	0	1	1.43541	0	0.1	0	Random Only
'DOLGPP_Ler'	0.992823	0.0596155	1	1	0.99976	0.00315174	3	0	1	1.43541	0	0.1	0	Random Only
'DOLGPP_Uer'	0.992823	0.0596155	1	1	0.99976	0.00315174	3	0	1	1.43541	0	0.1	0	Random Only
'DOLICHOL_Lter'	0.992823	0.0596155	1	1	0.99976	0.00315174	3	0	1	1.43541	0	0.1	0	Random Only
'DOLICHOL_Uter'	0.992823	0.0596155	1	1	0.99976	0.00315174	3	0	1	1.43541	0	0.1	0	Random Only
'DOLK_L'	0.992823	0.0596155	1	1	0.99976	0.00315174	3	0	1	1.43541	0	0.1	0	Random Only
'DOLK_U'	0.992823	0.0596155	1	1	0.99976	0.00315174	3	0	1	1.43541	0	0.1	0	Random Only
'DOLMANP_Lter'	0.992823	0.0596155	1	1	0.99976	0.00315174	3	0	1	1.43541	0	0.1	0	Random Only
'DOLMANP_Uter'	0.992823	0.0596155	1	1	0.99976	0.00315174	3	0	1	1.43541	0	0.1	0	Random Only
'DOLPGT1_Ler'	0.992823	0.0596155	1	1	0.99976	0.00315174	3	0	1	1.43541	0	0.1	0	Random Only
'DOLPGT1_Uer'	0.992823	0.0596155	1	1	0.99976	0.00315174	3	0	1	1.43541	0	0.1	0	Random Only
'DOLPGT2_Ler'	0.992823	0.0596155	1	1	0.99976	0.00315174	3	0	1	1.43541	0	0.1	0	Random Only
'DOLPGT2_Uer'	0.992823	0.0596155	1	1	0.99976	0.00315174	3	0	1	1.43541	0	0.1	0	Random Only
'DOLPGT3_Ler'	0.992823	0.0596155	1	1	0.99976	0.00315174	3	0	1	1.43541	0	0.1	0	Random Only
'DOLPGT3_Uer'	0.992823	0.0596155	1	1	0.99976	0.00315174	3	0	1	1.43541	0	0.1	0	Random Only
'DOLPH_Ler'	0.992823	0.0596155	1	1	0.99976	0.00315174	3	0	1	1.43541	0	0.1	0	Random Only
'DOLPH_Uer'	0.992823	0.0596155	1	1	0.99976	0.00315174	3	0	1	1.43541	0	0.1	0	Random Only
'DOLPMT1_Ler'	0.992823	0.0596155	1	1	0.99976	0.00315174	3	0	1	1.43541	0	0.1	0	Random Only
'DOLPMT1_Uer'	0.992823	0.0596155	1	1	0.99976	0.00315174	3	0	1	1.43541	0	0.1	0	Random Only
'DOLPMT2_Ler'	0.992823	0.0596155	1	1	0.99976	0.00315174	3	0	1	1.43541	0	0.1	0	Random Only
'DOLPMT2_Uer'	0.992823	0.0596155	1	1	0.99976	0.00315174	3	0	1	1.43541	0	0.1	0	Random Only
'DOLPMT3_Ler'	0.992823	0.0596155	1	1	0.99976	0.00315174	3	0	1	1.43541	0	0.1	0	Random Only
'DOLPMT3_Uer'	0.992823	0.0596155	1	1	0.99976	0.00315174	3	0	1	1.43541	0	0.1	0	Random Only
'DOLPMT4_Ler'	0.992823	0.0596155	1	1	0.99976	0.00315174	3	0	1	1.43541	0	0.1	0	Random Only
'DOLPMT4_Uer'	0.992823	0.0596155	1	1	0.99976	0.00315174	3	0	1	1.43541	0	0.1	0	Random Only
'DOLPMT_L'	0.992823	0.0596155	1	1	0.99976	0.00315174	3	0	1	1.43541	0	0.1	0	Random Only
'DOLPMT_U'	0.992823	0.0596155	1	1	0.99976	0.00315174	3	0	1	1.43541	0	0.1	0	Random Only
'DOLP_Lter'	0.992823	0.0596155	1	1	0.99976	0.00315174	3	0	1	1.43541	0	0.1	0	Random Only
'DOLP_Uter'	0.992823	0.0596155	1	1	0.99976	0.00315174	3	0	1	1.43541	0	0.1	0	Random Only
'DOPABMO'	1	1	1	1	0.99976	0.00315174	0	0	1	0	0	0.1	0	Random Only
'DOPAMT'	1	1	1	1	0.99976	0.00315174	0	0	1	0	0	0.1	0	Random Only
'DOPASFt'	1	1	1	1	0.99976	0.00315174	0	0	1	0	0	0.1	0	Random Only
'DOPASULT'	1	1	1	1	0.99976	0.00315174	0	0	1	0	0	0.1	0	Random Only
'DOPAVESSEC'	0.992823	0.0596155	1	1	0.99976	0.00315174	3	0	1	1.43541	0	0.1	0	Random Only
'DOPAt4(2)r'	1	1	1	1	0.99976	0.00315174	0	0	1	0	0	0.1	0	Random Only
'DOPAtu'	1	1	1	1	0.99976	0.00315174	0	0	1	0	0	0.1	0	Random Only
'DPCOAK'	1	1	1	1	0.99976	0.00315174	0	0	1	0	0	0.1	0	Random Only
'DPCOAPP'	0.992823	0.0596155	1	1	0.99976	0.00315174	3	0	1	1.43541	0	0.1	0	Random Only
'DPCOAtl'	1	1	1	1	0.99976	0.00315174	0	0	1	0	0	0.1	0	Random Only
'DPHMBDCm'	1	1	1	1	0.99976	0.00315174	0	0	1	0	0	0.1	0	Random Only
'DPMVDx'	0.99314	0.0569797	1	1	0.99976	0.00315174	3	0	1	1.43541	0	0.1	0	Random Only
'DRIBt'	0.992994	0.0581923	1	1	0.99976	0.00315174	3	0	1	1.43541	0	0.1	0	Random Only
'DRPA'	1	1	1	1	0.99976	0.00315174	0	0	1	0	0	0.1	0	Random Only
'DSAT'	0.987135	0.0608549	1	1	0.999001	0.00832051	14	0	9	6.69856	0	0.9	0	Random Only
'DTDPtn'	1	1	1	1	0.99976	0.00315174	0	0	1	0	0	0.1	0	Random Only
'DTMPK'	0.984001	0.0669411	1	1	0.998919	0.00892218	16	0	9	7.6555	0	0.9	0	Random Only
'DTTPtn'	1	1	1	1	0.99976	0.00315174	0	0	1	0	0	0.1	0	Random Only
'DUDPtn'	1	1	1	1	0.99976	0.00315174	0	0	1	0	0	0.1	0	Random Only
'DUMPtn'	1	1	1	1	0.99976	0.00315174	0	0	1	0	0	0.1	0	Random Only
'DURAD'	1	1	1	1	0.99976	0.00315174	0	0	1	0	0	0.1	0	Random Only
'DURAD2'	1	1	1	1	0.99976	0.00315174	0	0	1	0	0	0.1	0	Random Only
'DURIK1'	0.992823	0.0596155	1	1	0.99976	0.00315174	3	0	1	1.43541	0	0.1	0	Random Only
'DURIK1m'	0.992823	0.0596155	1	1	0.99976	0.00315174	3	0	1	1.43541	0	0.1	0	Random Only
'DURIPP'	0.978559	0.0701671	1	1	0.996322	0.0176423	30	0	21	14.3541	0	2.1	0	Random Only
'DURIt'	0.979512	0.0695613	1	1	0.998511	0.0113639	30	0	12	14.3541	0	1.2	0	Random Only
'DURItn'	1	1	1	1	0.99976	0.00315174	0	0	1	0	0	0.1	0	Random Only
'DUTPDPm'	0.992823	0.0596155	1	1	0.99976	0.00315174	3	0	1	1.43541	0	0.1	0	Random Only
'DUTPDPn'	1	1	1	1	0.99976	0.00315174	0	0	1	0	0	0.1	0	Random Only
'EAFLATOXINte'	1	1	1	1	0.99976	0.00315174	0	0	1	0	0	0.1	0	Random Only
'EBASTINEOHte'	1	1	1	1	0.99976	0.00315174	0	0	1	0	0	0.1	0	Random Only
'EBASTINEte'	1	1	1	1	0.99976	0.00315174	0	0	1	0	0	0.1	0	Random Only
'EBP1r'	0.99314	0.0569797	1	1	0.99976	0.00315174	3	0	1	1.43541	0	0.1	0	Random Only
'EBP2r'	0.99314	0.0569797	1	1	0.99976	0.00315174	3	0	1	1.43541	0	0.1	0	Random Only
'ECOAH12m'	0.98526	0.0651787	1	1	0.999662	0.00347166	15	0	1	7.17703	0	0.1	0	Random Only
'ECOAH1m'	1	1	1	1	0.99976	0.00315174	0	0	1	0	0	0.1	0	Random Only
'ECOAH1x'	1	1	1	1	0.99976	0.00315174	0	0	1	0	0	0.1	0	Random Only
'ECOAH9m'	1	1	1	1	0.99976	0.00315174	0	0	1	0	0	0.1	0	Random Only
'EGMESTr'	1	1	1	1	0.99976	0.00315174	0	0	1	0	0	0.1	0	Random Only
'EHGLAT'	1	1	1	1	0.99976	0.00315174	0	0	1	0	0	0.1	0	Random Only
'EHGLAT2m'	1	1	1	1	0.99976	0.00315174	0	0	1	0	0	0.1	0	Random Only
'EHGLATm'	1	1	1	1	0.99976	0.00315174	0	0	1	0	0	0.1	0	Random Only
'EICOSTETCPT1'	1	1	1	1	0.99976	0.00315174	0	0	1	0	0	0.1	0	Random Only
'EICOSTETCPT2'	1	1	1	1	0.99976	0.00315174	0	0	1	0	0	0.1	0	Random Only
'EICOSTETCRNt'	1	1	1	1	0.99976	0.00315174	0	0	1	0	0	0.1	0	Random Only
'EICOSTETt'	1	1	1	1	0.99976	0.00315174	0	0	1	0	0	0.1	0	Random Only
'ELAIDCPT1'	1	1	1	1	0.99976	0.00315174	0	0	1	0	0	0.1	0	Random Only
'ELAIDCPT2'	1	1	1	1	0.99976	0.00315174	0	0	1	0	0	0.1	0	Random Only
'ELAIDCRNt'	1	1	1	1	0.99976	0.00315174	0	0	1	0	0	0.1	0	Random Only
'ELAIDt'	0.995212	0.0397898	1	1	0.99976	0.00315174	3	0	1	1.43541	0	0.1	0	Random Only
'ENGASE'	1	1	1	1	0.99976	0.00315174	0	0	1	0	0	0.1	0	Random Only
'ENGASE2'	1	1	1	1	0.99976	0.00315174	0	0	1	0	0	0.1	0	Random Only
'ENGASE2ly'	0.992823	0.0596155	1	1	0.99976	0.00315174	3	0	1	1.43541	0	0.1	0	Random Only
'ENMAN1g'	1	1	1	1	0.99976	0.00315174	0	0	1	0	0	0.1	0	Random Only
'ENMAN2g'	1	1	1	1	0.99976	0.00315174	0	0	1	0	0	0.1	0	Random Only
'ENMAN3g'	1	1	1	1	0.99976	0.00315174	0	0	1	0	0	0.1	0	Random Only
'ENMAN4g'	1	1	1	1	0.99976	0.00315174	0	0	1	0	0	0.1	0	Random Only
'ENMAN5g'	1	1	1	1	0.99976	0.00315174	0	0	1	0	0	0.1	0	Random Only
'ENMAN6g'	1	1	1	1	0.99976	0.00315174	0	0	1	0	0	0.1	0	Random Only
'ENO'	0.990629	0.060689	1	1	0.99976	0.00315174	7	0	1	3.34928	0	0.1	0	Random Only
'ESTRADIOLGLCt'	0.992823	0.0596155	1	1	0.99976	0.00315174	3	0	1	1.43541	0	0.1	0	Random Only
'ESTRADIOLGLCt2'	0.992823	0.0596155	1	1	0.99976	0.00315174	3	0	1	1.43541	0	0.1	0	Random Only
'ESTRADIOLGLCtr'	1	1	1	1	0.99976	0.00315174	0	0	1	0	0	0.1	0	Random Only
'ESTRADIOLt'	1	1	1	1	0.99976	0.00315174	0	0	1	0	0	0.1	0	Random Only
'ESTRADIOLtr'	1	1	1	1	0.99976	0.00315174	0	0	1	0	0	0.1	0	Random Only
'ESTRIOLGLCte'	1	1	1	1	0.99976	0.00315174	0	0	1	0	0	0.1	0	Random Only
'ESTRIOLGLCtr'	1	1	1	1	0.99976	0.00315174	0	0	1	0	0	0.1	0	Random Only
'ESTRONEGLCt'	1	1	1	1	0.99976	0.00315174	0	0	1	0	0	0.1	0	Random Only
'ESTRONEGLCtr'	1	1	1	1	0.99976	0.00315174	0	0	1	0	0	0.1	0	Random Only
'ESTRONESt'	1	1	1	1	0.99976	0.00315174	0	0	1	0	0	0.1	0	Random Only
'ESTRONESt2'	1	1	1	1	0.99976	0.00315174	0	0	1	0	0	0.1	0	Random Only
'ESTRONEtr'	1	1	1	1	0.99976	0.00315174	0	0	1	0	0	0.1	0	Random Only
'ESTSULT'	0.992823	0.0596155	1	1	0.99976	0.00315174	3	0	1	1.43541	0	0.1	0	Random Only
'ETF'	0.992809	0.059614	1	1	0.998796	0.00957463	3	0	8	1.43541	0	0.8	0	Random Only
'ETFQO'	0.992809	0.059614	1	1	0.998796	0.00957463	3	0	8	1.43541	0	0.8	0	Random Only
'ETHAK'	0.992823	0.0596155	1	1	0.99976	0.00315174	3	0	1	1.43541	0	0.1	0	Random Only
'ETHP'	0.992823	0.0596155	1	1	0.99976	0.00315174	3	0	1	1.43541	0	0.1	0	Random Only
'ETOHMO'	1	1	1	1	0.99976	0.00315174	0	0	1	0	0	0.1	0	Random Only
'ETOHt'	1	1	1	1	0.99976	0.00315174	0	0	1	0	0	0.1	0	Random Only
'ETOHtx'	1	1	1	1	0.99976	0.00315174	0	0	1	0	0	0.1	0	Random Only
'EX_10fthf(e)'	1	1	1	1	0.99976	0.00315174	0	0	1	0	0	0.1	0	Random Only
'EX_10fthf5glu(e)'	1	1	1	1	0.99976	0.00315174	0	0	1	0	0	0.1	0	Random Only
'EX_10fthf6glu(e)'	1	1	1	1	0.99976	0.00315174	0	0	1	0	0	0.1	0	Random Only
'EX_10fthf7glu(e)'	1	1	1	1	0.99976	0.00315174	0	0	1	0	0	0.1	0	Random Only
'EX_11-cis-retfa(e)'	1	1	1	1	0.99976	0.00315174	0	0	1	0	0	0.1	0	Random Only
'EX_13-cis-retnglc(e)'	1	1	1	1	0.99976	0.00315174	0	0	1	0	0	0.1	0	Random Only
'EX_1glyc_hs(e)'	0.993626	0.053413	1	1	0.99976	0.00315174	3	0	1	1.43541	0	0.1	0	Random Only
'EX_1mncam(e)'	1	1	1	1	0.99976	0.00315174	0	0	1	0	0	0.1	0	Random Only
'EX_2425dhvitd2(e)'	1	1	1	1	0.99976	0.00315174	0	0	1	0	0	0.1	0	Random Only
'EX_2425dhvitd3(e)'	0.993167	0.0567611	1	1	0.99976	0.00315174	3	0	1	1.43541	0	0.1	0	Random Only
'EX_24nph(e)'	1	1	1	1	0.99976	0.00315174	0	0	1	0	0	0.1	0	Random Only
'EX_25hvitd2(e)'	1	1	1	1	0.99976	0.00315174	0	0	1	0	0	0.1	0	Random Only
'EX_25hvitd3(e)'	0.993153	0.0568707	1	1	0.99976	0.00315174	3	0	1	1.43541	0	0.1	0	Random Only
'EX_2hb(e)'	0.863267	0.0670003	0.875092	0.00105975	0.934503	0.0553802	196	6000	554	93.7799	100	55.4	1	Both
'EX_2mcit(e)'	0.86725	0.0726129	0.875092	0.00105975	0.934503	0.0553802	187	6000	554	89.4737	100	55.4	1	Both
'EX_35cgmp(e)'	0.979208	0.069581	1	1	0.995142	0.0198286	30	0	32	14.3541	0	3.2	0	Random Only
'EX_3aib(e)'	0.986852	0.0639271	1	1	0.999687	0.00344935	13	0	1	6.2201	0	0.1	0	Random Only
'EX_3mlda(e)'	0.991049	0.0601875	1	1	0.966344	0.0490255	8	0	280	3.82775	0	28	0	Random Only
'EX_4abut(e)'	0.980363	0.0692392	1	1	0.99862	0.0107584	26	0	11	12.4402	0	1.1	0	Random Only
'EX_4hdebrisoquine(e)'	1	1	1	1	0.99976	0.00315174	0	0	1	0	0	0.1	0	Random Only
'EX_4hphac(e)'	0.99273	0.0596118	1	1	0.999739	0.00316964	3	0	1	1.43541	0	0.1	0	Random Only
'EX_4mptnl(e)'	1	1	1	1	0.99976	0.00315174	0	0	1	0	0	0.1	0	Random Only
'EX_4nph(e)'	1	1	1	1	0.99976	0.00315174	0	0	1	0	0	0.1	0	Random Only
'EX_4nphsf(e)'	1	1	1	1	0.99976	0.00315174	0	0	1	0	0	0.1	0	Random Only
'EX_4pyrdx(e)'	1	1	1	1	0.99976	0.00315174	0	0	1	0	0	0.1	0	Random Only
'EX_5adtststerone(e)'	1	1	1	1	0.99976	0.00315174	0	0	1	0	0	0.1	0	Random Only
'EX_5adtststeroneglc(e)'	1	1	1	1	0.99976	0.00315174	0	0	1	0	0	0.1	0	Random Only
'EX_5dhf(e)'	1	1	1	1	0.99976	0.00315174	0	0	1	0	0	0.1	0	Random Only
'EX_5fthf(e)'	1	1	1	1	0.99976	0.00315174	0	0	1	0	0	0.1	0	Random Only
'EX_5htrp(e)'	0.901471	0.0750717	0.913107	0.00448488	0.752874	0.0652703	177	6000	995	84.689	100	99.5	1	Both
'EX_5mthf(e)'	1	1	1	1	0.99976	0.00315174	0	0	1	0	0	0.1	0	Random Only
'EX_5thf(e)'	1	1	1	1	0.99976	0.00315174	0	0	1	0	0	0.1	0	Random Only
'EX_6dhf(e)'	1	1	1	1	0.99976	0.00315174	0	0	1	0	0	0.1	0	Random Only
'EX_6htststerone(e)'	1	1	1	1	0.99976	0.00315174	0	0	1	0	0	0.1	0	Random Only
'EX_6thf(e)'	1	1	1	1	0.99976	0.00315174	0	0	1	0	0	0.1	0	Random Only
'EX_7dhf(e)'	1	1	1	1	0.99976	0.00315174	0	0	1	0	0	0.1	0	Random Only
'EX_7thf(e)'	1	1	1	1	0.99976	0.00315174	0	0	1	0	0	0.1	0	Random Only
'EX_9-cis-retfa(e)'	1	1	1	1	0.99976	0.00315174	0	0	1	0	0	0.1	0	Random Only
'EX_CLPND(e)'	1	1	1	1	0.99976	0.00315174	0	0	1	0	0	0.1	0	Random Only
'EX_Lcystin(e)'	1	1	1	1	0.99976	0.00315174	0	0	1	0	0	0.1	0	Random Only
'EX_Rtotal(e)'	0.994259	0.0497866	1	1	0.99976	0.00315174	3	0	1	1.43541	0	0.1	0	Random Only
'EX_Rtotal2(e)'	0.994259	0.0497866	1	1	0.99976	0.00315174	3	0	1	1.43541	0	0.1	0	Random Only
'EX_Rtotal3(e)'	0.994259	0.0497866	1	1	0.99976	0.00315174	3	0	1	1.43541	0	0.1	0	Random Only
'EX_Tyr-ggn(e)'	1	1	1	1	0.99976	0.00315174	0	0	1	0	0	0.1	0	Random Only
'EX_abt(e)'	0.993295	0.0556941	1	1	0.99976	0.00315174	3	0	1	1.43541	0	0.1	0	Random Only
'EX_ac(e)'	0.993072	0.0575653	1	1	0.99976	0.00315174	3	0	1	1.43541	0	0.1	0	Random Only
'EX_acac(e)'	0.992823	0.0596155	1	1	0.99976	0.00315174	3	0	1	1.43541	0	0.1	0	Random Only
'EX_acald(e)'	1	1	1	1	0.99976	0.00315174	0	0	1	0	0	0.1	0	Random Only
'EX_acetone(e)'	0.992823	0.0596155	1	1	0.99976	0.00315174	3	0	1	1.43541	0	0.1	0	Random Only
'EX_acgalfucgalacgalfuc12gal14acglcgalgluside_hs(e)'	1	1	1	1	0.99976	0.00315174	0	0	1	0	0	0.1	0	Random Only
'EX_acgalfucgalacgalfucgalacglcgal14acglcgalgluside_hs(e)'	1	1	1	1	0.99976	0.00315174	0	0	1	0	0	0.1	0	Random Only
'EX_acgam(e)'	1	1	1	1	0.99976	0.00315174	0	0	1	0	0	0.1	0	Random Only
'EX_ach(e)'	1	1	1	1	0.99976	0.00315174	0	0	1	0	0	0.1	0	Random Only
'EX_acn13acngalgbside_hs(e)'	1	1	1	1	0.99976	0.00315174	0	0	1	0	0	0.1	0	Random Only
'EX_acn23acngalgbside_hs(e)'	1	1	1	1	0.99976	0.00315174	0	0	1	0	0	0.1	0	Random Only
'EX_acnacngal14acglcgalgluside_hs(e)'	1	1	1	1	0.99976	0.00315174	0	0	1	0	0	0.1	0	Random Only
'EX_acnacngalgbside_hs(e)'	1	1	1	1	0.99976	0.00315174	0	0	1	0	0	0.1	0	Random Only
'EX_acngalacglcgal14acglcgalgluside_hs(e)'	1	1	1	1	0.99976	0.00315174	0	0	1	0	0	0.1	0	Random Only
'EX_ade(e)'	0.979208	0.069581	1	1	0.99386	0.0218779	30	0	41	14.3541	0	4.1	0	Random Only
'EX_adn(e)'	0.979208	0.069581	1	1	0.99386	0.0218779	30	0	41	14.3541	0	4.1	0	Random Only
'EX_adp'	1	1	1	1	0.99976	0.00315174	0	0	1	0	0	0.1	0	Random Only
'EX_adprbp(e)'	1	1	1	1	0.99976	0.00315174	0	0	1	0	0	0.1	0	Random Only
'EX_adprib(e)'	1	1	1	1	0.99976	0.00315174	0	0	1	0	0	0.1	0	Random Only
'EX_adrn(e)'	1	1	1	1	0.99976	0.00315174	0	0	1	0	0	0.1	0	Random Only
'EX_adrnl(e)'	1	1	1	1	0.99976	0.00315174	0	0	1	0	0	0.1	0	Random Only
'EX_aflatoxin(e)'	1	1	1	1	0.99976	0.00315174	0	0	1	0	0	0.1	0	Random Only
'EX_ahandrostanglc(e)'	1	1	1	1	0.99976	0.00315174	0	0	1	0	0	0.1	0	Random Only
'EX_ak2lgchol_hs(e)'	1	1	1	1	0.99976	0.00315174	0	0	1	0	0	0.1	0	Random Only
'EX_akg(e)'	0.99143	0.06025	1	1	0.99976	0.00315174	6	0	1	2.87081	0	0.1	0	Random Only
'EX_ala-B(e)'	1	1	1	1	0.99976	0.00315174	0	0	1	0	0	0.1	0	Random Only
'EX_ala-D(e)'	0.989084	0.0387174	1	1	0.99386	0.0218779	17	0	41	8.13397	0	4.1	0	Random Only
'EX_ala-L(e)'	0.989084	0.0387174	1	1	0.99386	0.0218779	17	0	41	8.13397	0	4.1	0	Random Only
'EX_aldstrn(e)'	1	1	1	1	0.99976	0.00315174	0	0	1	0	0	0.1	0	Random Only
'EX_amp(e)'	1	1	1	1	0.99976	0.00315174	0	0	1	0	0	0.1	0	Random Only
'EX_andrstrn(e)'	1	1	1	1	0.99976	0.00315174	0	0	1	0	0	0.1	0	Random Only
'EX_andrstrnglc(e)'	1	1	1	1	0.99976	0.00315174	0	0	1	0	0	0.1	0	Random Only
'EX_aqcobal(e)'	1	1	1	1	0.99976	0.00315174	0	0	1	0	0	0.1	0	Random Only
'EX_arab-L(e)'	1	1	1	1	0.99976	0.00315174	0	0	1	0	0	0.1	0	Random Only
'EX_arach(e)'	1	1	1	1	0.99976	0.00315174	0	0	1	0	0	0.1	0	Random Only
'EX_arachd(e)'	1	1	1	1	0.99976	0.00315174	0	0	1	0	0	0.1	0	Random Only
'EX_arg-L(e)'	1	1	1	1	0.999067	0.00739872	0	0	9	0	0	0.9	0	Random Only
'EX_ascb-L(e)'	1	1	1	1	0.99976	0.00315174	0	0	1	0	0	0.1	0	Random Only
'EX_asn-L(e)'	0.979208	0.069581	1	1	0.99386	0.0218779	30	0	41	14.3541	0	4.1	0	Random Only
'EX_asp-D(e)'	1	1	1	1	0.99976	0.00315174	0	0	1	0	0	0.1	0	Random Only
'EX_asp-L(e)'	1	1	1	1	0.99976	0.00315174	0	0	1	0	0	0.1	0	Random Only
'EX_atp(e)'	1	1	1	1	0.99976	0.00315174	0	0	1	0	0	0.1	0	Random Only
'EX_avite1(e)'	1	1	1	1	0.99976	0.00315174	0	0	1	0	0	0.1	0	Random Only
'EX_avite2(e)'	1	1	1	1	0.99976	0.00315174	0	0	1	0	0	0.1	0	Random Only
'EX_bhb(e)'	0.993208	0.0566034	1	1	0.99976	0.00315174	3	0	1	1.43541	0	0.1	0	Random Only
'EX_bildglcur(e)'	1	1	1	1	0.99976	0.00315174	0	0	1	0	0	0.1	0	Random Only
'EX_bilglcur(e)'	1	1	1	1	0.99976	0.00315174	0	0	1	0	0	0.1	0	Random Only
'EX_bilirub(e)'	1	1	1	1	0.99976	0.00315174	0	0	1	0	0	0.1	0	Random Only
'EX_biocyt(e)'	1	1	1	1	0.99976	0.00315174	0	0	1	0	0	0.1	0	Random Only
'EX_btn(e)'	1	1	1	1	0.99976	0.00315174	0	0	1	0	0	0.1	0	Random Only
'EX_but(e)'	1	1	1	1	0.99976	0.00315174	0	0	1	0	0	0.1	0	Random Only
'EX_bvite(e)'	1	1	1	1	0.99976	0.00315174	0	0	1	0	0	0.1	0	Random Only
'EX_bz(e)'	1	1	1	1	0.99976	0.00315174	0	0	1	0	0	0.1	0	Random Only
'EX_ca2(e)'	1	1	1	1	0.99976	0.00315174	0	0	1	0	0	0.1	0	Random Only
'EX_camp(e)'	0.979208	0.069581	1	1	0.99402	0.0216394	30	0	40	14.3541	0	4	0	Random Only
'EX_cca_d3(e)'	1	1	1	1	0.99976	0.00315174	0	0	1	0	0	0.1	0	Random Only
'EX_cgly(e)'	0.91535	0.0759073	0.927523	0.00304404	0.860698	0.02913	174	5998	986	83.2536	99.9667	98.6	0	Both
'EX_chol(e)'	0.992904	0.0589403	1	1	0.999485	0.00451198	3	0	1	1.43541	0	0.1	0	Random Only
'EX_cholate(e)'	1	1	1	1	0.99976	0.00315174	0	0	1	0	0	0.1	0	Random Only
'EX_chsterol(e)'	0.993137	0.0570042	1	1	0.99976	0.00315174	3	0	1	1.43541	0	0.1	0	Random Only
'EX_chtn(e)'	1	1	1	1	0.99976	0.00315174	0	0	1	0	0	0.1	0	Random Only
'EX_cit(e)'	0.989735	0.0610552	1	1	0.99976	0.00315174	9	0	1	4.30622	0	0.1	0	Random Only
'EX_cl(e)'	1	1	1	1	0.99976	0.00315174	0	0	1	0	0	0.1	0	Random Only
'EX_cmp(e)'	1	1	1	1	0.99976	0.00315174	0	0	1	0	0	0.1	0	Random Only
'EX_co(e)'	1	1	1	1	0.99976	0.00315174	0	0	1	0	0	0.1	0	Random Only
'EX_co2(e)'	0.993011	0.0578087	1	1	0.99976	0.00315174	3	0	1	1.43541	0	0.1	0	Random Only
'EX_coumarin(e)'	1	1	1	1	0.99976	0.00315174	0	0	1	0	0	0.1	0	Random Only
'EX_creat(e)'	0.980379	0.0684882	1	1	0.99592	0.0160454	30	0	25	14.3541	0	2.5	0	Random Only
'EX_crmp_hs(e)'	0.994706	0.044898	1	1	0.999007	0.00827059	3	0	9	1.43541	0	0.9	0	Random Only
'EX_crn(e)'	1	1	1	1	0.99976	0.00315174	0	0	1	0	0	0.1	0	Random Only
'EX_crtsl(e)'	1	1	1	1	0.99976	0.00315174	0	0	1	0	0	0.1	0	Random Only
'EX_crtstrn(e)'	1	1	1	1	0.99976	0.00315174	0	0	1	0	0	0.1	0	Random Only
'EX_crvnc(e)'	1	1	1	1	0.99976	0.00315174	0	0	1	0	0	0.1	0	Random Only
'EX_csn(e)'	1	1	1	1	0.99976	0.00315174	0	0	1	0	0	0.1	0	Random Only
'EX_cspg_a(e)'	1	1	1	1	0.99976	0.00315174	0	0	1	0	0	0.1	0	Random Only
'EX_cspg_b(e)'	1	1	1	1	0.99976	0.00315174	0	0	1	0	0	0.1	0	Random Only
'EX_cspg_c(e)'	1	1	1	1	0.99976	0.00315174	0	0	1	0	0	0.1	0	Random Only
'EX_cspg_d(e)'	1	1	1	1	0.99976	0.00315174	0	0	1	0	0	0.1	0	Random Only
'EX_cspg_e(e)'	1	1	1	1	0.99976	0.00315174	0	0	1	0	0	0.1	0	Random Only
'EX_cyan(e)'	1	1	1	1	0.99976	0.00315174	0	0	1	0	0	0.1	0	Random Only
'EX_cys-L(e)'	0.91535	0.0759073	0.927523	0.00304404	0.860708	0.0291786	174	5998	986	83.2536	99.9667	98.6	0	Both
'EX_cytd(e)'	0.979208	0.069581	1	1	0.994314	0.0211863	30	0	39	14.3541	0	3.9	0	Random Only
'EX_dad-2(e)'	0.979208	0.069581	1	1	0.99386	0.0218779	30	0	41	14.3541	0	4.1	0	Random Only
'EX_dag_hs(e)'	0.995119	0.0427822	1	1	0.99976	0.00315174	3	0	1	1.43541	0	0.1	0	Random Only
'EX_dcsptn1(e)'	1	1	1	1	0.99976	0.00315174	0	0	1	0	0	0.1	0	Random Only
'EX_dcyt(e)'	0.979208	0.069581	1	1	0.994109	0.0215056	30	0	40	14.3541	0	4	0	Random Only
'EX_debrisoquine(e)'	1	1	1	1	0.99976	0.00315174	0	0	1	0	0	0.1	0	Random Only
'EX_dgchol(e)'	1	1	1	1	0.99976	0.00315174	0	0	1	0	0	0.1	0	Random Only
'EX_dgsn(e)'	0.979208	0.069581	1	1	0.99386	0.0218779	30	0	41	14.3541	0	4.1	0	Random Only
'EX_dhdascb(e)'	1	1	1	1	0.99976	0.00315174	0	0	1	0	0	0.1	0	Random Only
'EX_dheas(e)'	1	1	1	1	0.99976	0.00315174	0	0	1	0	0	0.1	0	Random Only
'EX_dhf(e)'	1	1	1	1	0.99976	0.00315174	0	0	1	0	0	0.1	0	Random Only
'EX_digalsgalside_hs(e)'	1	1	1	1	0.99976	0.00315174	0	0	1	0	0	0.1	0	Random Only
'EX_din(e)'	0.979208	0.069581	1	1	0.995171	0.0197801	30	0	31	14.3541	0	3.1	0	Random Only
'EX_dlnlcg(e)'	1	1	1	1	0.99976	0.00315174	0	0	1	0	0	0.1	0	Random Only
'EX_dmhptcrn(e)'	1	1	1	1	0.99976	0.00315174	0	0	1	0	0	0.1	0	Random Only
'EX_dopa(e)'	1	1	1	1	0.99976	0.00315174	0	0	1	0	0	0.1	0	Random Only
'EX_dopasf(e)'	1	1	1	1	0.99976	0.00315174	0	0	1	0	0	0.1	0	Random Only
'EX_drib(e)'	0.992994	0.0581923	1	1	0.99976	0.00315174	3	0	1	1.43541	0	0.1	0	Random Only
'EX_duri(e)'	0.979512	0.0695613	1	1	0.998511	0.0113639	30	0	12	14.3541	0	1.2	0	Random Only
'EX_eaflatoxin(e)'	1	1	1	1	0.99976	0.00315174	0	0	1	0	0	0.1	0	Random Only
'EX_ebastine(e)'	1	1	1	1	0.99976	0.00315174	0	0	1	0	0	0.1	0	Random Only
'EX_ebastineoh(e)'	1	1	1	1	0.99976	0.00315174	0	0	1	0	0	0.1	0	Random Only
'EX_eicostet(e)'	1	1	1	1	0.99976	0.00315174	0	0	1	0	0	0.1	0	Random Only
'EX_elaid(e)'	0.995212	0.0397898	1	1	0.99976	0.00315174	3	0	1	1.43541	0	0.1	0	Random Only
'EX_estradiol(e)'	1	1	1	1	0.99976	0.00315174	0	0	1	0	0	0.1	0	Random Only
'EX_estradiolglc(e)'	1	1	1	1	0.99976	0.00315174	0	0	1	0	0	0.1	0	Random Only
'EX_estriolglc(e)'	1	1	1	1	0.99976	0.00315174	0	0	1	0	0	0.1	0	Random Only
'EX_estroneglc(e)'	1	1	1	1	0.99976	0.00315174	0	0	1	0	0	0.1	0	Random Only
'EX_estrones(e)'	1	1	1	1	0.99976	0.00315174	0	0	1	0	0	0.1	0	Random Only
'EX_etoh(e)'	1	1	1	1	0.99976	0.00315174	0	0	1	0	0	0.1	0	Random Only
'EX_fe2(e)'	1	1	1	1	0.99976	0.00315174	0	0	1	0	0	0.1	0	Random Only
'EX_fol(e)'	1	1	1	1	0.99976	0.00315174	0	0	1	0	0	0.1	0	Random Only
'EX_for(e)'	0.99307	0.0575618	1	1	0.99976	0.00315174	3	0	1	1.43541	0	0.1	0	Random Only
'EX_fru(e)'	0.992902	0.0589565	1	1	0.99976	0.00315174	3	0	1	1.43541	0	0.1	0	Random Only
'EX_fuc-L(e)'	1	1	1	1	0.99976	0.00315174	0	0	1	0	0	0.1	0	Random Only
'EX_fuc13galacglcgal14acglcgalgluside_hs(e)'	1	1	1	1	0.99976	0.00315174	0	0	1	0	0	0.1	0	Random Only
'EX_fuc14galacglcgalgluside_hs(e)'	1	1	1	1	0.99976	0.00315174	0	0	1	0	0	0.1	0	Random Only
'EX_fucacgalfucgalacglcgalgluside_hs(e)'	1	1	1	1	0.99976	0.00315174	0	0	1	0	0	0.1	0	Random Only
'EX_fucacngal14acglcgalgluside_hs(e)'	1	1	1	1	0.99976	0.00315174	0	0	1	0	0	0.1	0	Random Only
'EX_fucacngalacglcgalgluside_hs(e)'	1	1	1	1	0.99976	0.00315174	0	0	1	0	0	0.1	0	Random Only
'EX_fucfuc12gal14acglcgalgluside_hs(e)'	1	1	1	1	0.99976	0.00315174	0	0	1	0	0	0.1	0	Random Only
'EX_fucfuc132galacglcgal14acglcgalgluside_hs(e)'	1	1	1	1	0.99976	0.00315174	0	0	1	0	0	0.1	0	Random Only
'EX_fucfucfucgalacglc13galacglcgal14acglcgalgluside_hs(e)'	1	1	1	1	0.99976	0.00315174	0	0	1	0	0	0.1	0	Random Only
'EX_fucfucfucgalacglcgal14acglcgalgluside_hs(e)'	1	1	1	1	0.99976	0.00315174	0	0	1	0	0	0.1	0	Random Only
'EX_fucfucgalacglcgalgluside_hs(e)'	1	1	1	1	0.99976	0.00315174	0	0	1	0	0	0.1	0	Random Only
'EX_fucgal14acglcgalgluside_hs(e)'	1	1	1	1	0.99976	0.00315174	0	0	1	0	0	0.1	0	Random Only
'EX_fucgalfucgalacglcgalgluside_hs(e)'	1	1	1	1	0.99976	0.00315174	0	0	1	0	0	0.1	0	Random Only
'EX_fucgalgbside_hs(e)'	1	1	1	1	0.99976	0.00315174	0	0	1	0	0	0.1	0	Random Only
'EX_gal(e)'	0.99348	0.0541586	1	1	0.99976	0.00315174	3	0	1	1.43541	0	0.1	0	Random Only
'EX_galacglcgalgbside_hs(e)'	1	1	1	1	0.99976	0.00315174	0	0	1	0	0	0.1	0	Random Only
'EX_galfuc12gal14acglcgalgluside_hs(e)'	1	1	1	1	0.99976	0.00315174	0	0	1	0	0	0.1	0	Random Only
'EX_galfucgalacglcgal14acglcgalgluside_hs(e)'	1	1	1	1	0.99976	0.00315174	0	0	1	0	0	0.1	0	Random Only
'EX_galgalfucfucgalacglcgalacglcgal14acglcgalgluside_hs(e)'	1	1	1	1	0.99976	0.00315174	0	0	1	0	0	0.1	0	Random Only
'EX_galgalgalthcrm_hs(e)'	1	1	1	1	0.99976	0.00315174	0	0	1	0	0	0.1	0	Random Only
'EX_gam(e)'	1	1	1	1	0.99976	0.00315174	0	0	1	0	0	0.1	0	Random Only
'EX_gbside_hs(e)'	1	1	1	1	0.99976	0.00315174	0	0	1	0	0	0.1	0	Random Only
'EX_gchola(e)'	1	1	1	1	0.99976	0.00315174	0	0	1	0	0	0.1	0	Random Only
'EX_gd1b2_hs(e)'	1	1	1	1	0.99976	0.00315174	0	0	1	0	0	0.1	0	Random Only
'EX_gd1c_hs(e)'	1	1	1	1	0.99976	0.00315174	0	0	1	0	0	0.1	0	Random Only
'EX_gdchola(e)'	1	1	1	1	0.99976	0.00315174	0	0	1	0	0	0.1	0	Random Only
'EX_gdp(e)'	1	1	1	1	0.99976	0.00315174	0	0	1	0	0	0.1	0	Random Only
'EX_glc(e)'	0.992902	0.0589565	1	1	0.99976	0.00315174	3	0	1	1.43541	0	0.1	0	Random Only
'EX_gln-L(e)'	0.979208	0.069581	1	1	0.99386	0.0218779	30	0	41	14.3541	0	4.1	0	Random Only
'EX_glu-L(e)'	0.979208	0.069581	1	1	0.99386	0.0218779	30	0	41	14.3541	0	4.1	0	Random Only
'EX_gluala(e)'	0.979208	0.069581	1	1	0.99386	0.0218779	30	0	41	14.3541	0	4.1	0	Random Only
'EX_gly(e)'	0.979208	0.069581	1	1	0.99386	0.0218779	30	0	41	14.3541	0	4.1	0	Random Only
'EX_glyb(e)'	0.992837	0.0594966	1	1	0.999507	0.0043532	3	0	1	1.43541	0	0.1	0	Random Only
'EX_glyc(e)'	0.99475	0.0436076	1	1	0.99976	0.00315174	3	0	1	1.43541	0	0.1	0	Random Only
'EX_glyc-S(e)'	1	1	1	1	0.99976	0.00315174	0	0	1	0	0	0.1	0	Random Only
'EX_glygn2(e)'	1	1	1	1	0.99976	0.00315174	0	0	1	0	0	0.1	0	Random Only
'EX_glygn4(e)'	1	1	1	1	0.99976	0.00315174	0	0	1	0	0	0.1	0	Random Only
'EX_glygn5(e)'	1	1	1	1	0.99976	0.00315174	0	0	1	0	0	0.1	0	Random Only
'EX_gmp(e)'	1	1	1	1	0.99976	0.00315174	0	0	1	0	0	0.1	0	Random Only
'EX_gp1c_hs(e)'	1	1	1	1	0.99976	0.00315174	0	0	1	0	0	0.1	0	Random Only
'EX_gp1calpha_hs(e)'	1	1	1	1	0.99976	0.00315174	0	0	1	0	0	0.1	0	Random Only
'EX_gq1b_hs(e)'	1	1	1	1	0.99976	0.00315174	0	0	1	0	0	0.1	0	Random Only
'EX_gq1balpha_hs(e)'	1	1	1	1	0.99976	0.00315174	0	0	1	0	0	0.1	0	Random Only
'EX_gsn(e)'	0.979208	0.069581	1	1	0.99386	0.0218779	30	0	41	14.3541	0	4.1	0	Random Only
'EX_gt1a_hs(e)'	1	1	1	1	0.99976	0.00315174	0	0	1	0	0	0.1	0	Random Only
'EX_gthox(e)'	1	1	1	1	0.99976	0.00315174	0	0	1	0	0	0.1	0	Random Only
'EX_gthrd(e)'	1	1	1	1	0.99976	0.00315174	0	0	1	0	0	0.1	0	Random Only
'EX_gtp(e)'	1	1	1	1	0.99976	0.00315174	0	0	1	0	0	0.1	0	Random Only
'EX_gua(e)'	0.979208	0.069581	1	1	0.99386	0.0218779	30	0	41	14.3541	0	4.1	0	Random Only
'EX_h(e)'	0.991015	0.0558941	1	1	0.99976	0.00315174	7	0	1	3.34928	0	0.1	0	Random Only
'EX_h2o(e)'	0.992875	0.05918	1	1	0.99976	0.00315174	3	0	1	1.43541	0	0.1	0	Random Only
'EX_h2o2(e)'	0.992823	0.0596155	1	1	0.99976	0.00315174	3	0	1	1.43541	0	0.1	0	Random Only
'EX_ha(e)'	0.993577	0.053351	1	1	0.999403	0.00516919	3	0	6	1.43541	0	0.6	0	Random Only
'EX_ha_pre1(e)'	0.993577	0.053351	1	1	0.999403	0.00516919	3	0	6	1.43541	0	0.6	0	Random Only
'EX_hco3(e)'	0.993011	0.0578087	1	1	0.99976	0.00315174	3	0	1	1.43541	0	0.1	0	Random Only
'EX_hcoumarin(e)'	1	1	1	1	0.99976	0.00315174	0	0	1	0	0	0.1	0	Random Only
'EX_hdca(e)'	0.994036	0.0461249	1	1	0.99967	0.00337093	3	0	1	1.43541	0	0.1	0	Random Only
'EX_hdcea(e)'	0.994946	0.0421443	1	1	0.99976	0.00315174	3	0	1	1.43541	0	0.1	0	Random Only
'EX_hestratriol(e)'	1	1	1	1	0.99976	0.00315174	0	0	1	0	0	0.1	0	Random Only
'EX_hexc(e)'	1	1	1	1	0.99976	0.00315174	0	0	1	0	0	0.1	0	Random Only
'EX_his-L(e)'	0.991049	0.0601875	1	1	0.966266	0.0490037	8	0	280	3.82775	0	28	0	Random Only
'EX_hista(e)'	0.991049	0.0601875	1	1	0.966266	0.0490037	8	0	280	3.82775	0	28	0	Random Only
'EX_hom-L(e)'	1	1	1	1	0.99976	0.00315174	0	0	1	0	0	0.1	0	Random Only
'EX_hpdca(e)'	1	1	1	1	0.99976	0.00315174	0	0	1	0	0	0.1	0	Random Only
'EX_hspg(e)'	1	1	1	1	0.99976	0.00315174	0	0	1	0	0	0.1	0	Random Only
'EX_hxan(e)'	0.979208	0.069581	1	1	0.99386	0.0218779	30	0	41	14.3541	0	4.1	0	Random Only
'EX_i(e)'	1	1	1	1	0.99976	0.00315174	0	0	1	0	0	0.1	0	Random Only
'EX_idp(e)'	1	1	1	1	0.99976	0.00315174	0	0	1	0	0	0.1	0	Random Only
'EX_ile-L(e)'	0.865023	0.278251	0.979157	0.0802987	0.335314	0.457513	67	40	771	32.0574	0.666667	77.1	1	Both
'EX_imp(e)'	1	1	1	1	0.99976	0.00315174	0	0	1	0	0	0.1	0	Random Only
'EX_inost(e)'	0.992898	0.0589941	1	1	0.99976	0.00315174	3	0	1	1.43541	0	0.1	0	Random Only
'EX_ins(e)'	0.979208	0.069581	1	1	0.99386	0.0218779	30	0	41	14.3541	0	4.1	0	Random Only
'EX_k(e)'	1	1	1	1	0.99976	0.00315174	0	0	1	0	0	0.1	0	Random Only
'EX_ksi(e)'	1	1	1	1	0.99976	0.00315174	0	0	1	0	0	0.1	0	Random Only
'EX_ksi_deg1(e)'	1	1	1	1	0.99976	0.00315174	0	0	1	0	0	0.1	0	Random Only
'EX_ksii_core2(e)'	1	1	1	1	0.99976	0.00315174	0	0	1	0	0	0.1	0	Random Only
'EX_ksii_core4(e)'	1	1	1	1	0.99976	0.00315174	0	0	1	0	0	0.1	0	Random Only
'EX_lac-D(e)'	0.993115	0.0571889	1	1	0.99976	0.00315174	3	0	1	1.43541	0	0.1	0	Random Only
'EX_lac-L(e)'	0.992804	0.0593997	1	1	0.99976	0.00315174	3	0	1	1.43541	0	0.1	0	Random Only
'EX_lcts(e)'	0.993563	0.0534706	1	1	0.99976	0.00315174	3	0	1	1.43541	0	0.1	0	Random Only
'EX_leu-L(e)'	0.99032	0.0606887	1	1	0.999562	0.00399674	5	0	1	2.39234	0	0.1	0	Random Only
'EX_leuktrA4(e)'	1	1	1	1	0.99976	0.00315174	0	0	1	0	0	0.1	0	Random Only
'EX_leuktrB4(e)'	1	1	1	1	0.99976	0.00315174	0	0	1	0	0	0.1	0	Random Only
'EX_leuktrC4(e)'	1	1	1	1	0.99976	0.00315174	0	0	1	0	0	0.1	0	Random Only
'EX_leuktrD4(e)'	1	1	1	1	0.99976	0.00315174	0	0	1	0	0	0.1	0	Random Only
'EX_leuktrE4(e)'	1	1	1	1	0.99976	0.00315174	0	0	1	0	0	0.1	0	Random Only
'EX_leuktrF4(e)'	1	1	1	1	0.99976	0.00315174	0	0	1	0	0	0.1	0	Random Only
'EX_lgnc(e)'	1	1	1	1	0.99976	0.00315174	0	0	1	0	0	0.1	0	Random Only
'EX_lipoate(e)'	1	1	1	1	0.99976	0.00315174	0	0	1	0	0	0.1	0	Random Only
'EX_lneldc(e)'	0.995693	0.0390688	1	1	0.99976	0.00315174	3	0	1	1.43541	0	0.1	0	Random Only
'EX_lnlc(e)'	1	1	1	1	0.99976	0.00315174	0	0	1	0	0	0.1	0	Random Only
'EX_lnlnca(e)'	1	1	1	1	0.99976	0.00315174	0	0	1	0	0	0.1	0	Random Only
'EX_lnlncg(e)'	1	1	1	1	0.99976	0.00315174	0	0	1	0	0	0.1	0	Random Only
'EX_lpchol_hs(e)'	0.992847	0.059415	1	1	0.999603	0.00375608	3	0	1	1.43541	0	0.1	0	Random Only
'EX_lys-L(e)'	0.159994	0.350311	0	0	0.000987721	0.0312345	192	6000	999	91.866	100	99.9	1	Both
'EX_mag_hs(e)'	0.994971	0.0418351	1	1	0.99976	0.00315174	3	0	1	1.43541	0	0.1	0	Random Only
'EX_malt(e)'	1	1	1	1	0.99976	0.00315174	0	0	1	0	0	0.1	0	Random Only
'EX_man(e)'	0.993509	0.0539205	1	1	0.99976	0.00315174	3	0	1	1.43541	0	0.1	0	Random Only
'EX_meoh(e)'	0.99314	0.0569797	1	1	0.99976	0.00315174	3	0	1	1.43541	0	0.1	0	Random Only
'EX_mepi(e)'	1	1	1	1	0.99976	0.00315174	0	0	1	0	0	0.1	0	Random Only
'EX_mercplaccys(e)'	0.913308	0.0750858	0.927523	0.00304404	0.860654	0.0290957	178	5998	986	85.1675	99.9667	98.6	0	Both
'EX_met-L(e)'	0.903437	0.0779607	0.927523	0.00304404	0.860712	0.0291952	188	5998	986	89.9522	99.9667	98.6	0	Both
'EX_mthgxl(e)'	0.993115	0.0571889	1	1	0.99976	0.00315174	3	0	1	1.43541	0	0.1	0	Random Only
'EX_n2m2nmasn(e)'	1	1	1	1	0.99976	0.00315174	0	0	1	0	0	0.1	0	Random Only
'EX_na1(e)'	1	1	1	1	0.99976	0.00315174	0	0	1	0	0	0.1	0	Random Only
'EX_nac(e)'	1	1	1	1	0.99976	0.00315174	0	0	1	0	0	0.1	0	Random Only
'EX_nad(e)'	1	1	1	1	0.99976	0.00315174	0	0	1	0	0	0.1	0	Random Only
'EX_nadp(e)'	1	1	1	1	0.99976	0.00315174	0	0	1	0	0	0.1	0	Random Only
'EX_ncam(e)'	1	1	1	1	0.99976	0.00315174	0	0	1	0	0	0.1	0	Random Only
'EX_nh4(e)'	0.978283	0.0698508	1	1	0.99386	0.0218779	32	0	41	15.311	0	4.1	0	Random Only
'EX_no(e)'	0.996473	0.0292928	1	1	0.999367	0.00548064	3	0	6	1.43541	0	0.6	0	Random Only
'EX_npthl(e)'	1	1	1	1	0.99976	0.00315174	0	0	1	0	0	0.1	0	Random Only
'EX_nrpphr(e)'	1	1	1	1	0.99976	0.00315174	0	0	1	0	0	0.1	0	Random Only
'EX_nrpphrsf(e)'	1	1	1	1	0.99976	0.00315174	0	0	1	0	0	0.1	0	Random Only
'EX_nrvnc(e)'	1	1	1	1	0.99976	0.00315174	0	0	1	0	0	0.1	0	Random Only
'EX_o2(e)'	0.998935	0.00884423	1	1	0.99976	0.00315174	3	0	1	1.43541	0	0.1	0	Random Only
'EX_o2s(e)'	0.992823	0.0596155	1	1	0.99976	0.00315174	3	0	1	1.43541	0	0.1	0	Random Only
'EX_oagd3_hs(e)'	1	1	1	1	0.99976	0.00315174	0	0	1	0	0	0.1	0	Random Only
'EX_oagt3_hs(e)'	1	1	1	1	0.99976	0.00315174	0	0	1	0	0	0.1	0	Random Only
'EX_ocdca(e)'	1	1	1	1	0.99976	0.00315174	0	0	1	0	0	0.1	0	Random Only
'EX_ocdcea(e)'	1	1	1	1	0.99976	0.00315174	0	0	1	0	0	0.1	0	Random Only
'EX_octa(e)'	1	1	1	1	0.99976	0.00315174	0	0	1	0	0	0.1	0	Random Only
'EX_oh1'	1	1	1	1	0.99976	0.00315174	0	0	1	0	0	0.1	0	Random Only
'EX_onpthl(e)'	1	1	1	1	0.99976	0.00315174	0	0	1	0	0	0.1	0	Random Only
'EX_orn(e)'	1	1	1	1	0.99976	0.00315174	0	0	1	0	0	0.1	0	Random Only
'EX_oxa(e)'	1	1	1	1	0.99976	0.00315174	0	0	1	0	0	0.1	0	Random Only
'EX_paf_hs(e)'	1	1	1	1	0.99976	0.00315174	0	0	1	0	0	0.1	0	Random Only
'EX_pchol_hs(e)'	0.99367	0.0535044	1	1	0.999628	0.00359398	3	0	1	1.43541	0	0.1	0	Random Only
'EX_pe_hs(e)'	0.994351	0.0472516	1	1	0.999371	0.00544347	3	0	6	1.43541	0	0.6	0	Random Only
'EX_peplys(e)'	1	1	1	1	0.99976	0.00315174	0	0	1	0	0	0.1	0	Random Only
'EX_pglyc_hs(e)'	0.993994	0.0500227	1	1	0.99976	0.00315174	3	0	1	1.43541	0	0.1	0	Random Only
'EX_phe-L(e)'	0.992205	0.0598818	1	1	0.99976	0.00315174	5	0	1	2.39234	0	0.1	0	Random Only
'EX_pheme(e)'	1	1	1	1	0.99976	0.00315174	0	0	1	0	0	0.1	0	Random Only
'EX_phyQ(e)'	1	1	1	1	0.99976	0.00315174	0	0	1	0	0	0.1	0	Random Only
'EX_phyt(e)'	1	1	1	1	0.99976	0.00315174	0	0	1	0	0	0.1	0	Random Only
'EX_pi(e)'	0.760432	0.0505029	0.776179	0.00122232	0.831135	0.0879339	209	6000	899	100	100	89.9	1	Both
'EX_pnto-R(e)'	1	1	1	1	0.99976	0.00315174	0	0	1	0	0	0.1	0	Random Only
'EX_ppa(e)'	1	1	1	1	0.99976	0.00315174	0	0	1	0	0	0.1	0	Random Only
'EX_prgstrn(e)'	1	1	1	1	0.99976	0.00315174	0	0	1	0	0	0.1	0	Random Only
'EX_pro-D(e)'	1	1	1	1	0.99976	0.00315174	0	0	1	0	0	0.1	0	Random Only
'EX_pro-L(e)'	0.979208	0.069581	1	1	0.99386	0.0218779	30	0	41	14.3541	0	4.1	0	Random Only
'EX_prostgd2(e)'	1	1	1	1	0.99976	0.00315174	0	0	1	0	0	0.1	0	Random Only
'EX_prostge1(e)'	1	1	1	1	0.99976	0.00315174	0	0	1	0	0	0.1	0	Random Only
'EX_prostge2(e)'	1	1	1	1	0.99976	0.00315174	0	0	1	0	0	0.1	0	Random Only
'EX_prostgf2(e)'	1	1	1	1	0.99976	0.00315174	0	0	1	0	0	0.1	0	Random Only
'EX_ps_hs(e)'	0.994552	0.0457594	1	1	0.999327	0.00581004	3	0	6	1.43541	0	0.6	0	Random Only
'EX_ptdca(e)'	1	1	1	1	0.99976	0.00315174	0	0	1	0	0	0.1	0	Random Only
'EX_pydam(e)'	1	1	1	1	0.99976	0.00315174	0	0	1	0	0	0.1	0	Random Only
'EX_pydx(e)'	1	1	1	1	0.99976	0.00315174	0	0	1	0	0	0.1	0	Random Only
'EX_pydxn(e)'	1	1	1	1	0.99976	0.00315174	0	0	1	0	0	0.1	0	Random Only
'EX_pyr(e)'	0.992823	0.0596155	1	1	0.99976	0.00315174	3	0	1	1.43541	0	0.1	0	Random Only
'EX_retfa(e)'	1	1	1	1	0.99976	0.00315174	0	0	1	0	0	0.1	0	Random Only
'EX_retinol(e)'	1	1	1	1	0.99976	0.00315174	0	0	1	0	0	0.1	0	Random Only
'EX_retinol-9-cis(e)'	1	1	1	1	0.99976	0.00315174	0	0	1	0	0	0.1	0	Random Only
'EX_retinol-cis-11(e)'	1	1	1	1	0.99976	0.00315174	0	0	1	0	0	0.1	0	Random Only
'EX_retn(e)'	1	1	1	1	0.99976	0.00315174	0	0	1	0	0	0.1	0	Random Only
'EX_retnglc(e)'	1	1	1	1	0.99976	0.00315174	0	0	1	0	0	0.1	0	Random Only
'EX_retpalm(e)'	1	1	1	1	0.99976	0.00315174	0	0	1	0	0	0.1	0	Random Only
'EX_rib-D(e)'	1	1	1	1	0.99976	0.00315174	0	0	1	0	0	0.1	0	Random Only
'EX_ribflv(e)'	1	1	1	1	0.99976	0.00315174	0	0	1	0	0	0.1	0	Random Only
'EX_s2l2fn2m2masn(e)'	1	1	1	1	0.99976	0.00315174	0	0	1	0	0	0.1	0	Random Only
'EX_s2l2n2m2masn(e)'	1	1	1	1	0.99976	0.00315174	0	0	1	0	0	0.1	0	Random Only
'EX_sarcs(e)'	1	1	1	1	0.99976	0.00315174	0	0	1	0	0	0.1	0	Random Only
'EX_sel(e)'	1	1	1	1	0.99976	0.00315174	0	0	1	0	0	0.1	0	Random Only
'EX_ser-D(e)'	1	1	1	1	0.99976	0.00315174	0	0	1	0	0	0.1	0	Random Only
'EX_ser-L(e)'	0.979208	0.069581	1	1	0.99386	0.0218779	30	0	41	14.3541	0	4.1	0	Random Only
'EX_sl-L(e)'	1	1	1	1	0.99976	0.00315174	0	0	1	0	0	0.1	0	Random Only
'EX_so4(e)'	0.992823	0.0596155	1	1	0.99976	0.00315174	3	0	1	1.43541	0	0.1	0	Random Only
'EX_spc_hs(e)'	0.992968	0.0584185	1	1	0.999363	0.00549221	3	0	6	1.43541	0	0.6	0	Random Only
'EX_sph1p(e)'	0.984321	0.0505819	1	1	0.998103	0.0131878	26	0	13	12.4402	0	1.3	0	Random Only
'EX_sphs1p(e)'	0.990075	0.0504741	1	1	0.999007	0.00827059	12	0	9	5.74163	0	0.9	0	Random Only
'EX_srtn(e)'	0.901471	0.0750717	0.913107	0.00448488	0.752874	0.0652703	177	6000	995	84.689	100	99.5	1	Both
'EX_strch1(e)'	1	1	1	1	0.99976	0.00315174	0	0	1	0	0	0.1	0	Random Only
'EX_strch2(e)'	1	1	1	1	0.99976	0.00315174	0	0	1	0	0	0.1	0	Random Only
'EX_strdnc(e)'	1	1	1	1	0.99976	0.00315174	0	0	1	0	0	0.1	0	Random Only
'EX_succ(e)'	0.989735	0.0610552	1	1	0.999725	0.00320194	9	0	1	4.30622	0	0.1	0	Random Only
'EX_tag_hs(e)'	0.995366	0.041402	1	1	0.99976	0.00315174	3	0	1	1.43541	0	0.1	0	Random Only
'EX_tagat-D(e)'	1	1	1	1	0.99976	0.00315174	0	0	1	0	0	0.1	0	Random Only
'EX_taur(e)'	0.915677	0.0761058	0.927523	0.00304404	0.860708	0.0291786	173	5998	986	82.7751	99.9667	98.6	0	Both
'EX_tchola(e)'	1	1	1	1	0.99976	0.00315174	0	0	1	0	0	0.1	0	Random Only
'EX_tcynt(e)'	1	1	1	1	0.99976	0.00315174	0	0	1	0	0	0.1	0	Random Only
'EX_tdchola(e)'	1	1	1	1	0.99976	0.00315174	0	0	1	0	0	0.1	0	Random Only
'EX_tethex3(e)'	1	1	1	1	0.99976	0.00315174	0	0	1	0	0	0.1	0	Random Only
'EX_tetpent3(e)'	1	1	1	1	0.99976	0.00315174	0	0	1	0	0	0.1	0	Random Only
'EX_tetpent6(e)'	1	1	1	1	0.99976	0.00315174	0	0	1	0	0	0.1	0	Random Only
'EX_tettet6(e)'	1	1	1	1	0.99976	0.00315174	0	0	1	0	0	0.1	0	Random Only
'EX_thf(e)'	1	1	1	1	0.99976	0.00315174	0	0	1	0	0	0.1	0	Random Only
'EX_thm(e)'	1	1	1	1	0.99976	0.00315174	0	0	1	0	0	0.1	0	Random Only
'EX_thmmp(e)'	1	1	1	1	0.99976	0.00315174	0	0	1	0	0	0.1	0	Random Only
'EX_thmtp(e)'	1	1	1	1	0.99976	0.00315174	0	0	1	0	0	0.1	0	Random Only
'EX_thr-L(e)'	0.900691	0.0757308	0.909875	5.32942e-14	0.969307	0.0392635	174	6000	323	83.2536	100	32.3	1	Both
'EX_thym(e)'	0.979208	0.069581	1	1	0.996546	0.0171974	30	0	20	14.3541	0	2	0	Random Only
'EX_thymd(e)'	1	1	1	1	0.99976	0.00315174	0	0	1	0	0	0.1	0	Random Only
'EX_thyox-L(e)'	1	1	1	1	0.99976	0.00315174	0	0	1	0	0	0.1	0	Random Only
'EX_tmndnc(e)'	1	1	1	1	0.99976	0.00315174	0	0	1	0	0	0.1	0	Random Only
'EX_tre(e)'	1	1	1	1	0.99976	0.00315174	0	0	1	0	0	0.1	0	Random Only
'EX_triodthy(e)'	1	1	1	1	0.99976	0.00315174	0	0	1	0	0	0.1	0	Random Only
'EX_triodthysuf(e)'	1	1	1	1	0.99976	0.00315174	0	0	1	0	0	0.1	0	Random Only
'EX_trp-L(e)'	0.888824	0.0755147	0.913107	0.00448488	0.752874	0.0652703	191	6000	995	91.3876	100	99.5	1	Both
'EX_tststerone(e)'	1	1	1	1	0.99976	0.00315174	0	0	1	0	0	0.1	0	Random Only
'EX_tststeroneglc(e)'	1	1	1	1	0.99976	0.00315174	0	0	1	0	0	0.1	0	Random Only
'EX_tsul(e)'	1	1	1	1	0.99976	0.00315174	0	0	1	0	0	0.1	0	Random Only
'EX_ttdca(e)'	1	1	1	1	0.99976	0.00315174	0	0	1	0	0	0.1	0	Random Only
'EX_txa2(e)'	1	1	1	1	0.99976	0.00315174	0	0	1	0	0	0.1	0	Random Only
'EX_tymsf(e)'	0.992823	0.0596155	1	1	0.99976	0.00315174	3	0	1	1.43541	0	0.1	0	Random Only
'EX_tyr-L(e)'	0.992823	0.0596155	1	1	0.99976	0.00315174	3	0	1	1.43541	0	0.1	0	Random Only
'EX_udp(e)'	1	1	1	1	0.99976	0.00315174	0	0	1	0	0	0.1	0	Random Only
'EX_ump(e)'	1	1	1	1	0.99976	0.00315174	0	0	1	0	0	0.1	0	Random Only
'EX_ura(e)'	0.979208	0.069581	1	1	0.993887	0.021837	30	0	41	14.3541	0	4.1	0	Random Only
'EX_urate(e)'	1	1	1	1	0.99976	0.00315174	0	0	1	0	0	0.1	0	Random Only
'EX_urea(e)'	0.980327	0.0684939	1	1	0.995386	0.0188422	30	0	27	14.3541	0	2.7	0	Random Only
'EX_uri(e)'	0.979284	0.0695888	1	1	0.998151	0.013023	30	0	13	14.3541	0	1.3	0	Random Only
'EX_utp(e)'	1	1	1	1	0.99976	0.00315174	0	0	1	0	0	0.1	0	Random Only
'EX_vacc(e)'	0.995212	0.0397898	1	1	0.99976	0.00315174	3	0	1	1.43541	0	0.1	0	Random Only
'EX_val-L(e)'	0.984834	0.0657108	1	1	0.999687	0.00344935	16	0	1	7.6555	0	0.1	0	Random Only
'EX_vitd2(e)'	1	1	1	1	0.99976	0.00315174	0	0	1	0	0	0.1	0	Random Only
'EX_vitd3(e)'	0.99314	0.0569797	1	1	0.99976	0.00315174	3	0	1	1.43541	0	0.1	0	Random Only
'EX_xolest_hs(e)'	0.993085	0.0574363	1	1	0.99976	0.00315174	3	0	1	1.43541	0	0.1	0	Random Only
'EX_xoltri24(e)'	1	1	1	1	0.99976	0.00315174	0	0	1	0	0	0.1	0	Random Only
'EX_xoltri25(e)'	1	1	1	1	0.99976	0.00315174	0	0	1	0	0	0.1	0	Random Only
'EX_xoltri27(e)'	0.993205	0.0564421	1	1	0.99976	0.00315174	3	0	1	1.43541	0	0.1	0	Random Only
'EX_xylt(e)'	0.993295	0.0556941	1	1	0.99976	0.00315174	3	0	1	1.43541	0	0.1	0	Random Only
'EX_yvite(e)'	1	1	1	1	0.99976	0.00315174	0	0	1	0	0	0.1	0	Random Only
'F1Atg'	1	1	1	1	0.99976	0.00315174	0	0	1	0	0	0.1	0	Random Only
'F1PGT'	1	1	1	1	0.99976	0.00315174	0	0	1	0	0	0.1	0	Random Only
'F6Tg'	1	1	1	1	0.99976	0.00315174	0	0	1	0	0	0.1	0	Random Only
'FACOAL140i'	1	1	1	1	0.99976	0.00315174	0	0	1	0	0	0.1	0	Random Only
'FACOAL150'	1	1	1	1	0.99976	0.00315174	0	0	1	0	0	0.1	0	Random Only
'FACOAL160i'	0.991324	0.0585386	1	1	0.99965	0.00346599	3	0	1	1.43541	0	0.1	0	Random Only
'FACOAL161'	0.994946	0.0421443	1	1	0.99976	0.00315174	3	0	1	1.43541	0	0.1	0	Random Only
'FACOAL170'	1	1	1	1	0.99976	0.00315174	0	0	1	0	0	0.1	0	Random Only
'FACOAL180i'	1	1	1	1	0.99976	0.00315174	0	0	1	0	0	0.1	0	Random Only
'FACOAL1812'	0.995212	0.0397898	1	1	0.99976	0.00315174	3	0	1	1.43541	0	0.1	0	Random Only
'FACOAL1813'	0.995212	0.0397898	1	1	0.99976	0.00315174	3	0	1	1.43541	0	0.1	0	Random Only
'FACOAL181i'	1	1	1	1	0.99976	0.00315174	0	0	1	0	0	0.1	0	Random Only
'FACOAL1821'	1	1	1	1	0.99976	0.00315174	0	0	1	0	0	0.1	0	Random Only
'FACOAL1822'	0.995693	0.0390688	1	1	0.99976	0.00315174	3	0	1	1.43541	0	0.1	0	Random Only
'FACOAL1831'	1	1	1	1	0.99976	0.00315174	0	0	1	0	0	0.1	0	Random Only
'FACOAL1832'	1	1	1	1	0.99976	0.00315174	0	0	1	0	0	0.1	0	Random Only
'FACOAL184'	1	1	1	1	0.99976	0.00315174	0	0	1	0	0	0.1	0	Random Only
'FACOAL191'	0.992823	0.0596155	1	1	0.99976	0.00315174	3	0	1	1.43541	0	0.1	0	Random Only
'FACOAL200'	1	1	1	1	0.99976	0.00315174	0	0	1	0	0	0.1	0	Random Only
'FACOAL203'	1	1	1	1	0.99976	0.00315174	0	0	1	0	0	0.1	0	Random Only
'FACOAL204'	1	1	1	1	0.99976	0.00315174	0	0	1	0	0	0.1	0	Random Only
'FACOAL2042'	1	1	1	1	0.99976	0.00315174	0	0	1	0	0	0.1	0	Random Only
'FACOAL204i'	1	1	1	1	0.99976	0.00315174	0	0	1	0	0	0.1	0	Random Only
'FACOAL205'	1	1	1	1	0.99976	0.00315174	0	0	1	0	0	0.1	0	Random Only
'FACOAL206'	1	1	1	1	0.99976	0.00315174	0	0	1	0	0	0.1	0	Random Only
'FACOAL224'	1	1	1	1	0.99976	0.00315174	0	0	1	0	0	0.1	0	Random Only
'FACOAL2251'	1	1	1	1	0.99976	0.00315174	0	0	1	0	0	0.1	0	Random Only
'FACOAL2252'	1	1	1	1	0.99976	0.00315174	0	0	1	0	0	0.1	0	Random Only
'FACOAL226'	1	1	1	1	0.99976	0.00315174	0	0	1	0	0	0.1	0	Random Only
'FACOAL226i'	1	1	1	1	0.99976	0.00315174	0	0	1	0	0	0.1	0	Random Only
'FACOAL240'	1	1	1	1	0.99976	0.00315174	0	0	1	0	0	0.1	0	Random Only
'FACOAL241'	1	1	1	1	0.99976	0.00315174	0	0	1	0	0	0.1	0	Random Only
'FACOAL244_1'	1	1	1	1	0.99976	0.00315174	0	0	1	0	0	0.1	0	Random Only
'FACOAL245_1'	1	1	1	1	0.99976	0.00315174	0	0	1	0	0	0.1	0	Random Only
'FACOAL245_2'	1	1	1	1	0.99976	0.00315174	0	0	1	0	0	0.1	0	Random Only
'FACOAL246_1'	1	1	1	1	0.99976	0.00315174	0	0	1	0	0	0.1	0	Random Only
'FACOAL260'	1	1	1	1	0.99976	0.00315174	0	0	1	0	0	0.1	0	Random Only
'FACOAL80i'	1	1	1	1	0.99976	0.00315174	0	0	1	0	0	0.1	0	Random Only
'FADH2tru'	0.99314	0.0569797	1	1	0.99976	0.00315174	3	0	1	1.43541	0	0.1	0	Random Only
'FADH2tx'	1	1	1	1	0.99976	0.00315174	0	0	1	0	0	0.1	0	Random Only
'FADtru'	0.99314	0.0569797	1	1	0.99976	0.00315174	3	0	1	1.43541	0	0.1	0	Random Only
'FADtx'	1	1	1	1	0.99976	0.00315174	0	0	1	0	0	0.1	0	Random Only
'FALDH'	0.99314	0.0569797	1	1	0.99976	0.00315174	3	0	1	1.43541	0	0.1	0	Random Only
'FALDtly'	0.992823	0.0596155	1	1	0.99976	0.00315174	3	0	1	1.43541	0	0.1	0	Random Only
'FALDtm'	1	1	1	1	0.99976	0.00315174	0	0	1	0	0	0.1	0	Random Only
'FAOXC11'	1	1	1	1	0.99976	0.00315174	0	0	1	0	0	0.1	0	Random Only
'FAOXC140'	1	1	1	1	0.99976	0.00315174	0	0	1	0	0	0.1	0	Random Only
'FAOXC150m'	1	1	1	1	0.99976	0.00315174	0	0	1	0	0	0.1	0	Random Only
'FAOXC160'	0.991486	0.0599601	1	1	0.99976	0.00315174	3	0	1	1.43541	0	0.1	0	Random Only
'FAOXC16080m'	0.991486	0.0599601	1	1	0.99976	0.00315174	3	0	1	1.43541	0	0.1	0	Random Only
'FAOXC16080x'	1	1	1	1	0.99976	0.00315174	0	0	1	0	0	0.1	0	Random Only
'FAOXC161802m'	1	1	1	1	0.99976	0.00315174	0	0	1	0	0	0.1	0	Random Only
'FAOXC16180m'	1	1	1	1	0.99976	0.00315174	0	0	1	0	0	0.1	0	Random Only
'FAOXC170m'	1	1	1	1	0.99976	0.00315174	0	0	1	0	0	0.1	0	Random Only
'FAOXC180'	0.991486	0.0599601	1	1	0.99976	0.00315174	3	0	1	1.43541	0	0.1	0	Random Only
'FAOXC180x'	1	1	1	1	0.99976	0.00315174	0	0	1	0	0	0.1	0	Random Only
'FAOXC1811601m'	1	1	1	1	0.99976	0.00315174	0	0	1	0	0	0.1	0	Random Only
'FAOXC1811602m'	1	1	1	1	0.99976	0.00315174	0	0	1	0	0	0.1	0	Random Only
'FAOXC1811603m'	0.991541	0.0599452	1	1	0.99976	0.00315174	3	0	1	1.43541	0	0.1	0	Random Only
'FAOXC182806m'	1	1	1	1	0.99976	0.00315174	0	0	1	0	0	0.1	0	Random Only
'FAOXC18280m'	1	1	1	1	0.99976	0.00315174	0	0	1	0	0	0.1	0	Random Only
'FAOXC183803m'	1	1	1	1	0.99976	0.00315174	0	0	1	0	0	0.1	0	Random Only
'FAOXC183806m'	1	1	1	1	0.99976	0.00315174	0	0	1	0	0	0.1	0	Random Only
'FAOXC183806x'	1	1	1	1	0.99976	0.00315174	0	0	1	0	0	0.1	0	Random Only
'FAOXC18480m'	1	1	1	1	0.99976	0.00315174	0	0	1	0	0	0.1	0	Random Only
'FAOXC18480x'	1	1	1	1	0.99976	0.00315174	0	0	1	0	0	0.1	0	Random Only
'FAOXC200180m'	1	1	1	1	0.99976	0.00315174	0	0	1	0	0	0.1	0	Random Only
'FAOXC200180x'	1	1	1	1	0.99976	0.00315174	0	0	1	0	0	0.1	0	Random Only
'FAOXC2031836m'	1	1	1	1	0.99976	0.00315174	0	0	1	0	0	0.1	0	Random Only
'FAOXC204'	1	1	1	1	0.99976	0.00315174	0	0	1	0	0	0.1	0	Random Only
'FAOXC204184m'	1	1	1	1	0.99976	0.00315174	0	0	1	0	0	0.1	0	Random Only
'FAOXC2051843m'	1	1	1	1	0.99976	0.00315174	0	0	1	0	0	0.1	0	Random Only
'FAOXC2051843x'	1	1	1	1	0.99976	0.00315174	0	0	1	0	0	0.1	0	Random Only
'FAOXC2242046m'	1	1	1	1	0.99976	0.00315174	0	0	1	0	0	0.1	0	Random Only
'FAOXC2242046x'	1	1	1	1	0.99976	0.00315174	0	0	1	0	0	0.1	0	Random Only
'FAOXC2251836m'	1	1	1	1	0.99976	0.00315174	0	0	1	0	0	0.1	0	Random Only
'FAOXC2251836x'	1	1	1	1	0.99976	0.00315174	0	0	1	0	0	0.1	0	Random Only
'FAOXC2252053m'	1	1	1	1	0.99976	0.00315174	0	0	1	0	0	0.1	0	Random Only
'FAOXC2252053x'	1	1	1	1	0.99976	0.00315174	0	0	1	0	0	0.1	0	Random Only
'FAOXC226'	1	1	1	1	0.99976	0.00315174	0	0	1	0	0	0.1	0	Random Only
'FAOXC226205m'	1	1	1	1	0.99976	0.00315174	0	0	1	0	0	0.1	0	Random Only
'FAOXC226205x'	1	1	1	1	0.99976	0.00315174	0	0	1	0	0	0.1	0	Random Only
'FAOXC240200x'	1	1	1	1	0.99976	0.00315174	0	0	1	0	0	0.1	0	Random Only
'FAOXC241181x'	1	1	1	1	0.99976	0.00315174	0	0	1	0	0	0.1	0	Random Only
'FAOXC2442246x'	1	1	1	1	0.99976	0.00315174	0	0	1	0	0	0.1	0	Random Only
'FAOXC2452253x'	1	1	1	1	0.99976	0.00315174	0	0	1	0	0	0.1	0	Random Only
'FAOXC2452256x'	1	1	1	1	0.99976	0.00315174	0	0	1	0	0	0.1	0	Random Only
'FAOXC246226x'	1	1	1	1	0.99976	0.00315174	0	0	1	0	0	0.1	0	Random Only
'FAOXC260240x'	1	1	1	1	0.99976	0.00315174	0	0	1	0	0	0.1	0	Random Only
'FAOXC80'	0.99439	0.0466069	1	1	0.99976	0.00315174	3	0	1	1.43541	0	0.1	0	Random Only
'FAS100COA'	0.993237	0.056186	1	1	0.99976	0.00315174	3	0	1	1.43541	0	0.1	0	Random Only
'FAS120COA'	0.993237	0.056186	1	1	0.99976	0.00315174	3	0	1	1.43541	0	0.1	0	Random Only
'FAS140COA'	0.993237	0.056186	1	1	0.99976	0.00315174	3	0	1	1.43541	0	0.1	0	Random Only
'FAS160COA'	0.993338	0.0553403	1	1	0.99976	0.00315174	3	0	1	1.43541	0	0.1	0	Random Only
'FAS180COA'	0.993206	0.0564312	1	1	0.99976	0.00315174	3	0	1	1.43541	0	0.1	0	Random Only
'FAS80COA_L'	0.993141	0.0569762	1	1	0.99976	0.00315174	3	0	1	1.43541	0	0.1	0	Random Only
'FATP1t'	1	1	1	1	0.99976	0.00315174	0	0	1	0	0	0.1	0	Random Only
'FATP2t'	1	1	1	1	0.99976	0.00315174	0	0	1	0	0	0.1	0	Random Only
'FATP3t'	1	1	1	1	0.99976	0.00315174	0	0	1	0	0	0.1	0	Random Only
'FATP4t'	1	1	1	1	0.99976	0.00315174	0	0	1	0	0	0.1	0	Random Only
'FATP5t'	1	1	1	1	0.99976	0.00315174	0	0	1	0	0	0.1	0	Random Only
'FATP6t'	1	1	1	1	0.99976	0.00315174	0	0	1	0	0	0.1	0	Random Only
'FATP7t'	1	1	1	1	0.99976	0.00315174	0	0	1	0	0	0.1	0	Random Only
'FATP8t'	1	1	1	1	0.99976	0.00315174	0	0	1	0	0	0.1	0	Random Only
'FATP9t'	1	1	1	1	0.99976	0.00315174	0	0	1	0	0	0.1	0	Random Only
'FBA'	0.992823	0.0596155	1	1	0.99976	0.00315174	3	0	1	1.43541	0	0.1	0	Random Only
'FBA2'	0.992823	0.0596155	1	1	0.99976	0.00315174	3	0	1	1.43541	0	0.1	0	Random Only
'FBA4'	1	1	1	1	0.99976	0.00315174	0	0	1	0	0	0.1	0	Random Only
'FBP'	0.992823	0.0596155	1	1	0.99976	0.00315174	3	0	1	1.43541	0	0.1	0	Random Only
'FBP26'	0.992823	0.0596155	1	1	0.99976	0.00315174	3	0	1	1.43541	0	0.1	0	Random Only
'FCLTm'	1	1	1	1	0.99976	0.00315174	0	0	1	0	0	0.1	0	Random Only
'FE2t'	1	1	1	1	0.99976	0.00315174	0	0	1	0	0	0.1	0	Random Only
'FE2tm'	1	1	1	1	0.99976	0.00315174	0	0	1	0	0	0.1	0	Random Only
'FK'	1	1	1	1	0.99976	0.00315174	0	0	1	0	0	0.1	0	Random Only
'FMNAT'	1	1	1	1	0.99976	0.00315174	0	0	1	0	0	0.1	0	Random Only
'FOLR2'	1	1	1	1	0.99976	0.00315174	0	0	1	0	0	0.1	0	Random Only
'FOLt2'	1	1	1	1	0.99976	0.00315174	0	0	1	0	0	0.1	0	Random Only
'FORt2m'	0.993013	0.058036	1	1	0.99976	0.00315174	3	0	1	1.43541	0	0.1	0	Random Only
'FORtr'	0.99314	0.0569797	1	1	0.99976	0.00315174	3	0	1	1.43541	0	0.1	0	Random Only
'FORtrn'	1	1	1	1	0.99976	0.00315174	0	0	1	0	0	0.1	0	Random Only
'FPGS'	0.992823	0.0596155	1	1	0.99976	0.00315174	3	0	1	1.43541	0	0.1	0	Random Only
'FPGS2'	0.992823	0.0596155	1	1	0.99976	0.00315174	3	0	1	1.43541	0	0.1	0	Random Only
'FPGS2m'	0.992823	0.0596155	1	1	0.99976	0.00315174	3	0	1	1.43541	0	0.1	0	Random Only
'FPGS3'	0.992823	0.0596155	1	1	0.99976	0.00315174	3	0	1	1.43541	0	0.1	0	Random Only
'FPGS3m'	0.992823	0.0596155	1	1	0.99976	0.00315174	3	0	1	1.43541	0	0.1	0	Random Only
'FPGS4'	0.992823	0.0596155	1	1	0.99976	0.00315174	3	0	1	1.43541	0	0.1	0	Random Only
'FPGS4m'	0.992823	0.0596155	1	1	0.99976	0.00315174	3	0	1	1.43541	0	0.1	0	Random Only
'FPGS5'	0.992823	0.0596155	1	1	0.99976	0.00315174	3	0	1	1.43541	0	0.1	0	Random Only
'FPGS5m'	0.992823	0.0596155	1	1	0.99976	0.00315174	3	0	1	1.43541	0	0.1	0	Random Only
'FPGS6'	0.992823	0.0596155	1	1	0.99976	0.00315174	3	0	1	1.43541	0	0.1	0	Random Only
'FPGS6m'	0.992823	0.0596155	1	1	0.99976	0.00315174	3	0	1	1.43541	0	0.1	0	Random Only
'FPGS7'	0.992823	0.0596155	1	1	0.99976	0.00315174	3	0	1	1.43541	0	0.1	0	Random Only
'FPGS7m'	0.992823	0.0596155	1	1	0.99976	0.00315174	3	0	1	1.43541	0	0.1	0	Random Only
'FPGS8'	0.992823	0.0596155	1	1	0.99976	0.00315174	3	0	1	1.43541	0	0.1	0	Random Only
'FPGS8m'	0.992823	0.0596155	1	1	0.99976	0.00315174	3	0	1	1.43541	0	0.1	0	Random Only
'FPGS9'	0.992823	0.0596155	1	1	0.99976	0.00315174	3	0	1	1.43541	0	0.1	0	Random Only
'FPGS9m'	0.992823	0.0596155	1	1	0.99976	0.00315174	3	0	1	1.43541	0	0.1	0	Random Only
'FPGSm'	0.992823	0.0596155	1	1	0.99976	0.00315174	3	0	1	1.43541	0	0.1	0	Random Only
'FRDPtc'	1	1	1	1	0.99976	0.00315174	0	0	1	0	0	0.1	0	Random Only
'FRDPtr'	0.99314	0.0569797	1	1	0.99976	0.00315174	3	0	1	1.43541	0	0.1	0	Random Only
'FRTT'	1	1	1	1	0.99976	0.00315174	0	0	1	0	0	0.1	0	Random Only
'FRUt1r'	1	1	1	1	0.99976	0.00315174	0	0	1	0	0	0.1	0	Random Only
'FRUt4'	1	1	1	1	0.99976	0.00315174	0	0	1	0	0	0.1	0	Random Only
'FT'	1	1	1	1	0.99976	0.00315174	0	0	1	0	0	0.1	0	Random Only
'FTCD'	0.989427	0.061219	1	1	0.966282	0.0490263	11	0	281	5.26316	0	28.1	0	Random Only
'FTHFCL'	1	1	1	1	0.99976	0.00315174	0	0	1	0	0	0.1	0	Random Only
'FTHFDH'	0.993194	0.0565766	1	1	0.99976	0.00315174	3	0	1	1.43541	0	0.1	0	Random Only
'FTHFL'	0.992999	0.0581528	1	1	0.99976	0.00315174	3	0	1	1.43541	0	0.1	0	Random Only
'FTHFLm'	0.993013	0.058036	1	1	0.99976	0.00315174	3	0	1	1.43541	0	0.1	0	Random Only
'FUC13GALACGLCGAL14ACGLCGALGLUSIDEte'	1	1	1	1	0.99976	0.00315174	0	0	1	0	0	0.1	0	Random Only
'FUC13GALACGLCGAL14ACGLCGALGLUSIDEtg'	1	1	1	1	0.99976	0.00315174	0	0	1	0	0	0.1	0	Random Only
'FUC14GALACGLCGALGLUSIDEte'	1	1	1	1	0.99976	0.00315174	0	0	1	0	0	0.1	0	Random Only
'FUC14GALACGLCGALGLUSIDEtg'	1	1	1	1	0.99976	0.00315174	0	0	1	0	0	0.1	0	Random Only
'FUCACGALFUCGALACGLCGALGLUSIDEte'	1	1	1	1	0.99976	0.00315174	0	0	1	0	0	0.1	0	Random Only
'FUCACGALFUCGALACGLCGALGLUSIDEtg'	1	1	1	1	0.99976	0.00315174	0	0	1	0	0	0.1	0	Random Only
'FUCACNGAL14ACGLCGALGLUSIDEte'	1	1	1	1	0.99976	0.00315174	0	0	1	0	0	0.1	0	Random Only
'FUCACNGAL14ACGLCGALGLUSIDEtg'	1	1	1	1	0.99976	0.00315174	0	0	1	0	0	0.1	0	Random Only
'FUCACNGALACGLCGALGLUSIDEte'	1	1	1	1	0.99976	0.00315174	0	0	1	0	0	0.1	0	Random Only
'FUCACNGALACGLCGALGLUSIDEtg'	1	1	1	1	0.99976	0.00315174	0	0	1	0	0	0.1	0	Random Only
'FUCASE2e'	1	1	1	1	0.99976	0.00315174	0	0	1	0	0	0.1	0	Random Only
'FUCASE2ly'	1	1	1	1	0.99976	0.00315174	0	0	1	0	0	0.1	0	Random Only
'FUCASEe'	1	1	1	1	0.99976	0.00315174	0	0	1	0	0	0.1	0	Random Only
'FUCASEly'	1	1	1	1	0.99976	0.00315174	0	0	1	0	0	0.1	0	Random Only
'FUCFUC12GAL14ACGLCGALGLUSIDEte'	1	1	1	1	0.99976	0.00315174	0	0	1	0	0	0.1	0	Random Only
'FUCFUC12GAL14ACGLCGALGLUSIDEtg'	1	1	1	1	0.99976	0.00315174	0	0	1	0	0	0.1	0	Random Only
'FUCFUC132GALACGLCGAL14ACGLCGALGLUSIDEte'	1	1	1	1	0.99976	0.00315174	0	0	1	0	0	0.1	0	Random Only
'FUCFUC132GALACGLCGAL14ACGLCGALGLUSIDEtg'	1	1	1	1	0.99976	0.00315174	0	0	1	0	0	0.1	0	Random Only
'FUCFUCFUCGALACGLC13GALACGLCGAL14ACGLCGALGLUSIDEte'	1	1	1	1	0.99976	0.00315174	0	0	1	0	0	0.1	0	Random Only
'FUCFUCFUCGALACGLC13GALACGLCGAL14ACGLCGALGLUSIDEtg'	1	1	1	1	0.99976	0.00315174	0	0	1	0	0	0.1	0	Random Only
'FUCFUCFUCGALACGLCGAL14ACGLCGALGLUSIDEte'	1	1	1	1	0.99976	0.00315174	0	0	1	0	0	0.1	0	Random Only
'FUCFUCFUCGALACGLCGAL14ACGLCGALGLUSIDEtg'	1	1	1	1	0.99976	0.00315174	0	0	1	0	0	0.1	0	Random Only
'FUCFUCGALACGLCGALGLUSIDEte'	1	1	1	1	0.99976	0.00315174	0	0	1	0	0	0.1	0	Random Only
'FUCFUCGALACGLCGALGLUSIDEtg'	1	1	1	1	0.99976	0.00315174	0	0	1	0	0	0.1	0	Random Only
'FUCGAL14ACGLCGALGLUSIDEte'	1	1	1	1	0.99976	0.00315174	0	0	1	0	0	0.1	0	Random Only
'FUCGAL14ACGLCGALGLUSIDEtg'	1	1	1	1	0.99976	0.00315174	0	0	1	0	0	0.1	0	Random Only
'FUCGALFUCGALACGLCGALGLUSIDEte'	1	1	1	1	0.99976	0.00315174	0	0	1	0	0	0.1	0	Random Only
'FUCGALFUCGALACGLCGALGLUSIDEtg'	1	1	1	1	0.99976	0.00315174	0	0	1	0	0	0.1	0	Random Only
'FUCGALGBSIDEte'	1	1	1	1	0.99976	0.00315174	0	0	1	0	0	0.1	0	Random Only
'FUCGALGBSIDEtg'	1	1	1	1	0.99976	0.00315174	0	0	1	0	0	0.1	0	Random Only
'FUCtly'	1	1	1	1	0.99976	0.00315174	0	0	1	0	0	0.1	0	Random Only
'FUM'	1	1	1	1	0.99976	0.00315174	0	0	1	0	0	0.1	0	Random Only
'FUMAC'	1	1	1	1	0.99976	0.00315174	0	0	1	0	0	0.1	0	Random Only
'FUMSO3tm'	1	1	1	1	0.99976	0.00315174	0	0	1	0	0	0.1	0	Random Only
'FUMSO4tm'	1	1	1	1	0.99976	0.00315174	0	0	1	0	0	0.1	0	Random Only
'FUMTSULtm'	1	1	1	1	0.99976	0.00315174	0	0	1	0	0	0.1	0	Random Only
'FUMm'	1	1	1	1	0.99976	0.00315174	0	0	1	0	0	0.1	0	Random Only
'FUMtm'	1	1	1	1	0.99976	0.00315174	0	0	1	0	0	0.1	0	Random Only
'FUT11g'	1	1	1	1	0.99976	0.00315174	0	0	1	0	0	0.1	0	Random Only
'FUT12g'	1	1	1	1	0.99976	0.00315174	0	0	1	0	0	0.1	0	Random Only
'FUT14g'	1	1	1	1	0.99976	0.00315174	0	0	1	0	0	0.1	0	Random Only
'FUT15g'	1	1	1	1	0.99976	0.00315174	0	0	1	0	0	0.1	0	Random Only
'FUT16g'	1	1	1	1	0.99976	0.00315174	0	0	1	0	0	0.1	0	Random Only
'FUT17g'	1	1	1	1	0.99976	0.00315174	0	0	1	0	0	0.1	0	Random Only
'FUT18g'	1	1	1	1	0.99976	0.00315174	0	0	1	0	0	0.1	0	Random Only
'FUT31g'	1	1	1	1	0.99976	0.00315174	0	0	1	0	0	0.1	0	Random Only
'FUT32g'	1	1	1	1	0.99976	0.00315174	0	0	1	0	0	0.1	0	Random Only
'FUT33g'	1	1	1	1	0.99976	0.00315174	0	0	1	0	0	0.1	0	Random Only
'FUT34g'	1	1	1	1	0.99976	0.00315174	0	0	1	0	0	0.1	0	Random Only
'FUT35g'	1	1	1	1	0.99976	0.00315174	0	0	1	0	0	0.1	0	Random Only
'FUT910g'	1	1	1	1	0.99976	0.00315174	0	0	1	0	0	0.1	0	Random Only
'FUT911g'	1	1	1	1	0.99976	0.00315174	0	0	1	0	0	0.1	0	Random Only
'FUT91g'	1	1	1	1	0.99976	0.00315174	0	0	1	0	0	0.1	0	Random Only
'FUT92g'	1	1	1	1	0.99976	0.00315174	0	0	1	0	0	0.1	0	Random Only
'FUT93g'	1	1	1	1	0.99976	0.00315174	0	0	1	0	0	0.1	0	Random Only
'FUT94g'	1	1	1	1	0.99976	0.00315174	0	0	1	0	0	0.1	0	Random Only
'FUT95g'	1	1	1	1	0.99976	0.00315174	0	0	1	0	0	0.1	0	Random Only
'FUT96g'	1	1	1	1	0.99976	0.00315174	0	0	1	0	0	0.1	0	Random Only
'FUT97g'	1	1	1	1	0.99976	0.00315174	0	0	1	0	0	0.1	0	Random Only
'FUT98g'	1	1	1	1	0.99976	0.00315174	0	0	1	0	0	0.1	0	Random Only
'FUT99g'	1	1	1	1	0.99976	0.00315174	0	0	1	0	0	0.1	0	Random Only
'G12MT1_L'	0.992823	0.0596155	1	1	0.99976	0.00315174	3	0	1	1.43541	0	0.1	0	Random Only
'G12MT1_U'	0.992823	0.0596155	1	1	0.99976	0.00315174	3	0	1	1.43541	0	0.1	0	Random Only
'G12MT2_L'	0.992823	0.0596155	1	1	0.99976	0.00315174	3	0	1	1.43541	0	0.1	0	Random Only
'G12MT2_U'	0.992823	0.0596155	1	1	0.99976	0.00315174	3	0	1	1.43541	0	0.1	0	Random Only
'G13MT_L'	0.992823	0.0596155	1	1	0.99976	0.00315174	3	0	1	1.43541	0	0.1	0	Random Only
'G13MT_U'	0.992823	0.0596155	1	1	0.99976	0.00315174	3	0	1	1.43541	0	0.1	0	Random Only
'G14T10g'	1	1	1	1	0.99976	0.00315174	0	0	1	0	0	0.1	0	Random Only
'G14T11g'	1	1	1	1	0.99976	0.00315174	0	0	1	0	0	0.1	0	Random Only
'G14T12g'	1	1	1	1	0.99976	0.00315174	0	0	1	0	0	0.1	0	Random Only
'G14T13g'	1	1	1	1	0.99976	0.00315174	0	0	1	0	0	0.1	0	Random Only
'G14T14g'	1	1	1	1	0.99976	0.00315174	0	0	1	0	0	0.1	0	Random Only
'G14T15g'	1	1	1	1	0.99976	0.00315174	0	0	1	0	0	0.1	0	Random Only
'G14T16g'	1	1	1	1	0.99976	0.00315174	0	0	1	0	0	0.1	0	Random Only
'G14T17g'	1	1	1	1	0.99976	0.00315174	0	0	1	0	0	0.1	0	Random Only
'G14T18g'	1	1	1	1	0.99976	0.00315174	0	0	1	0	0	0.1	0	Random Only
'G14T19g'	1	1	1	1	0.99976	0.00315174	0	0	1	0	0	0.1	0	Random Only
'G14T20g'	1	1	1	1	0.99976	0.00315174	0	0	1	0	0	0.1	0	Random Only
'G14T21g'	1	1	1	1	0.99976	0.00315174	0	0	1	0	0	0.1	0	Random Only
'G14T2g'	0.992845	0.0594299	1	1	0.99976	0.00315174	3	0	1	1.43541	0	0.1	0	Random Only
'G14T3g'	0.992845	0.0594299	1	1	0.99976	0.00315174	3	0	1	1.43541	0	0.1	0	Random Only
'G14T4g'	0.992845	0.0594299	1	1	0.99976	0.00315174	3	0	1	1.43541	0	0.1	0	Random Only
'G14T5g'	0.992845	0.0594299	1	1	0.99976	0.00315174	3	0	1	1.43541	0	0.1	0	Random Only
'G14T6g'	1	1	1	1	0.99976	0.00315174	0	0	1	0	0	0.1	0	Random Only
'G14T7g'	1	1	1	1	0.99976	0.00315174	0	0	1	0	0	0.1	0	Random Only
'G14T8g'	1	1	1	1	0.99976	0.00315174	0	0	1	0	0	0.1	0	Random Only
'G14T9g'	1	1	1	1	0.99976	0.00315174	0	0	1	0	0	0.1	0	Random Only
'G14Tg'	1	1	1	1	0.99976	0.00315174	0	0	1	0	0	0.1	0	Random Only
'G16MT_L'	0.992823	0.0596155	1	1	0.99976	0.00315174	3	0	1	1.43541	0	0.1	0	Random Only
'G16MT_U'	0.992823	0.0596155	1	1	0.99976	0.00315174	3	0	1	1.43541	0	0.1	0	Random Only
'G1M6MASNB1terg'	1	1	1	1	0.99976	0.00315174	0	0	1	0	0	0.1	0	Random Only
'G1M7MASNBterg'	1	1	1	1	0.99976	0.00315174	0	0	1	0	0	0.1	0	Random Only
'G1M7MASNCterg'	1	1	1	1	0.99976	0.00315174	0	0	1	0	0	0.1	0	Random Only
'G1M8MASNterg'	1	1	1	1	0.99976	0.00315174	0	0	1	0	0	0.1	0	Random Only
'G2M8MASNterg'	1	1	1	1	0.99976	0.00315174	0	0	1	0	0	0.1	0	Random Only
'G3M8MASNterg'	1	1	1	1	0.99976	0.00315174	0	0	1	0	0	0.1	0	Random Only
'G3PD1'	0.992991	0.0582555	1	1	0.99976	0.00315174	3	0	1	1.43541	0	0.1	0	Random Only
'G3PD2m'	0.991593	0.0599554	1	1	0.99976	0.00315174	3	0	1	1.43541	0	0.1	0	Random Only
'G5SADrm'	0.992823	0.0596155	1	1	0.99976	0.00315174	3	0	1	1.43541	0	0.1	0	Random Only
'G5SADs'	1	1	1	1	0.99976	0.00315174	0	0	1	0	0	0.1	0	Random Only
'G5SDym'	0.992823	0.0596155	1	1	0.99976	0.00315174	3	0	1	1.43541	0	0.1	0	Random Only
'G6PDA'	0.992823	0.0596155	1	1	0.99976	0.00315174	3	0	1	1.43541	0	0.1	0	Random Only
'G6PDH1er'	1	1	1	1	0.99976	0.00315174	0	0	1	0	0	0.1	0	Random Only
'G6PDH1rer'	1	1	1	1	0.99976	0.00315174	0	0	1	0	0	0.1	0	Random Only
'G6PDH2r'	0.993349	0.0552604	1	1	0.99976	0.00315174	3	0	1	1.43541	0	0.1	0	Random Only
'G6PDH2rer'	1	1	1	1	0.99976	0.00315174	0	0	1	0	0	0.1	0	Random Only
'G6PPer'	0.992823	0.0596155	1	1	0.99976	0.00315174	3	0	1	1.43541	0	0.1	0	Random Only
'G6Pter'	0.992823	0.0596155	1	1	0.99976	0.00315174	3	0	1	1.43541	0	0.1	0	Random Only
'GABAVESSEC'	0.992823	0.0596155	1	1	0.99976	0.00315174	3	0	1	1.43541	0	0.1	0	Random Only
'GACMTRc'	0.980379	0.0684882	1	1	0.99592	0.0160454	30	0	25	14.3541	0	2.5	0	Random Only
'GACPAILter'	1	1	1	1	0.99976	0.00315174	0	0	1	0	0	0.1	0	Random Only
'GALACGLCGALGBSIDEte'	1	1	1	1	0.99976	0.00315174	0	0	1	0	0	0.1	0	Random Only
'GALASE10ly'	1	1	1	1	0.99976	0.00315174	0	0	1	0	0	0.1	0	Random Only
'GALASE11ly'	1	1	1	1	0.99976	0.00315174	0	0	1	0	0	0.1	0	Random Only
'GALASE12ly'	1	1	1	1	0.99976	0.00315174	0	0	1	0	0	0.1	0	Random Only
'GALASE13ly'	1	1	1	1	0.99976	0.00315174	0	0	1	0	0	0.1	0	Random Only
'GALASE14ly'	1	1	1	1	0.99976	0.00315174	0	0	1	0	0	0.1	0	Random Only
'GALASE15ly'	1	1	1	1	0.99976	0.00315174	0	0	1	0	0	0.1	0	Random Only
'GALASE16ly'	0.992845	0.0594299	1	1	0.99976	0.00315174	3	0	1	1.43541	0	0.1	0	Random Only
'GALASE17ly'	0.992845	0.0594299	1	1	0.99976	0.00315174	3	0	1	1.43541	0	0.1	0	Random Only
'GALASE18ly'	0.992845	0.0594299	1	1	0.99976	0.00315174	3	0	1	1.43541	0	0.1	0	Random Only
'GALASE19ly'	0.992845	0.0594299	1	1	0.99976	0.00315174	3	0	1	1.43541	0	0.1	0	Random Only
'GALASE1ly'	1	1	1	1	0.99976	0.00315174	0	0	1	0	0	0.1	0	Random Only
'GALASE20ly'	1	1	1	1	0.99976	0.00315174	0	0	1	0	0	0.1	0	Random Only
'GALASE3ly'	1	1	1	1	0.99976	0.00315174	0	0	1	0	0	0.1	0	Random Only
'GALASE4ly'	1	1	1	1	0.99976	0.00315174	0	0	1	0	0	0.1	0	Random Only
'GALASE5ly'	1	1	1	1	0.99976	0.00315174	0	0	1	0	0	0.1	0	Random Only
'GALASE6ly'	1	1	1	1	0.99976	0.00315174	0	0	1	0	0	0.1	0	Random Only
'GALASE7ly'	1	1	1	1	0.99976	0.00315174	0	0	1	0	0	0.1	0	Random Only
'GALASE8ly'	1	1	1	1	0.99976	0.00315174	0	0	1	0	0	0.1	0	Random Only
'GALASE9ly'	1	1	1	1	0.99976	0.00315174	0	0	1	0	0	0.1	0	Random Only
'GALC'	1	1	1	1	0.99976	0.00315174	0	0	1	0	0	0.1	0	Random Only
'GALFUC12GAL14ACGLCGALGLUSIDEte'	1	1	1	1	0.99976	0.00315174	0	0	1	0	0	0.1	0	Random Only
'GALFUC12GAL14ACGLCGALGLUSIDEtg'	1	1	1	1	0.99976	0.00315174	0	0	1	0	0	0.1	0	Random Only
'GALFUCGALACGLCGAL14ACGLCGALGLUSIDEte'	1	1	1	1	0.99976	0.00315174	0	0	1	0	0	0.1	0	Random Only
'GALFUCGALACGLCGAL14ACGLCGALGLUSIDEtg'	1	1	1	1	0.99976	0.00315174	0	0	1	0	0	0.1	0	Random Only
'GALGALFUCFUCGALACGLCGALACGLCGAL14ACGLCGALGLUSIDEte'	1	1	1	1	0.99976	0.00315174	0	0	1	0	0	0.1	0	Random Only
'GALGALFUCFUCGALACGLCGALACGLCGAL14ACGLCGALGLUSIDEtg'	1	1	1	1	0.99976	0.00315174	0	0	1	0	0	0.1	0	Random Only
'GALGALGALTHCRMte'	1	1	1	1	0.99976	0.00315174	0	0	1	0	0	0.1	0	Random Only
'GALGLUSIDEtg'	1	1	1	1	0.99976	0.00315174	0	0	1	0	0	0.1	0	Random Only
'GALGLUSIDEtl'	1	1	1	1	0.99976	0.00315174	0	0	1	0	0	0.1	0	Random Only
'GALK'	0.992823	0.0596155	1	1	0.99976	0.00315174	3	0	1	1.43541	0	0.1	0	Random Only
'GALNACT1g'	1	1	1	1	0.99976	0.00315174	0	0	1	0	0	0.1	0	Random Only
'GALNACT2g'	1	1	1	1	0.99976	0.00315174	0	0	1	0	0	0.1	0	Random Only
'GALNACT3g'	1	1	1	1	0.99976	0.00315174	0	0	1	0	0	0.1	0	Random Only
'GALNACT4g'	1	1	1	1	0.99976	0.00315174	0	0	1	0	0	0.1	0	Random Only
'GALNACT5g'	1	1	1	1	0.99976	0.00315174	0	0	1	0	0	0.1	0	Random Only
'GALNTg'	0.992845	0.0594299	1	1	0.99976	0.00315174	3	0	1	1.43541	0	0.1	0	Random Only
'GALOR'	1	1	1	1	0.99976	0.00315174	0	0	1	0	0	0.1	0	Random Only
'GALSIDEtl'	1	1	1	1	0.99976	0.00315174	0	0	1	0	0	0.1	0	Random Only
'GALT'	1	1	1	1	0.99976	0.00315174	0	0	1	0	0	0.1	0	Random Only
'GALT2g'	1	1	1	1	0.99976	0.00315174	0	0	1	0	0	0.1	0	Random Only
'GALTg'	1	1	1	1	0.99976	0.00315174	0	0	1	0	0	0.1	0	Random Only
'GALU'	1	1	1	1	0.99976	0.00315174	0	0	1	0	0	0.1	0	Random Only
'GALt1r'	1	1	1	1	0.99976	0.00315174	0	0	1	0	0	0.1	0	Random Only
'GALt2_2'	1	1	1	1	0.99976	0.00315174	0	0	1	0	0	0.1	0	Random Only
'GALt4'	1	1	1	1	0.99976	0.00315174	0	0	1	0	0	0.1	0	Random Only
'GALt4_2'	1	1	1	1	0.99976	0.00315174	0	0	1	0	0	0.1	0	Random Only
'GALtly'	0.992845	0.0594299	1	1	0.99976	0.00315174	3	0	1	1.43541	0	0.1	0	Random Only
'GAMYe'	1	1	1	1	0.99976	0.00315174	0	0	1	0	0	0.1	0	Random Only
'GAMt1r'	1	1	1	1	0.99976	0.00315174	0	0	1	0	0	0.1	0	Random Only
'GAO1'	1	1	1	1	0.99976	0.00315174	0	0	1	0	0	0.1	0	Random Only
'GAO1g'	1	1	1	1	0.99976	0.00315174	0	0	1	0	0	0.1	0	Random Only
'GAO2'	1	1	1	1	0.99976	0.00315174	0	0	1	0	0	0.1	0	Random Only
'GAO2g'	1	1	1	1	0.99976	0.00315174	0	0	1	0	0	0.1	0	Random Only
'GAPD'	0.990111	0.0614777	1	1	0.99976	0.00315174	8	0	1	3.82775	0	0.1	0	Random Only
'GARFT'	0.698098	0.0385676	0.710222	0.000930407	0.754012	0.0714812	209	6000	992	100	100	99.2	1	Both
'GASNASE2ly'	0.992823	0.0596155	1	1	0.99976	0.00315174	3	0	1	1.43541	0	0.1	0	Random Only
'GASNASE3ly'	1	1	1	1	0.99976	0.00315174	0	0	1	0	0	0.1	0	Random Only
'GASNASEly'	1	1	1	1	0.99976	0.00315174	0	0	1	0	0	0.1	0	Random Only
'GBA'	0.992823	0.0596155	1	1	0.99976	0.00315174	3	0	1	1.43541	0	0.1	0	Random Only
'GBAl'	1	1	1	1	0.99976	0.00315174	0	0	1	0	0	0.1	0	Random Only
'GBGT1'	1	1	1	1	0.99976	0.00315174	0	0	1	0	0	0.1	0	Random Only
'GBSIDEte'	1	1	1	1	0.99976	0.00315174	0	0	1	0	0	0.1	0	Random Only
'GBSIDEtl'	1	1	1	1	0.99976	0.00315174	0	0	1	0	0	0.1	0	Random Only
'GCALDD'	1	1	1	1	0.99976	0.00315174	0	0	1	0	0	0.1	0	Random Only
'GCALDDm'	1	1	1	1	0.99976	0.00315174	0	0	1	0	0	0.1	0	Random Only
'GCC2am'	0.992829	0.0595687	1	1	0.99976	0.00315174	3	0	1	1.43541	0	0.1	0	Random Only
'GCC2bim'	0.992829	0.0595687	1	1	0.99976	0.00315174	3	0	1	1.43541	0	0.1	0	Random Only
'GCC2cm'	0.992829	0.0595687	1	1	0.99976	0.00315174	3	0	1	1.43541	0	0.1	0	Random Only
'GCCam'	0.992829	0.0595687	1	1	0.99976	0.00315174	3	0	1	1.43541	0	0.1	0	Random Only
'GCCbim'	0.992829	0.0595687	1	1	0.99976	0.00315174	3	0	1	1.43541	0	0.1	0	Random Only
'GCCcm'	0.992829	0.0595687	1	1	0.99976	0.00315174	3	0	1	1.43541	0	0.1	0	Random Only
'GCHOLAt'	1	1	1	1	0.99976	0.00315174	0	0	1	0	0	0.1	0	Random Only
'GCHOLAt2'	1	1	1	1	0.99976	0.00315174	0	0	1	0	0	0.1	0	Random Only
'GCHOLAt3'	0.992823	0.0596155	1	1	0.99976	0.00315174	3	0	1	1.43541	0	0.1	0	Random Only
'GCHOLAte'	1	1	1	1	0.99976	0.00315174	0	0	1	0	0	0.1	0	Random Only
'GCHOLAtx'	1	1	1	1	0.99976	0.00315174	0	0	1	0	0	0.1	0	Random Only
'GCNTg'	1	1	1	1	0.99976	0.00315174	0	0	1	0	0	0.1	0	Random Only
'GD1B2te'	1	1	1	1	0.99976	0.00315174	0	0	1	0	0	0.1	0	Random Only
'GD1B2tg'	1	1	1	1	0.99976	0.00315174	0	0	1	0	0	0.1	0	Random Only
'GD1Cte'	1	1	1	1	0.99976	0.00315174	0	0	1	0	0	0.1	0	Random Only
'GD1Ctg'	1	1	1	1	0.99976	0.00315174	0	0	1	0	0	0.1	0	Random Only
'GDCHOLAte'	1	1	1	1	0.99976	0.00315174	0	0	1	0	0	0.1	0	Random Only
'GDPFUCtg'	1	1	1	1	0.99976	0.00315174	0	0	1	0	0	0.1	0	Random Only
'GDPtg'	1	1	1	1	0.99976	0.00315174	0	0	1	0	0	0.1	0	Random Only
'GF6PTA'	0.992823	0.0596155	1	1	0.99976	0.00315174	3	0	1	1.43541	0	0.1	0	Random Only
'GFUCS'	1	1	1	1	0.99976	0.00315174	0	0	1	0	0	0.1	0	Random Only
'GGH-10FTHF5GLUe'	1	1	1	1	0.99976	0.00315174	0	0	1	0	0	0.1	0	Random Only
'GGH-10FTHF5GLUl'	0.992823	0.0596155	1	1	0.99976	0.00315174	3	0	1	1.43541	0	0.1	0	Random Only
'GGH-10FTHF6GLUe'	1	1	1	1	0.99976	0.00315174	0	0	1	0	0	0.1	0	Random Only
'GGH-10FTHF6GLUl'	0.992823	0.0596155	1	1	0.99976	0.00315174	3	0	1	1.43541	0	0.1	0	Random Only
'GGH-10FTHF7GLUe'	1	1	1	1	0.99976	0.00315174	0	0	1	0	0	0.1	0	Random Only
'GGH-10FTHF7GLUl'	0.992823	0.0596155	1	1	0.99976	0.00315174	3	0	1	1.43541	0	0.1	0	Random Only
'GGH-5DHFe'	1	1	1	1	0.99976	0.00315174	0	0	1	0	0	0.1	0	Random Only
'GGH-5DHFl'	0.992823	0.0596155	1	1	0.99976	0.00315174	3	0	1	1.43541	0	0.1	0	Random Only
'GGH-5THFe'	1	1	1	1	0.99976	0.00315174	0	0	1	0	0	0.1	0	Random Only
'GGH-5THFl'	0.992823	0.0596155	1	1	0.99976	0.00315174	3	0	1	1.43541	0	0.1	0	Random Only
'GGH-6DHFe'	1	1	1	1	0.99976	0.00315174	0	0	1	0	0	0.1	0	Random Only
'GGH-6DHFl'	0.992823	0.0596155	1	1	0.99976	0.00315174	3	0	1	1.43541	0	0.1	0	Random Only
'GGH-6THFe'	1	1	1	1	0.99976	0.00315174	0	0	1	0	0	0.1	0	Random Only
'GGH-6THFl'	0.992823	0.0596155	1	1	0.99976	0.00315174	3	0	1	1.43541	0	0.1	0	Random Only
'GGH-7DHFe'	1	1	1	1	0.99976	0.00315174	0	0	1	0	0	0.1	0	Random Only
'GGH-7DHFl'	0.992823	0.0596155	1	1	0.99976	0.00315174	3	0	1	1.43541	0	0.1	0	Random Only
'GGH-7THFe'	1	1	1	1	0.99976	0.00315174	0	0	1	0	0	0.1	0	Random Only
'GGH-7THFl'	0.992823	0.0596155	1	1	0.99976	0.00315174	3	0	1	1.43541	0	0.1	0	Random Only
'GGLUCT'	0.992823	0.0596155	1	1	0.99976	0.00315174	3	0	1	1.43541	0	0.1	0	Random Only
'GGNG'	0.992476	0.0597839	1	1	0.99976	0.00315174	4	0	1	1.91388	0	0.1	0	Random Only
'GGT5r'	1	1	1	1	0.99976	0.00315174	0	0	1	0	0	0.1	0	Random Only
'GGT6'	1	1	1	1	0.99976	0.00315174	0	0	1	0	0	0.1	0	Random Only
'GGT_L'	1	1	1	1	0.99976	0.00315174	0	0	1	0	0	0.1	0	Random Only
'GGT_U'	1	1	1	1	0.99976	0.00315174	0	0	1	0	0	0.1	0	Random Only
'GHMT2r'	0.844876	0.0671439	0.866042	0.00182	0.933695	0.0655666	209	6000	515	100	100	51.5	1	Both
'GHMT2rm'	1	1	1	1	0.99976	0.00315174	0	0	1	0	0	0.1	0	Random Only
'GHMT3'	1	1	1	1	0.99976	0.00315174	0	0	1	0	0	0.1	0	Random Only
'GHMT3m'	1	1	1	1	0.99976	0.00315174	0	0	1	0	0	0.1	0	Random Only
'GK1'	0.503196	0.0111338	0.5	1.46858e-15	0.49988	0.00157587	209	6000	1000	100	100	100	1	Both
'GK1m'	1	1	1	1	0.99976	0.00315174	0	0	1	0	0	0.1	0	Random Only
'GLACO'	1	1	1	1	0.99976	0.00315174	0	0	1	0	0	0.1	0	Random Only
'GLACOm'	1	1	1	1	0.99976	0.00315174	0	0	1	0	0	0.1	0	Random Only
'GLACter'	1	1	1	1	0.99976	0.00315174	0	0	1	0	0	0.1	0	Random Only
'GLAl'	1	1	1	1	0.99976	0.00315174	0	0	1	0	0	0.1	0	Random Only
'GLB1'	1	1	1	1	0.99976	0.00315174	0	0	1	0	0	0.1	0	Random Only
'GLBRAN'	0.992476	0.0597839	1	1	0.99976	0.00315174	4	0	1	1.91388	0	0.1	0	Random Only
'GLCAASE1ly'	1	1	1	1	0.99976	0.00315174	0	0	1	0	0	0.1	0	Random Only
'GLCAASE4ly'	1	1	1	1	0.99976	0.00315174	0	0	1	0	0	0.1	0	Random Only
'GLCAASE5ly'	1	1	1	1	0.99976	0.00315174	0	0	1	0	0	0.1	0	Random Only
'GLCAASE6ly'	1	1	1	1	0.99976	0.00315174	0	0	1	0	0	0.1	0	Random Only
'GLCAASE7ly'	1	1	1	1	0.99976	0.00315174	0	0	1	0	0	0.1	0	Random Only
'GLCAASE8ly'	0.992823	0.0596155	1	1	0.99976	0.00315174	3	0	1	1.43541	0	0.1	0	Random Only
'GLCAASE9ly'	0.992823	0.0596155	1	1	0.99976	0.00315174	3	0	1	1.43541	0	0.1	0	Random Only
'GLCAE2g'	1	1	1	1	0.99976	0.00315174	0	0	1	0	0	0.1	0	Random Only
'GLCAT2g'	1	1	1	1	0.99976	0.00315174	0	0	1	0	0	0.1	0	Random Only
'GLCAT3g'	1	1	1	1	0.99976	0.00315174	0	0	1	0	0	0.1	0	Random Only
'GLCAT4g'	1	1	1	1	0.99976	0.00315174	0	0	1	0	0	0.1	0	Random Only
'GLCAT5g'	1	1	1	1	0.99976	0.00315174	0	0	1	0	0	0.1	0	Random Only
'GLCAT6g'	1	1	1	1	0.99976	0.00315174	0	0	1	0	0	0.1	0	Random Only
'GLCAT7g'	1	1	1	1	0.99976	0.00315174	0	0	1	0	0	0.1	0	Random Only
'GLCAT8g'	1	1	1	1	0.99976	0.00315174	0	0	1	0	0	0.1	0	Random Only
'GLCAT9g'	1	1	1	1	0.99976	0.00315174	0	0	1	0	0	0.1	0	Random Only
'GLCATg'	1	1	1	1	0.99976	0.00315174	0	0	1	0	0	0.1	0	Random Only
'GLCMter'	1	1	1	1	0.99976	0.00315174	0	0	1	0	0	0.1	0	Random Only
'GLCNACASE1ly'	1	1	1	1	0.99976	0.00315174	0	0	1	0	0	0.1	0	Random Only
'GLCNACASE2ly'	1	1	1	1	0.99976	0.00315174	0	0	1	0	0	0.1	0	Random Only
'GLCNACASE3ly'	1	1	1	1	0.99976	0.00315174	0	0	1	0	0	0.1	0	Random Only
'GLCNACASE4ly'	1	1	1	1	0.99976	0.00315174	0	0	1	0	0	0.1	0	Random Only
'GLCNACASE5ly'	1	1	1	1	0.99976	0.00315174	0	0	1	0	0	0.1	0	Random Only
'GLCNACDASg'	1	1	1	1	0.99976	0.00315174	0	0	1	0	0	0.1	0	Random Only
'GLCNACPT_L'	0.992823	0.0596155	1	1	0.99976	0.00315174	3	0	1	1.43541	0	0.1	0	Random Only
'GLCNACPT_U'	0.992823	0.0596155	1	1	0.99976	0.00315174	3	0	1	1.43541	0	0.1	0	Random Only
'GLCNACT1g'	1	1	1	1	0.99976	0.00315174	0	0	1	0	0	0.1	0	Random Only
'GLCNACT2g'	1	1	1	1	0.99976	0.00315174	0	0	1	0	0	0.1	0	Random Only
'GLCNACT3g'	1	1	1	1	0.99976	0.00315174	0	0	1	0	0	0.1	0	Random Only
'GLCNACT4g'	1	1	1	1	0.99976	0.00315174	0	0	1	0	0	0.1	0	Random Only
'GLCNACT5g'	1	1	1	1	0.99976	0.00315174	0	0	1	0	0	0.1	0	Random Only
'GLCNACT_L'	0.992823	0.0596155	1	1	0.99976	0.00315174	3	0	1	1.43541	0	0.1	0	Random Only
'GLCNACT_U'	0.992823	0.0596155	1	1	0.99976	0.00315174	3	0	1	1.43541	0	0.1	0	Random Only
'GLCURter'	0.992823	0.0596155	1	1	0.99976	0.00315174	3	0	1	1.43541	0	0.1	0	Random Only
'GLCURtly'	0.992823	0.0596155	1	1	0.99976	0.00315174	3	0	1	1.43541	0	0.1	0	Random Only
'GLCt1r'	1	1	1	1	0.99976	0.00315174	0	0	1	0	0	0.1	0	Random Only
'GLCt2_2'	1	1	1	1	0.99976	0.00315174	0	0	1	0	0	0.1	0	Random Only
'GLCt2r'	1	1	1	1	0.99976	0.00315174	0	0	1	0	0	0.1	0	Random Only
'GLCt4'	1	1	1	1	0.99976	0.00315174	0	0	1	0	0	0.1	0	Random Only
'GLCt4_2'	1	1	1	1	0.99976	0.00315174	0	0	1	0	0	0.1	0	Random Only
'GLCter'	0.992823	0.0596155	1	1	0.99976	0.00315174	3	0	1	1.43541	0	0.1	0	Random Only
'GLCtg'	0.992823	0.0596155	1	1	0.99976	0.00315174	3	0	1	1.43541	0	0.1	0	Random Only
'GLCtly'	1	1	1	1	0.99976	0.00315174	0	0	1	0	0	0.1	0	Random Only
'GLDBRAN'	0.992823	0.0596155	1	1	0.99976	0.00315174	3	0	1	1.43541	0	0.1	0	Random Only
'GLGNS1'	0.992476	0.0597839	1	1	0.99976	0.00315174	4	0	1	1.91388	0	0.1	0	Random Only
'GLNALANaEx'	1	1	1	1	0.99976	0.00315174	0	0	1	0	0	0.1	0	Random Only
'GLNASNNaEx'	1	1	1	1	0.99976	0.00315174	0	0	1	0	0	0.1	0	Random Only
'GLNCYSNaEx'	1	1	1	1	0.99976	0.00315174	0	0	1	0	0	0.1	0	Random Only
'GLNLASEer'	1	1	1	1	0.99976	0.00315174	0	0	1	0	0	0.1	0	Random Only
'GLNS'	0.991734	0.0601731	1	1	0.999006	0.00935661	6	0	8	2.87081	0	0.8	0	Random Only
'GLNSERNaEx'	1	1	1	1	0.99976	0.00315174	0	0	1	0	0	0.1	0	Random Only
'GLNTHRNaEx'	1	1	1	1	0.99976	0.00315174	0	0	1	0	0	0.1	0	Random Only
'GLNt4'	1	1	1	1	0.99976	0.00315174	0	0	1	0	0	0.1	0	Random Only
'GLNtN1'	1	1	1	1	0.99976	0.00315174	0	0	1	0	0	0.1	0	Random Only
'GLNtm'	0.992986	0.0582577	1	1	0.99976	0.00315174	3	0	1	1.43541	0	0.1	0	Random Only
'GLPASE1'	0.992823	0.0596155	1	1	0.99976	0.00315174	3	0	1	1.43541	0	0.1	0	Random Only
'GLPASE2'	0.992823	0.0596155	1	1	0.99976	0.00315174	3	0	1	1.43541	0	0.1	0	Random Only
'GLRASE'	1	1	1	1	0.99976	0.00315174	0	0	1	0	0	0.1	0	Random Only
'GLU5Km'	0.992823	0.0596155	1	1	0.99976	0.00315174	3	0	1	1.43541	0	0.1	0	Random Only
'GLUCYS'	0.992823	0.0596155	1	1	0.99976	0.00315174	3	0	1	1.43541	0	0.1	0	Random Only
'GLUDxm'	0.99286	0.0593057	1	1	0.99976	0.00315174	3	0	1	1.43541	0	0.1	0	Random Only
'GLUDym'	0.99286	0.0593057	1	1	0.99976	0.00315174	3	0	1	1.43541	0	0.1	0	Random Only
'GLUNm'	0.992986	0.0582577	1	1	0.99976	0.00315174	3	0	1	1.43541	0	0.1	0	Random Only
'GLUPRT'	0.698098	0.0385676	0.710222	0.000930407	0.754012	0.0714812	209	6000	992	100	100	99.2	1	Both
'GLUTCOADHm'	1	1	1	1	0.99976	0.00315174	0	0	1	0	0	0.1	0	Random Only
'GLUVESSEC'	0.992823	0.0596155	1	1	0.99976	0.00315174	3	0	1	1.43541	0	0.1	0	Random Only
'GLUt2m'	0.993359	0.0551603	1	1	0.99976	0.00315174	3	0	1	1.43541	0	0.1	0	Random Only
'GLUt6'	0.992823	0.0596155	1	1	0.99976	0.00315174	3	0	1	1.43541	0	0.1	0	Random Only
'GLUt7l'	0.992823	0.0596155	1	1	0.99976	0.00315174	3	0	1	1.43541	0	0.1	0	Random Only
'GLUtr'	1	1	1	1	0.99976	0.00315174	0	0	1	0	0	0.1	0	Random Only
'GLXO1'	1	1	1	1	0.99976	0.00315174	0	0	1	0	0	0.1	0	Random Only
'GLXtm'	1	1	1	1	0.99976	0.00315174	0	0	1	0	0	0.1	0	Random Only
'GLXtp'	1	1	1	1	0.99976	0.00315174	0	0	1	0	0	0.1	0	Random Only
'GLYAMDTRc'	0.980379	0.0684882	1	1	0.99592	0.0160454	30	0	25	14.3541	0	2.5	0	Random Only
'GLYATm'	1	1	1	1	0.99976	0.00315174	0	0	1	0	0	0.1	0	Random Only
'GLYBt4(2)r'	0.992837	0.0594966	1	1	0.999507	0.0043532	3	0	1	1.43541	0	0.1	0	Random Only
'GLYBtm'	0.992837	0.0594966	1	1	0.999507	0.0043532	3	0	1	1.43541	0	0.1	0	Random Only
'GLYC-St'	1	1	1	1	0.99976	0.00315174	0	0	1	0	0	0.1	0	Random Only
'GLYC3Ptm'	1	1	1	1	0.99976	0.00315174	0	0	1	0	0	0.1	0	Random Only
'GLYCK2'	1	1	1	1	0.99976	0.00315174	0	0	1	0	0	0.1	0	Random Only
'GLYCLTDy'	1	1	1	1	0.99976	0.00315174	0	0	1	0	0	0.1	0	Random Only
'GLYCLTtp'	1	1	1	1	0.99976	0.00315174	0	0	1	0	0	0.1	0	Random Only
'GLYCt'	0.99475	0.0436076	1	1	0.99976	0.00315174	3	0	1	1.43541	0	0.1	0	Random Only
'GLYCtm'	1	1	1	1	0.99976	0.00315174	0	0	1	0	0	0.1	0	Random Only
'GLYK'	1	1	1	1	0.99976	0.00315174	0	0	1	0	0	0.1	0	Random Only
'GLYKm'	1	1	1	1	0.99976	0.00315174	0	0	1	0	0	0.1	0	Random Only
'GLYOX'	0.993115	0.0571889	1	1	0.99976	0.00315174	3	0	1	1.43541	0	0.1	0	Random Only
'GLYOXm'	1	1	1	1	0.99976	0.00315174	0	0	1	0	0	0.1	0	Random Only
'GLYVESSEC'	0.992823	0.0596155	1	1	0.99976	0.00315174	3	0	1	1.43541	0	0.1	0	Random Only
'GLYt2r'	1	1	1	1	0.99976	0.00315174	0	0	1	0	0	0.1	0	Random Only
'GLYt2rL'	1	1	1	1	0.99976	0.00315174	0	0	1	0	0	0.1	0	Random Only
'GLYt4'	1	1	1	1	0.99976	0.00315174	0	0	1	0	0	0.1	0	Random Only
'GLYt7(211)r'	1	1	1	1	0.99976	0.00315174	0	0	1	0	0	0.1	0	Random Only
'GLYt7(311)r'	1	1	1	1	0.99976	0.00315174	0	0	1	0	0	0.1	0	Random Only
'GLYtm'	0.992829	0.0595687	1	1	0.999754	0.00315366	3	0	1	1.43541	0	0.1	0	Random Only
'GLYtp'	1	1	1	1	0.99976	0.00315174	0	0	1	0	0	0.1	0	Random Only
'GMAND'	1	1	1	1	0.99976	0.00315174	0	0	1	0	0	0.1	0	Random Only
'GMPR'	0.992823	0.0596155	1	1	0.99976	0.00315174	3	0	1	1.43541	0	0.1	0	Random Only
'GMPS2'	0.696862	0.0383271	0.708901	0.000925235	0.717157	0.0579375	209	6000	1000	100	100	100	1	Both
'GMPtg'	1	1	1	1	0.99976	0.00315174	0	0	1	0	0	0.1	0	Random Only
'GMPtn'	0.992823	0.0596155	1	1	0.99976	0.00315174	3	0	1	1.43541	0	0.1	0	Random Only
'GND'	0.993349	0.0552604	1	1	0.99976	0.00315174	3	0	1	1.43541	0	0.1	0	Random Only
'GNDer'	1	1	1	1	0.99976	0.00315174	0	0	1	0	0	0.1	0	Random Only
'GNMT'	1	1	1	1	0.99976	0.00315174	0	0	1	0	0	0.1	0	Random Only
'GP1CALPHAte'	1	1	1	1	0.99976	0.00315174	0	0	1	0	0	0.1	0	Random Only
'GP1CALPHAtg'	1	1	1	1	0.99976	0.00315174	0	0	1	0	0	0.1	0	Random Only
'GP1Cte'	1	1	1	1	0.99976	0.00315174	0	0	1	0	0	0.1	0	Random Only
'GP1Ctg'	1	1	1	1	0.99976	0.00315174	0	0	1	0	0	0.1	0	Random Only
'GPAM_hs'	1	1	1	1	0.99976	0.00315174	0	0	1	0	0	0.1	0	Random Only
'GPAMm_hs'	1	1	1	1	0.99976	0.00315174	0	0	1	0	0	0.1	0	Random Only
'GPDDA1'	0.992823	0.0596155	1	1	0.99976	0.00315174	3	0	1	1.43541	0	0.1	0	Random Only
'GPIAT'	1	1	1	1	0.99976	0.00315174	0	0	1	0	0	0.1	0	Random Only
'GPIMTer_L'	1	1	1	1	0.99976	0.00315174	0	0	1	0	0	0.1	0	Random Only
'GPIMTer_U'	1	1	1	1	0.99976	0.00315174	0	0	1	0	0	0.1	0	Random Only
'GQ1BALPHAte'	1	1	1	1	0.99976	0.00315174	0	0	1	0	0	0.1	0	Random Only
'GQ1BALPHAtg'	1	1	1	1	0.99976	0.00315174	0	0	1	0	0	0.1	0	Random Only
'GQ1Bte'	1	1	1	1	0.99976	0.00315174	0	0	1	0	0	0.1	0	Random Only
'GQ1Btg'	1	1	1	1	0.99976	0.00315174	0	0	1	0	0	0.1	0	Random Only
'GRTT'	1	1	1	1	0.99976	0.00315174	0	0	1	0	0	0.1	0	Random Only
'GRTTx'	0.99314	0.0569797	1	1	0.99976	0.00315174	3	0	1	1.43541	0	0.1	0	Random Only
'GSNKm'	1	1	1	1	0.99976	0.00315174	0	0	1	0	0	0.1	0	Random Only
'GSNt'	1	1	1	1	0.99976	0.00315174	0	0	1	0	0	0.1	0	Random Only
'GSNt4'	1	1	1	1	0.99976	0.00315174	0	0	1	0	0	0.1	0	Random Only
'GSNt5'	1	1	1	1	0.99976	0.00315174	0	0	1	0	0	0.1	0	Random Only
'GSNtl'	1	1	1	1	0.99976	0.00315174	0	0	1	0	0	0.1	0	Random Only
'GSNtm'	1	1	1	1	0.99976	0.00315174	0	0	1	0	0	0.1	0	Random Only
'GT1Ate'	1	1	1	1	0.99976	0.00315174	0	0	1	0	0	0.1	0	Random Only
'GT1Atg'	1	1	1	1	0.99976	0.00315174	0	0	1	0	0	0.1	0	Random Only
'GTHDH'	0.992823	0.0596155	1	1	0.99976	0.00315174	3	0	1	1.43541	0	0.1	0	Random Only
'GTHO'	0.992823	0.0596155	1	1	0.99976	0.00315174	3	0	1	1.43541	0	0.1	0	Random Only
'GTHOm'	0.992823	0.0596155	1	1	0.99976	0.00315174	3	0	1	1.43541	0	0.1	0	Random Only
'GTHP'	0.992823	0.0596155	1	1	0.99976	0.00315174	3	0	1	1.43541	0	0.1	0	Random Only
'GTHPe'	1	1	1	1	0.99976	0.00315174	0	0	1	0	0	0.1	0	Random Only
'GTHPm'	0.992823	0.0596155	1	1	0.99976	0.00315174	3	0	1	1.43541	0	0.1	0	Random Only
'GTHRDt'	1	1	1	1	0.99976	0.00315174	0	0	1	0	0	0.1	0	Random Only
'GTHRDtr'	1	1	1	1	0.99976	0.00315174	0	0	1	0	0	0.1	0	Random Only
'GTHS'	0.992823	0.0596155	1	1	0.99976	0.00315174	3	0	1	1.43541	0	0.1	0	Random Only
'GTMLTe'	0.992823	0.0596155	1	1	0.99976	0.00315174	3	0	1	1.43541	0	0.1	0	Random Only
'GTPCI'	1	1	1	1	0.99976	0.00315174	0	0	1	0	0	0.1	0	Random Only
'GTPCIn'	1	1	1	1	0.99976	0.00315174	0	0	1	0	0	0.1	0	Random Only
'GTPtn'	1	1	1	1	0.99976	0.00315174	0	0	1	0	0	0.1	0	Random Only
'GUACYC'	0.992823	0.0596155	1	1	0.99976	0.00315174	3	0	1	1.43541	0	0.1	0	Random Only
'GUAD'	1	1	1	1	0.99976	0.00315174	0	0	1	0	0	0.1	0	Random Only
'GUAPRT'	0.992823	0.0596155	1	1	0.99976	0.00315174	3	0	1	1.43541	0	0.1	0	Random Only
'GUAt'	0.979208	0.069581	1	1	0.99386	0.0218779	30	0	41	14.3541	0	4.1	0	Random Only
'GULLACter'	1	1	1	1	0.99976	0.00315174	0	0	1	0	0	0.1	0	Random Only
'GULN3D'	0.992823	0.0596155	1	1	0.99976	0.00315174	3	0	1	1.43541	0	0.1	0	Random Only
'GULNDer'	0.992823	0.0596155	1	1	0.99976	0.00315174	3	0	1	1.43541	0	0.1	0	Random Only
'GULNter'	0.992823	0.0596155	1	1	0.99976	0.00315174	3	0	1	1.43541	0	0.1	0	Random Only
'GUR1PP'	0.993125	0.0571085	1	1	0.99976	0.00315174	3	0	1	1.43541	0	0.1	0	Random Only
'GluForTx'	0.989427	0.061219	1	1	0.966282	0.0490263	11	0	281	5.26316	0	28.1	0	Random Only
'H2CO3D'	0.692692	0.0376555	0.703731	0.00090168	0.746236	0.0695082	209	6000	993	100	100	99.3	1	Both
'H2CO3D2'	0.692692	0.0376555	0.703731	0.00090168	0.746236	0.0695082	209	6000	993	100	100	99.3	1	Both
'H2CO3D2m'	1	1	1	1	0.99976	0.00315174	0	0	1	0	0	0.1	0	Random Only
'H2ETer'	1	1	1	1	0.99976	0.00315174	0	0	1	0	0	0.1	0	Random Only
'H2MTer_L'	1	1	1	1	0.99976	0.00315174	0	0	1	0	0	0.1	0	Random Only
'H2MTer_U'	1	1	1	1	0.99976	0.00315174	0	0	1	0	0	0.1	0	Random Only
'H2O2t'	0.992823	0.0596155	1	1	0.99976	0.00315174	3	0	1	1.43541	0	0.1	0	Random Only
'H2O2tly'	0.992823	0.0596155	1	1	0.99976	0.00315174	3	0	1	1.43541	0	0.1	0	Random Only
'H2O2tm'	0.992823	0.0596155	1	1	0.99976	0.00315174	3	0	1	1.43541	0	0.1	0	Random Only
'H2O2tn'	0.994453	0.0460722	1	1	0.99976	0.00315174	3	0	1	1.43541	0	0.1	0	Random Only
'H2O2tp'	0.992823	0.0596155	1	1	0.99976	0.00315174	3	0	1	1.43541	0	0.1	0	Random Only
'H2Ot'	1	1	1	1	0.99976	0.00315174	0	0	1	0	0	0.1	0	Random Only
'H2Oter'	0.989068	0.0619638	1	1	0.99976	0.00315174	12	0	1	5.74163	0	0.1	0	Random Only
'H2Otg'	0.992823	0.0596155	1	1	0.99976	0.00315174	3	0	1	1.43541	0	0.1	0	Random Only
'H2Otly'	0.992823	0.0596155	1	1	0.99976	0.00315174	3	0	1	1.43541	0	0.1	0	Random Only
'H2Otm'	1	1	1	1	0.99976	0.00315174	0	0	1	0	0	0.1	0	Random Only
'H2Otn'	0.992823	0.0596155	1	1	0.99976	0.00315174	3	0	1	1.43541	0	0.1	0	Random Only
'H2Otp'	0.992823	0.0596155	1	1	0.99976	0.00315174	3	0	1	1.43541	0	0.1	0	Random Only
'H3ETer'	1	1	1	1	0.99976	0.00315174	0	0	1	0	0	0.1	0	Random Only
'H3MTer_L'	1	1	1	1	0.99976	0.00315174	0	0	1	0	0	0.1	0	Random Only
'H3MTer_U'	1	1	1	1	0.99976	0.00315174	0	0	1	0	0	0.1	0	Random Only
'H4ETer'	1	1	1	1	0.99976	0.00315174	0	0	1	0	0	0.1	0	Random Only
'H5MTer_L'	1	1	1	1	0.99976	0.00315174	0	0	1	0	0	0.1	0	Random Only
'H5MTer_U'	1	1	1	1	0.99976	0.00315174	0	0	1	0	0	0.1	0	Random Only
'H6''ET2er'	1	1	1	1	0.99976	0.00315174	0	0	1	0	0	0.1	0	Random Only
'H6''ETer'	1	1	1	1	0.99976	0.00315174	0	0	1	0	0	0.1	0	Random Only
'H6MTer_L'	1	1	1	1	0.99976	0.00315174	0	0	1	0	0	0.1	0	Random Only
'H6MTer_U'	1	1	1	1	0.99976	0.00315174	0	0	1	0	0	0.1	0	Random Only
'H7''ETer'	1	1	1	1	0.99976	0.00315174	0	0	1	0	0	0.1	0	Random Only
'H7''TAer'	1	1	1	1	0.99976	0.00315174	0	0	1	0	0	0.1	0	Random Only
'H7ET2er'	1	1	1	1	0.99976	0.00315174	0	0	1	0	0	0.1	0	Random Only
'H7MTer_L'	1	1	1	1	0.99976	0.00315174	0	0	1	0	0	0.1	0	Random Only
[truncated: 1,395 more rows]

## Sheet: ZIKV
Model Reaction ID	Average Media Analysis Normalised Virus Optima	S.D. Media Analysis Normalised Virus Optima	Average Point Mutation Analysis Normalised Virus Optima	S.D. Point Mutation Analysis Normalised Virus Optima	Average Random Mutation Analysis Normalised Virus Optima	S.D. Random Mutation Analysis Normalised Virus Optima	Reaction Frequency Media Analysis	Reaction Frequency Point Mutation Analysis	Reaction Frequency Random Mutation Analysis	Reaction Frequency Media Analysis (% Total Cases)	Reaction Frequency Point Mutation Analysis (% Total Cases)	Reaction Frequency Random Mutation Analysis (% Total Cases)	Identified by Unaltered Host-Derived Enforcement Analysis	Mutation Conditions Present In
'10FTHF5GLUtl'	0.992823	0.0596155	1	1	0.99971	0.00467856	3	0	2	1.43541	0	0.2	0	Random Only
'10FTHF5GLUtm'	0.992823	0.0596155	1	1	0.99971	0.00467856	3	0	2	1.43541	0	0.2	0	Random Only
'10FTHF6GLUtl'	0.992823	0.0596155	1	1	0.99971	0.00467856	3	0	2	1.43541	0	0.2	0	Random Only
'10FTHF6GLUtm'	0.992823	0.0596155	1	1	0.99971	0.00467856	3	0	2	1.43541	0	0.2	0	Random Only
'10FTHF7GLUtl'	0.992823	0.0596155	1	1	0.99971	0.00467856	3	0	2	1.43541	0	0.2	0	Random Only
'10FTHF7GLUtm'	0.992823	0.0596155	1	1	0.99971	0.00467856	3	0	2	1.43541	0	0.2	0	Random Only
'10FTHFtl'	0.992823	0.0596155	1	1	0.99971	0.00467856	3	0	2	1.43541	0	0.2	0	Random Only
'10FTHFtm'	0.992823	0.0596155	1	1	0.99971	0.00467856	3	0	2	1.43541	0	0.2	0	Random Only
'13DAMPPOX'	1	1	1	1	0.99971	0.00467856	0	0	2	0	0	0.2	0	Random Only
'1MNCAMti'	1	1	1	1	0.99971	0.00467856	0	0	2	0	0	0.2	0	Random Only
'1a,24,25VITD2Hm'	1	1	1	1	0.99971	0.00467856	0	0	2	0	0	0.2	0	Random Only
'1a,24,25VITD3Hm'	1	1	1	1	0.99971	0.00467856	0	0	2	0	0	0.2	0	Random Only
'1a,25VITD2Hm'	1	1	1	1	0.99971	0.00467856	0	0	2	0	0	0.2	0	Random Only
'1a,25VITD3Hm'	1	1	1	1	0.99971	0.00467856	0	0	2	0	0	0.2	0	Random Only
'24,25DHVITD2t'	1	1	1	1	0.99971	0.00467856	0	0	2	0	0	0.2	0	Random Only
'24,25DHVITD2tm'	1	1	1	1	0.99971	0.00467856	0	0	2	0	0	0.2	0	Random Only
'24,25DHVITD3t'	0.993103	0.0572918	1	1	0.99971	0.00467856	3	0	2	1.43541	0	0.2	0	Random Only
'24,25DHVITD3tm'	0.993103	0.0572918	1	1	0.99971	0.00467856	3	0	2	1.43541	0	0.2	0	Random Only
'24,25VITD2Hm'	1	1	1	1	0.99971	0.00467856	0	0	2	0	0	0.2	0	Random Only
'24,25VITD3Hm'	0.993103	0.0572918	1	1	0.99971	0.00467856	3	0	2	1.43541	0	0.2	0	Random Only
'24NPHte'	1	1	1	1	0.99971	0.00467856	0	0	2	0	0	0.2	0	Random Only
'25HVITD2t'	1	1	1	1	0.99971	0.00467856	0	0	2	0	0	0.2	0	Random Only
'25HVITD2tin'	1	1	1	1	0.99971	0.00467856	0	0	2	0	0	0.2	0	Random Only
'25HVITD2tin-m'	1	1	1	1	0.99971	0.00467856	0	0	2	0	0	0.2	0	Random Only
'25HVITD2tm'	1	1	1	1	0.99971	0.00467856	0	0	2	0	0	0.2	0	Random Only
'25HVITD3t'	1	1	1	1	0.99971	0.00467856	0	0	2	0	0	0.2	0	Random Only
'25HVITD3tin'	1	1	1	1	0.99971	0.00467856	0	0	2	0	0	0.2	0	Random Only
'25HVITD3tin-m'	1	1	1	1	0.99971	0.00467856	0	0	2	0	0	0.2	0	Random Only
'25HVITD3tm'	1	1	1	1	0.99971	0.00467856	0	0	2	0	0	0.2	0	Random Only
'25VITD2Hm'	1	1	1	1	0.99971	0.00467856	0	0	2	0	0	0.2	0	Random Only
'25VITD3Hm'	1	1	1	1	0.99971	0.00467856	0	0	2	0	0	0.2	0	Random Only
'2DR1PP'	0.993066	0.0575955	1	1	0.99971	0.00467856	3	0	2	1.43541	0	0.2	0	Random Only
'2HBO'	0.890038	0.061132	0.889099	0.0013058	0.950887	0.0486579	183	6000	450	87.5598	100	45	1	Both
'2HBt2'	0.890038	0.061132	0.889099	0.0013058	0.950887	0.0486579	183	6000	450	87.5598	100	45	1	Both
'2HCO3_NAt'	1	1	1	1	0.99971	0.00467856	0	0	2	0	0	0.2	0	Random Only
'2MCITt'	0.89234	0.0641805	0.889099	0.0013058	0.950887	0.0486579	179	6000	450	85.6459	100	45	1	Both
'2OXOADOXm'	1	1	1	1	0.99971	0.00467856	0	0	2	0	0	0.2	0	Random Only
'2OXOADPTm'	1	1	1	1	0.99971	0.00467856	0	0	2	0	0	0.2	0	Random Only
'34DHPHAMT'	1	1	1	1	0.99971	0.00467856	0	0	2	0	0	0.2	0	Random Only
'34DHPLACOX'	1	1	1	1	0.99971	0.00467856	0	0	2	0	0	0.2	0	Random Only
'34DHPLACOX(NADP)'	1	1	1	1	0.99971	0.00467856	0	0	2	0	0	0.2	0	Random Only
'34HPLFM'	1	1	1	1	0.99971	0.00467856	0	0	2	0	0	0.2	0	Random Only
'35CGMPtn'	0.992823	0.0596155	1	1	0.99971	0.00467856	3	0	2	1.43541	0	0.2	0	Random Only
'3AIBTm'	0.965178	0.0641282	1	1	0.994375	0.0117004	28	0	2	13.3971	0	0.2	0	Random Only
'3AIBt'	0.965178	0.0641282	1	1	0.994375	0.0117004	28	0	2	13.3971	0	0.2	0	Random Only
'3AIBtm'	0.965178	0.0641282	1	1	0.994375	0.0117004	28	0	2	13.3971	0	0.2	0	Random Only
'3DPHBH1'	1	1	1	1	0.99971	0.00467856	0	0	2	0	0	0.2	0	Random Only
'3DPHBH2'	1	1	1	1	0.99971	0.00467856	0	0	2	0	0	0.2	0	Random Only
'3DSPHR'	0.977087	0.0677948	1	1	0.996017	0.0147169	27	0	24	12.9187	0	2.4	0	Random Only
'3HAO'	1	1	1	1	0.99971	0.00467856	0	0	2	0	0	0.2	0	Random Only
'3HBCDm'	1	1	1	1	0.99971	0.00467856	0	0	2	0	0	0.2	0	Random Only
'3HBCOAHLm'	0.960644	0.0677343	1	1	0.99437	0.0116995	34	0	2	16.2679	0	0.2	0	Random Only
'3HCO3_NAt'	1	1	1	1	0.99971	0.00467856	0	0	2	0	0	0.2	0	Random Only
'3HLYTCL'	1	1	1	1	0.99971	0.00467856	0	0	2	0	0	0.2	0	Random Only
'3HPCOAHYD'	1	1	1	1	0.99971	0.00467856	0	0	2	0	0	0.2	0	Random Only
'3HXKYNDCL'	1	1	1	1	0.99971	0.00467856	0	0	2	0	0	0.2	0	Random Only
'3HXKYNOXDA'	1	1	1	1	0.99971	0.00467856	0	0	2	0	0	0.2	0	Random Only
'3M4HDXPAC'	1	1	1	1	0.99971	0.00467856	0	0	2	0	0	0.2	0	Random Only
'3MLDAt'	0.986945	0.0624583	1	1	0.945456	0.0535439	14	0	462	6.69856	0	46.2	0	Random Only
'3MOBt2im'	1	1	1	1	0.99971	0.00467856	0	0	2	0	0	0.2	0	Random Only
'3MOPt2im'	1	1	1	1	0.99971	0.00467856	0	0	2	0	0	0.2	0	Random Only
'3MOX4HOXPGALDOX'	1	1	1	1	0.99971	0.00467856	0	0	2	0	0	0.2	0	Random Only
'3MOX4HOXPGALDOX(NADP)'	1	1	1	1	0.99971	0.00467856	0	0	2	0	0	0.2	0	Random Only
'3MOXTYROX'	1	1	1	1	0.99971	0.00467856	0	0	2	0	0	0.2	0	Random Only
'3NTD7l'	1	1	1	1	0.99971	0.00467856	0	0	2	0	0	0.2	0	Random Only
'3SALAASPm'	1	1	1	1	0.99971	0.00467856	0	0	2	0	0	0.2	0	Random Only
'3SALATAi'	1	1	1	1	0.99971	0.00467856	0	0	2	0	0	0.2	0	Random Only
'3SALATAim'	1	1	1	1	0.99971	0.00467856	0	0	2	0	0	0.2	0	Random Only
'41R1H2MAE12BOOX'	1	1	1	1	0.99971	0.00467856	0	0	2	0	0	0.2	0	Random Only
'41R2A1H12BOOX'	1	1	1	1	0.99971	0.00467856	0	0	2	0	0	0.2	0	Random Only
'42A12BOOX'	1	1	1	1	0.99971	0.00467856	0	0	2	0	0	0.2	0	Random Only
'4ABUTtm'	0.99394	0.0503354	1	1	0.99971	0.00467856	3	0	2	1.43541	0	0.2	0	Random Only
'4HBZCOAFm'	1	1	1	1	0.99971	0.00467856	0	0	2	0	0	0.2	0	Random Only
'4HBZFm'	1	1	1	1	0.99971	0.00467856	0	0	2	0	0	0.2	0	Random Only
'4HDEBRISOQUINEte'	1	1	1	1	0.99971	0.00467856	0	0	2	0	0	0.2	0	Random Only
'4HGLSDm'	1	1	1	1	0.99971	0.00467856	0	0	2	0	0	0.2	0	Random Only
'4HOXPACDOX(NADP)'	0.992631	0.0596051	1	1	0.999706	0.00468018	3	0	2	1.43541	0	0.2	0	Random Only
'4MOPt2im'	1	1	1	1	0.99971	0.00467856	0	0	2	0	0	0.2	0	Random Only
'4MPTNLte'	1	1	1	1	0.99971	0.00467856	0	0	2	0	0	0.2	0	Random Only
'4MPTNLtm'	1	1	1	1	0.99971	0.00467856	0	0	2	0	0	0.2	0	Random Only
'4MPTNLtr'	1	1	1	1	0.99971	0.00467856	0	0	2	0	0	0.2	0	Random Only
'4NPHSFte'	1	1	1	1	0.99971	0.00467856	0	0	2	0	0	0.2	0	Random Only
'4NPHSULT'	1	1	1	1	0.99971	0.00467856	0	0	2	0	0	0.2	0	Random Only
'4NPHte'	1	1	1	1	0.99971	0.00467856	0	0	2	0	0	0.2	0	Random Only
'4PYRDX'	1	1	1	1	0.99971	0.00467856	0	0	2	0	0	0.2	0	Random Only
'5ADTSTSTERONEGLCte'	1	1	1	1	0.99971	0.00467856	0	0	2	0	0	0.2	0	Random Only
'5ADTSTSTERONEGLCtr'	1	1	1	1	0.99971	0.00467856	0	0	2	0	0	0.2	0	Random Only
'5ADTSTSTERONEte'	1	1	1	1	0.99971	0.00467856	0	0	2	0	0	0.2	0	Random Only
'5ADTSTSTERONEtr'	1	1	1	1	0.99971	0.00467856	0	0	2	0	0	0.2	0	Random Only
'5DHFtl'	0.992823	0.0596155	1	1	0.99971	0.00467856	3	0	2	1.43541	0	0.2	0	Random Only
'5FTHFt2'	1	1	1	1	0.99971	0.00467856	0	0	2	0	0	0.2	0	Random Only
'5HLTDL'	0.850911	0.0653764	0.843563	0.00377889	0.736031	0.0498875	193	6000	1000	92.3445	100	100	1	Both
'5HOXINDACTO2OX'	1	1	1	1	0.99971	0.00467856	0	0	2	0	0	0.2	0	Random Only
'5HOXINDACTOX'	1	1	1	1	0.99971	0.00467856	0	0	2	0	0	0.2	0	Random Only
'5HOXINDACTOXm'	1	1	1	1	0.99971	0.00467856	0	0	2	0	0	0.2	0	Random Only
'5HOXINOXDA'	1	1	1	1	0.99971	0.00467856	0	0	2	0	0	0.2	0	Random Only
'5HTRPDOX'	1	1	1	1	0.99971	0.00467856	0	0	2	0	0	0.2	0	Random Only
'5HTRPVESSEC'	0.851054	0.06567	0.843563	0.00377889	0.736031	0.0498875	193	6000	1000	92.3445	100	100	1	Both
'5HXKYNDCL'	1	1	1	1	0.99971	0.00467856	0	0	2	0	0	0.2	0	Random Only
'5HXKYNOXDA'	1	1	1	1	0.99971	0.00467856	0	0	2	0	0	0.2	0	Random Only
'5MTHFt'	1	1	1	1	0.99971	0.00467856	0	0	2	0	0	0.2	0	Random Only
'5MTHFt2'	1	1	1	1	0.99971	0.00467856	0	0	2	0	0	0.2	0	Random Only
'5THFtl'	0.992823	0.0596155	1	1	0.99971	0.00467856	3	0	2	1.43541	0	0.2	0	Random Only
'5THFtm'	0.992823	0.0596155	1	1	0.99971	0.00467856	3	0	2	1.43541	0	0.2	0	Random Only
'6DHFtl'	0.992823	0.0596155	1	1	0.99971	0.00467856	3	0	2	1.43541	0	0.2	0	Random Only
'6DHFtm'	0.992823	0.0596155	1	1	0.99971	0.00467856	3	0	2	1.43541	0	0.2	0	Random Only
'6HTSTSTERONEte'	1	1	1	1	0.99971	0.00467856	0	0	2	0	0	0.2	0	Random Only
'6THFtl'	0.992823	0.0596155	1	1	0.99971	0.00467856	3	0	2	1.43541	0	0.2	0	Random Only
'6THFtm'	0.992823	0.0596155	1	1	0.99971	0.00467856	3	0	2	1.43541	0	0.2	0	Random Only
'7DHCHSTEROLtr'	0.993081	0.0574697	1	1	0.99971	0.00467856	3	0	2	1.43541	0	0.2	0	Random Only
'7DHFtl'	0.992823	0.0596155	1	1	0.99971	0.00467856	3	0	2	1.43541	0	0.2	0	Random Only
'7DHFtm'	0.992823	0.0596155	1	1	0.99971	0.00467856	3	0	2	1.43541	0	0.2	0	Random Only
'7THFtl'	0.992823	0.0596155	1	1	0.99971	0.00467856	3	0	2	1.43541	0	0.2	0	Random Only
'7THFtm'	0.992823	0.0596155	1	1	0.99971	0.00467856	3	0	2	1.43541	0	0.2	0	Random Only
'A4GALTc'	1	1	1	1	0.99971	0.00467856	0	0	2	0	0	0.2	0	Random Only
'A4GALTg'	1	1	1	1	0.99971	0.00467856	0	0	2	0	0	0.2	0	Random Only
'AACOAT'	0.992822	0.0596155	1	1	0.99971	0.00467856	3	0	2	1.43541	0	0.2	0	Random Only
'ABO1g'	1	1	1	1	0.99971	0.00467856	0	0	2	0	0	0.2	0	Random Only
'ABO2g'	1	1	1	1	0.99971	0.00467856	0	0	2	0	0	0.2	0	Random Only
'ABO3g'	1	1	1	1	0.99971	0.00467856	0	0	2	0	0	0.2	0	Random Only
'ABO4g'	1	1	1	1	0.99971	0.00467856	0	0	2	0	0	0.2	0	Random Only
'ABO5g'	1	1	1	1	0.99971	0.00467856	0	0	2	0	0	0.2	0	Random Only
'ABO6g'	1	1	1	1	0.99971	0.00467856	0	0	2	0	0	0.2	0	Random Only
'ABO7g'	1	1	1	1	0.99971	0.00467856	0	0	2	0	0	0.2	0	Random Only
'ABO8g'	1	1	1	1	0.99971	0.00467856	0	0	2	0	0	0.2	0	Random Only
'ABO9g'	1	1	1	1	0.99971	0.00467856	0	0	2	0	0	0.2	0	Random Only
'ABTArm'	0.99394	0.0503354	1	1	0.99971	0.00467856	3	0	2	1.43541	0	0.2	0	Random Only
'ABTD'	0.993851	0.0510733	1	1	0.99971	0.00467856	3	0	2	1.43541	0	0.2	0	Random Only
'ABTti'	0.993851	0.0510733	1	1	0.99971	0.00467856	3	0	2	1.43541	0	0.2	0	Random Only
'ABUTD'	0.993135	0.0570229	1	1	0.99971	0.00467856	3	0	2	1.43541	0	0.2	0	Random Only
'ABUTt2r'	1	1	1	1	0.99971	0.00467856	0	0	2	0	0	0.2	0	Random Only
'ABUTt2rL'	1	1	1	1	0.99971	0.00467856	0	0	2	0	0	0.2	0	Random Only
'ABUTt4(2)r'	1	1	1	1	0.99971	0.00467856	0	0	2	0	0	0.2	0	Random Only
'ACACT1'	1	1	1	1	0.99971	0.00467856	0	0	2	0	0	0.2	0	Random Only
'ACACT10m'	1	1	1	1	0.99971	0.00467856	0	0	2	0	0	0.2	0	Random Only
'ACACT1r'	0.992822	0.0596155	1	1	0.99971	0.00467856	3	0	2	1.43541	0	0.2	0	Random Only
'ACACT1rm'	0.992806	0.0596137	1	1	0.99971	0.00467856	3	0	2	1.43541	0	0.2	0	Random Only
'ACACT1x'	1	1	1	1	0.99971	0.00467856	0	0	2	0	0	0.2	0	Random Only
'ACACT4p'	1	1	1	1	0.99971	0.00467856	0	0	2	0	0	0.2	0	Random Only
'ACACT5p'	1	1	1	1	0.99971	0.00467856	0	0	2	0	0	0.2	0	Random Only
'ACACT6p'	1	1	1	1	0.99971	0.00467856	0	0	2	0	0	0.2	0	Random Only
'ACACT7p'	1	1	1	1	0.99971	0.00467856	0	0	2	0	0	0.2	0	Random Only
'ACACT8p'	1	1	1	1	0.99971	0.00467856	0	0	2	0	0	0.2	0	Random Only
'ACACT9p'	1	1	1	1	0.99971	0.00467856	0	0	2	0	0	0.2	0	Random Only
'ACACt2'	0.992825	0.0595976	1	1	0.99971	0.00467856	3	0	2	1.43541	0	0.2	0	Random Only
'ACACt2m'	0.992822	0.0596155	1	1	0.99971	0.00467856	3	0	2	1.43541	0	0.2	0	Random Only
'ACACtx'	0.993461	0.0543163	1	1	0.99971	0.00467856	3	0	2	1.43541	0	0.2	0	Random Only
'ACALDt'	1	1	1	1	0.99971	0.00467856	0	0	2	0	0	0.2	0	Random Only
'ACALDtm'	1	1	1	1	0.99971	0.00467856	0	0	2	0	0	0.2	0	Random Only
'ACALDtr'	1	1	1	1	0.99971	0.00467856	0	0	2	0	0	0.2	0	Random Only
'ACALDtx'	1	1	1	1	0.99971	0.00467856	0	0	2	0	0	0.2	0	Random Only
'ACCOAC'	0.992823	0.0596155	1	1	0.99971	0.00467856	3	0	2	1.43541	0	0.2	0	Random Only
'ACCOACm'	0.992823	0.0596155	1	1	0.99971	0.00467856	3	0	2	1.43541	0	0.2	0	Random Only
'ACCOAL'	1	1	1	1	0.99971	0.00467856	0	0	2	0	0	0.2	0	Random Only
'ACCOALm'	1	1	1	1	0.99971	0.00467856	0	0	2	0	0	0.2	0	Random Only
'ACCOAgt'	1	1	1	1	0.99971	0.00467856	0	0	2	0	0	0.2	0	Random Only
'ACCOAtn'	1	1	1	1	0.99971	0.00467856	0	0	2	0	0	0.2	0	Random Only
'ACCOAtr'	1	1	1	1	0.99971	0.00467856	0	0	2	0	0	0.2	0	Random Only
'ACETONEt2'	0.992807	0.0595957	1	1	0.99971	0.00467856	3	0	2	1.43541	0	0.2	0	Random Only
'ACETONEt2m'	0.992807	0.0595957	1	1	0.99971	0.00467856	3	0	2	1.43541	0	0.2	0	Random Only
'ACGAGBSIDEtg'	1	1	1	1	0.99971	0.00467856	0	0	2	0	0	0.2	0	Random Only
'ACGAGBSIDEtl'	1	1	1	1	0.99971	0.00467856	0	0	2	0	0	0.2	0	Random Only
'ACGALFUCGALACGALFUC12GAL14ACGLCGALGLUSIDEte'	1	1	1	1	0.99971	0.00467856	0	0	2	0	0	0.2	0	Random Only
'ACGALFUCGALACGALFUC12GAL14ACGLCGALGLUSIDEtg'	1	1	1	1	0.99971	0.00467856	0	0	2	0	0	0.2	0	Random Only
'ACGALFUCGALACGALFUCGALACGLCGAL14ACGLCGALGLUSIDEte'	1	1	1	1	0.99971	0.00467856	0	0	2	0	0	0.2	0	Random Only
'ACGALFUCGALACGALFUCGALACGLCGAL14ACGLCGALGLUSIDEtg'	1	1	1	1	0.99971	0.00467856	0	0	2	0	0	0.2	0	Random Only
'ACGALtly'	1	1	1	1	0.99971	0.00467856	0	0	2	0	0	0.2	0	Random Only
'ACGAM2E'	1	1	1	1	0.99971	0.00467856	0	0	2	0	0	0.2	0	Random Only
'ACGAM6PSi'	0.993644	0.0500363	1	1	0.999607	0.00505578	3	0	3	1.43541	0	0.3	0	Random Only
'ACGAMK'	0.992829	0.0595664	1	1	0.99971	0.00467856	3	0	2	1.43541	0	0.2	0	Random Only
'ACGAMPM'	0.992829	0.0595664	1	1	0.99971	0.00467856	3	0	2	1.43541	0	0.2	0	Random Only
'ACGAMtly'	0.992829	0.0595664	1	1	0.99971	0.00467856	3	0	2	1.43541	0	0.2	0	Random Only
'ACGPID'	1	1	1	1	0.99971	0.00467856	0	0	2	0	0	0.2	0	Random Only
'ACHEe'	1	1	1	1	0.99971	0.00467856	0	0	2	0	0	0.2	0	Random Only
'ACHVESSEC'	1	1	1	1	0.99971	0.00467856	0	0	2	0	0	0.2	0	Random Only
'ACITL'	0.992822	0.0596155	1	1	0.99971	0.00467856	3	0	2	1.43541	0	0.2	0	Random Only
'ACN13ACNGALGBSIDEte'	1	1	1	1	0.99971	0.00467856	0	0	2	0	0	0.2	0	Random Only
'ACN13ACNGALGBSIDEtg'	1	1	1	1	0.99971	0.00467856	0	0	2	0	0	0.2	0	Random Only
'ACN23ACNGALGBSIDEte'	1	1	1	1	0.99971	0.00467856	0	0	2	0	0	0.2	0	Random Only
'ACN23ACNGALGBSIDEtg'	1	1	1	1	0.99971	0.00467856	0	0	2	0	0	0.2	0	Random Only
'ACNACNGAL14ACGLCGALGLUSIDEte'	1	1	1	1	0.99971	0.00467856	0	0	2	0	0	0.2	0	Random Only
'ACNACNGAL14ACGLCGALGLUSIDEtg'	1	1	1	1	0.99971	0.00467856	0	0	2	0	0	0.2	0	Random Only
'ACNACNGALGBSIDEte'	1	1	1	1	0.99971	0.00467856	0	0	2	0	0	0.2	0	Random Only
'ACNACNGALGBSIDEtg'	1	1	1	1	0.99971	0.00467856	0	0	2	0	0	0.2	0	Random Only
'ACNAM9PL'	0.992946	0.0585964	1	1	0.99971	0.00467856	3	0	2	1.43541	0	0.2	0	Random Only
'ACNAM9PL2'	0.992985	0.0582714	1	1	0.99971	0.00467856	3	0	2	1.43541	0	0.2	0	Random Only
'ACNAMPH'	0.992946	0.0585964	1	1	0.99971	0.00467856	3	0	2	1.43541	0	0.2	0	Random Only
'ACNAMlt'	0.992843	0.0594496	1	1	0.99971	0.00467856	3	0	2	1.43541	0	0.2	0	Random Only
'ACNAMtn'	0.992842	0.0594542	1	1	0.99971	0.00467856	3	0	2	1.43541	0	0.2	0	Random Only
'ACNGALACGLCGAL14ACGLCGALGLUSIDEte'	1	1	1	1	0.99971	0.00467856	0	0	2	0	0	0.2	0	Random Only
'ACNGALACGLCGAL14ACGLCGALGLUSIDEtg'	1	1	1	1	0.99971	0.00467856	0	0	2	0	0	0.2	0	Random Only
'ACNMLr'	0.992946	0.0585964	1	1	0.99971	0.00467856	3	0	2	1.43541	0	0.2	0	Random Only
'ACOAD10m'	1	1	1	1	0.99971	0.00467856	0	0	2	0	0	0.2	0	Random Only
'ACOAD1fm'	1	1	1	1	0.99971	0.00467856	0	0	2	0	0	0.2	0	Random Only
'ACOAD8m'	0.991099	0.0598552	1	1	0.999643	0.00495468	3	0	3	1.43541	0	0.3	0	Random Only
'ACOAD9m'	0.960794	0.0677867	1	1	0.99437	0.0116995	34	0	2	16.2679	0	0.2	0	Random Only
'ACOAHi'	0.992823	0.0596155	1	1	0.99971	0.00467856	3	0	2	1.43541	0	0.2	0	Random Only
'ACOAO7p'	1	1	1	1	0.99971	0.00467856	0	0	2	0	0	0.2	0	Random Only
'ACOATA'	1	1	1	1	0.99971	0.00467856	0	0	2	0	0	0.2	0	Random Only
'ACODA'	1	1	1	1	0.99971	0.00467856	0	0	2	0	0	0.2	0	Random Only
'ACONT'	0.996402	0.0298861	1	1	0.99971	0.00467856	3	0	2	1.43541	0	0.2	0	Random Only
'ACONTm'	0.991942	0.0592597	1	1	0.99971	0.00467856	3	0	2	1.43541	0	0.2	0	Random Only
'ACOX22x'	1	1	1	1	0.99971	0.00467856	0	0	2	0	0	0.2	0	Random Only
'ACOX2x'	1	1	1	1	0.99971	0.00467856	0	0	2	0	0	0.2	0	Random Only
'ACP1(FMN)'	0.992823	0.0596155	1	1	0.99971	0.00467856	3	0	2	1.43541	0	0.2	0	Random Only
'ACRNtm'	0.992823	0.0596155	1	1	0.99971	0.00467856	3	0	2	1.43541	0	0.2	0	Random Only
'ACS'	0.992823	0.0596155	1	1	0.99971	0.00467856	3	0	2	1.43541	0	0.2	0	Random Only
'ACS2'	1	1	1	1	0.99971	0.00467856	0	0	2	0	0	0.2	0	Random Only
'ACSm'	0.992823	0.0596155	1	1	0.99971	0.00467856	3	0	2	1.43541	0	0.2	0	Random Only
'ACTLMO'	0.999064	0.00766444	1	1	0.99971	0.00467856	3	0	2	1.43541	0	0.2	0	Random Only
'ACTNMO'	0.993867	0.0509482	1	1	0.99971	0.00467856	3	0	2	1.43541	0	0.2	0	Random Only
'ACYP'	0.992823	0.0596155	1	1	0.99971	0.00467856	3	0	2	1.43541	0	0.2	0	Random Only
'ACt2m'	0.992823	0.0596155	1	1	0.99971	0.00467856	3	0	2	1.43541	0	0.2	0	Random Only
'ACt2r'	0.992823	0.0596155	1	1	0.99971	0.00467856	3	0	2	1.43541	0	0.2	0	Random Only
'ACtg'	1	1	1	1	0.99971	0.00467856	0	0	2	0	0	0.2	0	Random Only
'ADA'	0.992828	0.0595777	1	1	0.99971	0.00467856	3	0	2	1.43541	0	0.2	0	Random Only
'ADAe'	0.992828	0.0595777	1	1	0.99971	0.00467856	3	0	2	1.43541	0	0.2	0	Random Only
'ADCim'	0.992807	0.0595957	1	1	0.99971	0.00467856	3	0	2	1.43541	0	0.2	0	Random Only
'ADEt'	0.955406	0.0641623	1	1	0.984347	0.0301926	29	0	134	13.8756	0	13.4	0	Random Only
'ADEtl'	1	1	1	1	0.99971	0.00467856	0	0	2	0	0	0.2	0	Random Only
'ADHAPtx'	1	1	1	1	0.99971	0.00467856	0	0	2	0	0	0.2	0	Random Only
'ADK1'	1	1	1	1	0.99971	0.00467856	0	0	2	0	0	0.2	0	Random Only
'ADK1m'	1	1	1	1	0.99971	0.00467856	0	0	2	0	0	0.2	0	Random Only
'ADK3'	1	1	1	1	0.99971	0.00467856	0	0	2	0	0	0.2	0	Random Only
'ADK3m'	1	1	1	1	0.99971	0.00467856	0	0	2	0	0	0.2	0	Random Only
'ADKd'	0.966319	0.0661224	1	1	0.989983	0.0241119	29	0	84	13.8756	0	8.4	0	Random Only
'ADMDC'	1	1	1	1	0.99971	0.00467856	0	0	2	0	0	0.2	0	Random Only
'ADNCYC'	0.992823	0.0596155	1	1	0.99971	0.00467856	3	0	2	1.43541	0	0.2	0	Random Only
'ADNK1'	0.992814	0.0596145	1	1	0.99971	0.00467856	3	0	2	1.43541	0	0.2	0	Random Only
'ADNK1m'	0.988969	0.056646	1	1	0.999084	0.00707999	10	0	6	4.78469	0	0.6	0	Random Only
'ADNt'	1	1	1	1	0.99971	0.00467856	0	0	2	0	0	0.2	0	Random Only
'ADNt4'	1	1	1	1	0.99971	0.00467856	0	0	2	0	0	0.2	0	Random Only
'ADNt5'	1	1	1	1	0.99971	0.00467856	0	0	2	0	0	0.2	0	Random Only
'ADNtl'	1	1	1	1	0.99971	0.00467856	0	0	2	0	0	0.2	0	Random Only
'ADNtm'	0.988969	0.056646	1	1	0.999084	0.00707999	10	0	6	4.78469	0	0.6	0	Random Only
'ADPGLC'	1	1	1	1	0.99971	0.00467856	0	0	2	0	0	0.2	0	Random Only
'ADPMAN'	1	1	1	1	0.99971	0.00467856	0	0	2	0	0	0.2	0	Random Only
'ADPRDP'	0.992823	0.0596155	1	1	0.99971	0.00467856	3	0	2	1.43541	0	0.2	0	Random Only
'ADPRDPm'	1	1	1	1	0.99971	0.00467856	0	0	2	0	0	0.2	0	Random Only
'ADPRIBt'	1	1	1	1	0.99971	0.00467856	0	0	2	0	0	0.2	0	Random Only
'ADPT'	0.992823	0.0596155	1	1	0.99971	0.00467856	3	0	2	1.43541	0	0.2	0	Random Only
'ADPtx'	0.992978	0.0574669	1	1	0.99971	0.00467856	3	0	2	1.43541	0	0.2	0	Random Only
'ADRNCOAtx'	1	1	1	1	0.99971	0.00467856	0	0	2	0	0	0.2	0	Random Only
'ADRNCPT1'	1	1	1	1	0.99971	0.00467856	0	0	2	0	0	0.2	0	Random Only
'ADRNCPT2'	1	1	1	1	0.99971	0.00467856	0	0	2	0	0	0.2	0	Random Only
'ADRNCRNt'	1	1	1	1	0.99971	0.00467856	0	0	2	0	0	0.2	0	Random Only
'ADRNLPVESSEC'	1	1	1	1	0.99971	0.00467856	0	0	2	0	0	0.2	0	Random Only
'ADRNt'	1	1	1	1	0.99971	0.00467856	0	0	2	0	0	0.2	0	Random Only
'ADSELK'	1	1	1	1	0.99971	0.00467856	0	0	2	0	0	0.2	0	Random Only
'ADSK'	0.992823	0.0596155	1	1	0.99971	0.00467856	3	0	2	1.43541	0	0.2	0	Random Only
'ADSL1'	0.697069	0.0567341	0.692966	0.000860449	0.79986	0.0903736	204	6000	925	97.6077	100	92.5	1	Both
'ADSL2'	0.669622	0.0291509	0.673823	0.000772387	0.742793	0.0708852	209	6000	994	100	100	99.4	1	Both
'ADSS'	0.697069	0.0567341	0.692966	0.000860449	0.79986	0.0903736	204	6000	925	97.6077	100	92.5	1	Both
'AFLATOXINte'	1	1	1	1	0.99971	0.00467856	0	0	2	0	0	0.2	0	Random Only
'AG13T10g'	1	1	1	1	0.99971	0.00467856	0	0	2	0	0	0.2	0	Random Only
'AG13T11g'	1	1	1	1	0.99971	0.00467856	0	0	2	0	0	0.2	0	Random Only
'AG13T12g'	1	1	1	1	0.99971	0.00467856	0	0	2	0	0	0.2	0	Random Only
'AG13T13g'	1	1	1	1	0.99971	0.00467856	0	0	2	0	0	0.2	0	Random Only
'AG13T14g'	1	1	1	1	0.99971	0.00467856	0	0	2	0	0	0.2	0	Random Only
'AG13T15g'	1	1	1	1	0.99971	0.00467856	0	0	2	0	0	0.2	0	Random Only
'AG13T16g'	1	1	1	1	0.99971	0.00467856	0	0	2	0	0	0.2	0	Random Only
'AG13T17g'	1	1	1	1	0.99971	0.00467856	0	0	2	0	0	0.2	0	Random Only
'AG13T18g'	1	1	1	1	0.99971	0.00467856	0	0	2	0	0	0.2	0	Random Only
'AG13T1g'	0.992843	0.0594496	1	1	0.99971	0.00467856	3	0	2	1.43541	0	0.2	0	Random Only
'AG13T2g'	0.992843	0.0594496	1	1	0.99971	0.00467856	3	0	2	1.43541	0	0.2	0	Random Only
'AG13T3g'	0.992843	0.0594496	1	1	0.99971	0.00467856	3	0	2	1.43541	0	0.2	0	Random Only
'AG13T4g'	1	1	1	1	0.99971	0.00467856	0	0	2	0	0	0.2	0	Random Only
'AG13T5g'	1	1	1	1	0.99971	0.00467856	0	0	2	0	0	0.2	0	Random Only
'AG13T6g'	1	1	1	1	0.99971	0.00467856	0	0	2	0	0	0.2	0	Random Only
'AG13T7g'	1	1	1	1	0.99971	0.00467856	0	0	2	0	0	0.2	0	Random Only
'AG13T8g'	1	1	1	1	0.99971	0.00467856	0	0	2	0	0	0.2	0	Random Only
'AG13T9g'	1	1	1	1	0.99971	0.00467856	0	0	2	0	0	0.2	0	Random Only
'AGLPC'	1	1	1	1	0.99971	0.00467856	0	0	2	0	0	0.2	0	Random Only
'AGLPED'	1	1	1	1	0.99971	0.00467856	0	0	2	0	0	0.2	0	Random Only
'AGLPET'	1	1	1	1	0.99971	0.00467856	0	0	2	0	0	0.2	0	Random Only
'AGLPH'	1	1	1	1	0.99971	0.00467856	0	0	2	0	0	0.2	0	Random Only
'AGLPR'	1	1	1	1	0.99971	0.00467856	0	0	2	0	0	0.2	0	Random Only
'AGLPT'	1	1	1	1	0.99971	0.00467856	0	0	2	0	0	0.2	0	Random Only
'AGMTm'	1	1	1	1	0.99971	0.00467856	0	0	2	0	0	0.2	0	Random Only
'AGPAT1'	1	1	1	1	0.99971	0.00467856	0	0	2	0	0	0.2	0	Random Only
'AGPRim'	1	1	1	1	0.99971	0.00467856	0	0	2	0	0	0.2	0	Random Only
'AGPSx'	1	1	1	1	0.99971	0.00467856	0	0	2	0	0	0.2	0	Random Only
'AGPex'	1	1	1	1	0.99971	0.00467856	0	0	2	0	0	0.2	0	Random Only
'AHANDROSTANGLCte'	1	1	1	1	0.99971	0.00467856	0	0	2	0	0	0.2	0	Random Only
'AHANDROSTANGLCtr'	1	1	1	1	0.99971	0.00467856	0	0	2	0	0	0.2	0	Random Only
'AHC'	0.980125	0.0690448	1	1	0.905833	0.0576296	23	0	734	11.0048	0	73.4	1	Random Only
'AHCYStn'	1	1	1	1	0.99971	0.00467856	0	0	2	0	0	0.2	0	Random Only
'AHCYStr'	0.992658	0.0584674	1	1	0.999642	0.00490847	3	0	2	1.43541	0	0.2	0	Random Only
'AHEXASE2ly'	0.992823	0.0596155	1	1	0.99971	0.00467856	3	0	2	1.43541	0	0.2	0	Random Only
'AHEXASEly'	1	1	1	1	0.99971	0.00467856	0	0	2	0	0	0.2	0	Random Only
'AICART'	0.669622	0.0291509	0.673823	0.000772387	0.742793	0.0708852	209	6000	994	100	100	99.4	1	Both
'AIRCr'	0.669622	0.0291509	0.673823	0.000772387	0.742793	0.0708852	209	6000	994	100	100	99.4	1	Both
'AK2LGCHOLt'	0.992823	0.0596155	1	1	0.99971	0.00467856	3	0	2	1.43541	0	0.2	0	Random Only
'AKGDm'	0.992823	0.0596155	1	1	0.99971	0.00467856	3	0	2	1.43541	0	0.2	0	Random Only
'AKGMALtm'	0.992815	0.0596147	1	1	0.99971	0.00467856	3	0	2	1.43541	0	0.2	0	Random Only
'AKGt4_3'	0.992365	0.059704	1	1	0.99971	0.00467856	3	0	2	1.43541	0	0.2	0	Random Only
'AKGtp'	1	1	1	1	0.99971	0.00467856	0	0	2	0	0	0.2	0	Random Only
'AKR1C41'	1	1	1	1	0.99971	0.00467856	0	0	2	0	0	0.2	0	Random Only
'AKR1C42'	1	1	1	1	0.99971	0.00467856	0	0	2	0	0	0.2	0	Random Only
'ALAASNNaEx'	1	1	1	1	0.99971	0.00467856	0	0	2	0	0	0.2	0	Random Only
'ALACYSNaEx'	1	1	1	1	0.99971	0.00467856	0	0	2	0	0	0.2	0	Random Only
'ALADGLNexR'	1	1	1	1	0.99971	0.00467856	0	0	2	0	0	0.2	0	Random Only
'ALADGLYexR'	1	1	1	1	0.99971	0.00467856	0	0	2	0	0	0.2	0	Random Only
'ALAGLNNaEx'	1	1	1	1	0.99971	0.00467856	0	0	2	0	0	0.2	0	Random Only
'ALAGLNexR'	1	1	1	1	0.99971	0.00467856	0	0	2	0	0	0.2	0	Random Only
'ALAGLYexR'	1	1	1	1	0.99971	0.00467856	0	0	2	0	0	0.2	0	Random Only
'ALAR'	0.985138	0.0636512	1	1	0.999147	0.00606149	14	0	4	6.69856	0	0.4	0	Random Only
'ALASERNaEx'	1	1	1	1	0.99971	0.00467856	0	0	2	0	0	0.2	0	Random Only
'ALASm'	1	1	1	1	0.99971	0.00467856	0	0	2	0	0	0.2	0	Random Only
'ALATA_L'	0.981965	0.0673144	1	1	0.999147	0.00606149	18	0	4	8.61244	0	0.4	0	Random Only
'ALATHRNaEx'	1	1	1	1	0.99971	0.00467856	0	0	2	0	0	0.2	0	Random Only
'ALAt2r'	1	1	1	1	0.99971	0.00467856	0	0	2	0	0	0.2	0	Random Only
'ALAt2rL'	1	1	1	1	0.99971	0.00467856	0	0	2	0	0	0.2	0	Random Only
'ALAt4'	1	1	1	1	0.99971	0.00467856	0	0	2	0	0	0.2	0	Random Only
'ALAtN1'	1	1	1	1	0.99971	0.00467856	0	0	2	0	0	0.2	0	Random Only
'ALCD1'	0.992819	0.0596151	1	1	0.99971	0.00467856	3	0	2	1.43541	0	0.2	0	Random Only
'ALCD21_D'	1	1	1	1	0.99971	0.00467856	0	0	2	0	0	0.2	0	Random Only
'ALCD21_L'	1	1	1	1	0.99971	0.00467856	0	0	2	0	0	0.2	0	Random Only
'ALCD22_D'	1	1	1	1	0.99971	0.00467856	0	0	2	0	0	0.2	0	Random Only
'ALCD22_L'	1	1	1	1	0.99971	0.00467856	0	0	2	0	0	0.2	0	Random Only
'ALCD2yf'	1	1	1	1	0.99971	0.00467856	0	0	2	0	0	0.2	0	Random Only
'ALDD20x'	1	1	1	1	0.99971	0.00467856	0	0	2	0	0	0.2	0	Random Only
'ALDD20xm'	1	1	1	1	0.99971	0.00467856	0	0	2	0	0	0.2	0	Random Only
'ALDD21'	1	1	1	1	0.99971	0.00467856	0	0	2	0	0	0.2	0	Random Only
'ALDD2x'	1	1	1	1	0.99971	0.00467856	0	0	2	0	0	0.2	0	Random Only
'ALDD2xm'	1	1	1	1	0.99971	0.00467856	0	0	2	0	0	0.2	0	Random Only
'ALDD2y'	1	1	1	1	0.99971	0.00467856	0	0	2	0	0	0.2	0	Random Only
'ALDSTRNte'	1	1	1	1	0.99971	0.00467856	0	0	2	0	0	0.2	0	Random Only
'ALKP'	1	1	1	1	0.99971	0.00467856	0	0	2	0	0	0.2	0	Random Only
'ALOX12'	1	1	1	1	0.99971	0.00467856	0	0	2	0	0	0.2	0	Random Only
'ALOX12R'	1	1	1	1	0.99971	0.00467856	0	0	2	0	0	0.2	0	Random Only
'ALOX15'	1	1	1	1	0.99971	0.00467856	0	0	2	0	0	0.2	0	Random Only
'ALOX5'	1	1	1	1	0.99971	0.00467856	0	0	2	0	0	0.2	0	Random Only
'ALOX52'	1	1	1	1	0.99971	0.00467856	0	0	2	0	0	0.2	0	Random Only
'ALR'	0.992946	0.0585964	1	1	0.99971	0.00467856	3	0	2	1.43541	0	0.2	0	Random Only
'ALR2'	1	1	1	1	0.99971	0.00467856	0	0	2	0	0	0.2	0	Random Only
'ALR3'	1	1	1	1	0.99971	0.00467856	0	0	2	0	0	0.2	0	Random Only
'AM6SAD'	1	1	1	1	0.99971	0.00467856	0	0	2	0	0	0.2	0	Random Only
'AMACR2p'	1	1	1	1	0.99971	0.00467856	0	0	2	0	0	0.2	0	Random Only
'AMACR2r'	1	1	1	1	0.99971	0.00467856	0	0	2	0	0	0.2	0	Random Only
'AMACRp'	1	1	1	1	0.99971	0.00467856	0	0	2	0	0	0.2	0	Random Only
'AMACRr'	1	1	1	1	0.99971	0.00467856	0	0	2	0	0	0.2	0	Random Only
'AMANK'	0.992946	0.0585964	1	1	0.99971	0.00467856	3	0	2	1.43541	0	0.2	0	Random Only
'AMCOXO'	1	1	1	1	0.99971	0.00467856	0	0	2	0	0	0.2	0	Random Only
'AMETr'	0.992658	0.0584674	1	1	0.999642	0.00490847	3	0	2	1.43541	0	0.2	0	Random Only
'AMETt2m'	0.992622	0.0590452	1	1	0.999664	0.00484431	3	0	2	1.43541	0	0.2	0	Random Only
'AMETtn'	1	1	1	1	0.99971	0.00467856	0	0	2	0	0	0.2	0	Random Only
'AMPDA'	0.992934	0.0586948	1	1	0.99971	0.00467856	3	0	2	1.43541	0	0.2	0	Random Only
'AMPTASECG'	0.992823	0.0596155	1	1	0.99971	0.00467856	3	0	2	1.43541	0	0.2	0	Random Only
'AMPTASECGe'	0.992823	0.0596155	1	1	0.99971	0.00467856	3	0	2	1.43541	0	0.2	0	Random Only
'AMPtp'	1	1	1	1	0.99971	0.00467856	0	0	2	0	0	0.2	0	Random Only
'AMPtr'	1	1	1	1	0.99971	0.00467856	0	0	2	0	0	0.2	0	Random Only
'AMY1e'	1	1	1	1	0.99971	0.00467856	0	0	2	0	0	0.2	0	Random Only
'AMY2e'	1	1	1	1	0.99971	0.00467856	0	0	2	0	0	0.2	0	Random Only
'ANDRSTRNGLCte'	1	1	1	1	0.99971	0.00467856	0	0	2	0	0	0.2	0	Random Only
'ANDRSTRNGLCtr'	1	1	1	1	0.99971	0.00467856	0	0	2	0	0	0.2	0	Random Only
'ANDRSTRNte'	1	1	1	1	0.99971	0.00467856	0	0	2	0	0	0.2	0	Random Only
'ANDRSTRNtr'	1	1	1	1	0.99971	0.00467856	0	0	2	0	0	0.2	0	Random Only
'AP4AH1'	1	1	1	1	0.99971	0.00467856	0	0	2	0	0	0.2	0	Random Only
'APAT2rm'	1	1	1	1	0.99971	0.00467856	0	0	2	0	0	0.2	0	Random Only
'APRTO2'	1	1	1	1	0.99971	0.00467856	0	0	2	0	0	0.2	0	Random Only
'AQCOBALt'	1	1	1	1	0.99971	0.00467856	0	0	2	0	0	0.2	0	Random Only
'ARAB-Lt'	1	1	1	1	0.99971	0.00467856	0	0	2	0	0	0.2	0	Random Only
'ARABR'	1	1	1	1	0.99971	0.00467856	0	0	2	0	0	0.2	0	Random Only
'ARACHCOAtx'	1	1	1	1	0.99971	0.00467856	0	0	2	0	0	0.2	0	Random Only
'ARACHCPT1'	1	1	1	1	0.99971	0.00467856	0	0	2	0	0	0.2	0	Random Only
'ARACHCPT2'	1	1	1	1	0.99971	0.00467856	0	0	2	0	0	0.2	0	Random Only
'ARACHCRNt'	1	1	1	1	0.99971	0.00467856	0	0	2	0	0	0.2	0	Random Only
'ARACHDCOAtx'	1	1	1	1	0.99971	0.00467856	0	0	2	0	0	0.2	0	Random Only
'ARACHDt2'	1	1	1	1	0.99971	0.00467856	0	0	2	0	0	0.2	0	Random Only
'ARACHDtr'	1	1	1	1	0.99971	0.00467856	0	0	2	0	0	0.2	0	Random Only
'ARACHt'	1	1	1	1	0.99971	0.00467856	0	0	2	0	0	0.2	0	Random Only
'ARGDCm'	1	1	1	1	0.99971	0.00467856	0	0	2	0	0	0.2	0	Random Only
'ARGLYSex'	1	1	1	1	0.99971	0.00467856	0	0	2	0	0	0.2	0	Random Only
'ARGN'	0.962433	0.0642291	1	1	0.98738	0.02661	28	0	111	13.3971	0	11.1	0	Random Only
'ARGNm'	0.962433	0.0642291	1	1	0.98738	0.02661	28	0	111	13.3971	0	11.1	0	Random Only
'ARGSL'	0.991513	0.0566888	1	1	0.998835	0.00812866	3	0	7	1.43541	0	0.7	0	Random Only
'ARGSS'	0.991513	0.0566888	1	1	0.998835	0.00812866	3	0	7	1.43541	0	0.7	0	Random Only
'ARGt4'	1	1	1	1	0.99971	0.00467856	0	0	2	0	0	0.2	0	Random Only
'ARGtiDF'	1	1	1	1	0.99971	0.00467856	0	0	2	0	0	0.2	0	Random Only
'ARGtm'	0.962433	0.0642291	1	1	0.98738	0.02661	28	0	111	13.3971	0	11.1	0	Random Only
'ARSA'	1	1	1	1	0.99971	0.00467856	0	0	2	0	0	0.2	0	Random Only
'ARTCOAL1'	0.995484	0.0407169	1	1	0.99971	0.00467856	3	0	2	1.43541	0	0.2	0	Random Only
'ARTCOAL2'	0.995484	0.0407169	1	1	0.99971	0.00467856	3	0	2	1.43541	0	0.2	0	Random Only
'ARTCOAL3'	0.995484	0.0407169	1	1	0.99971	0.00467856	3	0	2	1.43541	0	0.2	0	Random Only
'ARTFR11'	1	1	1	1	0.99971	0.00467856	0	0	2	0	0	0.2	0	Random Only
'ARTFR12'	1	1	1	1	0.99971	0.00467856	0	0	2	0	0	0.2	0	Random Only
'ARTFR13'	0.993081	0.0573078	1	1	0.99971	0.00467856	3	0	2	1.43541	0	0.2	0	Random Only
'ARTFR202'	1	1	1	1	0.99971	0.00467856	0	0	2	0	0	0.2	0	Random Only
'ARTFR203'	1	1	1	1	0.99971	0.00467856	0	0	2	0	0	0.2	0	Random Only
'ARTFR204'	1	1	1	1	0.99971	0.00467856	0	0	2	0	0	0.2	0	Random Only
'ARTFR205'	1	1	1	1	0.99971	0.00467856	0	0	2	0	0	0.2	0	Random Only
'ARTFR206'	1	1	1	1	0.99971	0.00467856	0	0	2	0	0	0.2	0	Random Only
'ARTFR207'	1	1	1	1	0.99971	0.00467856	0	0	2	0	0	0.2	0	Random Only
'ARTFR208'	1	1	1	1	0.99971	0.00467856	0	0	2	0	0	0.2	0	Random Only
'ARTFR209'	1	1	1	1	0.99971	0.00467856	0	0	2	0	0	0.2	0	Random Only
'ARTFR210'	1	1	1	1	0.99971	0.00467856	0	0	2	0	0	0.2	0	Random Only
'ARTFR211'	1	1	1	1	0.99971	0.00467856	0	0	2	0	0	0.2	0	Random Only
'ARTFR212'	1	1	1	1	0.99971	0.00467856	0	0	2	0	0	0.2	0	Random Only
'ARTFR213'	1	1	1	1	0.99971	0.00467856	0	0	2	0	0	0.2	0	Random Only
'ARTFR31'	0.993162	0.0568046	1	1	0.99971	0.00467856	3	0	2	1.43541	0	0.2	0	Random Only
'ARTFR32'	0.992964	0.0582806	1	1	0.99971	0.00467856	3	0	2	1.43541	0	0.2	0	Random Only
'ARTFR33'	0.993	0.0581466	1	1	0.99971	0.00467856	3	0	2	1.43541	0	0.2	0	Random Only
'ARTFR34'	0.993005	0.0581043	1	1	0.99971	0.00467856	3	0	2	1.43541	0	0.2	0	Random Only
'ARTFR41'	1	1	1	1	0.99971	0.00467856	0	0	2	0	0	0.2	0	Random Only
'ARTFR42'	0.992964	0.0582806	1	1	0.99971	0.00467856	3	0	2	1.43541	0	0.2	0	Random Only
'ARTFR43'	0.993	0.0581466	1	1	0.99971	0.00467856	3	0	2	1.43541	0	0.2	0	Random Only
'ARTFR44'	0.993005	0.0581043	1	1	0.99971	0.00467856	3	0	2	1.43541	0	0.2	0	Random Only
'ARTFR45'	1	1	1	1	0.99971	0.00467856	0	0	2	0	0	0.2	0	Random Only
'ARTFR46'	0.993	0.0581466	1	1	0.99971	0.00467856	3	0	2	1.43541	0	0.2	0	Random Only
'ARTFR61'	1	1	1	1	0.99971	0.00467856	0	0	2	0	0	0.2	0	Random Only
'ARTPLM1'	0.993327	0.0554325	1	1	0.99971	0.00467856	3	0	2	1.43541	0	0.2	0	Random Only
'ARTPLM1m'	0.994232	0.0495143	1	1	0.99971	0.00467856	3	0	2	1.43541	0	0.2	0	Random Only
'ARTPLM2'	0.993232	0.0561842	1	1	0.99971	0.00467856	3	0	2	1.43541	0	0.2	0	Random Only
'ARTPLM2m'	0.994232	0.0495143	1	1	0.99971	0.00467856	3	0	2	1.43541	0	0.2	0	Random Only
'ARTPLM3'	0.99324	0.0561851	1	1	0.99971	0.00467856	3	0	2	1.43541	0	0.2	0	Random Only
'ARTPLM3m'	0.994232	0.0495143	1	1	0.99971	0.00467856	3	0	2	1.43541	0	0.2	0	Random Only
'ASAH1'	0.99266	0.0583082	1	1	0.999607	0.00505334	3	0	3	1.43541	0	0.3	0	Random Only
'ASCBOX'	0.992823	0.0596155	1	1	0.99971	0.00467856	3	0	2	1.43541	0	0.2	0	Random Only
'ASCBt'	1	1	1	1	0.99971	0.00467856	0	0	2	0	0	0.2	0	Random Only
'ASCBt4'	1	1	1	1	0.99971	0.00467856	0	0	2	0	0	0.2	0	Random Only
'ASNALANaEx'	1	1	1	1	0.99971	0.00467856	0	0	2	0	0	0.2	0	Random Only
'ASNCYSNaEx'	1	1	1	1	0.99971	0.00467856	0	0	2	0	0	0.2	0	Random Only
'ASNGLNNaEx'	1	1	1	1	0.99971	0.00467856	0	0	2	0	0	0.2	0	Random Only
'ASNNm'	0.992957	0.0585019	1	1	0.99971	0.00467856	3	0	2	1.43541	0	0.2	0	Random Only
'ASNS1'	0.991137	0.0606228	1	1	0.996584	0.0143273	7	0	22	3.34928	0	2.2	0	Random Only
'ASNSERNaEx'	1	1	1	1	0.99971	0.00467856	0	0	2	0	0	0.2	0	Random Only
'ASNTHRNaEx'	1	1	1	1	0.99971	0.00467856	0	0	2	0	0	0.2	0	Random Only
'ASNt4'	1	1	1	1	0.99971	0.00467856	0	0	2	0	0	0.2	0	Random Only
'ASNtN1'	1	1	1	1	0.99971	0.00467856	0	0	2	0	0	0.2	0	Random Only
'ASNtm'	0.992957	0.0585019	1	1	0.99971	0.00467856	3	0	2	1.43541	0	0.2	0	Random Only
'ASPCTr'	0.664385	0.0282508	0.668456	0.000748539	0.735323	0.0687987	209	6000	997	100	100	99.7	1	Both
'ASPDt6'	1	1	1	1	0.99971	0.00467856	0	0	2	0	0	0.2	0	Random Only
'ASPDxt'	1	1	1	1	0.99971	0.00467856	0	0	2	0	0	0.2	0	Random Only
'ASPGLUm'	0.992787	0.0595777	1	1	0.99971	0.00467856	3	0	2	1.43541	0	0.2	0	Random Only
'ASPTA'	0.992822	0.0595793	1	1	0.99971	0.00467856	3	0	2	1.43541	0	0.2	0	Random Only
'ASPTAm'	0.992787	0.0595777	1	1	0.99971	0.00467856	3	0	2	1.43541	0	0.2	0	Random Only
'ASPt6'	1	1	1	1	0.99971	0.00467856	0	0	2	0	0	0.2	0	Random Only
'ATP1ter'	1	1	1	1	0.99971	0.00467856	0	0	2	0	0	0.2	0	Random Only
'ATP2ter'	1	1	1	1	0.99971	0.00467856	0	0	2	0	0	0.2	0	Random Only
'ATPH1e'	1	1	1	1	0.99971	0.00467856	0	0	2	0	0	0.2	0	Random Only
'ATPH2e'	1	1	1	1	0.99971	0.00467856	0	0	2	0	0	0.2	0	Random Only
'ATPS4m'	0.992809	0.0596141	1	1	0.99971	0.00467856	3	0	2	1.43541	0	0.2	0	Random Only
'ATPasel'	0.992829	0.0595664	1	1	0.99971	0.00467856	3	0	2	1.43541	0	0.2	0	Random Only
'ATPtm'	1	1	1	1	0.99971	0.00467856	0	0	2	0	0	0.2	0	Random Only
'ATPtn'	0.992766	0.0596115	1	1	0.99971	0.00467856	3	0	2	1.43541	0	0.2	0	Random Only
'ATPtx'	0.992978	0.0574669	1	1	0.99971	0.00467856	3	0	2	1.43541	0	0.2	0	Random Only
'AVITE1t'	1	1	1	1	0.99971	0.00467856	0	0	2	0	0	0.2	0	Random Only
'AVITE2t'	1	1	1	1	0.99971	0.00467856	0	0	2	0	0	0.2	0	Random Only
'A_MANASE'	1	1	1	1	0.99971	0.00467856	0	0	2	0	0	0.2	0	Random Only
'A_MANASEly'	0.992823	0.0596155	1	1	0.99971	0.00467856	3	0	2	1.43541	0	0.2	0	Random Only
'Asn-X-Ser/Thrtr'	0.992823	0.0596155	1	1	0.99971	0.00467856	3	0	2	1.43541	0	0.2	0	Random Only
'B3GALT3g'	1	1	1	1	0.99971	0.00467856	0	0	2	0	0	0.2	0	Random Only
'B3GALT41g'	1	1	1	1	0.99971	0.00467856	0	0	2	0	0	0.2	0	Random Only
'B3GALT42g'	1	1	1	1	0.99971	0.00467856	0	0	2	0	0	0.2	0	Random Only
'B3GALT43g'	1	1	1	1	0.99971	0.00467856	0	0	2	0	0	0.2	0	Random Only
'B3GALT44g'	1	1	1	1	0.99971	0.00467856	0	0	2	0	0	0.2	0	Random Only
'B3GNT11g'	1	1	1	1	0.99971	0.00467856	0	0	2	0	0	0.2	0	Random Only
'B3GNT12g'	1	1	1	1	0.99971	0.00467856	0	0	2	0	0	0.2	0	Random Only
'B3GNT51g'	1	1	1	1	0.99971	0.00467856	0	0	2	0	0	0.2	0	Random Only
'BALAVECSEC'	1	1	1	1	0.99971	0.00467856	0	0	2	0	0	0.2	0	Random Only
'BALAtmr'	1	1	1	1	0.99971	0.00467856	0	0	2	0	0	0.2	0	Random Only
'BAMPPALDOX'	1	1	1	1	0.99971	0.00467856	0	0	2	0	0	0.2	0	Random Only
'BAMPPALDOXm'	1	1	1	1	0.99971	0.00467856	0	0	2	0	0	0.2	0	Random Only
'BBHOX'	1	1	1	1	0.99971	0.00467856	0	0	2	0	0	0.2	0	Random Only
'BDHm'	0.993141	0.0570982	1	1	0.99971	0.00467856	3	0	2	1.43541	0	0.2	0	Random Only
'BDMT_L'	0.992823	0.0596155	1	1	0.99971	0.00467856	3	0	2	1.43541	0	0.2	0	Random Only
'BDMT_U'	0.992823	0.0596155	1	1	0.99971	0.00467856	3	0	2	1.43541	0	0.2	0	Random Only
'BETALDHx'	1	1	1	1	0.99971	0.00467856	0	0	2	0	0	0.2	0	Random Only
'BETALDHxm'	0.992658	0.0590226	1	1	0.99966	0.00485557	3	0	2	1.43541	0	0.2	0	Random Only
'BHBt'	0.993141	0.0570982	1	1	0.99971	0.00467856	3	0	2	1.43541	0	0.2	0	Random Only
'BHBtm'	0.993141	0.0570982	1	1	0.99971	0.00467856	3	0	2	1.43541	0	0.2	0	Random Only
'BILDGLCURt'	0.992823	0.0596155	1	1	0.99971	0.00467856	3	0	2	1.43541	0	0.2	0	Random Only
'BILDGLCURte'	0.992823	0.0596155	1	1	0.99971	0.00467856	3	0	2	1.43541	0	0.2	0	Random Only
'BILDGLCURtr'	1	1	1	1	0.99971	0.00467856	0	0	2	0	0	0.2	0	Random Only
'BILGLCURt'	0.992823	0.0596155	1	1	0.99971	0.00467856	3	0	2	1.43541	0	0.2	0	Random Only
'BILGLCURte'	0.992823	0.0596155	1	1	0.99971	0.00467856	3	0	2	1.43541	0	0.2	0	Random Only
'BILGLCURtr'	1	1	1	1	0.99971	0.00467856	0	0	2	0	0	0.2	0	Random Only
'BILIRED'	1	1	1	1	0.99971	0.00467856	0	0	2	0	0	0.2	0	Random Only
'BILIRUBt2'	1	1	1	1	0.99971	0.00467856	0	0	2	0	0	0.2	0	Random Only
'BILIRUBtr'	1	1	1	1	0.99971	0.00467856	0	0	2	0	0	0.2	0	Random Only
'BIOCYTtn'	1	1	1	1	0.99971	0.00467856	0	0	2	0	0	0.2	0	Random Only
'BMTer_L'	1	1	1	1	0.99971	0.00467856	0	0	2	0	0	0.2	0	Random Only
'BMTer_U'	1	1	1	1	0.99971	0.00467856	0	0	2	0	0	0.2	0	Random Only
'BPNT'	0.992823	0.0596155	1	1	0.99971	0.00467856	3	0	2	1.43541	0	0.2	0	Random Only
'BPNT2'	0.992823	0.0596155	1	1	0.99971	0.00467856	3	0	2	1.43541	0	0.2	0	Random Only
'BTND1'	1	1	1	1	0.99971	0.00467856	0	0	2	0	0	0.2	0	Random Only
'BTND1n'	1	1	1	1	0.99971	0.00467856	0	0	2	0	0	0.2	0	Random Only
'BTNDe'	1	1	1	1	0.99971	0.00467856	0	0	2	0	0	0.2	0	Random Only
'BTNDm'	1	1	1	1	0.99971	0.00467856	0	0	2	0	0	0.2	0	Random Only
'BTNPL'	1	1	1	1	0.99971	0.00467856	0	0	2	0	0	0.2	0	Random Only
'BTNPLm'	1	1	1	1	0.99971	0.00467856	0	0	2	0	0	0.2	0	Random Only
'BTNt2'	1	1	1	1	0.99971	0.00467856	0	0	2	0	0	0.2	0	Random Only
'BTNt2m'	1	1	1	1	0.99971	0.00467856	0	0	2	0	0	0.2	0	Random Only
'BTNt3i'	0.992823	0.0596155	1	1	0.99971	0.00467856	3	0	2	1.43541	0	0.2	0	Random Only
'BTNt4i'	1	1	1	1	0.99971	0.00467856	0	0	2	0	0	0.2	0	Random Only
'BTNtn'	1	1	1	1	0.99971	0.00467856	0	0	2	0	0	0.2	0	Random Only
'BUTt2m'	1	1	1	1	0.99971	0.00467856	0	0	2	0	0	0.2	0	Random Only
'BUTt2r'	1	1	1	1	0.99971	0.00467856	0	0	2	0	0	0.2	0	Random Only
'BVITEt'	1	1	1	1	0.99971	0.00467856	0	0	2	0	0	0.2	0	Random Only
'BZt'	1	1	1	1	0.99971	0.00467856	0	0	2	0	0	0.2	0	Random Only
'BZtr'	1	1	1	1	0.99971	0.00467856	0	0	2	0	0	0.2	0	Random Only
'B_MANNASEly'	0.992823	0.0596155	1	1	0.99971	0.00467856	3	0	2	1.43541	0	0.2	0	Random Only
'C14STRr'	0.992978	0.0574669	1	1	0.99971	0.00467856	3	0	2	1.43541	0	0.2	0	Random Only
'C160CPT1'	1	1	1	1	0.99971	0.00467856	0	0	2	0	0	0.2	0	Random Only
'C160CPT2'	1	1	1	1	0.99971	0.00467856	0	0	2	0	0	0.2	0	Random Only
'C160CRNt'	1	1	1	1	0.99971	0.00467856	0	0	2	0	0	0.2	0	Random Only
'C161CPT1'	1	1	1	1	0.99971	0.00467856	0	0	2	0	0	0.2	0	Random Only
'C161CPT12'	1	1	1	1	0.99971	0.00467856	0	0	2	0	0	0.2	0	Random Only
'C161CPT2'	1	1	1	1	0.99971	0.00467856	0	0	2	0	0	0.2	0	Random Only
'C161CPT22'	1	1	1	1	0.99971	0.00467856	0	0	2	0	0	0.2	0	Random Only
'C161CRN2t'	1	1	1	1	0.99971	0.00467856	0	0	2	0	0	0.2	0	Random Only
'C161CRNt'	1	1	1	1	0.99971	0.00467856	0	0	2	0	0	0.2	0	Random Only
'C180CPT1'	0.992442	0.0596108	1	1	0.99971	0.00467856	3	0	2	1.43541	0	0.2	0	Random Only
'C180CPT2'	0.992442	0.0596108	1	1	0.99971	0.00467856	3	0	2	1.43541	0	0.2	0	Random Only
'C180CRNt'	0.992442	0.0596108	1	1	0.99971	0.00467856	3	0	2	1.43541	0	0.2	0	Random Only
'C181CPT1'	0.994203	0.0497145	1	1	0.99971	0.00467856	3	0	2	1.43541	0	0.2	0	Random Only
'C181CPT2'	0.994203	0.0497145	1	1	0.99971	0.00467856	3	0	2	1.43541	0	0.2	0	Random Only
'C181CRNt'	0.994203	0.0497145	1	1	0.99971	0.00467856	3	0	2	1.43541	0	0.2	0	Random Only
'C204CPT1'	1	1	1	1	0.99971	0.00467856	0	0	2	0	0	0.2	0	Random Only
'C204CPT2'	1	1	1	1	0.99971	0.00467856	0	0	2	0	0	0.2	0	Random Only
'C204CRNt'	1	1	1	1	0.99971	0.00467856	0	0	2	0	0	0.2	0	Random Only
'C226COAtx'	1	1	1	1	0.99971	0.00467856	0	0	2	0	0	0.2	0	Random Only
'C226CPT1'	1	1	1	1	0.99971	0.00467856	0	0	2	0	0	0.2	0	Random Only
'C226CPT2'	1	1	1	1	0.99971	0.00467856	0	0	2	0	0	0.2	0	Random Only
'C226CRNt'	1	1	1	1	0.99971	0.00467856	0	0	2	0	0	0.2	0	Random Only
'C2M26DCOAHLm'	1	1	1	1	0.99971	0.00467856	0	0	2	0	0	0.2	0	Random Only
'C2M26DCOAHLx'	1	1	1	1	0.99971	0.00467856	0	0	2	0	0	0.2	0	Random Only
'C3STDH1Pr'	0.992978	0.0574669	1	1	0.99971	0.00467856	3	0	2	1.43541	0	0.2	0	Random Only
'C3STDH1r'	0.992978	0.0574669	1	1	0.99971	0.00467856	3	0	2	1.43541	0	0.2	0	Random Only
'C3STKR2r'	0.992978	0.0574669	1	1	0.99971	0.00467856	3	0	2	1.43541	0	0.2	0	Random Only
'C4STMO1r'	0.992978	0.0574669	1	1	0.99971	0.00467856	3	0	2	1.43541	0	0.2	0	Random Only
'C4STMO2Pr'	0.992978	0.0574669	1	1	0.99971	0.00467856	3	0	2	1.43541	0	0.2	0	Random Only
'C4STMO2r'	0.992978	0.0574669	1	1	0.99971	0.00467856	3	0	2	1.43541	0	0.2	0	Random Only
'CAATPS'	0.992823	0.0596155	1	1	0.99971	0.00467856	3	0	2	1.43541	0	0.2	0	Random Only
'CAMPt'	0.95667	0.0644552	1	1	0.984729	0.0298381	29	0	132	13.8756	0	13.2	0	Random Only
'CAT2p'	1	1	1	1	0.99971	0.00467856	0	0	2	0	0	0.2	0	Random Only
'CATm'	0.992823	0.0596155	1	1	0.99971	0.00467856	3	0	2	1.43541	0	0.2	0	Random Only
'CATp'	0.992823	0.0596155	1	1	0.99971	0.00467856	3	0	2	1.43541	0	0.2	0	Random Only
'CAt7r'	1	1	1	1	0.99971	0.00467856	0	0	2	0	0	0.2	0	Random Only
'CBL2OR'	1	1	1	1	0.99971	0.00467856	0	0	2	0	0	0.2	0	Random Only
'CBL2tm'	1	1	1	1	0.99971	0.00467856	0	0	2	0	0	0.2	0	Random Only
'CBLATm'	1	1	1	1	0.99971	0.00467856	0	0	2	0	0	0.2	0	Random Only
'CBPPer'	1	1	1	1	0.99971	0.00467856	0	0	2	0	0	0.2	0	Random Only
'CBPS'	0.664385	0.0282508	0.668456	0.000748539	0.735323	0.0687987	209	6000	997	100	100	99.7	1	Both
'CBPSam'	0.955254	0.0641372	1	1	0.984347	0.0301926	29	0	134	13.8756	0	13.4	0	Random Only
'CBPter'	1	1	1	1	0.99971	0.00467856	0	0	2	0	0	0.2	0	Random Only
'CBR1'	1	1	1	1	0.99971	0.00467856	0	0	2	0	0	0.2	0	Random Only
'CBR2'	1	1	1	1	0.99971	0.00467856	0	0	2	0	0	0.2	0	Random Only
'CCA_D3t'	1	1	1	1	0.99971	0.00467856	0	0	2	0	0	0.2	0	Random Only
'CDIPTr'	0.992822	0.0596154	1	1	0.99971	0.00467856	3	0	2	1.43541	0	0.2	0	Random Only
'CDPDAGtm'	0.992703	0.0590672	1	1	0.999681	0.0047665	3	0	2	1.43541	0	0.2	0	Random Only
'CDS'	0.99282	0.0596152	1	1	0.99971	0.00467856	3	0	2	1.43541	0	0.2	0	Random Only
'CDSm'	0.992703	0.0590672	1	1	0.999681	0.0047665	3	0	2	1.43541	0	0.2	0	Random Only
'CEPTC'	0.992812	0.0596143	1	1	0.99971	0.00467856	3	0	2	1.43541	0	0.2	0	Random Only
'CEPTE'	0.992813	0.0596144	1	1	0.99971	0.00467856	3	0	2	1.43541	0	0.2	0	Random Only
'CERK'	0.995733	0.0287599	1	1	0.999084	0.00708116	3	0	6	1.43541	0	0.6	0	Random Only
'CERT1gt'	0.992823	0.0596155	1	1	0.99971	0.00467856	3	0	2	1.43541	0	0.2	0	Random Only
'CERT1rt'	0.992823	0.0596155	1	1	0.99971	0.00467856	3	0	2	1.43541	0	0.2	0	Random Only
'CERT2gt'	1	1	1	1	0.99971	0.00467856	0	0	2	0	0	0.2	0	Random Only
'CERT2rt'	0.992823	0.0596155	1	1	0.99971	0.00467856	3	0	2	1.43541	0	0.2	0	Random Only
'CGLYt3(2)'	0.992823	0.0596155	1	1	0.99971	0.00467856	3	0	2	1.43541	0	0.2	0	Random Only
'CGMPt'	0.961242	0.06509	1	1	0.987539	0.0270411	29	0	107	13.8756	0	10.7	0	Random Only
'CHLP'	0.992823	0.0596155	1	1	0.99971	0.00467856	3	0	2	1.43541	0	0.2	0	Random Only
'CHLPCTD'	0.992812	0.0596143	1	1	0.99971	0.00467856	3	0	2	1.43541	0	0.2	0	Random Only
'CHLtm'	0.992625	0.0590737	1	1	0.99966	0.00485557	3	0	2	1.43541	0	0.2	0	Random Only
'CHOLATEt'	1	1	1	1	0.99971	0.00467856	0	0	2	0	0	0.2	0	Random Only
'CHOLATEt2'	1	1	1	1	0.99971	0.00467856	0	0	2	0	0	0.2	0	Random Only
'CHOLD2m'	0.992658	0.0590226	1	1	0.99966	0.00485557	3	0	2	1.43541	0	0.2	0	Random Only
'CHOLK'	0.992818	0.0596149	1	1	0.99971	0.00467856	3	0	2	1.43541	0	0.2	0	Random Only
'CHOLPtg'	0.992823	0.0596155	1	1	0.99971	0.00467856	3	0	2	1.43541	0	0.2	0	Random Only
'CHOLPtl'	0.99266	0.0583082	1	1	0.999607	0.00505334	3	0	3	1.43541	0	0.3	0	Random Only
'CHOLt4'	1	1	1	1	0.99971	0.00467856	0	0	2	0	0	0.2	0	Random Only
'CHOLtg'	0.992823	0.0596155	1	1	0.99971	0.00467856	3	0	2	1.43541	0	0.2	0	Random Only
'CHOLtn'	1	1	1	1	0.99971	0.00467856	0	0	2	0	0	0.2	0	Random Only
'CHOLtr'	0.992823	0.0596155	1	1	0.99971	0.00467856	3	0	2	1.43541	0	0.2	0	Random Only
'CHOLtu'	1	1	1	1	0.99971	0.00467856	0	0	2	0	0	0.2	0	Random Only
'CHSTEROLSULT'	0.992823	0.0596155	1	1	0.99971	0.00467856	3	0	2	1.43541	0	0.2	0	Random Only
'CHSTEROLt'	0.993079	0.0574897	1	1	0.99971	0.00467856	3	0	2	1.43541	0	0.2	0	Random Only
'CHSTEROLt1'	1	1	1	1	0.99971	0.00467856	0	0	2	0	0	0.2	0	Random Only
'CHSTEROLt2'	0.992974	0.0574869	1	1	0.99971	0.00467856	3	0	2	1.43541	0	0.2	0	Random Only
'CHSTEROLt3'	0.992974	0.0574869	1	1	0.99971	0.00467856	3	0	2	1.43541	0	0.2	0	Random Only
'CHSTEROLtg'	1	1	1	1	0.99971	0.00467856	0	0	2	0	0	0.2	0	Random Only
'CHTNASE'	1	1	1	1	0.99971	0.00467856	0	0	2	0	0	0.2	0	Random Only
'CHTNASEe'	1	1	1	1	0.99971	0.00467856	0	0	2	0	0	0.2	0	Random Only
'CITL'	0.992823	0.0596155	1	1	0.99971	0.00467856	3	0	2	1.43541	0	0.2	0	Random Only
'CITRtm'	1	1	1	1	0.99971	0.00467856	0	0	2	0	0	0.2	0	Random Only
'CITt4_2'	1	1	1	1	0.99971	0.00467856	0	0	2	0	0	0.2	0	Random Only
'CITt4_4'	1	1	1	1	0.99971	0.00467856	0	0	2	0	0	0.2	0	Random Only
'CITtam'	0.994138	0.0486852	1	1	0.99971	0.00467856	3	0	2	1.43541	0	0.2	0	Random Only
'CITtbm'	0.99128	0.0599056	1	1	0.999696	0.00468542	3	0	2	1.43541	0	0.2	0	Random Only
'CK'	1	1	1	1	0.99971	0.00467856	0	0	2	0	0	0.2	0	Random Only
'CKc'	1	1	1	1	0.99971	0.00467856	0	0	2	0	0	0.2	0	Random Only
'CLFORtex'	0.993024	0.0579436	1	1	0.99971	0.00467856	3	0	2	1.43541	0	0.2	0	Random Only
'CLFORtex2'	0.993024	0.0579436	1	1	0.99971	0.00467856	3	0	2	1.43541	0	0.2	0	Random Only
'CLHCO3tex2'	1	1	1	1	0.99971	0.00467856	0	0	2	0	0	0.2	0	Random Only
'CLHCOtex'	1	1	1	1	0.99971	0.00467856	0	0	2	0	0	0.2	0	Random Only
'CLI2tex'	1	1	1	1	0.99971	0.00467856	0	0	2	0	0	0.2	0	Random Only
'CLOHtex2'	1	1	1	1	0.99971	0.00467856	0	0	2	0	0	0.2	0	Random Only
'CLOXAtex2'	1	1	1	1	0.99971	0.00467856	0	0	2	0	0	0.2	0	Random Only
'CLPNDCOAtx'	1	1	1	1	0.99971	0.00467856	0	0	2	0	0	0.2	0	Random Only
'CLPNDCPT1'	1	1	1	1	0.99971	0.00467856	0	0	2	0	0	0.2	0	Random Only
'CLPNDCPT2'	1	1	1	1	0.99971	0.00467856	0	0	2	0	0	0.2	0	Random Only
'CLPNDCRNt'	1	1	1	1	0.99971	0.00467856	0	0	2	0	0	0.2	0	Random Only
'CLPNDt'	1	1	1	1	0.99971	0.00467856	0	0	2	0	0	0.2	0	Random Only
'CLS_hs'	1	1	1	1	0.99971	0.00467856	0	0	2	0	0	0.2	0	Random Only
'CMPACNAtg'	0.992843	0.0594496	1	1	0.99971	0.00467856	3	0	2	1.43541	0	0.2	0	Random Only
'CMPACNAtn'	0.992842	0.0594542	1	1	0.99971	0.00467856	3	0	2	1.43541	0	0.2	0	Random Only
'CMPSAS'	0.992843	0.0594496	1	1	0.99971	0.00467856	3	0	2	1.43541	0	0.2	0	Random Only
'CMPSASn'	0.992842	0.0594542	1	1	0.99971	0.00467856	3	0	2	1.43541	0	0.2	0	Random Only
'CO2t'	0.992904	0.0571741	1	1	0.99971	0.00467856	3	0	2	1.43541	0	0.2	0	Random Only
'CO2ter'	0.992978	0.0574669	1	1	0.99971	0.00467856	3	0	2	1.43541	0	0.2	0	Random Only
'CO2tg'	1	1	1	1	0.99971	0.00467856	0	0	2	0	0	0.2	0	Random Only
'CO2tm'	0.992743	0.0589295	1	1	0.99971	0.00467856	3	0	2	1.43541	0	0.2	0	Random Only
'CO2tn'	1	1	1	1	0.99971	0.00467856	0	0	2	0	0	0.2	0	Random Only
'CO2tp'	0.992978	0.0574669	1	1	0.99971	0.00467856	3	0	2	1.43541	0	0.2	0	Random Only
'COAtg'	1	1	1	1	0.99971	0.00467856	0	0	2	0	0	0.2	0	Random Only
'COAtl'	1	1	1	1	0.99971	0.00467856	0	0	2	0	0	0.2	0	Random Only
'COAtm'	0.992819	0.059615	1	1	0.99971	0.00467856	3	0	2	1.43541	0	0.2	0	Random Only
'COAtn'	1	1	1	1	0.99971	0.00467856	0	0	2	0	0	0.2	0	Random Only
'COAtp'	0.993457	0.0543158	1	1	0.99971	0.00467856	3	0	2	1.43541	0	0.2	0	Random Only
'COAtr'	1	1	1	1	0.99971	0.00467856	0	0	2	0	0	0.2	0	Random Only
'COKECBESr'	1	1	1	1	0.99971	0.00467856	0	0	2	0	0	0.2	0	Random Only
'COQ3m'	1	1	1	1	0.99971	0.00467856	0	0	2	0	0	0.2	0	Random Only
'COQ5m'	1	1	1	1	0.99971	0.00467856	0	0	2	0	0	0.2	0	Random Only
'COQ6m'	1	1	1	1	0.99971	0.00467856	0	0	2	0	0	0.2	0	Random Only
'COQ7m'	1	1	1	1	0.99971	0.00467856	0	0	2	0	0	0.2	0	Random Only
'CORE2GTg'	0.992843	0.0594496	1	1	0.99971	0.00467856	3	0	2	1.43541	0	0.2	0	Random Only
'CORE6GTg'	1	1	1	1	0.99971	0.00467856	0	0	2	0	0	0.2	0	Random Only
'COUCOAFm'	1	1	1	1	0.99971	0.00467856	0	0	2	0	0	0.2	0	Random Only
'COUMARINte'	1	1	1	1	0.99971	0.00467856	0	0	2	0	0	0.2	0	Random Only
'COt'	1	1	1	1	0.99971	0.00467856	0	0	2	0	0	0.2	0	Random Only
'CPCTDTX'	1	1	1	1	0.99971	0.00467856	0	0	2	0	0	0.2	0	Random Only
'CPPPGO'	1	1	1	1	0.99971	0.00467856	0	0	2	0	0	0.2	0	Random Only
'CREATt4(2)r'	0.964489	0.0644473	1	1	0.988126	0.0255091	28	0	107	13.3971	0	10.7	0	Random Only
'CREATtmdiffir'	1	1	1	1	0.99971	0.00467856	0	0	2	0	0	0.2	0	Random Only
'CRMPte'	0.995733	0.0287599	1	1	0.999084	0.00708116	3	0	6	1.43541	0	0.6	0	Random Only
'CRNCAR3tp'	1	1	1	1	0.99971	0.00467856	0	0	2	0	0	0.2	0	Random Only
'CRNCARtp'	0.993461	0.0543163	1	1	0.99971	0.00467856	3	0	2	1.43541	0	0.2	0	Random Only
'CRNt'	1	1	1	1	0.99971	0.00467856	0	0	2	0	0	0.2	0	Random Only
'CRNtHa'	1	1	1	1	0.99971	0.00467856	0	0	2	0	0	0.2	0	Random Only
'CRNtim'	0.992823	0.0596155	1	1	0.99971	0.00467856	3	0	2	1.43541	0	0.2	0	Random Only
'CRNtuIR'	1	1	1	1	0.99971	0.00467856	0	0	2	0	0	0.2	0	Random Only
'CRNtuNa'	1	1	1	1	0.99971	0.00467856	0	0	2	0	0	0.2	0	Random Only
'CRNtx'	1	1	1	1	0.99971	0.00467856	0	0	2	0	0	0.2	0	Random Only
'CRTSLt'	1	1	1	1	0.99971	0.00467856	0	0	2	0	0	0.2	0	Random Only
'CRTSLtm'	1	1	1	1	0.99971	0.00467856	0	0	2	0	0	0.2	0	Random Only
'CRTSLtr'	1	1	1	1	0.99971	0.00467856	0	0	2	0	0	0.2	0	Random Only
'CRTSTRNt'	1	1	1	1	0.99971	0.00467856	0	0	2	0	0	0.2	0	Random Only
'CRTSTRNtm'	1	1	1	1	0.99971	0.00467856	0	0	2	0	0	0.2	0	Random Only
'CRTSTRNtr'	1	1	1	1	0.99971	0.00467856	0	0	2	0	0	0.2	0	Random Only
'CRVNCtr'	1	1	1	1	0.99971	0.00467856	0	0	2	0	0	0.2	0	Random Only
'CSNAT'	1	1	1	1	0.99971	0.00467856	0	0	2	0	0	0.2	0	Random Only
'CSNAT2m'	1	1	1	1	0.99971	0.00467856	0	0	2	0	0	0.2	0	Random Only
'CSNAT2x'	1	1	1	1	0.99971	0.00467856	0	0	2	0	0	0.2	0	Random Only
'CSNAT3x'	1	1	1	1	0.99971	0.00467856	0	0	2	0	0	0.2	0	Random Only
'CSNATer'	1	1	1	1	0.99971	0.00467856	0	0	2	0	0	0.2	0	Random Only
'CSNATm'	0.992823	0.0596155	1	1	0.99971	0.00467856	3	0	2	1.43541	0	0.2	0	Random Only
'CSNATp'	0.993461	0.0543163	1	1	0.99971	0.00467856	3	0	2	1.43541	0	0.2	0	Random Only
'CSNATr'	0.992823	0.0596155	1	1	0.99971	0.00467856	3	0	2	1.43541	0	0.2	0	Random Only
'CSNt'	1	1	1	1	0.99971	0.00467856	0	0	2	0	0	0.2	0	Random Only
'CSPG_At'	1	1	1	1	0.99971	0.00467856	0	0	2	0	0	0.2	0	Random Only
'CSPG_Atly'	1	1	1	1	0.99971	0.00467856	0	0	2	0	0	0.2	0	Random Only
'CSPG_Bt'	1	1	1	1	0.99971	0.00467856	0	0	2	0	0	0.2	0	Random Only
'CSPG_Btly'	1	1	1	1	0.99971	0.00467856	0	0	2	0	0	0.2	0	Random Only
'CSPG_Ct'	1	1	1	1	0.99971	0.00467856	0	0	2	0	0	0.2	0	Random Only
'CSPG_Ctly'	1	1	1	1	0.99971	0.00467856	0	0	2	0	0	0.2	0	Random Only
'CSPG_Dt'	1	1	1	1	0.99971	0.00467856	0	0	2	0	0	0.2	0	Random Only
'CSPG_Dtly'	1	1	1	1	0.99971	0.00467856	0	0	2	0	0	0.2	0	Random Only
'CSPG_Et'	1	1	1	1	0.99971	0.00467856	0	0	2	0	0	0.2	0	Random Only
'CSPG_Etly'	1	1	1	1	0.99971	0.00467856	0	0	2	0	0	0.2	0	Random Only
'CSm'	0.992823	0.0596155	1	1	0.99971	0.00467856	3	0	2	1.43541	0	0.2	0	Random Only
'CTPS1'	0.614	0.0215385	0.612273	0.00347964	0.652902	0.122931	209	6000	985	100	100	98.5	1	Both
'CTPS2'	1	1	1	1	0.99971	0.00467856	0	0	2	0	0	0.2	0	Random Only
'CTPtn'	0.992842	0.0594542	1	1	0.99971	0.00467856	3	0	2	1.43541	0	0.2	0	Random Only
'CYANSTm'	1	1	1	1	0.99971	0.00467856	0	0	2	0	0	0.2	0	Random Only
'CYANt'	1	1	1	1	0.99971	0.00467856	0	0	2	0	0	0.2	0	Random Only
'CYANtm'	1	1	1	1	0.99971	0.00467856	0	0	2	0	0	0.2	0	Random Only
'CYOOm2'	0.992814	0.0596145	1	1	0.99971	0.00467856	3	0	2	1.43541	0	0.2	0	Random Only
'CYOOm3'	1	1	1	1	0.99971	0.00467856	0	0	2	0	0	0.2	0	Random Only
'CYOR-u10m'	0.921323	0.146362	1	1	0.99971	0.00467856	48	0	2	22.9665	0	0.2	0	Random Only
'CYSALANaEx'	1	1	1	1	0.99971	0.00467856	0	0	2	0	0	0.2	0	Random Only
'CYSAMO'	0.922322	0.0655887	0.92079	0.00333605	0.867999	0.0330493	172	6000	974	82.2967	100	97.4	0	Both
'CYSASNNaEx'	1	1	1	1	0.99971	0.00467856	0	0	2	0	0	0.2	0	Random Only
'CYSGLNNaEx'	1	1	1	1	0.99971	0.00467856	0	0	2	0	0	0.2	0	Random Only
'CYSGLUexR'	1	1	1	1	0.99971	0.00467856	0	0	2	0	0	0.2	0	Random Only
'CYSGLYex'	1	1	1	1	0.99971	0.00467856	0	0	2	0	0	0.2	0	Random Only
'CYSGLYexR'	1	1	1	1	0.99971	0.00467856	0	0	2	0	0	0.2	0	Random Only
'CYSSERNaEx'	1	1	1	1	0.99971	0.00467856	0	0	2	0	0	0.2	0	Random Only
'CYSTA'	0.920796	0.0644906	0.92079	0.00333605	0.867926	0.0328443	174	6000	975	83.2536	100	97.5	0	Both
'CYSTAm'	1	1	1	1	0.99971	0.00467856	0	0	2	0	0	0.2	0	Random Only
'CYSTGL'	0.84661	0.0572633	0.846646	0.00332454	0.829724	0.0347499	203	6000	996	97.1292	100	99.6	1	Both
'CYSTGLUex'	1	1	1	1	0.99971	0.00467856	0	0	2	0	0	0.2	0	Random Only
'CYSTHRNaEx'	1	1	1	1	0.99971	0.00467856	0	0	2	0	0	0.2	0	Random Only
'CYSTS'	0.84661	0.0572633	0.846646	0.00332454	0.829724	0.0347499	203	6000	996	97.1292	100	99.6	1	Both
'CYSTSERex'	1	1	1	1	0.99971	0.00467856	0	0	2	0	0	0.2	0	Random Only
'CYSt4'	1	1	1	1	0.99971	0.00467856	0	0	2	0	0	0.2	0	Random Only
'CYStec'	1	1	1	1	0.99971	0.00467856	0	0	2	0	0	0.2	0	Random Only
'CYTD'	0.992823	0.0596155	1	1	0.99971	0.00467856	3	0	2	1.43541	0	0.2	0	Random Only
'CYTDK1'	0.992823	0.0596155	1	1	0.99971	0.00467856	3	0	2	1.43541	0	0.2	0	Random Only
'CYTDK2m'	0.992703	0.0590672	1	1	0.999681	0.0047665	3	0	2	1.43541	0	0.2	0	Random Only
'CYTDn'	0.992823	0.0596155	1	1	0.99971	0.00467856	3	0	2	1.43541	0	0.2	0	Random Only
'CYTDt'	1	1	1	1	0.99971	0.00467856	0	0	2	0	0	0.2	0	Random Only
'CYTDt4'	1	1	1	1	0.99971	0.00467856	0	0	2	0	0	0.2	0	Random Only
'CYTDt5'	1	1	1	1	0.99971	0.00467856	0	0	2	0	0	0.2	0	Random Only
'CYTDtl'	1	1	1	1	0.99971	0.00467856	0	0	2	0	0	0.2	0	Random Only
'CYTDtm'	0.992703	0.0590672	1	1	0.999681	0.0047665	3	0	2	1.43541	0	0.2	0	Random Only
'CYTDtn'	0.992823	0.0596155	1	1	0.99971	0.00467856	3	0	2	1.43541	0	0.2	0	Random Only
'CYTK1'	1	1	1	1	0.99971	0.00467856	0	0	2	0	0	0.2	0	Random Only
'CYTK10'	1	1	1	1	0.99971	0.00467856	0	0	2	0	0	0.2	0	Random Only
'CYTK10n'	1	1	1	1	0.99971	0.00467856	0	0	2	0	0	0.2	0	Random Only
'CYTK11'	1	1	1	1	0.99971	0.00467856	0	0	2	0	0	0.2	0	Random Only
'CYTK11n'	1	1	1	1	0.99971	0.00467856	0	0	2	0	0	0.2	0	Random Only
'CYTK12'	1	1	1	1	0.99971	0.00467856	0	0	2	0	0	0.2	0	Random Only
'CYTK12n'	1	1	1	1	0.99971	0.00467856	0	0	2	0	0	0.2	0	Random Only
'CYTK13'	1	1	1	1	0.99971	0.00467856	0	0	2	0	0	0.2	0	Random Only
'CYTK13n'	1	1	1	1	0.99971	0.00467856	0	0	2	0	0	0.2	0	Random Only
'CYTK14'	1	1	1	1	0.99971	0.00467856	0	0	2	0	0	0.2	0	Random Only
'CYTK14n'	1	1	1	1	0.99971	0.00467856	0	0	2	0	0	0.2	0	Random Only
'CYTK1m'	0.992703	0.0590672	1	1	0.999681	0.0047665	3	0	2	1.43541	0	0.2	0	Random Only
'CYTK1n'	1	1	1	1	0.99971	0.00467856	0	0	2	0	0	0.2	0	Random Only
'CYTK2'	1	1	1	1	0.99971	0.00467856	0	0	2	0	0	0.2	0	Random Only
'CYTK2n'	1	1	1	1	0.99971	0.00467856	0	0	2	0	0	0.2	0	Random Only
'CYTK3'	1	1	1	1	0.99971	0.00467856	0	0	2	0	0	0.2	0	Random Only
'CYTK3n'	1	1	1	1	0.99971	0.00467856	0	0	2	0	0	0.2	0	Random Only
'CYTK4'	1	1	1	1	0.99971	0.00467856	0	0	2	0	0	0.2	0	Random Only
'CYTK4n'	1	1	1	1	0.99971	0.00467856	0	0	2	0	0	0.2	0	Random Only
'CYTK5'	1	1	1	1	0.99971	0.00467856	0	0	2	0	0	0.2	0	Random Only
'CYTK5n'	1	1	1	1	0.99971	0.00467856	0	0	2	0	0	0.2	0	Random Only
'CYTK6'	1	1	1	1	0.99971	0.00467856	0	0	2	0	0	0.2	0	Random Only
'CYTK6n'	1	1	1	1	0.99971	0.00467856	0	0	2	0	0	0.2	0	Random Only
'CYTK7'	1	1	1	1	0.99971	0.00467856	0	0	2	0	0	0.2	0	Random Only
'CYTK7n'	1	1	1	1	0.99971	0.00467856	0	0	2	0	0	0.2	0	Random Only
'CYTK8'	1	1	1	1	0.99971	0.00467856	0	0	2	0	0	0.2	0	Random Only
'CYTK8n'	1	1	1	1	0.99971	0.00467856	0	0	2	0	0	0.2	0	Random Only
'CYTK9'	1	1	1	1	0.99971	0.00467856	0	0	2	0	0	0.2	0	Random Only
'CYTK9n'	1	1	1	1	0.99971	0.00467856	0	0	2	0	0	0.2	0	Random Only
'CytOxe-'	0.992823	0.0596155	1	1	0.99971	0.00467856	3	0	2	1.43541	0	0.2	0	Random Only
'D-LACt2'	0.99347	0.05424	1	1	0.99971	0.00467856	3	0	2	1.43541	0	0.2	0	Random Only
'D-LACtm'	1	1	1	1	0.99971	0.00467856	0	0	2	0	0	0.2	0	Random Only
'DADA'	0.992828	0.0595777	1	1	0.99971	0.00467856	3	0	2	1.43541	0	0.2	0	Random Only
'DADAe'	0.992828	0.0595777	1	1	0.99971	0.00467856	3	0	2	1.43541	0	0.2	0	Random Only
'DADNK'	0.992821	0.0596153	1	1	0.99971	0.00467856	3	0	2	1.43541	0	0.2	0	Random Only
'DADNt4'	0.992828	0.0595777	1	1	0.99971	0.00467856	3	0	2	1.43541	0	0.2	0	Random Only
'DAGK_hs'	0.992823	0.0596155	1	1	0.99971	0.00467856	3	0	2	1.43541	0	0.2	0	Random Only
'DAGKn_hs'	1	1	1	1	0.99971	0.00467856	0	0	2	0	0	0.2	0	Random Only
'DAG_HSter'	1	1	1	1	0.99971	0.00467856	0	0	2	0	0	0.2	0	Random Only
'DAGt'	1	1	1	1	0.99971	0.00467856	0	0	2	0	0	0.2	0	Random Only
'DALAOXx'	0.985508	0.0636613	1	1	0.99971	0.00467856	14	0	2	6.69856	0	0.2	0	Random Only
'DALAt2r'	1	1	1	1	0.99971	0.00467856	0	0	2	0	0	0.2	0	Random Only
'DALAt2rL'	1	1	1	1	0.99971	0.00467856	0	0	2	0	0	0.2	0	Random Only
'DALAxt'	0.985508	0.0636613	1	1	0.99971	0.00467856	14	0	2	6.69856	0	0.2	0	Random Only
'DASCBH'	1	1	1	1	0.99971	0.00467856	0	0	2	0	0	0.2	0	Random Only
'DASCBR'	0.992823	0.0596155	1	1	0.99971	0.00467856	3	0	2	1.43541	0	0.2	0	Random Only
'DASPO1p'	1	1	1	1	0.99971	0.00467856	0	0	2	0	0	0.2	0	Random Only
'DATPtn'	0.966319	0.0661224	1	1	0.989983	0.0241119	29	0	84	13.8756	0	8.4	0	Random Only
'DCK1n'	1	1	1	1	0.99971	0.00467856	0	0	2	0	0	0.2	0	Random Only
'DCK2n'	1	1	1	1	0.99971	0.00467856	0	0	2	0	0	0.2	0	Random Only
'DCMPDA'	0.992807	0.0596139	1	1	0.99971	0.00467856	3	0	2	1.43541	0	0.2	0	Random Only
'DCSPTN1COAtx'	1	1	1	1	0.99971	0.00467856	0	0	2	0	0	0.2	0	Random Only
'DCSPTN1CPT1'	1	1	1	1	0.99971	0.00467856	0	0	2	0	0	0.2	0	Random Only
'DCSPTN1CPT2'	1	1	1	1	0.99971	0.00467856	0	0	2	0	0	0.2	0	Random Only
'DCSPTN1CRNt'	1	1	1	1	0.99971	0.00467856	0	0	2	0	0	0.2	0	Random Only
'DCSPTN1t'	1	1	1	1	0.99971	0.00467856	0	0	2	0	0	0.2	0	Random Only
'DCTPtn'	0.975534	0.0686228	1	1	0.993831	0.0185368	28	0	45	13.3971	0	4.5	0	Random Only
'DCYTD'	0.992821	0.0596153	1	1	0.99971	0.00467856	3	0	2	1.43541	0	0.2	0	Random Only
'DCYTt'	0.957008	0.0644918	1	1	0.984942	0.0296382	29	0	130	13.8756	0	13	0	Random Only
'DEBRISOQUINEt'	1	1	1	1	0.99971	0.00467856	0	0	2	0	0	0.2	0	Random Only
'DEDOLP1_L'	1	1	1	1	0.99971	0.00467856	0	0	2	0	0	0.2	0	Random Only
'DEDOLP1_U'	1	1	1	1	0.99971	0.00467856	0	0	2	0	0	0.2	0	Random Only
'DEDOLP2_L'	1	1	1	1	0.99971	0.00467856	0	0	2	0	0	0.2	0	Random Only
'DEDOLP2_U'	1	1	1	1	0.99971	0.00467856	0	0	2	0	0	0.2	0	Random Only
'DEDOLR_L'	1	1	1	1	0.99971	0.00467856	0	0	2	0	0	0.2	0	Random Only
'DEDOLR_U'	1	1	1	1	0.99971	0.00467856	0	0	2	0	0	0.2	0	Random Only
'DESAT16_2'	1	1	1	1	0.99971	0.00467856	0	0	2	0	0	0.2	0	Random Only
'DESAT18_10'	1	1	1	1	0.99971	0.00467856	0	0	2	0	0	0.2	0	Random Only
'DESAT18_3'	0.994204	0.0483751	1	1	0.99971	0.00467856	3	0	2	1.43541	0	0.2	0	Random Only
'DESAT18_4'	0.994431	0.0473915	1	1	0.99971	0.00467856	3	0	2	1.43541	0	0.2	0	Random Only
'DESAT18_5'	0.994429	0.0473912	1	1	0.99971	0.00467856	3	0	2	1.43541	0	0.2	0	Random Only
'DESAT18_6'	0.997355	0.0225555	1	1	0.99971	0.00467856	3	0	2	1.43541	0	0.2	0	Random Only
'DESAT18_7'	0.997105	0.0250083	1	1	0.99971	0.00467856	3	0	2	1.43541	0	0.2	0	Random Only
'DESAT18_8'	0.997105	0.0250083	1	1	0.99971	0.00467856	3	0	2	1.43541	0	0.2	0	Random Only
'DESAT18_9'	1	1	1	1	0.99971	0.00467856	0	0	2	0	0	0.2	0	Random Only
'DESAT20_1'	1	1	1	1	0.99971	0.00467856	0	0	2	0	0	0.2	0	Random Only
'DESAT20_2'	1	1	1	1	0.99971	0.00467856	0	0	2	0	0	0.2	0	Random Only
'DESAT22_1p'	1	1	1	1	0.99971	0.00467856	0	0	2	0	0	0.2	0	Random Only
'DESAT22_2p'	1	1	1	1	0.99971	0.00467856	0	0	2	0	0	0.2	0	Random Only
'DESAT24_1'	1	1	1	1	0.99971	0.00467856	0	0	2	0	0	0.2	0	Random Only
'DGAT'	1	1	1	1	0.99971	0.00467856	0	0	2	0	0	0.2	0	Random Only
'DGCHOLte'	1	1	1	1	0.99971	0.00467856	0	0	2	0	0	0.2	0	Random Only
'DGK1'	0.993053	0.0575941	1	1	0.99971	0.00467856	3	0	2	1.43541	0	0.2	0	Random Only
'DGK2m'	0.989028	0.0566172	1	1	0.999102	0.0070068	10	0	6	4.78469	0	0.6	0	Random Only
'DGNSKm'	0.989028	0.0566172	1	1	0.999102	0.0070068	10	0	6	4.78469	0	0.6	0	Random Only
'DGSNt'	0.955809	0.0643162	1	1	0.984347	0.0301926	29	0	134	13.8756	0	13.4	0	Random Only
'DGSNtm'	0.989028	0.0566172	1	1	0.999102	0.0070068	10	0	6	4.78469	0	0.6	0	Random Only
'DGTPtn'	0.956481	0.0644319	1	1	0.984641	0.0299201	29	0	132	13.8756	0	13.2	0	Random Only
'DGULND'	0.993102	0.0572998	1	1	0.99971	0.00467856	3	0	2	1.43541	0	0.2	0	Random Only
'DHAAt1r'	1	1	1	1	0.99971	0.00467856	0	0	2	0	0	0.2	0	Random Only
'DHAPA'	1	1	1	1	0.99971	0.00467856	0	0	2	0	0	0.2	0	Random Only
'DHAPAx'	1	1	1	1	0.99971	0.00467856	0	0	2	0	0	0.2	0	Random Only
'DHCHOLESTANATEtm'	1	1	1	1	0.99971	0.00467856	0	0	2	0	0	0.2	0	Random Only
'DHCR241r'	0.992978	0.0574669	1	1	0.99971	0.00467856	3	0	2	1.43541	0	0.2	0	Random Only
'DHCR242r'	0.992978	0.0574669	1	1	0.99971	0.00467856	3	0	2	1.43541	0	0.2	0	Random Only
'DHCR243r'	0.992974	0.0574869	1	1	0.99971	0.00467856	3	0	2	1.43541	0	0.2	0	Random Only
'DHCR71r'	0.992974	0.0574869	1	1	0.99971	0.00467856	3	0	2	1.43541	0	0.2	0	Random Only
'DHCR72r'	0.992974	0.0574869	1	1	0.99971	0.00467856	3	0	2	1.43541	0	0.2	0	Random Only
'DHCRD1'	0.987163	0.0597673	1	1	0.999072	0.00713289	14	0	6	6.69856	0	0.6	0	Random Only
'DHCRD2'	0.992746	0.0591073	1	1	0.999701	0.00468732	3	0	2	1.43541	0	0.2	0	Random Only
'DHDPBMTm'	1	1	1	1	0.99971	0.00467856	0	0	2	0	0	0.2	0	Random Only
'DHEASt'	1	1	1	1	0.99971	0.00467856	0	0	2	0	0	0.2	0	Random Only
'DHEAStr'	1	1	1	1	0.99971	0.00467856	0	0	2	0	0	0.2	0	Random Only
'DHEAtr'	1	1	1	1	0.99971	0.00467856	0	0	2	0	0	0.2	0	Random Only
'DHFR'	0.967139	0.0667485	1	1	0.990656	0.0232249	29	0	80	13.8756	0	8	0	Random Only
'DHFtl'	0.992823	0.0596155	1	1	0.99971	0.00467856	3	0	2	1.43541	0	0.2	0	Random Only
'DHFtm'	0.992823	0.0596155	1	1	0.99971	0.00467856	3	0	2	1.43541	0	0.2	0	Random Only
'DHORD9'	0.664385	0.0282508	0.668456	0.000748539	0.735323	0.0687987	209	6000	997	100	100	99.7	1	Both
'DHORTS'	0.664385	0.0282508	0.668456	0.000748539	0.735323	0.0687987	209	6000	997	100	100	99.7	1	Both
'DHPM1'	1	1	1	1	0.99971	0.00467856	0	0	2	0	0	0.2	0	Random Only
'DHPR'	0.988277	0.0617278	1	1	0.931727	0.0475927	14	0	622	6.69856	0	62.2	0	Random Only
'DHPR2'	0.988277	0.0617278	1	1	0.931727	0.0475927	14	0	622	6.69856	0	62.2	0	Random Only
'DIDPtn'	1	1	1	1	0.99971	0.00467856	0	0	2	0	0	0.2	0	Random Only
'DIGALSGALSIDEte'	1	1	1	1	0.99971	0.00467856	0	0	2	0	0	0.2	0	Random Only
'DIGALSIDEtl'	1	1	1	1	0.99971	0.00467856	0	0	2	0	0	0.2	0	Random Only
'DINt'	0.961514	0.0651513	1	1	0.987611	0.0269622	29	0	107	13.8756	0	10.7	0	Random Only
'DITPtn'	1	1	1	1	0.99971	0.00467856	0	0	2	0	0	0.2	0	Random Only
'DLNLCGCPT1'	1	1	1	1	0.99971	0.00467856	0	0	2	0	0	0.2	0	Random Only
'DLNLCGCPT2'	1	1	1	1	0.99971	0.00467856	0	0	2	0	0	0.2	0	Random Only
'DLNLCGCRNt'	1	1	1	1	0.99971	0.00467856	0	0	2	0	0	0.2	0	Random Only
'DLNLCGt'	1	1	1	1	0.99971	0.00467856	0	0	2	0	0	0.2	0	Random Only
'DMATT'	1	1	1	1	0.99971	0.00467856	0	0	2	0	0	0.2	0	Random Only
'DMATTx'	0.992978	0.0574669	1	1	0.99971	0.00467856	3	0	2	1.43541	0	0.2	0	Random Only
'DMHPTCRNCPT1'	1	1	1	1	0.99971	0.00467856	0	0	2	0	0	0.2	0	Random Only
'DMHPTCRNCPT2'	1	1	1	1	0.99971	0.00467856	0	0	2	0	0	0.2	0	Random Only
'DMHPTCRNt'	1	1	1	1	0.99971	0.00467856	0	0	2	0	0	0.2	0	Random Only
'DMHPTCRNte'	1	1	1	1	0.99971	0.00467856	0	0	2	0	0	0.2	0	Random Only
'DMNONCRNCPT2'	1	1	1	1	0.99971	0.00467856	0	0	2	0	0	0.2	0	Random Only
'DMNONCRNt'	1	1	1	1	0.99971	0.00467856	0	0	2	0	0	0.2	0	Random Only
'DM_13-cis-oretn(n)'	1	1	1	1	0.99971	0.00467856	0	0	2	0	0	0.2	0	Random Only
'DM_13-cis-retn(n)'	1	1	1	1	0.99971	0.00467856	0	0	2	0	0	0.2	0	Random Only
'DM_Asn-X-Ser/Thr(ly)'	1	1	1	1	0.99971	0.00467856	0	0	2	0	0	0.2	0	Random Only
'DM_Ser-Gly/Ala-X-Gly(ly)'	1	1	1	1	0.99971	0.00467856	0	0	2	0	0	0.2	0	Random Only
'DM_Ser/Thr(ly)'	1	1	1	1	0.99971	0.00467856	0	0	2	0	0	0.2	0	Random Only
'DM_T_antigen(g)'	1	1	1	1	0.99971	0.00467856	0	0	2	0	0	0.2	0	Random Only
'DM_atp(c)'	0.992823	0.0596155	1	1	0.99971	0.00467856	3	0	2	1.43541	0	0.2	0	Random Only
'DM_avite1(c)'	1	1	1	1	0.99971	0.00467856	0	0	2	0	0	0.2	0	Random Only
'DM_avite2(c)'	1	1	1	1	0.99971	0.00467856	0	0	2	0	0	0.2	0	Random Only
'DM_bvite(c)'	1	1	1	1	0.99971	0.00467856	0	0	2	0	0	0.2	0	Random Only
'DM_datp(m)'	0.972799	0.0678168	1	1	0.992327	0.0208478	29	0	60	13.8756	0	6	0	Random Only
'DM_datp(n)'	0.966319	0.0661224	1	1	0.989983	0.0241119	29	0	84	13.8756	0	8.4	0	Random Only
'DM_dctp(m)'	0.976992	0.0686374	1	1	0.996117	0.0145268	27	0	22	12.9187	0	2.2	0	Random Only
'DM_dctp(n)'	0.975534	0.0686228	1	1	0.993831	0.0185368	28	0	45	13.3971	0	4.5	0	Random Only
'DM_dgtp(m)'	0.961155	0.0650748	1	1	0.987498	0.0270863	29	0	110	13.8756	0	11	0	Random Only
'DM_dgtp(n)'	0.956481	0.0644319	1	1	0.984641	0.0299201	29	0	132	13.8756	0	13.2	0	Random Only
'DM_dsT_antigen(g)'	1	1	1	1	0.99971	0.00467856	0	0	2	0	0	0.2	0	Random Only
'DM_dttp(m)'	0.989041	0.0566155	1	1	0.999122	0.00692504	10	0	6	4.78469	0	0.6	0	Random Only
'DM_dttp(n)'	0.98388	0.0650309	1	1	0.99892	0.00779117	16	0	6	7.6555	0	0.6	0	Random Only
'DM_ethamp(r)'	0.987216	0.0597409	1	1	0.999079	0.00710217	14	0	6	6.69856	0	0.6	0	Random Only
'DM_gpi_sig(er)'	1	1	1	1	0.99971	0.00467856	0	0	2	0	0	0.2	0	Random Only
'DM_kdn(c)'	0.992985	0.0582714	1	1	0.99971	0.00467856	3	0	2	1.43541	0	0.2	0	Random Only
'DM_m(em)3gacpail_prot_hs(r)'	1	1	1	1	0.99971	0.00467856	0	0	2	0	0	0.2	0	Random Only
'DM_mem2emgacpail_prot_hs(r)'	1	1	1	1	0.99971	0.00467856	0	0	2	0	0	0.2	0	Random Only
'DM_n5m2masn(g)'	1	1	1	1	0.99971	0.00467856	0	0	2	0	0	0.2	0	Random Only
'DM_oretn(n)'	1	1	1	1	0.99971	0.00467856	0	0	2	0	0	0.2	0	Random Only
'DM_sTn_antigen(g)'	1	1	1	1	0.99971	0.00467856	0	0	2	0	0	0.2	0	Random Only
'DM_sprm(c)'	1	1	1	1	0.99971	0.00467856	0	0	2	0	0	0.2	0	Random Only
'DM_yvite(c)'	1	1	1	1	0.99971	0.00467856	0	0	2	0	0	0.2	0	Random Only
'DNADDP'	0.992823	0.0596155	1	1	0.99971	0.00467856	3	0	2	1.43541	0	0.2	0	Random Only
'DNADtn'	0.992766	0.0596115	1	1	0.99971	0.00467856	3	0	2	1.43541	0	0.2	0	Random Only
'DNAMTSEn'	1	1	1	1	0.99971	0.00467856	0	0	2	0	0	0.2	0	Random Only
'DNAMTn'	1	1	1	1	0.99971	0.00467856	0	0	2	0	0	0.2	0	Random Only
'DNDPt10m'	1	1	1	1	0.99971	0.00467856	0	0	2	0	0	0.2	0	Random Only
'DNDPt11m'	1	1	1	1	0.99971	0.00467856	0	0	2	0	0	0.2	0	Random Only
'DNDPt12m'	0.988969	0.056646	1	1	0.999084	0.00707999	10	0	6	4.78469	0	0.6	0	Random Only
'DNDPt13m'	0.988969	0.056646	1	1	0.999084	0.00707999	10	0	6	4.78469	0	0.6	0	Random Only
'DNDPt14m'	1	1	1	1	0.99971	0.00467856	0	0	2	0	0	0.2	0	Random Only
'DNDPt15m'	1	1	1	1	0.99971	0.00467856	0	0	2	0	0	0.2	0	Random Only
'DNDPt16m'	1	1	1	1	0.99971	0.00467856	0	0	2	0	0	0.2	0	Random Only
'DNDPt17m'	1	1	1	1	0.99971	0.00467856	0	0	2	0	0	0.2	0	Random Only
'DNDPt18m'	0.988969	0.056646	1	1	0.999084	0.00707999	10	0	6	4.78469	0	0.6	0	Random Only
'DNDPt19m'	0.988969	0.056646	1	1	0.999084	0.00707999	10	0	6	4.78469	0	0.6	0	Random Only
'DNDPt1m'	0.988969	0.056646	1	1	0.999084	0.00707999	10	0	6	4.78469	0	0.6	0	Random Only
'DNDPt20m'	0.988969	0.056646	1	1	0.999084	0.00707999	10	0	6	4.78469	0	0.6	0	Random Only
'DNDPt21m'	0.988969	0.056646	1	1	0.999084	0.00707999	10	0	6	4.78469	0	0.6	0	Random Only
'DNDPt22m'	1	1	1	1	0.99971	0.00467856	0	0	2	0	0	0.2	0	Random Only
'DNDPt23m'	1	1	1	1	0.99971	0.00467856	0	0	2	0	0	0.2	0	Random Only
'DNDPt24m'	1	1	1	1	0.99971	0.00467856	0	0	2	0	0	0.2	0	Random Only
'DNDPt25m'	1	1	1	1	0.99971	0.00467856	0	0	2	0	0	0.2	0	Random Only
'DNDPt26m'	1	1	1	1	0.99971	0.00467856	0	0	2	0	0	0.2	0	Random Only
'DNDPt27m'	1	1	1	1	0.99971	0.00467856	0	0	2	0	0	0.2	0	Random Only
'DNDPt28m'	1	1	1	1	0.99971	0.00467856	0	0	2	0	0	0.2	0	Random Only
'DNDPt29m'	1	1	1	1	0.99971	0.00467856	0	0	2	0	0	0.2	0	Random Only
'DNDPt2m'	0.988969	0.056646	1	1	0.999084	0.00707999	10	0	6	4.78469	0	0.6	0	Random Only
'DNDPt30m'	0.988969	0.056646	1	1	0.999084	0.00707999	10	0	6	4.78469	0	0.6	0	Random Only
'DNDPt31m'	0.988969	0.056646	1	1	0.999084	0.00707999	10	0	6	4.78469	0	0.6	0	Random Only
'DNDPt32m'	0.988969	0.056646	1	1	0.999084	0.00707999	10	0	6	4.78469	0	0.6	0	Random Only
'DNDPt33m'	1	1	1	1	0.99971	0.00467856	0	0	2	0	0	0.2	0	Random Only
'DNDPt34m'	1	1	1	1	0.99971	0.00467856	0	0	2	0	0	0.2	0	Random Only
'DNDPt35m'	1	1	1	1	0.99971	0.00467856	0	0	2	0	0	0.2	0	Random Only
'DNDPt36m'	1	1	1	1	0.99971	0.00467856	0	0	2	0	0	0.2	0	Random Only
'DNDPt37m'	1	1	1	1	0.99971	0.00467856	0	0	2	0	0	0.2	0	Random Only
'DNDPt38m'	1	1	1	1	0.99971	0.00467856	0	0	2	0	0	0.2	0	Random Only
'DNDPt39m'	1	1	1	1	0.99971	0.00467856	0	0	2	0	0	0.2	0	Random Only
'DNDPt3m'	1	1	1	1	0.99971	0.00467856	0	0	2	0	0	0.2	0	Random Only
'DNDPt40m'	1	1	1	1	0.99971	0.00467856	0	0	2	0	0	0.2	0	Random Only
'DNDPt41m'	1	1	1	1	0.99971	0.00467856	0	0	2	0	0	0.2	0	Random Only
'DNDPt42m'	0.988969	0.056646	1	1	0.999084	0.00707999	10	0	6	4.78469	0	0.6	0	Random Only
'DNDPt43m'	0.988969	0.056646	1	1	0.999084	0.00707999	10	0	6	4.78469	0	0.6	0	Random Only
'DNDPt44m'	0.988969	0.056646	1	1	0.999084	0.00707999	10	0	6	4.78469	0	0.6	0	Random Only
'DNDPt45m'	0.988969	0.056646	1	1	0.999084	0.00707999	10	0	6	4.78469	0	0.6	0	Random Only
'DNDPt46m'	1	1	1	1	0.99971	0.00467856	0	0	2	0	0	0.2	0	Random Only
'DNDPt47m'	1	1	1	1	0.99971	0.00467856	0	0	2	0	0	0.2	0	Random Only
'DNDPt48m'	1	1	1	1	0.99971	0.00467856	0	0	2	0	0	0.2	0	Random Only
'DNDPt49m'	1	1	1	1	0.99971	0.00467856	0	0	2	0	0	0.2	0	Random Only
'DNDPt4m'	1	1	1	1	0.99971	0.00467856	0	0	2	0	0	0.2	0	Random Only
'DNDPt50m'	1	1	1	1	0.99971	0.00467856	0	0	2	0	0	0.2	0	Random Only
'DNDPt51m'	1	1	1	1	0.99971	0.00467856	0	0	2	0	0	0.2	0	Random Only
'DNDPt52m'	1	1	1	1	0.99971	0.00467856	0	0	2	0	0	0.2	0	Random Only
'DNDPt53m'	1	1	1	1	0.99971	0.00467856	0	0	2	0	0	0.2	0	Random Only
'DNDPt54m'	1	1	1	1	0.99971	0.00467856	0	0	2	0	0	0.2	0	Random Only
'DNDPt55m'	0.988969	0.056646	1	1	0.999084	0.00707999	10	0	6	4.78469	0	0.6	0	Random Only
'DNDPt56m'	0.988969	0.056646	1	1	0.999084	0.00707999	10	0	6	4.78469	0	0.6	0	Random Only
'DNDPt57m'	0.988969	0.056646	1	1	0.999084	0.00707999	10	0	6	4.78469	0	0.6	0	Random Only
'DNDPt58m'	0.988969	0.056646	1	1	0.999084	0.00707999	10	0	6	4.78469	0	0.6	0	Random Only
'DNDPt59m'	1	1	1	1	0.99971	0.00467856	0	0	2	0	0	0.2	0	Random Only
'DNDPt5m'	1	1	1	1	0.99971	0.00467856	0	0	2	0	0	0.2	0	Random Only
'DNDPt60m'	1	1	1	1	0.99971	0.00467856	0	0	2	0	0	0.2	0	Random Only
'DNDPt61m'	1	1	1	1	0.99971	0.00467856	0	0	2	0	0	0.2	0	Random Only
'DNDPt62m'	1	1	1	1	0.99971	0.00467856	0	0	2	0	0	0.2	0	Random Only
'DNDPt63m'	1	1	1	1	0.99971	0.00467856	0	0	2	0	0	0.2	0	Random Only
'DNDPt6m'	1	1	1	1	0.99971	0.00467856	0	0	2	0	0	0.2	0	Random Only
'DNDPt7m'	1	1	1	1	0.99971	0.00467856	0	0	2	0	0	0.2	0	Random Only
'DNDPt8m'	1	1	1	1	0.99971	0.00467856	0	0	2	0	0	0.2	0	Random Only
'DNDPt9m'	1	1	1	1	0.99971	0.00467856	0	0	2	0	0	0.2	0	Random Only
'DOGULND1'	1	1	1	1	0.99971	0.00467856	0	0	2	0	0	0.2	0	Random Only
'DOGULND2'	1	1	1	1	0.99971	0.00467856	0	0	2	0	0	0.2	0	Random Only
'DOGULNO1'	1	1	1	1	0.99971	0.00467856	0	0	2	0	0	0.2	0	Random Only
'DOGULNO2'	1	1	1	1	0.99971	0.00467856	0	0	2	0	0	0.2	0	Random Only
'DOLASNT_Ler'	0.992823	0.0596155	1	1	0.99971	0.00467856	3	0	2	1.43541	0	0.2	0	Random Only
'DOLASNT_Uer'	0.992823	0.0596155	1	1	0.99971	0.00467856	3	0	2	1.43541	0	0.2	0	Random Only
'DOLDPP_Ler'	0.992823	0.0596155	1	1	0.99971	0.00467856	3	0	2	1.43541	0	0.2	0	Random Only
'DOLDPP_Uer'	0.992823	0.0596155	1	1	0.99971	0.00467856	3	0	2	1.43541	0	0.2	0	Random Only
'DOLGLCP_Lter'	0.992823	0.0596155	1	1	0.99971	0.00467856	3	0	2	1.43541	0	0.2	0	Random Only
'DOLGLCP_Uter'	0.992823	0.0596155	1	1	0.99971	0.00467856	3	0	2	1.43541	0	0.2	0	Random Only
'DOLGPP_Ler'	0.992823	0.0596155	1	1	0.99971	0.00467856	3	0	2	1.43541	0	0.2	0	Random Only
'DOLGPP_Uer'	0.992823	0.0596155	1	1	0.99971	0.00467856	3	0	2	1.43541	0	0.2	0	Random Only
'DOLICHOL_Lter'	0.992823	0.0596155	1	1	0.99971	0.00467856	3	0	2	1.43541	0	0.2	0	Random Only
'DOLICHOL_Uter'	0.992823	0.0596155	1	1	0.99971	0.00467856	3	0	2	1.43541	0	0.2	0	Random Only
'DOLK_L'	0.992823	0.0596155	1	1	0.99971	0.00467856	3	0	2	1.43541	0	0.2	0	Random Only
'DOLK_U'	0.992823	0.0596155	1	1	0.99971	0.00467856	3	0	2	1.43541	0	0.2	0	Random Only
'DOLMANP_Lter'	0.992823	0.0596155	1	1	0.99971	0.00467856	3	0	2	1.43541	0	0.2	0	Random Only
'DOLMANP_Uter'	0.992823	0.0596155	1	1	0.99971	0.00467856	3	0	2	1.43541	0	0.2	0	Random Only
'DOLPGT1_Ler'	0.992823	0.0596155	1	1	0.99971	0.00467856	3	0	2	1.43541	0	0.2	0	Random Only
'DOLPGT1_Uer'	0.992823	0.0596155	1	1	0.99971	0.00467856	3	0	2	1.43541	0	0.2	0	Random Only
'DOLPGT2_Ler'	0.992823	0.0596155	1	1	0.99971	0.00467856	3	0	2	1.43541	0	0.2	0	Random Only
'DOLPGT2_Uer'	0.992823	0.0596155	1	1	0.99971	0.00467856	3	0	2	1.43541	0	0.2	0	Random Only
'DOLPGT3_Ler'	0.992823	0.0596155	1	1	0.99971	0.00467856	3	0	2	1.43541	0	0.2	0	Random Only
'DOLPGT3_Uer'	0.992823	0.0596155	1	1	0.99971	0.00467856	3	0	2	1.43541	0	0.2	0	Random Only
'DOLPH_Ler'	0.992823	0.0596155	1	1	0.99971	0.00467856	3	0	2	1.43541	0	0.2	0	Random Only
'DOLPH_Uer'	0.992823	0.0596155	1	1	0.99971	0.00467856	3	0	2	1.43541	0	0.2	0	Random Only
'DOLPMT1_Ler'	0.992823	0.0596155	1	1	0.99971	0.00467856	3	0	2	1.43541	0	0.2	0	Random Only
'DOLPMT1_Uer'	0.992823	0.0596155	1	1	0.99971	0.00467856	3	0	2	1.43541	0	0.2	0	Random Only
'DOLPMT2_Ler'	0.992823	0.0596155	1	1	0.99971	0.00467856	3	0	2	1.43541	0	0.2	0	Random Only
'DOLPMT2_Uer'	0.992823	0.0596155	1	1	0.99971	0.00467856	3	0	2	1.43541	0	0.2	0	Random Only
'DOLPMT3_Ler'	0.992823	0.0596155	1	1	0.99971	0.00467856	3	0	2	1.43541	0	0.2	0	Random Only
'DOLPMT3_Uer'	0.992823	0.0596155	1	1	0.99971	0.00467856	3	0	2	1.43541	0	0.2	0	Random Only
'DOLPMT4_Ler'	0.992823	0.0596155	1	1	0.99971	0.00467856	3	0	2	1.43541	0	0.2	0	Random Only
'DOLPMT4_Uer'	0.992823	0.0596155	1	1	0.99971	0.00467856	3	0	2	1.43541	0	0.2	0	Random Only
'DOLPMT_L'	0.992823	0.0596155	1	1	0.99971	0.00467856	3	0	2	1.43541	0	0.2	0	Random Only
'DOLPMT_U'	0.992823	0.0596155	1	1	0.99971	0.00467856	3	0	2	1.43541	0	0.2	0	Random Only
'DOLP_Lter'	0.992823	0.0596155	1	1	0.99971	0.00467856	3	0	2	1.43541	0	0.2	0	Random Only
'DOLP_Uter'	0.992823	0.0596155	1	1	0.99971	0.00467856	3	0	2	1.43541	0	0.2	0	Random Only
'DOPABMO'	1	1	1	1	0.99971	0.00467856	0	0	2	0	0	0.2	0	Random Only
'DOPAMT'	1	1	1	1	0.99971	0.00467856	0	0	2	0	0	0.2	0	Random Only
'DOPASFt'	1	1	1	1	0.99971	0.00467856	0	0	2	0	0	0.2	0	Random Only
'DOPASULT'	1	1	1	1	0.99971	0.00467856	0	0	2	0	0	0.2	0	Random Only
'DOPAVESSEC'	0.992823	0.0596155	1	1	0.99971	0.00467856	3	0	2	1.43541	0	0.2	0	Random Only
'DOPAt4(2)r'	1	1	1	1	0.99971	0.00467856	0	0	2	0	0	0.2	0	Random Only
'DOPAtu'	1	1	1	1	0.99971	0.00467856	0	0	2	0	0	0.2	0	Random Only
'DPCOAK'	1	1	1	1	0.99971	0.00467856	0	0	2	0	0	0.2	0	Random Only
'DPCOAPP'	0.992823	0.0596155	1	1	0.99971	0.00467856	3	0	2	1.43541	0	0.2	0	Random Only
'DPCOAtl'	1	1	1	1	0.99971	0.00467856	0	0	2	0	0	0.2	0	Random Only
'DPHMBDCm'	1	1	1	1	0.99971	0.00467856	0	0	2	0	0	0.2	0	Random Only
'DPMVDx'	0.992978	0.0574669	1	1	0.99971	0.00467856	3	0	2	1.43541	0	0.2	0	Random Only
'DRIBt'	0.993066	0.0575955	1	1	0.99971	0.00467856	3	0	2	1.43541	0	0.2	0	Random Only
'DRPA'	1	1	1	1	0.99971	0.00467856	0	0	2	0	0	0.2	0	Random Only
'DSAT'	0.987163	0.0597673	1	1	0.999072	0.00713289	14	0	6	6.69856	0	0.6	0	Random Only
'DTDPtn'	1	1	1	1	0.99971	0.00467856	0	0	2	0	0	0.2	0	Random Only
'DTMPK'	0.98388	0.0650309	1	1	0.99892	0.00779117	16	0	6	7.6555	0	0.6	0	Random Only
'DTTPtn'	1	1	1	1	0.99971	0.00467856	0	0	2	0	0	0.2	0	Random Only
'DUDPtn'	1	1	1	1	0.99971	0.00467856	0	0	2	0	0	0.2	0	Random Only
'DUMPtn'	1	1	1	1	0.99971	0.00467856	0	0	2	0	0	0.2	0	Random Only
'DURAD'	1	1	1	1	0.99971	0.00467856	0	0	2	0	0	0.2	0	Random Only
'DURAD2'	1	1	1	1	0.99971	0.00467856	0	0	2	0	0	0.2	0	Random Only
'DURIK1'	0.992823	0.0596155	1	1	0.99971	0.00467856	3	0	2	1.43541	0	0.2	0	Random Only
'DURIK1m'	0.992823	0.0596155	1	1	0.99971	0.00467856	3	0	2	1.43541	0	0.2	0	Random Only
'DURIPP'	0.966494	0.066901	1	1	0.990604	0.0232946	29	0	81	13.8756	0	8.1	0	Random Only
'DURIt'	0.978449	0.0684447	1	1	0.997743	0.0111733	26	0	16	12.4402	0	1.6	0	Random Only
'DURItn'	1	1	1	1	0.99971	0.00467856	0	0	2	0	0	0.2	0	Random Only
'DUTPDPm'	0.992823	0.0596155	1	1	0.99971	0.00467856	3	0	2	1.43541	0	0.2	0	Random Only
'DUTPDPn'	1	1	1	1	0.99971	0.00467856	0	0	2	0	0	0.2	0	Random Only
'EAFLATOXINte'	1	1	1	1	0.99971	0.00467856	0	0	2	0	0	0.2	0	Random Only
'EBASTINEOHte'	1	1	1	1	0.99971	0.00467856	0	0	2	0	0	0.2	0	Random Only
'EBASTINEte'	1	1	1	1	0.99971	0.00467856	0	0	2	0	0	0.2	0	Random Only
'EBP1r'	0.992978	0.0574669	1	1	0.99971	0.00467856	3	0	2	1.43541	0	0.2	0	Random Only
'EBP2r'	0.992978	0.0574669	1	1	0.99971	0.00467856	3	0	2	1.43541	0	0.2	0	Random Only
'ECOAH12m'	0.960644	0.0677343	1	1	0.99437	0.0116995	34	0	2	16.2679	0	0.2	0	Random Only
'ECOAH1m'	1	1	1	1	0.99971	0.00467856	0	0	2	0	0	0.2	0	Random Only
'ECOAH1x'	1	1	1	1	0.99971	0.00467856	0	0	2	0	0	0.2	0	Random Only
'ECOAH9m'	1	1	1	1	0.99971	0.00467856	0	0	2	0	0	0.2	0	Random Only
'EGMESTr'	1	1	1	1	0.99971	0.00467856	0	0	2	0	0	0.2	0	Random Only
'EHGLAT'	1	1	1	1	0.99971	0.00467856	0	0	2	0	0	0.2	0	Random Only
'EHGLAT2m'	1	1	1	1	0.99971	0.00467856	0	0	2	0	0	0.2	0	Random Only
'EHGLATm'	1	1	1	1	0.99971	0.00467856	0	0	2	0	0	0.2	0	Random Only
'EICOSTETCPT1'	1	1	1	1	0.99971	0.00467856	0	0	2	0	0	0.2	0	Random Only
'EICOSTETCPT2'	1	1	1	1	0.99971	0.00467856	0	0	2	0	0	0.2	0	Random Only
'EICOSTETCRNt'	1	1	1	1	0.99971	0.00467856	0	0	2	0	0	0.2	0	Random Only
'EICOSTETt'	1	1	1	1	0.99971	0.00467856	0	0	2	0	0	0.2	0	Random Only
'ELAIDCPT1'	1	1	1	1	0.99971	0.00467856	0	0	2	0	0	0.2	0	Random Only
'ELAIDCPT2'	1	1	1	1	0.99971	0.00467856	0	0	2	0	0	0.2	0	Random Only
'ELAIDCRNt'	1	1	1	1	0.99971	0.00467856	0	0	2	0	0	0.2	0	Random Only
'ELAIDt'	0.996827	0.0265776	1	1	0.99971	0.00467856	3	0	2	1.43541	0	0.2	0	Random Only
'ENGASE'	1	1	1	1	0.99971	0.00467856	0	0	2	0	0	0.2	0	Random Only
'ENGASE2'	1	1	1	1	0.99971	0.00467856	0	0	2	0	0	0.2	0	Random Only
'ENGASE2ly'	0.992823	0.0596155	1	1	0.99971	0.00467856	3	0	2	1.43541	0	0.2	0	Random Only
'ENMAN1g'	1	1	1	1	0.99971	0.00467856	0	0	2	0	0	0.2	0	Random Only
'ENMAN2g'	1	1	1	1	0.99971	0.00467856	0	0	2	0	0	0.2	0	Random Only
'ENMAN3g'	1	1	1	1	0.99971	0.00467856	0	0	2	0	0	0.2	0	Random Only
'ENMAN4g'	1	1	1	1	0.99971	0.00467856	0	0	2	0	0	0.2	0	Random Only
'ENMAN5g'	1	1	1	1	0.99971	0.00467856	0	0	2	0	0	0.2	0	Random Only
'ENMAN6g'	1	1	1	1	0.99971	0.00467856	0	0	2	0	0	0.2	0	Random Only
'ENO'	0.991483	0.0599455	1	1	0.99971	0.00467856	5	0	2	2.39234	0	0.2	0	Random Only
'ESTRADIOLGLCt'	0.992823	0.0596155	1	1	0.99971	0.00467856	3	0	2	1.43541	0	0.2	0	Random Only
'ESTRADIOLGLCt2'	0.992823	0.0596155	1	1	0.99971	0.00467856	3	0	2	1.43541	0	0.2	0	Random Only
'ESTRADIOLGLCtr'	1	1	1	1	0.99971	0.00467856	0	0	2	0	0	0.2	0	Random Only
'ESTRADIOLt'	1	1	1	1	0.99971	0.00467856	0	0	2	0	0	0.2	0	Random Only
'ESTRADIOLtr'	1	1	1	1	0.99971	0.00467856	0	0	2	0	0	0.2	0	Random Only
'ESTRIOLGLCte'	1	1	1	1	0.99971	0.00467856	0	0	2	0	0	0.2	0	Random Only
'ESTRIOLGLCtr'	1	1	1	1	0.99971	0.00467856	0	0	2	0	0	0.2	0	Random Only
'ESTRONEGLCt'	1	1	1	1	0.99971	0.00467856	0	0	2	0	0	0.2	0	Random Only
'ESTRONEGLCtr'	1	1	1	1	0.99971	0.00467856	0	0	2	0	0	0.2	0	Random Only
'ESTRONESt'	1	1	1	1	0.99971	0.00467856	0	0	2	0	0	0.2	0	Random Only
'ESTRONESt2'	1	1	1	1	0.99971	0.00467856	0	0	2	0	0	0.2	0	Random Only
'ESTRONEtr'	1	1	1	1	0.99971	0.00467856	0	0	2	0	0	0.2	0	Random Only
'ESTSULT'	0.992823	0.0596155	1	1	0.99971	0.00467856	3	0	2	1.43541	0	0.2	0	Random Only
'ETF'	0.992773	0.0596101	1	1	0.998106	0.0114157	3	0	14	1.43541	0	1.4	0	Random Only
'ETFQO'	0.992773	0.0596101	1	1	0.998106	0.0114157	3	0	14	1.43541	0	1.4	0	Random Only
'ETHAK'	0.992818	0.0596149	1	1	0.99971	0.00467856	3	0	2	1.43541	0	0.2	0	Random Only
'ETHP'	0.992823	0.0596155	1	1	0.99971	0.00467856	3	0	2	1.43541	0	0.2	0	Random Only
'ETOHMO'	1	1	1	1	0.99971	0.00467856	0	0	2	0	0	0.2	0	Random Only
'ETOHt'	1	1	1	1	0.99971	0.00467856	0	0	2	0	0	0.2	0	Random Only
'ETOHtx'	1	1	1	1	0.99971	0.00467856	0	0	2	0	0	0.2	0	Random Only
'EX_10fthf(e)'	1	1	1	1	0.99971	0.00467856	0	0	2	0	0	0.2	0	Random Only
'EX_10fthf5glu(e)'	1	1	1	1	0.99971	0.00467856	0	0	2	0	0	0.2	0	Random Only
'EX_10fthf6glu(e)'	1	1	1	1	0.99971	0.00467856	0	0	2	0	0	0.2	0	Random Only
'EX_10fthf7glu(e)'	1	1	1	1	0.99971	0.00467856	0	0	2	0	0	0.2	0	Random Only
'EX_11-cis-retfa(e)'	1	1	1	1	0.99971	0.00467856	0	0	2	0	0	0.2	0	Random Only
'EX_13-cis-retnglc(e)'	1	1	1	1	0.99971	0.00467856	0	0	2	0	0	0.2	0	Random Only
'EX_1glyc_hs(e)'	0.994087	0.0496907	1	1	0.99971	0.00467856	3	0	2	1.43541	0	0.2	0	Random Only
'EX_1mncam(e)'	1	1	1	1	0.99971	0.00467856	0	0	2	0	0	0.2	0	Random Only
'EX_2425dhvitd2(e)'	1	1	1	1	0.99971	0.00467856	0	0	2	0	0	0.2	0	Random Only
'EX_2425dhvitd3(e)'	0.993103	0.0572918	1	1	0.99971	0.00467856	3	0	2	1.43541	0	0.2	0	Random Only
'EX_24nph(e)'	1	1	1	1	0.99971	0.00467856	0	0	2	0	0	0.2	0	Random Only
'EX_25hvitd2(e)'	1	1	1	1	0.99971	0.00467856	0	0	2	0	0	0.2	0	Random Only
'EX_25hvitd3(e)'	0.993092	0.057381	1	1	0.99971	0.00467856	3	0	2	1.43541	0	0.2	0	Random Only
'EX_2hb(e)'	0.890038	0.061132	0.889099	0.0013058	0.950887	0.0486579	183	6000	450	87.5598	100	45	1	Both
'EX_2mcit(e)'	0.89234	0.0641805	0.889099	0.0013058	0.950887	0.0486579	179	6000	450	85.6459	100	45	1	Both
'EX_35cgmp(e)'	0.961242	0.06509	1	1	0.987539	0.0270411	29	0	107	13.8756	0	10.7	0	Random Only
'EX_3aib(e)'	0.965178	0.0641282	1	1	0.994375	0.0117004	28	0	2	13.3971	0	0.2	0	Random Only
'EX_3mlda(e)'	0.986945	0.0624583	1	1	0.945456	0.0535439	14	0	462	6.69856	0	46.2	0	Random Only
'EX_4abut(e)'	0.979915	0.0678078	1	1	0.998139	0.0102067	23	0	14	11.0048	0	1.4	0	Random Only
'EX_4hdebrisoquine(e)'	1	1	1	1	0.99971	0.00467856	0	0	2	0	0	0.2	0	Random Only
'EX_4hphac(e)'	0.992631	0.0596051	1	1	0.999706	0.00468018	3	0	2	1.43541	0	0.2	0	Random Only
'EX_4mptnl(e)'	1	1	1	1	0.99971	0.00467856	0	0	2	0	0	0.2	0	Random Only
'EX_4nph(e)'	1	1	1	1	0.99971	0.00467856	0	0	2	0	0	0.2	0	Random Only
'EX_4nphsf(e)'	1	1	1	1	0.99971	0.00467856	0	0	2	0	0	0.2	0	Random Only
'EX_4pyrdx(e)'	1	1	1	1	0.99971	0.00467856	0	0	2	0	0	0.2	0	Random Only
'EX_5adtststerone(e)'	1	1	1	1	0.99971	0.00467856	0	0	2	0	0	0.2	0	Random Only
'EX_5adtststeroneglc(e)'	1	1	1	1	0.99971	0.00467856	0	0	2	0	0	0.2	0	Random Only
'EX_5dhf(e)'	1	1	1	1	0.99971	0.00467856	0	0	2	0	0	0.2	0	Random Only
'EX_5fthf(e)'	1	1	1	1	0.99971	0.00467856	0	0	2	0	0	0.2	0	Random Only
'EX_5htrp(e)'	0.851054	0.06567	0.843563	0.00377889	0.736031	0.0498875	193	6000	1000	92.3445	100	100	1	Both
'EX_5mthf(e)'	1	1	1	1	0.99971	0.00467856	0	0	2	0	0	0.2	0	Random Only
'EX_5thf(e)'	1	1	1	1	0.99971	0.00467856	0	0	2	0	0	0.2	0	Random Only
'EX_6dhf(e)'	1	1	1	1	0.99971	0.00467856	0	0	2	0	0	0.2	0	Random Only
'EX_6htststerone(e)'	1	1	1	1	0.99971	0.00467856	0	0	2	0	0	0.2	0	Random Only
'EX_6thf(e)'	1	1	1	1	0.99971	0.00467856	0	0	2	0	0	0.2	0	Random Only
'EX_7dhf(e)'	1	1	1	1	0.99971	0.00467856	0	0	2	0	0	0.2	0	Random Only
'EX_7thf(e)'	1	1	1	1	0.99971	0.00467856	0	0	2	0	0	0.2	0	Random Only
'EX_9-cis-retfa(e)'	1	1	1	1	0.99971	0.00467856	0	0	2	0	0	0.2	0	Random Only
'EX_CLPND(e)'	1	1	1	1	0.99971	0.00467856	0	0	2	0	0	0.2	0	Random Only
'EX_Lcystin(e)'	1	1	1	1	0.99971	0.00467856	0	0	2	0	0	0.2	0	Random Only
'EX_Rtotal(e)'	0.995484	0.0407169	1	1	0.99971	0.00467856	3	0	2	1.43541	0	0.2	0	Random Only
'EX_Rtotal2(e)'	0.995484	0.0407169	1	1	0.99971	0.00467856	3	0	2	1.43541	0	0.2	0	Random Only
'EX_Rtotal3(e)'	0.995484	0.0407169	1	1	0.99971	0.00467856	3	0	2	1.43541	0	0.2	0	Random Only
'EX_Tyr-ggn(e)'	1	1	1	1	0.99971	0.00467856	0	0	2	0	0	0.2	0	Random Only
'EX_abt(e)'	0.993851	0.0510733	1	1	0.99971	0.00467856	3	0	2	1.43541	0	0.2	0	Random Only
'EX_ac(e)'	0.993764	0.0519014	1	1	0.99971	0.00467856	3	0	2	1.43541	0	0.2	0	Random Only
'EX_acac(e)'	0.992825	0.0595976	1	1	0.99971	0.00467856	3	0	2	1.43541	0	0.2	0	Random Only
'EX_acald(e)'	1	1	1	1	0.99971	0.00467856	0	0	2	0	0	0.2	0	Random Only
'EX_acetone(e)'	0.992807	0.0595957	1	1	0.99971	0.00467856	3	0	2	1.43541	0	0.2	0	Random Only
'EX_acgalfucgalacgalfuc12gal14acglcgalgluside_hs(e)'	1	1	1	1	0.99971	0.00467856	0	0	2	0	0	0.2	0	Random Only
'EX_acgalfucgalacgalfucgalacglcgal14acglcgalgluside_hs(e)'	1	1	1	1	0.99971	0.00467856	0	0	2	0	0	0.2	0	Random Only
'EX_acgam(e)'	1	1	1	1	0.99971	0.00467856	0	0	2	0	0	0.2	0	Random Only
'EX_ach(e)'	1	1	1	1	0.99971	0.00467856	0	0	2	0	0	0.2	0	Random Only
'EX_acn13acngalgbside_hs(e)'	1	1	1	1	0.99971	0.00467856	0	0	2	0	0	0.2	0	Random Only
'EX_acn23acngalgbside_hs(e)'	1	1	1	1	0.99971	0.00467856	0	0	2	0	0	0.2	0	Random Only
'EX_acnacngal14acglcgalgluside_hs(e)'	1	1	1	1	0.99971	0.00467856	0	0	2	0	0	0.2	0	Random Only
'EX_acnacngalgbside_hs(e)'	1	1	1	1	0.99971	0.00467856	0	0	2	0	0	0.2	0	Random Only
'EX_acngalacglcgal14acglcgalgluside_hs(e)'	1	1	1	1	0.99971	0.00467856	0	0	2	0	0	0.2	0	Random Only
'EX_ade(e)'	0.955406	0.0641623	1	1	0.984347	0.0301926	29	0	134	13.8756	0	13.4	0	Random Only
'EX_adn(e)'	0.955727	0.0642887	1	1	0.984347	0.0301926	29	0	134	13.8756	0	13.4	0	Random Only
'EX_adp'	1	1	1	1	0.99971	0.00467856	0	0	2	0	0	0.2	0	Random Only
'EX_adprbp(e)'	1	1	1	1	0.99971	0.00467856	0	0	2	0	0	0.2	0	Random Only
'EX_adprib(e)'	1	1	1	1	0.99971	0.00467856	0	0	2	0	0	0.2	0	Random Only
'EX_adrn(e)'	1	1	1	1	0.99971	0.00467856	0	0	2	0	0	0.2	0	Random Only
'EX_adrnl(e)'	1	1	1	1	0.99971	0.00467856	0	0	2	0	0	0.2	0	Random Only
'EX_aflatoxin(e)'	1	1	1	1	0.99971	0.00467856	0	0	2	0	0	0.2	0	Random Only
'EX_ahandrostanglc(e)'	1	1	1	1	0.99971	0.00467856	0	0	2	0	0	0.2	0	Random Only
'EX_ak2lgchol_hs(e)'	1	1	1	1	0.99971	0.00467856	0	0	2	0	0	0.2	0	Random Only
'EX_akg(e)'	0.992365	0.059704	1	1	0.99971	0.00467856	3	0	2	1.43541	0	0.2	0	Random Only
'EX_ala-B(e)'	1	1	1	1	0.99971	0.00467856	0	0	2	0	0	0.2	0	Random Only
'EX_ala-D(e)'	0.961062	0.0415493	1	1	0.984347	0.0301926	23	0	134	11.0048	0	13.4	0	Random Only
'EX_ala-L(e)'	0.961062	0.0415493	1	1	0.984347	0.0301926	23	0	134	11.0048	0	13.4	0	Random Only
'EX_aldstrn(e)'	1	1	1	1	0.99971	0.00467856	0	0	2	0	0	0.2	0	Random Only
'EX_amp(e)'	1	1	1	1	0.99971	0.00467856	0	0	2	0	0	0.2	0	Random Only
'EX_andrstrn(e)'	1	1	1	1	0.99971	0.00467856	0	0	2	0	0	0.2	0	Random Only
'EX_andrstrnglc(e)'	1	1	1	1	0.99971	0.00467856	0	0	2	0	0	0.2	0	Random Only
'EX_aqcobal(e)'	1	1	1	1	0.99971	0.00467856	0	0	2	0	0	0.2	0	Random Only
'EX_arab-L(e)'	1	1	1	1	0.99971	0.00467856	0	0	2	0	0	0.2	0	Random Only
'EX_arach(e)'	1	1	1	1	0.99971	0.00467856	0	0	2	0	0	0.2	0	Random Only
'EX_arachd(e)'	1	1	1	1	0.99971	0.00467856	0	0	2	0	0	0.2	0	Random Only
'EX_arg-L(e)'	1	1	1	1	0.998873	0.00752424	0	0	5	0	0	0.5	0	Random Only
'EX_ascb-L(e)'	1	1	1	1	0.99971	0.00467856	0	0	2	0	0	0.2	0	Random Only
'EX_asn-L(e)'	0.955371	0.0641574	1	1	0.984347	0.0301926	29	0	134	13.8756	0	13.4	0	Random Only
'EX_asp-D(e)'	1	1	1	1	0.99971	0.00467856	0	0	2	0	0	0.2	0	Random Only
'EX_asp-L(e)'	1	1	1	1	0.99971	0.00467856	0	0	2	0	0	0.2	0	Random Only
'EX_atp(e)'	1	1	1	1	0.99971	0.00467856	0	0	2	0	0	0.2	0	Random Only
'EX_avite1(e)'	1	1	1	1	0.99971	0.00467856	0	0	2	0	0	0.2	0	Random Only
'EX_avite2(e)'	1	1	1	1	0.99971	0.00467856	0	0	2	0	0	0.2	0	Random Only
'EX_bhb(e)'	0.993141	0.0570982	1	1	0.99971	0.00467856	3	0	2	1.43541	0	0.2	0	Random Only
'EX_bildglcur(e)'	1	1	1	1	0.99971	0.00467856	0	0	2	0	0	0.2	0	Random Only
'EX_bilglcur(e)'	1	1	1	1	0.99971	0.00467856	0	0	2	0	0	0.2	0	Random Only
'EX_bilirub(e)'	1	1	1	1	0.99971	0.00467856	0	0	2	0	0	0.2	0	Random Only
'EX_biocyt(e)'	1	1	1	1	0.99971	0.00467856	0	0	2	0	0	0.2	0	Random Only
'EX_btn(e)'	1	1	1	1	0.99971	0.00467856	0	0	2	0	0	0.2	0	Random Only
'EX_but(e)'	1	1	1	1	0.99971	0.00467856	0	0	2	0	0	0.2	0	Random Only
'EX_bvite(e)'	1	1	1	1	0.99971	0.00467856	0	0	2	0	0	0.2	0	Random Only
'EX_bz(e)'	1	1	1	1	0.99971	0.00467856	0	0	2	0	0	0.2	0	Random Only
'EX_ca2(e)'	1	1	1	1	0.99971	0.00467856	0	0	2	0	0	0.2	0	Random Only
'EX_camp(e)'	0.95667	0.0644552	1	1	0.984729	0.0298381	29	0	132	13.8756	0	13.2	0	Random Only
'EX_cca_d3(e)'	1	1	1	1	0.99971	0.00467856	0	0	2	0	0	0.2	0	Random Only
'EX_cgly(e)'	0.921965	0.0653925	0.92079	0.00333605	0.867993	0.033029	173	6000	974	82.7751	100	97.4	0	Both
'EX_chol(e)'	0.992707	0.0584618	1	1	0.999649	0.0048856	3	0	2	1.43541	0	0.2	0	Random Only
'EX_cholate(e)'	1	1	1	1	0.99971	0.00467856	0	0	2	0	0	0.2	0	Random Only
'EX_chsterol(e)'	0.993079	0.0574897	1	1	0.99971	0.00467856	3	0	2	1.43541	0	0.2	0	Random Only
'EX_chtn(e)'	1	1	1	1	0.99971	0.00467856	0	0	2	0	0	0.2	0	Random Only
'EX_cit(e)'	0.99128	0.0599056	1	1	0.99971	0.00467856	3	0	2	1.43541	0	0.2	0	Random Only
'EX_cl(e)'	1	1	1	1	0.99971	0.00467856	0	0	2	0	0	0.2	0	Random Only
'EX_cmp(e)'	1	1	1	1	0.99971	0.00467856	0	0	2	0	0	0.2	0	Random Only
'EX_co(e)'	1	1	1	1	0.99971	0.00467856	0	0	2	0	0	0.2	0	Random Only
'EX_co2(e)'	0.992904	0.0571741	1	1	0.99971	0.00467856	3	0	2	1.43541	0	0.2	0	Random Only
'EX_coumarin(e)'	1	1	1	1	0.99971	0.00467856	0	0	2	0	0	0.2	0	Random Only
'EX_creat(e)'	0.964489	0.0644473	1	1	0.988126	0.0255091	28	0	107	13.3971	0	10.7	0	Random Only
'EX_crmp_hs(e)'	0.995733	0.0287599	1	1	0.999084	0.00708116	3	0	6	1.43541	0	0.6	0	Random Only
'EX_crn(e)'	1	1	1	1	0.99971	0.00467856	0	0	2	0	0	0.2	0	Random Only
'EX_crtsl(e)'	1	1	1	1	0.99971	0.00467856	0	0	2	0	0	0.2	0	Random Only
'EX_crtstrn(e)'	1	1	1	1	0.99971	0.00467856	0	0	2	0	0	0.2	0	Random Only
'EX_crvnc(e)'	1	1	1	1	0.99971	0.00467856	0	0	2	0	0	0.2	0	Random Only
'EX_csn(e)'	1	1	1	1	0.99971	0.00467856	0	0	2	0	0	0.2	0	Random Only
'EX_cspg_a(e)'	1	1	1	1	0.99971	0.00467856	0	0	2	0	0	0.2	0	Random Only
'EX_cspg_b(e)'	1	1	1	1	0.99971	0.00467856	0	0	2	0	0	0.2	0	Random Only
'EX_cspg_c(e)'	1	1	1	1	0.99971	0.00467856	0	0	2	0	0	0.2	0	Random Only
'EX_cspg_d(e)'	1	1	1	1	0.99971	0.00467856	0	0	2	0	0	0.2	0	Random Only
'EX_cspg_e(e)'	1	1	1	1	0.99971	0.00467856	0	0	2	0	0	0.2	0	Random Only
'EX_cyan(e)'	1	1	1	1	0.99971	0.00467856	0	0	2	0	0	0.2	0	Random Only
'EX_cys-L(e)'	0.922002	0.0654319	0.92079	0.00333605	0.867999	0.0330493	173	6000	974	82.7751	100	97.4	0	Both
'EX_cytd(e)'	0.957771	0.0645789	1	1	0.985447	0.0291576	29	0	124	13.8756	0	12.4	0	Random Only
'EX_dad-2(e)'	0.955877	0.0643398	1	1	0.984347	0.0301926	29	0	134	13.8756	0	13.4	0	Random Only
'EX_dag_hs(e)'	0.995745	0.0353641	1	1	0.99971	0.00467856	3	0	2	1.43541	0	0.2	0	Random Only
'EX_dcsptn1(e)'	1	1	1	1	0.99971	0.00467856	0	0	2	0	0	0.2	0	Random Only
'EX_dcyt(e)'	0.957008	0.0644918	1	1	0.984942	0.0296382	29	0	130	13.8756	0	13	0	Random Only
'EX_debrisoquine(e)'	1	1	1	1	0.99971	0.00467856	0	0	2	0	0	0.2	0	Random Only
'EX_dgchol(e)'	1	1	1	1	0.99971	0.00467856	0	0	2	0	0	0.2	0	Random Only
'EX_dgsn(e)'	0.955809	0.0643162	1	1	0.984347	0.0301926	29	0	134	13.8756	0	13.4	0	Random Only
'EX_dhdascb(e)'	1	1	1	1	0.99971	0.00467856	0	0	2	0	0	0.2	0	Random Only
'EX_dheas(e)'	1	1	1	1	0.99971	0.00467856	0	0	2	0	0	0.2	0	Random Only
'EX_dhf(e)'	1	1	1	1	0.99971	0.00467856	0	0	2	0	0	0.2	0	Random Only
'EX_digalsgalside_hs(e)'	1	1	1	1	0.99971	0.00467856	0	0	2	0	0	0.2	0	Random Only
'EX_din(e)'	0.961514	0.0651513	1	1	0.987611	0.0269622	29	0	107	13.8756	0	10.7	0	Random Only
'EX_dlnlcg(e)'	1	1	1	1	0.99971	0.00467856	0	0	2	0	0	0.2	0	Random Only
'EX_dmhptcrn(e)'	1	1	1	1	0.99971	0.00467856	0	0	2	0	0	0.2	0	Random Only
'EX_dopa(e)'	1	1	1	1	0.99971	0.00467856	0	0	2	0	0	0.2	0	Random Only
'EX_dopasf(e)'	1	1	1	1	0.99971	0.00467856	0	0	2	0	0	0.2	0	Random Only
'EX_drib(e)'	0.993066	0.0575955	1	1	0.99971	0.00467856	3	0	2	1.43541	0	0.2	0	Random Only
'EX_duri(e)'	0.978449	0.0684447	1	1	0.997743	0.0111733	26	0	16	12.4402	0	1.6	0	Random Only
'EX_eaflatoxin(e)'	1	1	1	1	0.99971	0.00467856	0	0	2	0	0	0.2	0	Random Only
'EX_ebastine(e)'	1	1	1	1	0.99971	0.00467856	0	0	2	0	0	0.2	0	Random Only
'EX_ebastineoh(e)'	1	1	1	1	0.99971	0.00467856	0	0	2	0	0	0.2	0	Random Only
'EX_eicostet(e)'	1	1	1	1	0.99971	0.00467856	0	0	2	0	0	0.2	0	Random Only
'EX_elaid(e)'	0.996827	0.0265776	1	1	0.99971	0.00467856	3	0	2	1.43541	0	0.2	0	Random Only
'EX_estradiol(e)'	1	1	1	1	0.99971	0.00467856	0	0	2	0	0	0.2	0	Random Only
'EX_estradiolglc(e)'	1	1	1	1	0.99971	0.00467856	0	0	2	0	0	0.2	0	Random Only
'EX_estriolglc(e)'	1	1	1	1	0.99971	0.00467856	0	0	2	0	0	0.2	0	Random Only
'EX_estroneglc(e)'	1	1	1	1	0.99971	0.00467856	0	0	2	0	0	0.2	0	Random Only
'EX_estrones(e)'	1	1	1	1	0.99971	0.00467856	0	0	2	0	0	0.2	0	Random Only
'EX_etoh(e)'	1	1	1	1	0.99971	0.00467856	0	0	2	0	0	0.2	0	Random Only
'EX_fe2(e)'	1	1	1	1	0.99971	0.00467856	0	0	2	0	0	0.2	0	Random Only
'EX_fol(e)'	1	1	1	1	0.99971	0.00467856	0	0	2	0	0	0.2	0	Random Only
'EX_for(e)'	0.993024	0.0579436	1	1	0.99971	0.00467856	3	0	2	1.43541	0	0.2	0	Random Only
'EX_fru(e)'	0.99291	0.0588905	1	1	0.99971	0.00467856	3	0	2	1.43541	0	0.2	0	Random Only
'EX_fuc-L(e)'	1	1	1	1	0.99971	0.00467856	0	0	2	0	0	0.2	0	Random Only
'EX_fuc13galacglcgal14acglcgalgluside_hs(e)'	1	1	1	1	0.99971	0.00467856	0	0	2	0	0	0.2	0	Random Only
'EX_fuc14galacglcgalgluside_hs(e)'	1	1	1	1	0.99971	0.00467856	0	0	2	0	0	0.2	0	Random Only
'EX_fucacgalfucgalacglcgalgluside_hs(e)'	1	1	1	1	0.99971	0.00467856	0	0	2	0	0	0.2	0	Random Only
'EX_fucacngal14acglcgalgluside_hs(e)'	1	1	1	1	0.99971	0.00467856	0	0	2	0	0	0.2	0	Random Only
'EX_fucacngalacglcgalgluside_hs(e)'	1	1	1	1	0.99971	0.00467856	0	0	2	0	0	0.2	0	Random Only
'EX_fucfuc12gal14acglcgalgluside_hs(e)'	1	1	1	1	0.99971	0.00467856	0	0	2	0	0	0.2	0	Random Only
'EX_fucfuc132galacglcgal14acglcgalgluside_hs(e)'	1	1	1	1	0.99971	0.00467856	0	0	2	0	0	0.2	0	Random Only
'EX_fucfucfucgalacglc13galacglcgal14acglcgalgluside_hs(e)'	1	1	1	1	0.99971	0.00467856	0	0	2	0	0	0.2	0	Random Only
'EX_fucfucfucgalacglcgal14acglcgalgluside_hs(e)'	1	1	1	1	0.99971	0.00467856	0	0	2	0	0	0.2	0	Random Only
'EX_fucfucgalacglcgalgluside_hs(e)'	1	1	1	1	0.99971	0.00467856	0	0	2	0	0	0.2	0	Random Only
'EX_fucgal14acglcgalgluside_hs(e)'	1	1	1	1	0.99971	0.00467856	0	0	2	0	0	0.2	0	Random Only
'EX_fucgalfucgalacglcgalgluside_hs(e)'	1	1	1	1	0.99971	0.00467856	0	0	2	0	0	0.2	0	Random Only
'EX_fucgalgbside_hs(e)'	1	1	1	1	0.99971	0.00467856	0	0	2	0	0	0.2	0	Random Only
[truncated: 2,170 more rows]
